# Supplementary material for: Multistructural partition function truncation and its effect on the thermal rate constants
Source: Royal Society of Chemistry journal article supplement (doi:10.1039/d3cp02401f), 2023-01-01
Supplement: d3cp02401f1.pdf [file d3cp02401f1.pdf]

## Electronic Supplementary Information (ESI)

# Multistructural partition function truncation and its effect on the thermal rate constants

Joel Leitão Nascimento, Maiara Oliveira Passos, and Tiago Vinicius Alves\*

*Departamento de Físico-Química, Instituto de Química, Universidade Federal da Bahia,  
Rua Barão de Jeremoabo, 147, Salvador, Bahia, 40170-115, Brazil*

\*E-mail address: [tiagova@ufba.br](mailto:tiagova@ufba.br)

## Sections

|       |                                                                  |     |
|-------|------------------------------------------------------------------|-----|
| S.1.  | Nomenclature IUPAC - Dihedral Angles . . . . .                   | 5   |
| S.2.  | Cartesian Coordinates . . . . .                                  | 5   |
| S.2.1 | Methyl Pentanoate . . . . .                                      | 5   |
| S.2.2 | $(TS_{\alpha'})^{\ddagger}$ . . . . .                            | 16  |
| S.2.3 | $(TS_{\alpha})^{\ddagger}$ . . . . .                             | 38  |
| S.2.4 | $(TS_{\beta})^{\ddagger}$ . . . . .                              | 51  |
| S.2.5 | $(TS_{\gamma})^{\ddagger}$ . . . . .                             | 71  |
| S.2.6 | $(TS_{\delta})^{\ddagger}$ . . . . .                             | 91  |
| S.3.  | Scaled Vibrational Frequencies . . . . .                         | 122 |
| S.3.1 | Methyl Pentanoate . . . . .                                      | 122 |
| S.3.2 | $(TS_{\alpha'})^{\ddagger}$ . . . . .                            | 129 |
| S.3.3 | $(TS_{\alpha})^{\ddagger}$ . . . . .                             | 143 |
| S.3.4 | $(TS_{\beta})^{\ddagger}$ . . . . .                              | 151 |
| S.3.5 | $(TS_{\gamma})^{\ddagger}$ . . . . .                             | 165 |
| S.3.6 | $(TS_{\delta})^{\ddagger}$ . . . . .                             | 178 |
| S.4.  | Recrossing and Semiclassical Transmission Coefficients . . . . . | 199 |
| S.4.1 | $(R_{\alpha'})$ . . . . .                                        | 199 |
| S.4.2 | $(R_{\alpha})$ . . . . .                                         | 199 |
| S.4.3 | $(R_{\beta})$ . . . . .                                          | 200 |
| S.4.4 | $(R_{\gamma})$ . . . . .                                         | 201 |
| S.4.5 | $(R_{\delta})$ . . . . .                                         | 201 |

## Tables

|      |                                                                                                                                        |     |
|------|----------------------------------------------------------------------------------------------------------------------------------------|-----|
| S.1. | All conformers of MP, the torsional angles, and the difference in energy between them (in kcal/mol). . . . .                           | 202 |
| S.2. | All conformers of $(TS_{\alpha'})^{\ddagger}$ , the torsional angles, and the difference in energy between them (in kcal/mol). . . . . | 203 |

|      |                                                                                                                                                                                |     |
|------|--------------------------------------------------------------------------------------------------------------------------------------------------------------------------------|-----|
| S.3. | All conformers of $(\text{TS}_\alpha)^\ddagger$ , the torsional angles, and the difference in energy between them (in kcal/mol). . . . .                                       | 204 |
| S.4. | All conformers of $(\text{TS}_\beta)^\ddagger$ , the torsional angles, and the difference in energy between them (in kcal/mol). . . . .                                        | 205 |
| S.5. | All conformers of $(\text{TS}_\gamma)^\ddagger$ , the torsional angles, and the difference in energy between them (in kcal/mol). . . . .                                       | 206 |
| S.6. | All conformers of $(\text{TS}_\delta)^\ddagger$ , the torsional angles, and the difference in energy between them (in kcal/mol). . . . .                                       | 207 |
| S.7. | Forward classical barriers ( $V^\ddagger$ ) for $(\text{R}_{\alpha'})$ - $(\text{R}_\delta)$ , obtained at the theory level DLPNO-CCSD(T)-F12. All values in kcal/mol. . . . . | 209 |
| S.8. | MS-CVT/SCT rate constants for $(\text{R}_{\alpha'})$ - $(\text{R}_\delta)$ , including all conformations of methyl pentanoate and transition states. . . . .                   | 209 |

## Figures

|      |                                                                                                                                                                                                                                                                                                                                                               |     |
|------|---------------------------------------------------------------------------------------------------------------------------------------------------------------------------------------------------------------------------------------------------------------------------------------------------------------------------------------------------------------|-----|
| S.1. | Three-dimensional representation of methyl pentanoate (MP) and transition states generated by the reactions $(\text{R}_{\alpha'})$ - $(\text{R}_\delta)$ . . . . .                                                                                                                                                                                            | 210 |
| S.2. | Heatmaps plots show the truncation efficiency on the rovibrational partition function, as a function of the temperature, for MP (A), $(\text{TS}_{\alpha'})^\ddagger$ (B), $(\text{TS}_\alpha)^\ddagger$ (C), $(\text{TS}_\beta)^\ddagger$ (D), $(\text{TS}_\gamma)^\ddagger$ (E), and $(\text{TS}_\delta)^\ddagger$ (F). . . . .                             | 211 |
| S.3. | Multistructural factors ( $F_{N_X}^{\text{MS-QH,X}}$ ) as a function of temperature and different sets of conformers, for MP (A), $(\text{TS}_{\alpha'})^\ddagger$ (B), $(\text{TS}_\alpha)^\ddagger$ (C), $(\text{TS}_\beta)^\ddagger$ (D), $(\text{TS}_\gamma)^\ddagger$ (E), and $(\text{TS}_\delta)^\ddagger$ (F). . . . .                                | 212 |
| S.4. | Torsional anharmonic factors ( $F_{N_X}^{\text{T,X}}$ ) as a function of temperature and different sets of conformers, for MP (A), $(\text{TS}_{\alpha'})^\ddagger$ (B), $(\text{TS}_\alpha)^\ddagger$ (C), $(\text{TS}_\beta)^\ddagger$ (D), $(\text{TS}_\gamma)^\ddagger$ (E), and $(\text{TS}_\delta)^\ddagger$ (F). . . . .                               | 213 |
| S.5. | Individual multistructural torsional anharmonic factors ( $F_{N_X}^{\text{MS-T,X}}$ ) as a function of temperature and different sets of conformers, for MP (A), $(\text{TS}_{\alpha'})^\ddagger$ (B), $(\text{TS}_\alpha)^\ddagger$ (C), $(\text{TS}_\beta)^\ddagger$ (D), $(\text{TS}_\gamma)^\ddagger$ (E), and $(\text{TS}_\delta)^\ddagger$ (F). . . . . | 214 |

|                                                                                                                                                                                                                                                                             |     |
|-----------------------------------------------------------------------------------------------------------------------------------------------------------------------------------------------------------------------------------------------------------------------------|-----|
| S.6. Multistructural torsional anharmonic factor ( $F_{N_X}^{\text{MS-T}}$ ), as a function of temperature and different sets of conformers. ( $R_{\alpha'}$ ) (A), ( $R_{\alpha}$ ) (B), ( $R_{\beta}$ ) (C), ( $R_{\gamma}$ ) (D), and ( $R_{\delta}$ ) (E). . . . .      | 215 |
| S.7. Minimum energy path ( $V_{\text{MEP}}$ ), in kcal/mol, obtained at MPWB1K/6-31+G(d,p) theory level. . . . .                                                                                                                                                            | 216 |
| S.8. Arrhenius plots showing MS-CVT/SCT rate constants, as a function of conformational set. Theoretical and experimental values are also showed. ( $R_{\alpha'}$ ) (A), ( $R_{\alpha}$ ) (B), ( $R_{\beta}$ ) (C), ( $R_{\gamma}$ ) (D), and ( $R_{\delta}$ ) (E). . . . . | 217 |
| S.9. Arrhenius plots showing overall MS-CVT/SCT and SS-CVT/SCT rate constants, as a function of temperature. Theoretical and experimental values are also showed. . . . .                                                                                                   | 218 |
| S.10. Branching ratios for ( $R_{\alpha'}$ )-( $R_{\delta}$ ), calculated by ratio between the individual and the total rate constants. Solid line: obtained from MS-CVT/SCT rate constants. Dashed line: obtained from SS-CVT/SCT rate constants. . . . .                  | 218 |
| S.11. Mean Unsigned Percentage Error (MUPE) of truncated thermal rate constants estimative, at 1200 K, compared to the full MS-CVT/SCT results (top) and Gerasimov et al. findings (bottom) for ( $R_{\alpha'}$ ). . . . .                                                  | 219 |
| S.12. Mean Unsigned Percentage Error (MUPE) of truncated thermal rate constants estimative, at 1200 K, compared to the full MS-CVT/SCT results (top) and Gerasimov et al. findings (bottom) for ( $R_{\alpha}$ ). . . . .                                                   | 220 |
| S.13. Mean Unsigned Percentage Error (MUPE) of truncated thermal rate constants estimative, at 1200 K, compared to the full MS-CVT/SCT results (top) and Gerasimov et al. findings (bottom) for ( $R_{\beta}$ ). . . . .                                                    | 221 |
| S.14. Mean Unsigned Percentage Error (MUPE) of truncated thermal rate constants estimative, at 1200 K, compared to the full MS-CVT/SCT results (top) and Gerasimov et al. findings (bottom) for ( $R_{\gamma}$ ). . . . .                                                   | 222 |
| S.15. Mean Unsigned Percentage Error (MUPE) of truncated thermal rate constants estimative, at 1200 K, compared to the full MS-CVT/SCT results (top) and Gerasimov et al. findings (bottom) for ( $R_{\delta}$ ). . . . .                                                   | 223 |

## S.1. Nomenclature IUPAC - Dihedral Angles

- C  $\Rightarrow \phi_i = 0^\circ$
- C-  $\Rightarrow \phi_i \in (-30^\circ, 0^\circ) \Leftrightarrow$  C+  $\Rightarrow \phi_i \in (0^\circ, +30^\circ)$ ;
- G-  $\Rightarrow \phi_i \in (-75^\circ, -30^\circ) \Leftrightarrow$  G+  $\Rightarrow \phi_i \in (+30^\circ, +75^\circ)$ ;
- g-  $\Rightarrow \phi_i \in (-90^\circ, -75^\circ) \Leftrightarrow$  g+  $\Rightarrow \phi_i \in (+75^\circ, +90^\circ)$ ;
- a-  $\Rightarrow \phi_i \in (-105^\circ, -90^\circ) \Leftrightarrow$  a+  $\Rightarrow \phi_i \in (+90^\circ, +105^\circ)$ ;
- A-  $\Rightarrow \phi_i \in (-150^\circ, -105^\circ) \Leftrightarrow$  A+  $\Rightarrow \phi_i \in (+105^\circ, +150^\circ)$ ;
- T-  $\Rightarrow \phi_i \in (-180^\circ, -105^\circ) \Leftrightarrow$  T+  $\Rightarrow \phi_i \in (+150^\circ, +180^\circ)$ ;
- T  $\Rightarrow \phi_i = 180^\circ$ .

## S.2. Cartesian Coordinates

### S.2.1 Methyl Pentanoate

\* E = +0.000 kcal/mol ; Conformer 001

|   |          |          |          |
|---|----------|----------|----------|
| C | +0.00000 | +0.00000 | +0.00000 |
| C | +0.00000 | +0.00000 | +1.51495 |
| C | +1.40178 | +0.00000 | +2.09498 |
| C | +1.42194 | +0.00408 | +3.60884 |
| C | +0.94896 | -1.28765 | +4.20236 |
| O | +0.68709 | -1.16555 | +5.50227 |
| C | +0.27722 | -2.35483 | +6.15344 |
| O | +0.83371 | -2.32715 | +3.61062 |
| H | +0.10887 | -2.08365 | +7.18753 |
| H | -0.63451 | -2.73719 | +5.70533 |
| H | +1.04953 | -3.11400 | +6.07822 |
| H | +2.43209 | +0.16382 | +3.98743 |
| H | +0.81848 | +0.81171 | +4.02021 |
| H | +1.94038 | -0.87667 | +1.73717 |
| H | +1.94335 | +0.87522 | +1.73583 |
| H | -0.54039 | +0.87471 | +1.88178 |
| H | -0.53467 | -0.87612 | +1.87995 |
| H | -1.01156 | +0.00502 | -0.39880 |
| H | +0.51569 | +0.87454 | -0.39395 |
| H | +0.50418 | -0.88294 | -0.38841 |

\* E = +0.146 kcal/mol ; Conformer 002

|   |          |          |          |
|---|----------|----------|----------|
| C | +0.00000 | +0.00000 | +0.00000 |
| C | +0.00000 | +0.00000 | +1.51519 |
| C | +1.39944 | +0.00000 | +2.09806 |

|   |          |          |          |
|---|----------|----------|----------|
| C | +1.39579 | +0.00000 | +3.60978 |
| C | +2.77162 | +0.00000 | +4.19795 |
| O | +2.73540 | +0.00000 | +5.53005 |
| C | +3.99865 | +0.00000 | +6.17057 |
| O | +3.79803 | -0.00000 | +3.57437 |
| H | +3.79200 | +0.00000 | +7.23295 |
| H | +4.56555 | -0.88279 | +5.89176 |
| H | +4.56555 | +0.88279 | +5.89176 |
| H | +0.86798 | +0.86787 | +4.00614 |
| H | +0.86798 | -0.86787 | +4.00614 |
| H | +1.95176 | -0.86849 | +1.74047 |
| H | +1.95176 | +0.86849 | +1.74047 |
| H | -0.54524 | +0.87186 | +1.88081 |
| H | -0.54524 | -0.87186 | +1.88081 |
| H | -1.01117 | -0.00000 | -0.39973 |
| H | +0.51136 | +0.87781 | -0.39097 |
| H | +0.51136 | -0.87781 | -0.39097 |

\* E = +0.687 kcal/mol ; Conformer 003

|   |          |          |          |
|---|----------|----------|----------|
| C | +0.00000 | +0.00000 | +0.00000 |
| C | +0.00000 | +0.00000 | +1.51682 |
| C | +1.38908 | +0.00000 | +2.13479 |
| C | +2.20421 | -1.24155 | +1.83220 |
| C | +1.65033 | -2.47373 | +2.47937 |
| O | +2.14943 | -3.58319 | +1.93704 |
| C | +1.71561 | -4.79540 | +2.52750 |
| O | +0.87105 | -2.49133 | +3.39392 |
| H | +2.20830 | -5.58633 | +1.97706 |
| H | +1.99515 | -4.82795 | +3.57599 |
| H | +0.63707 | -4.88998 | +2.44965 |
| H | +2.30392 | -1.42628 | +0.76516 |
| H | +3.22226 | -1.13150 | +2.20786 |
| H | +1.94268 | +0.86973 | +1.77993 |
| H | +1.29927 | +0.09724 | +3.21487 |
| H | -0.53128 | +0.88213 | +1.87254 |
| H | -0.55627 | -0.85812 | +1.89247 |
| H | -1.01230 | +0.07021 | -0.39088 |
| H | +0.56457 | +0.84470 | -0.39303 |
| H | +0.43843 | -0.90786 | -0.40979 |

\* E = +0.728 kcal/mol ; Conformer 004

|   |          |          |          |
|---|----------|----------|----------|
| C | +0.00000 | +0.00000 | +0.00000 |
| C | +0.00000 | +0.00000 | +1.51684 |
| C | +1.38712 | +0.00000 | +2.13553 |
| C | +2.18792 | -1.24122 | +1.80713 |
| C | +3.50759 | -1.28158 | +2.51149 |
| O | +4.20743 | -2.36603 | +2.17983 |
| C | +5.47113 | -2.48758 | +2.80735 |

|   |          |          |          |
|---|----------|----------|----------|
| O | +3.91328 | -0.45746 | +3.28544 |
| H | +5.90029 | -3.40840 | +2.43411 |
| H | +6.10296 | -1.64174 | +2.55478 |
| H | +5.35672 | -2.52920 | +3.88609 |
| H | +1.64293 | -2.14581 | +2.08103 |
| H | +2.38647 | -1.33077 | +0.74014 |
| H | +1.93988 | +0.87921 | +1.80479 |
| H | +1.30962 | +0.08845 | +3.21734 |
| H | -0.53613 | +0.87871 | +1.87348 |
| H | -0.55915 | -0.86336 | +1.88199 |
| H | -1.01060 | +0.08062 | -0.39319 |
| H | +0.57382 | +0.83982 | -0.38946 |
| H | +0.43219 | -0.91184 | -0.40712 |

\* E = +0.822 kcal/mol ; Conformer 005

|   |          |          |          |
|---|----------|----------|----------|
| C | +0.00000 | +0.00000 | +0.00000 |
| C | +0.00000 | +0.00000 | +1.51492 |
| C | +1.40032 | +0.00000 | +2.09742 |
| C | +1.41348 | -0.02192 | +3.61610 |
| C | +0.75558 | +1.16321 | +4.25516 |
| O | +1.07168 | +2.30420 | +3.64297 |
| C | +0.51259 | +3.47331 | +4.21364 |
| O | +0.04314 | +1.12313 | +5.22168 |
| H | +0.85938 | +4.29710 | +3.60330 |
| H | -0.57156 | +3.41899 | +4.20280 |
| H | +0.84610 | +3.59081 | +5.24000 |
| H | +0.91469 | -0.90372 | +4.00823 |
| H | +2.44081 | -0.04382 | +3.98075 |
| H | +1.94457 | -0.87229 | +1.73503 |
| H | +1.94141 | +0.87718 | +1.74574 |
| H | -0.53976 | +0.87583 | +1.87844 |
| H | -0.54466 | -0.87008 | +1.88421 |
| H | -1.01139 | +0.00117 | -0.39901 |
| H | +0.51161 | +0.87792 | -0.39051 |
| H | +0.50937 | -0.87883 | -0.39193 |

\* E = +0.995 kcal/mol ; Conformer 006

|   |          |          |          |
|---|----------|----------|----------|
| C | +0.00000 | +0.00000 | +0.00000 |
| C | +0.00000 | +0.00000 | +1.51512 |
| C | +1.39973 | +0.00000 | +2.09793 |
| C | +1.39047 | +0.00686 | +3.61897 |
| C | +2.76182 | +0.01139 | +4.21665 |
| O | +3.48359 | -1.03223 | +3.80737 |
| C | +4.79782 | -1.10327 | +4.32986 |
| O | +3.19088 | +0.83760 | +4.97601 |
| H | +5.23931 | -1.99450 | +3.90305 |
| H | +5.36599 | -0.22243 | +4.04765 |
| H | +4.77191 | -1.17061 | +5.41303 |

|   |          |          |          |
|---|----------|----------|----------|
| H | +0.87187 | +0.87938 | +4.00457 |
| H | +0.87140 | -0.88049 | +3.98222 |
| H | +1.94693 | -0.87389 | +1.74717 |
| H | +1.94260 | +0.87416 | +1.73537 |
| H | -0.54434 | +0.87121 | +1.88200 |
| H | -0.54106 | -0.87351 | +1.88221 |
| H | -1.01160 | -0.00200 | -0.39843 |
| H | +0.50810 | +0.87949 | -0.39152 |
| H | +0.51226 | -0.87704 | -0.39156 |

\* E = +1.102 kcal/mol ; Conformer 007

|   |          |          |          |
|---|----------|----------|----------|
| C | +0.00000 | +0.00000 | +0.00000 |
| C | +0.00000 | +0.00000 | +1.51653 |
| C | +1.38562 | +0.00000 | +2.14215 |
| C | +2.24188 | -1.18554 | +1.73222 |
| C | +2.95043 | -0.98237 | +0.42748 |
| O | +3.20325 | -2.13716 | -0.18580 |
| C | +3.92684 | -2.03315 | -1.39914 |
| O | +3.29421 | +0.07899 | -0.01874 |
| H | +4.04940 | -3.04648 | -1.75895 |
| H | +3.37527 | -1.43591 | -2.11847 |
| H | +4.89284 | -1.56906 | -1.22618 |
| H | +3.03054 | -1.35525 | +2.46641 |
| H | +1.66748 | -2.10861 | +1.68309 |
| H | +1.91537 | +0.91290 | +1.87277 |
| H | +1.28206 | +0.00012 | +3.22566 |
| H | -0.53965 | +0.87540 | +1.87691 |
| H | -0.55439 | -0.86790 | +1.87858 |
| H | -1.01209 | +0.08505 | -0.38873 |
| H | +0.58792 | +0.82637 | -0.39343 |
| H | +0.41959 | -0.92158 | -0.40195 |

\* E = +1.216 kcal/mol ; Conformer 008

|   |          |          |          |
|---|----------|----------|----------|
| C | +0.00000 | +0.00000 | +0.00000 |
| C | +0.00000 | +0.00000 | +1.51650 |
| C | +1.38965 | +0.00000 | +2.13248 |
| C | +2.25446 | -1.17658 | +1.69403 |
| C | +1.58141 | -2.49124 | +1.93406 |
| O | +1.29902 | -2.67362 | +3.22392 |
| C | +0.64433 | -3.88966 | +3.53659 |
| O | +1.30227 | -3.29849 | +1.08853 |
| H | +0.49072 | -3.87763 | +4.60787 |
| H | -0.30560 | -3.95385 | +3.01492 |
| H | +1.25941 | -4.73635 | +3.24812 |
| H | +2.48823 | -1.12819 | +0.63567 |
| H | +3.19195 | -1.16772 | +2.24744 |
| H | +1.90903 | +0.91985 | +1.86330 |
| H | +1.30467 | -0.01063 | +3.21738 |



|   |          |          |          |
|---|----------|----------|----------|
| H | -0.53925 | +0.87237 | +1.88425 |
| H | -0.55357 | -0.86849 | +1.87887 |
| H | -1.00992 | +0.09956 | -0.39009 |
| H | +0.58888 | +0.82849 | -0.39215 |
| H | +0.41165 | -0.92455 | -0.39896 |

\* E = +1.556 kcal/mol ; Conformer 009

|   |          |          |          |
|---|----------|----------|----------|
| C | +0.00000 | +0.00000 | +0.00000 |
| C | +0.00000 | +0.00000 | +1.51642 |
| C | +1.38852 | +0.00000 | +2.13309 |
| C | +2.19078 | -1.24921 | +1.79572 |
| C | +3.52034 | -1.28900 | +2.47918 |
| O | +4.25534 | -0.21359 | +2.19536 |
| C | +5.53385 | -0.17494 | +2.80287 |
| O | +3.90989 | -2.16762 | +3.20024 |
| H | +5.99037 | +0.75023 | +2.47563 |
| H | +5.44045 | -0.19375 | +3.88421 |
| H | +6.12876 | -1.02686 | +2.48848 |
| H | +1.65561 | -2.14871 | +2.08621 |
| H | +2.37296 | -1.29682 | +0.72278 |
| H | +1.94162 | +0.87734 | +1.80017 |
| H | +1.29790 | +0.08031 | +3.21624 |
| H | -0.53373 | +0.87990 | +1.87421 |
| H | -0.55810 | -0.86274 | +1.88317 |
| H | -1.01079 | +0.08579 | -0.39135 |
| H | +0.57813 | +0.83632 | -0.39042 |
| H | +0.42578 | -0.91469 | -0.40701 |

\* E = +1.593 kcal/mol ; Conformer 010

|   |          |          |          |
|---|----------|----------|----------|
| C | +0.00000 | +0.00000 | +0.00000 |
| C | +0.00000 | +0.00000 | +1.51643 |
| C | +1.38692 | +0.00000 | +2.13647 |
| C | +2.19299 | -1.24718 | +1.79861 |
| C | +3.52561 | -1.27448 | +2.47806 |
| O | +3.40553 | -1.25006 | +3.80567 |
| C | +4.62457 | -1.27035 | +4.52571 |
| O | +4.59167 | -1.31218 | +1.92518 |
| H | +4.35164 | -1.24635 | +5.57279 |
| H | +5.18465 | -2.17180 | +4.29722 |
| H | +5.23095 | -0.40741 | +4.26876 |
| H | +1.63727 | -2.13124 | +2.11293 |
| H | +2.38280 | -1.32622 | +0.73362 |
| H | +1.93396 | +0.88173 | +1.79894 |
| H | +1.30250 | +0.07736 | +3.21854 |
| H | -0.53548 | +0.87884 | +1.87428 |
| H | -0.55630 | -0.86404 | +1.88362 |
| H | -1.01111 | +0.08114 | -0.39150 |
| H | +0.57403 | +0.83924 | -0.39009 |

H +0.43167 -0.91170 -0.40703

\* E = +1.798 kcal/mol ; Conformer 011

C +0.00000 +0.00000 +0.00000  
C +0.00000 +0.00000 +1.51713  
C +1.38158 +0.00000 +2.15128  
C +2.20963 -1.24397 +1.86337  
C +2.77673 -1.34847 +0.48069  
O +3.27622 -0.19058 +0.05126  
C +3.85020 -0.22208 -1.24252  
O +2.82321 -2.35569 -0.17362  
H +4.21283 +0.78008 -1.43144  
H +4.66533 -0.93791 -1.27947  
H +3.10370 -0.50335 -1.97923  
H +3.06716 -1.26986 +2.53687  
H +1.64033 -2.15285 +2.03933  
H +1.93751 +0.87922 +1.82850  
H +1.26839 +0.08152 +3.23132  
H -0.53609 +0.87944 +1.87332  
H -0.56003 -0.86317 +1.88064  
H -1.01030 +0.11121 -0.38674  
H +0.59977 +0.82064 -0.39010  
H +0.39637 -0.92740 -0.40829

\* E = +8.065 kcal/mol ; Conformer 012

C +0.00000 +0.00000 +0.00000  
C +0.00000 +0.00000 +1.51486  
C +1.40277 +0.00000 +2.09241  
C +1.42425 +0.00179 +3.60708  
C +0.99137 +1.32241 +4.18674  
O +0.81837 +1.39566 +5.51326  
C +0.99137 +0.26856 +6.33988  
O +0.81977 +2.30767 +3.53003  
H +0.88354 +0.62924 +7.35526  
H +0.23057 -0.48546 +6.15032  
H +1.97893 -0.17142 +6.22353  
H +0.79351 -0.79573 +4.00070  
H +2.42946 -0.20207 +3.98037  
H +1.94077 -0.87952 +1.73802  
H +1.94253 +0.87412 +1.73201  
H -0.53332 +0.87552 +1.88112  
H -0.53841 -0.87679 +1.88069  
H -1.01188 -0.00852 -0.39768  
H +0.49980 +0.88561 -0.38764  
H +0.51889 -0.87220 -0.39515

\* E = +8.144 kcal/mol ; Conformer 013

C +0.00000 +0.00000 +0.00000

|   |          |          |          |
|---|----------|----------|----------|
| C | +0.00000 | +0.00000 | +1.51519 |
| C | +1.40035 | +0.00000 | +2.09568 |
| C | +1.39970 | +0.00001 | +3.60806 |
| C | +2.79105 | -0.00008 | +4.17813 |
| O | +2.91985 | +0.00054 | +5.51247 |
| C | +1.79319 | +0.00099 | +6.35702 |
| O | +3.77904 | -0.00066 | +3.50407 |
| H | +2.18268 | +0.00072 | +7.36744 |
| H | +1.18323 | +0.89001 | +6.21373 |
| H | +1.18239 | -0.88742 | +6.21359 |
| H | +0.86269 | +0.86923 | +3.99194 |
| H | +0.86266 | -0.86921 | +3.99190 |
| H | +1.95427 | -0.86774 | +1.74062 |
| H | +1.95427 | +0.86774 | +1.74059 |
| H | -0.54531 | +0.87233 | +1.87992 |
| H | -0.54531 | -0.87233 | +1.87992 |
| H | -1.01130 | -0.00000 | -0.39930 |
| H | +0.51143 | +0.87776 | -0.39057 |
| H | +0.51143 | -0.87776 | -0.39057 |

\* E = +8.726 kcal/mol ; Conformer 014

|   |          |          |          |
|---|----------|----------|----------|
| C | +0.00000 | +0.00000 | +0.00000 |
| C | +0.00000 | +0.00000 | +1.51692 |
| C | +1.38606 | +0.00000 | +2.13747 |
| C | +2.18656 | -1.24351 | +1.81458 |
| C | +3.51701 | -1.25467 | +2.51519 |
| O | +4.32002 | -2.30921 | +2.31396 |
| C | +3.93646 | -3.37284 | +1.47497 |
| O | +3.89052 | -0.37634 | +3.23601 |
| H | +4.75905 | -4.07677 | +1.49732 |
| H | +3.03817 | -3.86766 | +1.83714 |
| H | +3.78271 | -3.04176 | +0.45037 |
| H | +1.63173 | -2.13985 | +2.09926 |
| H | +2.36125 | -1.33326 | +0.74211 |
| H | +1.94404 | +0.87488 | +1.80601 |
| H | +1.31045 | +0.09112 | +3.21875 |
| H | -0.53409 | +0.88023 | +1.87247 |
| H | -0.56255 | -0.86102 | +1.88273 |
| H | -1.01004 | +0.08603 | -0.39327 |
| H | +0.57832 | +0.83661 | -0.38947 |
| H | +0.42634 | -0.91432 | -0.40849 |

\* E = +8.776 kcal/mol ; Conformer 015

|   |          |          |          |
|---|----------|----------|----------|
| C | +0.00000 | +0.00000 | +0.00000 |
| C | +0.00000 | +0.00000 | +1.51683 |
| C | +1.38890 | +0.00000 | +2.13532 |
| C | +2.20276 | -1.24518 | +1.84109 |
| C | +1.66728 | -2.46256 | +2.54641 |

|   |          |          |          |
|---|----------|----------|----------|
| O | +2.20391 | -3.65085 | +2.23698 |
| C | +3.21325 | -3.76945 | +1.26194 |
| O | +0.81052 | -2.41970 | +3.38052 |
| H | +3.52584 | -4.80601 | +1.28660 |
| H | +2.83683 | -3.53792 | +0.26791 |
| H | +4.06854 | -3.13630 | +1.48542 |
| H | +2.26096 | -1.43546 | +0.77042 |
| H | +3.23474 | -1.10923 | +2.16985 |
| H | +1.94497 | +0.86478 | +1.77176 |
| H | +1.30022 | +0.10429 | +3.21430 |
| H | -0.52699 | +0.88532 | +1.87067 |
| H | -0.55742 | -0.85522 | +1.89457 |
| H | -1.01212 | +0.07624 | -0.38989 |
| H | +0.56978 | +0.84041 | -0.39502 |
| H | +0.42938 | -0.91180 | -0.41162 |

\* E = +9.485 kcal/mol ; Conformer 016

|   |          |          |          |
|---|----------|----------|----------|
| C | +0.00000 | +0.00000 | +0.00000 |
| C | +0.00000 | +0.00000 | +1.51602 |
| C | +1.38310 | +0.00000 | +2.14815 |
| C | +2.23196 | -1.19807 | +1.75875 |
| C | +3.03423 | -0.97580 | +0.50299 |
| O | +3.63741 | -2.03879 | -0.04698 |
| C | +3.50007 | -3.32955 | +0.49960 |
| O | +3.19039 | +0.09626 | -0.00393 |
| H | +4.17390 | -3.96115 | -0.06599 |
| H | +3.78496 | -3.35797 | +1.54860 |
| H | +2.48546 | -3.70504 | +0.38579 |
| H | +2.95279 | -1.42969 | +2.54524 |
| H | +1.61351 | -2.08973 | +1.65398 |
| H | +1.91882 | +0.90563 | +1.87046 |
| H | +1.27121 | +0.01067 | +3.23089 |
| H | -0.53964 | +0.87569 | +1.87548 |
| H | -0.55615 | -0.86669 | +1.87995 |
| H | -1.01480 | +0.06105 | -0.38634 |
| H | +0.57055 | +0.83721 | -0.39363 |
| H | +0.44411 | -0.90799 | -0.40568 |

\* E = +9.744 kcal/mol ; Conformer 017

|   |          |          |          |
|---|----------|----------|----------|
| C | +0.00000 | +0.00000 | +0.00000 |
| C | +0.00000 | +0.00000 | +1.51507 |
| C | +1.39983 | +0.00000 | +2.09728 |
| C | +1.39397 | +0.01960 | +3.62254 |
| C | +2.79626 | +0.08753 | +4.16016 |
| O | +3.45453 | -1.05545 | +4.39758 |
| C | +2.82460 | -2.30939 | +4.27680 |
| O | +3.36588 | +1.12524 | +4.33580 |
| H | +3.60558 | -3.04593 | +4.42064 |

|   |          |          |          |
|---|----------|----------|----------|
| H | +2.06511 | -2.44601 | +5.04347 |
| H | +2.38324 | -2.44978 | +3.29311 |
| H | +0.89317 | +0.91845 | +3.96961 |
| H | +0.84680 | -0.83777 | +4.00758 |
| H | +1.94410 | -0.87326 | +1.73305 |
| H | +1.94849 | +0.87167 | +1.74201 |
| H | -0.53870 | +0.87407 | +1.88279 |
| H | -0.54496 | -0.87082 | +1.88294 |
| H | -1.01199 | +0.00259 | -0.39711 |
| H | +0.51176 | +0.87724 | -0.39101 |
| H | +0.50753 | -0.87925 | -0.39292 |

\* E = +9.924 kcal/mol ; Conformer 018

|   |          |          |          |
|---|----------|----------|----------|
| C | +0.00000 | +0.00000 | +0.00000 |
| C | +0.00000 | +0.00000 | +1.51578 |
| C | +1.39166 | +0.00000 | +2.12779 |
| C | +2.26856 | -1.18310 | +1.70956 |
| C | +1.60681 | -2.49583 | +2.02153 |
| O | +1.76926 | -3.03216 | +3.23850 |
| C | +2.67936 | -2.49154 | +4.16830 |
| O | +0.89279 | -3.05594 | +1.23975 |
| H | +2.54284 | -3.06205 | +5.07874 |
| H | +3.70615 | -2.60910 | +3.82904 |
| H | +2.47797 | -1.44354 | +4.37394 |
| H | +2.41534 | -1.16877 | +0.63433 |
| H | +3.24607 | -1.10138 | +2.17737 |
| H | +1.91467 | +0.91126 | +1.83683 |
| H | +1.30515 | +0.03073 | +3.21409 |
| H | -0.52589 | +0.88055 | +1.88396 |
| H | -0.55931 | -0.86414 | +1.87309 |
| H | -1.00790 | +0.12806 | -0.38665 |
| H | +0.61093 | +0.81141 | -0.39527 |
| H | +0.37965 | -0.94039 | -0.39140 |

\* E = +9.990 kcal/mol ; Conformer 019

|   |          |          |          |
|---|----------|----------|----------|
| C | +0.00000 | +0.00000 | +0.00000 |
| C | +0.00000 | +0.00000 | +1.51507 |
| C | +1.40525 | +0.00000 | +2.08629 |
| C | +1.44870 | -0.03974 | +3.61441 |
| C | +0.80833 | +1.17971 | +4.21676 |
| O | +1.55014 | +2.28552 | +4.37414 |
| C | +2.94478 | +2.27604 | +4.17475 |
| O | -0.35093 | +1.22178 | +4.51262 |
| H | +3.26503 | +3.30424 | +4.29027 |
| H | +3.44554 | +1.66485 | +4.92246 |
| H | +3.21333 | +1.93149 | +3.17959 |
| H | +0.87339 | -0.88931 | +3.97010 |
| H | +2.47298 | -0.16210 | +3.95683 |

|   |          |          |          |
|---|----------|----------|----------|
| H | +1.94723 | -0.86943 | +1.71371 |
| H | +1.94379 | +0.87424 | +1.71623 |
| H | -0.54968 | +0.86301 | +1.88712 |
| H | -0.53437 | -0.87496 | +1.88618 |
| H | -1.01276 | -0.00529 | -0.39481 |
| H | +0.50175 | +0.88275 | -0.39329 |
| H | +0.51401 | -0.87455 | -0.39594 |

\* E = +10.264 kcal/mol ; Conformer 020

|   |          |          |          |
|---|----------|----------|----------|
| C | +0.00000 | +0.00000 | +0.00000 |
| C | +0.00000 | +0.00000 | +1.51629 |
| C | +1.38718 | +0.00000 | +2.13493 |
| C | +2.18353 | -1.26519 | +1.82430 |
| C | +3.48965 | -1.25844 | +2.56830 |
| O | +4.56352 | -0.70835 | +1.98496 |
| C | +4.53014 | -0.25909 | +0.65037 |
| O | +3.59474 | -1.67968 | +3.68357 |
| H | +5.48225 | +0.22841 | +0.48025 |
| H | +4.43017 | -1.09043 | -0.04403 |
| H | +3.73039 | +0.45796 | +0.48200 |
| H | +1.63467 | -2.13116 | +2.18340 |
| H | +2.32777 | -1.37883 | +0.75355 |
| H | +1.93498 | +0.88011 | +1.79253 |
| H | +1.30557 | +0.08975 | +3.21664 |
| H | -0.53404 | +0.87936 | +1.87438 |
| H | -0.55551 | -0.86336 | +1.88462 |
| H | -1.01124 | +0.07668 | -0.39165 |
| H | +0.56836 | +0.84317 | -0.39096 |
| H | +0.43364 | -0.91073 | -0.40783 |

\* E = +10.323 kcal/mol ; Conformer 021

|   |          |          |          |
|---|----------|----------|----------|
| C | +0.00000 | +0.00000 | +0.00000 |
| C | +0.00000 | +0.00000 | +1.51620 |
| C | +1.38871 | +0.00000 | +2.13187 |
| C | +2.20719 | -1.23740 | +1.77024 |
| C | +3.55102 | -1.18925 | +2.44153 |
| O | +3.67984 | -1.71324 | +3.66864 |
| C | +2.62971 | -2.42298 | +4.28276 |
| O | +4.49837 | -0.65325 | +1.94416 |
| H | +2.96941 | -2.63918 | +5.28824 |
| H | +1.71724 | -1.83416 | +4.33687 |
| H | +2.43179 | -3.36056 | +3.76792 |
| H | +1.65340 | -2.13954 | +2.02177 |
| H | +2.40641 | -1.25225 | +0.70396 |
| H | +1.93930 | +0.88165 | +1.80485 |
| H | +1.30049 | +0.07940 | +3.21585 |
| H | -0.53262 | +0.88002 | +1.87512 |
| H | -0.55828 | -0.86301 | +1.88322 |

|   |          |          |          |
|---|----------|----------|----------|
| H | -1.01094 | +0.08807 | -0.39003 |
| H | +0.57980 | +0.83490 | -0.39009 |
| H | +0.42439 | -0.91506 | -0.40714 |

\* E = +11.690 kcal/mol ; Conformer 022

|   |          |          |          |
|---|----------|----------|----------|
| C | +0.00000 | +0.00000 | +0.00000 |
| C | +0.00000 | +0.00000 | +1.51790 |
| C | +1.39562 | +0.00000 | +2.13401 |
| C | +1.97467 | +1.39319 | +2.39749 |
| C | +1.92461 | +2.29419 | +1.19605 |
| O | +2.90179 | +2.21455 | +0.28260 |
| C | +4.06701 | +1.45710 | +0.51544 |
| O | +1.01632 | +3.04941 | +0.99853 |
| H | +4.63668 | +1.50320 | -0.40450 |
| H | +4.66047 | +1.88664 | +1.31957 |
| H | +3.84042 | +0.41853 | +0.73960 |
| H | +1.37035 | +1.88749 | +3.15192 |
| H | +2.98679 | +1.30535 | +2.78582 |
| H | +1.37817 | -0.51116 | +3.09499 |
| H | +2.06708 | -0.57912 | +1.49877 |
| H | -0.55680 | +0.86252 | +1.88417 |
| H | -0.53396 | -0.88302 | +1.86614 |
| H | -1.01617 | -0.00890 | -0.38676 |
| H | +0.49151 | +0.87664 | -0.41297 |
| H | +0.50687 | -0.88410 | -0.38469 |

\* E = +11.960 kcal/mol ; Conformer 023

|   |          |          |          |
|---|----------|----------|----------|
| C | +0.00000 | +0.00000 | +0.00000 |
| C | +0.00000 | +0.00000 | +1.51524 |
| C | +1.38974 | +0.00000 | +2.13029 |
| C | +2.20708 | -1.26068 | +1.79946 |
| C | +3.15203 | -1.06578 | +0.64660 |
| O | +4.25401 | -0.33026 | +0.86203 |
| C | +4.66894 | +0.01122 | +2.16478 |
| O | +2.95967 | -1.49836 | -0.45235 |
| H | +5.52596 | +0.66152 | +2.03935 |
| H | +3.89903 | +0.54263 | +2.71762 |
| H | +4.97539 | -0.87204 | +2.72142 |
| H | +2.76834 | -1.58593 | +2.67274 |
| H | +1.54518 | -2.07490 | +1.51980 |
| H | +1.92309 | +0.89117 | +1.79571 |
| H | +1.29780 | +0.08631 | +3.21173 |
| H | -0.53718 | +0.87445 | +1.88226 |
| H | -0.54687 | -0.86930 | +1.88400 |
| H | -1.01526 | +0.03309 | -0.38790 |
| H | +0.53205 | +0.86648 | -0.38994 |
| H | +0.48522 | -0.88444 | -0.40480 |

## S.2.2 (TS<sub>α'</sub>)<sup>‡</sup>

\* E = +0.000 kcal/mol ; Conformer 001

|   |          |          |          |
|---|----------|----------|----------|
| C | +0.00000 | +0.00000 | +0.00000 |
| C | +0.00000 | +0.00000 | +1.51490 |
| C | +1.40214 | +0.00000 | +2.09420 |
| C | +1.42355 | -0.00454 | +3.60808 |
| C | +0.95491 | +1.28635 | +4.20039 |
| O | +0.70913 | +1.15706 | +5.51628 |
| C | +0.33269 | +2.29902 | +6.19637 |
| O | +0.82126 | +2.32435 | +3.61732 |
| H | +1.44868 | +2.99575 | +6.46431 |
| H | -0.26498 | +2.98295 | +5.60758 |
| H | -0.06095 | +2.02383 | +7.16404 |
| H | +0.81861 | -0.81075 | +4.02045 |
| H | +2.43316 | -0.16577 | +3.98779 |
| H | +1.94308 | -0.87576 | +1.73593 |
| H | +1.94197 | +0.87550 | +1.73544 |
| H | -0.53557 | +0.87572 | +1.87966 |
| H | -0.53977 | -0.87505 | +1.88170 |
| H | -1.01165 | -0.00585 | -0.39836 |
| H | +0.50333 | +0.88329 | -0.38857 |
| H | +0.51619 | -0.87422 | -0.39385 |
| H | +2.25195 | +3.43301 | +6.63079 |

\* E = +0.001 kcal/mol ; Conformer 002

|   |          |          |          |
|---|----------|----------|----------|
| C | +0.00000 | +0.00000 | +0.00000 |
| C | +0.00000 | +0.00000 | +1.51487 |
| C | +1.40228 | +0.00000 | +2.09390 |
| C | +1.42329 | -0.00428 | +3.60791 |
| C | +0.95258 | +1.28650 | +4.19906 |
| O | +0.71301 | +1.16040 | +5.51625 |
| C | +0.29028 | +2.29317 | +6.18442 |
| O | +0.82180 | +2.32482 | +3.61584 |
| H | -1.02364 | +2.43467 | +5.94807 |
| H | +0.36321 | +2.12649 | +7.24930 |
| H | +0.72140 | +3.21176 | +5.80754 |
| H | +0.81655 | -0.80931 | +4.01975 |
| H | +2.43260 | -0.16727 | +3.98791 |
| H | +1.94335 | -0.87580 | +1.73586 |
| H | +1.94204 | +0.87551 | +1.73495 |
| H | -0.53597 | +0.87521 | +1.87994 |
| H | -0.53949 | -0.87512 | +1.88172 |
| H | -1.01177 | -0.00559 | -0.39800 |
| H | +0.50321 | +0.88335 | -0.38870 |
| H | +0.51595 | -0.87428 | -0.39414 |
| H | -1.93254 | +2.48020 | +5.75945 |

\* E = +0.111 kcal/mol ; Conformer 003



|   |          |          |          |
|---|----------|----------|----------|
| C | +0.00000 | +0.00000 | +0.00000 |
| C | +0.00000 | +0.00000 | +1.51508 |
| C | +1.39984 | +0.00000 | +2.09718 |
| C | +1.39515 | -0.00006 | +3.60906 |
| C | +2.76902 | -0.00559 | +4.19512 |
| O | +2.72310 | +0.01381 | +5.53985 |
| C | +3.93278 | -0.01441 | +6.20591 |
| O | +3.79858 | -0.02024 | +3.58365 |
| H | +4.34855 | -1.29035 | +6.23525 |
| H | +4.72955 | +0.50619 | +5.69029 |
| H | +3.77541 | +0.24868 | +7.24186 |
| H | +0.86889 | +0.86813 | +4.00688 |
| H | +0.86692 | -0.86774 | +4.00555 |
| H | +1.95168 | -0.86891 | +1.74040 |
| H | +1.95145 | +0.86887 | +1.73961 |
| H | -0.54488 | +0.87197 | +1.88066 |
| H | -0.54443 | -0.87223 | +1.88058 |
| H | -1.01144 | -0.00024 | -0.39892 |
| H | +0.51084 | +0.87801 | -0.39103 |
| H | +0.51122 | -0.87782 | -0.39088 |
| H | +4.58541 | -2.18955 | +6.23471 |

\* E = +0.671 kcal/mol ; Conformer 004

|   |          |          |          |
|---|----------|----------|----------|
| C | +0.00000 | +0.00000 | +0.00000 |
| C | +0.00000 | +0.00000 | +1.51677 |
| C | +1.38930 | +0.00000 | +2.13452 |
| C | +2.20565 | -1.24024 | +1.82913 |
| C | +1.65285 | -2.47142 | +2.47329 |
| O | +2.18336 | -3.58430 | +1.93553 |
| C | +1.76872 | -4.79099 | +2.46479 |
| O | +0.86315 | -2.50379 | +3.37377 |
| H | +0.57719 | -5.08197 | +1.91963 |
| H | +2.42832 | -5.57530 | +2.12296 |
| H | +1.56585 | -4.75789 | +3.52755 |
| H | +2.30244 | -1.42436 | +0.76164 |
| H | +3.22504 | -1.13083 | +2.20184 |
| H | +1.94297 | +0.86961 | +1.77995 |
| H | +1.30097 | +0.09705 | +3.21477 |
| H | -0.52989 | +0.88273 | +1.87280 |
| H | -0.55755 | -0.85741 | +1.89181 |
| H | -1.01230 | +0.07317 | -0.39003 |
| H | +0.56693 | +0.84293 | -0.39341 |
| H | +0.43427 | -0.90964 | -0.41021 |
| H | -0.24016 | -5.23771 | +1.50521 |

21

\* E = +0.680 kcal/mol ; Conformer 005

|   |          |          |          |
|---|----------|----------|----------|
| C | +0.00000 | +0.00000 | +0.00000 |
| C | +0.00000 | +0.00000 | +1.51678 |

|   |          |          |          |
|---|----------|----------|----------|
| C | +1.38915 | +0.00000 | +2.13470 |
| C | +2.20435 | -1.24159 | +1.83274 |
| C | +1.65432 | -2.47007 | +2.48426 |
| O | +2.18071 | -3.58495 | +1.94618 |
| C | +1.80676 | -4.78822 | +2.51238 |
| O | +0.86321 | -2.49892 | +3.38355 |
| H | +2.54717 | -4.96109 | +3.61885 |
| H | +0.78783 | -4.80317 | +2.87728 |
| H | +2.09670 | -5.59603 | +1.85627 |
| H | +2.30097 | -1.42972 | +0.76586 |
| H | +3.22403 | -1.13194 | +2.20438 |
| H | +1.94346 | +0.86837 | +1.77820 |
| H | +1.30079 | +0.09961 | +3.21467 |
| H | -0.53031 | +0.88257 | +1.87251 |
| H | -0.55753 | -0.85727 | +1.89245 |
| H | -1.01230 | +0.07104 | -0.39053 |
| H | +0.56505 | +0.84428 | -0.39308 |
| H | +0.43727 | -0.90816 | -0.41049 |
| H | +3.09083 | -5.03472 | +4.36940 |

\* E = +0.688 kcal/mol ; Conformer 006

|   |          |          |          |
|---|----------|----------|----------|
| C | +0.00000 | +0.00000 | +0.00000 |
| C | +0.00000 | +0.00000 | +1.51681 |
| C | +1.38709 | +0.00000 | +2.13552 |
| C | +2.18687 | -1.24155 | +1.80566 |
| C | +3.50494 | -1.28074 | +2.50749 |
| O | +4.20366 | -2.37900 | +2.16581 |
| C | +5.43363 | -2.54910 | +2.77068 |
| O | +3.92275 | -0.46252 | +3.27568 |
| H | +5.21605 | -3.06014 | +3.99268 |
| H | +5.98622 | -3.31453 | +2.24538 |
| H | +5.95786 | -1.62255 | +2.96674 |
| H | +1.64377 | -2.14671 | +2.08158 |
| H | +2.38359 | -1.33208 | +0.73823 |
| H | +1.93991 | +0.87908 | +1.80468 |
| H | +1.30952 | +0.08725 | +3.21741 |
| H | -0.53524 | +0.87902 | +1.87368 |
| H | -0.55942 | -0.86284 | +1.88247 |
| H | -1.01059 | +0.08196 | -0.39270 |
| H | +0.57463 | +0.83912 | -0.38972 |
| H | +0.43034 | -0.91252 | -0.40766 |
| H | +5.01002 | -3.42095 | +4.82461 |

\* E = +0.690 kcal/mol ; Conformer 007

|   |          |          |          |
|---|----------|----------|----------|
| C | +0.00000 | +0.00000 | +0.00000 |
| C | +0.00000 | +0.00000 | +1.51680 |
| C | +1.38718 | +0.00000 | +2.13535 |
| C | +2.18670 | -1.24182 | +1.80586 |

|   |          |          |          |
|---|----------|----------|----------|
| C | +3.50875 | -1.27638 | +2.50035 |
| O | +4.19186 | -2.39285 | +2.18741 |
| C | +5.44512 | -2.53560 | +2.75011 |
| O | +3.93783 | -0.44486 | +3.24779 |
| H | +6.30114 | -1.80138 | +2.02223 |
| H | +5.52883 | -2.11964 | +3.74597 |
| H | +5.77859 | -3.55535 | +2.62331 |
| H | +1.64485 | -2.14740 | +2.08265 |
| H | +2.38177 | -1.33220 | +0.73804 |
| H | +1.94073 | +0.87834 | +1.80412 |
| H | +1.30927 | +0.08831 | +3.21722 |
| H | -0.53507 | +0.87913 | +1.87363 |
| H | -0.55968 | -0.86274 | +1.88245 |
| H | -1.01063 | +0.08200 | -0.39261 |
| H | +0.57472 | +0.83901 | -0.38968 |
| H | +0.43032 | -0.91247 | -0.40774 |
| H | +6.85184 | -1.28444 | +1.47982 |

\* E = +0.741 kcal/mol ; Conformer 008

|   |          |          |          |
|---|----------|----------|----------|
| C | +0.00000 | +0.00000 | +0.00000 |
| C | +0.00000 | +0.00000 | +1.51481 |
| C | +1.40103 | +0.00000 | +2.09597 |
| C | +1.41594 | -0.03113 | +3.61608 |
| C | +0.71792 | +1.13190 | +4.24672 |
| O | +1.09589 | +2.29657 | +3.68652 |
| C | +0.49829 | +3.44394 | +4.16947 |
| O | -0.06743 | +1.07814 | +5.14948 |
| H | -0.70380 | +3.53929 | +3.58152 |
| H | +0.27052 | +3.40943 | +5.22705 |
| H | +1.04708 | +4.30662 | +3.82052 |
| H | +0.93761 | -0.92662 | +4.00177 |
| H | +2.44356 | -0.02517 | +3.97999 |
| H | +1.94834 | -0.86871 | +1.73013 |
| H | +1.94026 | +0.88026 | +1.74904 |
| H | -0.54176 | +0.87523 | +1.87759 |
| H | -0.54431 | -0.87006 | +1.88452 |
| H | -1.01173 | +0.00277 | -0.39776 |
| H | +0.51179 | +0.87772 | -0.39067 |
| H | +0.50801 | -0.87938 | -0.39248 |
| H | -1.51847 | +3.54915 | +3.13168 |

\* E = +0.832 kcal/mol ; Conformer 009

|   |          |          |          |
|---|----------|----------|----------|
| C | +0.00000 | +0.00000 | +0.00000 |
| C | +0.00000 | +0.00000 | +1.51489 |
| C | +1.40054 | +0.00000 | +2.09687 |
| C | +1.41508 | -0.02972 | +3.61612 |
| C | +0.74132 | +1.14180 | +4.25779 |
| O | +1.08716 | +2.29923 | +3.66366 |

|   |          |          |          |
|---|----------|----------|----------|
| C | +0.56578 | +3.45805 | +4.20465 |
| O | -0.00404 | +1.09794 | +5.19442 |
| H | +1.31200 | +3.77574 | +5.27442 |
| H | +0.71460 | +4.27375 | +3.51198 |
| H | -0.43124 | +3.34261 | +4.60996 |
| H | +0.92667 | -0.91903 | +4.00381 |
| H | +2.44285 | -0.03872 | +3.97996 |
| H | +1.94639 | -0.87002 | +1.73195 |
| H | +1.94141 | +0.87860 | +1.74837 |
| H | -0.54096 | +0.87542 | +1.87819 |
| H | -0.54456 | -0.87002 | +1.88428 |
| H | -1.01146 | +0.00225 | -0.39857 |
| H | +0.51246 | +0.87722 | -0.39089 |
| H | +0.50817 | -0.87951 | -0.39175 |
| H | +1.86504 | +3.95545 | +5.99960 |

\* E = +0.960 kcal/mol ; Conformer 010

|   |          |          |          |
|---|----------|----------|----------|
| C | +0.00000 | +0.00000 | +0.00000 |
| C | +0.00000 | +0.00000 | +1.51504 |
| C | +1.40037 | +0.00000 | +2.09638 |
| C | +1.39030 | -0.00696 | +3.61904 |
| C | +2.76584 | -0.01031 | +4.19974 |
| O | +3.43145 | +1.11632 | +3.88180 |
| C | +4.73615 | +1.21724 | +4.32283 |
| O | +3.25377 | -0.88088 | +4.86231 |
| H | +5.50457 | +0.52515 | +3.46796 |
| H | +5.06775 | +2.24081 | +4.22512 |
| H | +4.91440 | +0.73991 | +5.27785 |
| H | +0.86887 | +0.87827 | +3.98240 |
| H | +0.87924 | -0.88512 | +4.00137 |
| H | +1.94388 | -0.87370 | +1.73485 |
| H | +1.94590 | +0.87518 | +1.74572 |
| H | -0.54080 | +0.87345 | +1.88245 |
| H | -0.54334 | -0.87167 | +1.88210 |
| H | -1.01186 | +0.00201 | -0.39767 |
| H | +0.51196 | +0.87708 | -0.39169 |
| H | +0.50790 | -0.87946 | -0.39157 |
| H | +5.98958 | +0.04031 | +2.83935 |

\* E = +0.979 kcal/mol ; Conformer 011

|   |          |          |          |
|---|----------|----------|----------|
| C | +0.00000 | +0.00000 | +0.00000 |
| C | +0.00000 | +0.00000 | +1.51502 |
| C | +1.40016 | +0.00000 | +2.09700 |
| C | +1.38938 | +0.00671 | +3.61880 |
| C | +2.75900 | +0.01550 | +4.21396 |
| O | +3.46886 | -1.05974 | +3.82314 |
| C | +4.75094 | -1.17654 | +4.32288 |
| O | +3.20936 | +0.85349 | +4.94190 |

|   |          |          |          |
|---|----------|----------|----------|
| H | +4.65691 | -1.67993 | +5.56358 |
| H | +5.28623 | -1.92747 | +3.76001 |
| H | +5.25381 | -0.22874 | +4.46573 |
| H | +0.87001 | +0.87905 | +4.00333 |
| H | +0.87304 | -0.88191 | +3.98222 |
| H | +1.94625 | -0.87449 | +1.74578 |
| H | +1.94278 | +0.87437 | +1.73504 |
| H | -0.54364 | +0.87148 | +1.88205 |
| H | -0.54075 | -0.87347 | +1.88237 |
| H | -1.01181 | -0.00171 | -0.39773 |
| H | +0.50802 | +0.87942 | -0.39168 |
| H | +0.51158 | -0.87730 | -0.39174 |
| H | +4.53728 | -2.03820 | +6.41321 |

\* E = +1.016 kcal/mol ; Conformer 012

|   |          |          |          |
|---|----------|----------|----------|
| C | +0.00000 | +0.00000 | +0.00000 |
| C | +0.00000 | +0.00000 | +1.51662 |
| C | +1.38466 | +0.00000 | +2.14458 |
| C | +2.24093 | -1.18663 | +1.73521 |
| C | +2.92876 | -0.98599 | +0.42195 |
| O | +3.13658 | -2.15358 | -0.21208 |
| C | +3.78106 | -2.08995 | -1.43244 |
| O | +3.29606 | +0.06358 | -0.02425 |
| H | +2.86841 | -1.70688 | -2.34040 |
| H | +4.54105 | -1.32134 | -1.48923 |
| H | +4.07521 | -3.08509 | -1.73258 |
| H | +3.03881 | -1.34610 | +2.46187 |
| H | +1.66854 | -2.11117 | +1.69846 |
| H | +1.91528 | +0.91300 | +1.87732 |
| H | +1.28100 | -0.00148 | +3.22797 |
| H | -0.53884 | +0.87578 | +1.87715 |
| H | -0.55522 | -0.86717 | +1.87902 |
| H | -1.01188 | +0.09050 | -0.38777 |
| H | +0.59065 | +0.82366 | -0.39515 |
| H | +0.41319 | -0.92269 | -0.40582 |
| H | +2.18792 | -1.44537 | -2.91639 |

\* E = +1.057 kcal/mol ; Conformer 013

|   |          |          |          |
|---|----------|----------|----------|
| C | +0.00000 | +0.00000 | +0.00000 |
| C | +0.00000 | +0.00000 | +1.51641 |
| C | +1.39013 | +0.00000 | +2.13159 |
| C | +2.25566 | -1.17845 | +1.69461 |
| C | +1.57081 | -2.48486 | +1.92852 |
| O | +1.32209 | -2.67850 | +3.23753 |
| C | +0.62606 | -3.82180 | +3.57713 |
| O | +1.25002 | -3.27693 | +1.08844 |
| H | -0.67142 | -3.57822 | +3.33740 |
| H | +0.85084 | -4.67564 | +2.95099 |

|   |          |          |          |
|---|----------|----------|----------|
| H | +0.68922 | -3.97482 | +4.64467 |
| H | +2.49198 | -1.12937 | +0.63696 |
| H | +3.19020 | -1.17380 | +2.25279 |
| H | +1.91188 | +0.91765 | +1.86006 |
| H | +1.30670 | -0.00806 | +3.21664 |
| H | -0.53692 | +0.87365 | +1.88420 |
| H | -0.55609 | -0.86680 | +1.87906 |
| H | -1.01007 | +0.10039 | -0.38914 |
| H | +0.58963 | +0.82770 | -0.39280 |
| H | +0.40931 | -0.92548 | -0.39930 |
| H | -1.55223 | -3.33944 | +3.15509 |

\* E = +1.125 kcal/mol ; Conformer 014

|   |          |          |          |
|---|----------|----------|----------|
| C | +0.00000 | +0.00000 | +0.00000 |
| C | +0.00000 | +0.00000 | +1.51640 |
| C | +1.38529 | +0.00000 | +2.14286 |
| C | +2.24007 | +1.18755 | +1.73627 |
| C | +2.95926 | +0.98493 | +0.44013 |
| O | +3.24959 | +2.15912 | -0.14808 |
| C | +3.99109 | +2.10656 | -1.31261 |
| O | +3.28159 | -0.06897 | -0.02951 |
| H | +5.27826 | +1.94811 | -0.96423 |
| H | +3.78047 | +1.24112 | -1.92761 |
| H | +3.95307 | +3.06861 | -1.80261 |
| H | +1.66337 | +2.10891 | +1.68014 |
| H | +3.02320 | +1.36486 | +2.47482 |
| H | +1.28152 | -0.00124 | +3.22619 |
| H | +1.91564 | -0.91246 | +1.87344 |
| H | -0.55479 | +0.86747 | +1.87875 |
| H | -0.53928 | -0.87556 | +1.87661 |
| H | -1.01227 | -0.08265 | -0.38853 |
| H | +0.42128 | +0.92050 | -0.40276 |
| H | +0.58571 | -0.82769 | -0.39385 |
| H | +6.15343 | +1.84731 | -0.66820 |

\* E = +1.210 kcal/mol ; Conformer 015

|   |          |          |          |
|---|----------|----------|----------|
| C | +0.00000 | +0.00000 | +0.00000 |
| C | +0.00000 | +0.00000 | +1.51648 |
| C | +1.38945 | +0.00000 | +2.13276 |
| C | +2.25398 | -1.17851 | +1.69772 |
| C | +1.58461 | -2.49164 | +1.94176 |
| O | +1.29448 | -2.65709 | +3.24583 |
| C | +0.67848 | -3.84014 | +3.60379 |
| O | +1.30678 | -3.30977 | +1.11146 |
| H | +1.63064 | -4.78224 | +3.68804 |
| H | +0.28922 | -3.75038 | +4.60761 |
| H | -0.00049 | -4.22540 | +2.85390 |
| H | +2.48750 | -1.13480 | +0.63922 |

|   |          |          |          |
|---|----------|----------|----------|
| H | +3.19177 | -1.16897 | +2.25074 |
| H | +1.91088 | +0.91755 | +1.86027 |
| H | +1.30529 | -0.00594 | +3.21775 |
| H | -0.53826 | +0.87305 | +1.88374 |
| H | -0.55505 | -0.86737 | +1.87939 |
| H | -1.00995 | +0.09960 | -0.38975 |
| H | +0.58866 | +0.82857 | -0.39209 |
| H | +0.41136 | -0.92411 | -0.40038 |
| H | +2.32898 | -5.39377 | +3.74077 |

\* E = +1.512 kcal/mol ; Conformer 016

|   |          |          |          |
|---|----------|----------|----------|
| C | +0.00000 | +0.00000 | +0.00000 |
| C | +0.00000 | +0.00000 | +1.51631 |
| C | +1.38811 | +0.00000 | +2.13376 |
| C | +2.18964 | -1.25145 | +1.79520 |
| C | +3.51391 | -1.27552 | +2.48337 |
| O | +4.29403 | -0.25701 | +2.07367 |
| C | +5.53396 | -0.14030 | +2.67011 |
| O | +3.87420 | -2.07331 | +3.30119 |
| H | +5.35689 | +0.47362 | +3.84990 |
| H | +5.98416 | -1.08831 | +2.93519 |
| H | +6.14445 | +0.53997 | +2.09413 |
| H | +1.65556 | -2.14793 | +2.09615 |
| H | +2.36822 | -1.30112 | +0.72232 |
| H | +1.94144 | +0.87681 | +1.79920 |
| H | +1.29852 | +0.07956 | +3.21672 |
| H | -0.53247 | +0.88039 | +1.87447 |
| H | -0.55855 | -0.86201 | +1.88384 |
| H | -1.01086 | +0.08651 | -0.39079 |
| H | +0.57835 | +0.83602 | -0.39066 |
| H | +0.42459 | -0.91500 | -0.40765 |
| H | +5.17727 | +0.91041 | +4.65146 |

\* E = +1.532 kcal/mol ; Conformer 017

|   |          |          |          |
|---|----------|----------|----------|
| C | +0.00000 | +0.00000 | +0.00000 |
| C | +0.00000 | +0.00000 | +1.51633 |
| C | +1.38847 | +0.00000 | +2.13317 |
| C | +2.18964 | -1.25036 | +1.79340 |
| C | +3.51615 | -1.28849 | +2.47711 |
| O | +4.26861 | -0.22308 | +2.14277 |
| C | +5.53091 | -0.15142 | +2.69814 |
| O | +3.89787 | -2.13230 | +3.23697 |
| H | +6.33455 | -0.95136 | +1.98011 |
| H | +5.92899 | +0.84233 | +2.55234 |
| H | +5.59246 | -0.55523 | +3.70052 |
| H | +1.65424 | -2.14890 | +2.08586 |
| H | +2.37163 | -1.29696 | +0.72063 |
| H | +1.94104 | +0.87754 | +1.79952 |

|   |          |          |          |
|---|----------|----------|----------|
| H | +1.29829 | +0.07892 | +3.21634 |
| H | -0.53284 | +0.88016 | +1.87454 |
| H | -0.55819 | -0.86232 | +1.88369 |
| H | -1.01088 | +0.08635 | -0.39075 |
| H | +0.57823 | +0.83605 | -0.39075 |
| H | +0.42475 | -0.91492 | -0.40756 |
| H | +6.84957 | -1.51096 | +1.44501 |

\* E = +1.539 kcal/mol ; Conformer 018

|   |          |          |          |
|---|----------|----------|----------|
| C | +0.00000 | +0.00000 | +0.00000 |
| C | +0.00000 | +0.00000 | +1.51634 |
| C | +1.38704 | +0.00000 | +2.13594 |
| C | +2.19349 | -1.24731 | +1.79181 |
| C | +3.51932 | -1.26175 | +2.47823 |
| O | +3.37621 | -1.37951 | +3.81226 |
| C | +4.53052 | -1.35410 | +4.56958 |
| O | +4.59164 | -1.17422 | +1.95142 |
| H | +4.88003 | -0.06854 | +4.72744 |
| H | +4.31057 | -1.70442 | +5.56765 |
| H | +5.38681 | -1.79834 | +4.07856 |
| H | +1.63743 | -2.13289 | +2.09907 |
| H | +2.38881 | -1.31368 | +0.72705 |
| H | +1.93467 | +0.88207 | +1.80163 |
| H | +1.30185 | +0.07293 | +3.21850 |
| H | -0.53386 | +0.87951 | +1.87463 |
| H | -0.55687 | -0.86334 | +1.88410 |
| H | -1.01108 | +0.08314 | -0.39096 |
| H | +0.57551 | +0.83803 | -0.39033 |
| H | +0.42917 | -0.91280 | -0.40736 |
| H | +5.06961 | +0.83841 | +4.81329 |

\* E = +1.598 kcal/mol ; Conformer 019

|   |          |          |          |
|---|----------|----------|----------|
| C | +0.00000 | +0.00000 | +0.00000 |
| C | +0.00000 | +0.00000 | +1.51681 |
| C | +1.38153 | +0.00000 | +2.15100 |
| C | +2.20163 | -1.25478 | +1.88590 |
| C | +2.75378 | -1.39979 | +0.50342 |
| O | +3.27306 | -0.24501 | +0.04816 |
| C | +3.82154 | -0.26754 | -1.21900 |
| O | +2.78771 | -2.41403 | -0.13412 |
| H | +2.80961 | -0.19454 | -2.10139 |
| H | +4.39215 | +0.63621 | -1.37651 |
| H | +4.31199 | -1.19956 | -1.46895 |
| H | +3.06556 | -1.26735 | +2.55193 |
| H | +1.62988 | -2.15604 | +2.08990 |
| H | +1.94323 | +0.87076 | +1.81549 |
| H | +1.27074 | +0.09785 | +3.22985 |
| H | -0.53394 | +0.88077 | +1.87283 |



|   |          |          |          |
|---|----------|----------|----------|
| H | -0.56124 | -0.86147 | +1.88248 |
| H | -1.01010 | +0.11217 | -0.38684 |
| H | +0.59955 | +0.81949 | -0.39254 |
| H | +0.39512 | -0.92584 | -0.41275 |
| H | +2.08224 | -0.13604 | -2.67673 |

\* E = +1.829 kcal/mol ; Conformer 020

|   |          |          |          |
|---|----------|----------|----------|
| C | +0.00000 | +0.00000 | +0.00000 |
| C | +0.00000 | +0.00000 | +1.51698 |
| C | +1.38172 | +0.00000 | +2.15037 |
| C | +2.20925 | -1.24554 | +1.86581 |
| C | +2.77616 | -1.35892 | +0.48627 |
| O | +3.28519 | -0.18994 | +0.05733 |
| C | +3.88402 | -0.19104 | -1.18688 |
| O | +2.82107 | -2.35922 | -0.17229 |
| H | +5.12231 | -0.68926 | -1.04079 |
| H | +3.41782 | -0.86203 | -1.89687 |
| H | +4.03345 | +0.82853 | -1.51170 |
| H | +3.06817 | -1.26849 | +2.53785 |
| H | +1.64055 | -2.15381 | +2.04614 |
| H | +1.93802 | +0.87897 | +1.82754 |
| H | +1.27013 | +0.08228 | +3.23038 |
| H | -0.53510 | +0.87980 | +1.87346 |
| H | -0.56036 | -0.86262 | +1.88099 |
| H | -1.00996 | +0.11301 | -0.38683 |
| H | +0.60045 | +0.81987 | -0.39076 |
| H | +0.39414 | -0.92803 | -0.40889 |
| H | +5.97258 | -1.03057 | -0.88553 |

\* E = +6.868 kcal/mol ; Conformer 021

|   |          |          |          |
|---|----------|----------|----------|
| C | +0.00000 | +0.00000 | +0.00000 |
| C | +0.00000 | +0.00000 | +1.51481 |
| C | +1.40316 | +0.00000 | +2.09148 |
| C | +1.42378 | -0.00007 | +3.60657 |
| C | +0.98168 | +1.31632 | +4.18103 |
| O | +0.76076 | +1.37569 | +5.51371 |
| C | +0.92677 | +0.28079 | +6.32768 |
| O | +0.83446 | +2.31409 | +3.54303 |
| H | -0.06221 | -0.58661 | +6.11448 |
| H | +1.83385 | -0.29023 | +6.15723 |
| H | +0.78361 | +0.58463 | +7.35527 |
| H | +0.79737 | -0.79913 | +4.00237 |
| H | +2.43227 | -0.19236 | +3.97857 |
| H | +1.94055 | -0.88025 | +1.73865 |
| H | +1.94473 | +0.87273 | +1.73031 |
| H | -0.53450 | +0.87540 | +1.88023 |
| H | -0.53855 | -0.87572 | +1.88178 |
| H | -1.01204 | -0.00784 | -0.39709 |

|   |          |          |          |
|---|----------|----------|----------|
| H | +0.50049 | +0.88491 | -0.38840 |
| H | +0.51766 | -0.87294 | -0.39495 |
| H | -0.77680 | -1.17473 | +5.93101 |

\* E = +6.987 kcal/mol ; Conformer 022

|   |          |          |          |
|---|----------|----------|----------|
| C | +0.00000 | +0.00000 | +0.00000 |
| C | +0.00000 | +0.00000 | +1.51515 |
| C | +1.40072 | +0.00000 | +2.09478 |
| C | +1.39807 | -0.00283 | +3.60768 |
| C | +2.78752 | +0.01153 | +4.17434 |
| O | +2.91845 | -0.10170 | +5.51615 |
| C | +1.82973 | -0.24364 | +6.34254 |
| O | +3.77882 | +0.12329 | +3.52003 |
| H | +1.31121 | -1.46182 | +6.19043 |
| H | +2.16701 | -0.23495 | +7.36964 |
| H | +1.00377 | +0.43143 | +6.14266 |
| H | +0.86426 | +0.87114 | +3.98792 |
| H | +0.86387 | -0.87047 | +3.99597 |
| H | +1.95255 | -0.86897 | +1.73861 |
| H | +1.95474 | +0.86786 | +1.74086 |
| H | -0.54426 | +0.87290 | +1.87999 |
| H | -0.54514 | -0.87189 | +1.88049 |
| H | -1.01148 | +0.00046 | -0.39864 |
| H | +0.51163 | +0.87749 | -0.39089 |
| H | +0.51041 | -0.87828 | -0.39068 |
| H | +0.97301 | -2.33193 | +6.05197 |

\* E = +7.074 kcal/mol ; Conformer 023

|   |          |          |          |
|---|----------|----------|----------|
| C | +0.00000 | +0.00000 | +0.00000 |
| C | +0.00000 | +0.00000 | +1.51478 |
| C | +1.40311 | +0.00000 | +2.09177 |
| C | +1.43016 | +0.00292 | +3.60691 |
| C | +1.04359 | +1.33451 | +4.18480 |
| O | +1.01592 | +1.44676 | +5.53262 |
| C | +1.34185 | +0.39971 | +6.36103 |
| O | +0.77279 | +2.29962 | +3.53728 |
| H | +2.65153 | +0.15784 | +6.28196 |
| H | +1.20086 | +0.71002 | +7.38698 |
| H | +0.87418 | -0.54903 | +6.11868 |
| H | +0.75691 | -0.76228 | +3.99739 |
| H | +2.42051 | -0.24874 | +3.98717 |
| H | +1.93869 | -0.88155 | +1.73939 |
| H | +1.94621 | +0.87042 | +1.72674 |
| H | -0.53524 | +0.87394 | +1.88129 |
| H | -0.53665 | -0.87788 | +1.88048 |
| H | -1.01197 | -0.01039 | -0.39725 |
| H | +0.49791 | +0.88649 | -0.38810 |
| H | +0.52029 | -0.87124 | -0.39534 |

H +3.58002 +0.01778 +6.20108

\* E = +7.420 kcal/mol ; Conformer 024

C +0.00000 +0.00000 +0.00000  
C +0.00000 +0.00000 +1.51697  
C +1.38902 +0.00000 +2.13540  
C +2.21476 -1.22745 +1.80080  
C +1.67300 -2.47076 +2.44736  
O +2.16729 -3.66001 +2.03360  
C +3.12647 -3.74575 +1.05348  
O +0.85465 -2.47584 +3.31601  
H +2.57884 -3.45190 -0.12487  
H +3.95418 -3.05073 +1.15297  
H +3.42735 -4.77874 +0.94779  
H +2.28854 -1.37228 +0.72503  
H +3.23983 -1.10253 +2.15651  
H +1.93635 +0.87880 +1.79364  
H +1.30180 +0.07517 +3.21694  
H -0.52718 +0.88410 +1.87346  
H -0.55770 -0.85626 +1.89274  
H -1.01162 +0.08763 -0.38864  
H +0.57819 +0.83479 -0.39483  
H +0.41922 -0.91630 -0.41198  
H +2.14552 -3.22858 -0.93361

\* E = +7.538 kcal/mol ; Conformer 025

C +0.00000 +0.00000 +0.00000  
C +0.00000 +0.00000 +1.51692  
C +1.38624 +0.00000 +2.13714  
C +2.18467 -1.24443 +1.81067  
C +3.51177 -1.25732 +2.51126  
O +4.36425 -2.26651 +2.21823  
C +4.04657 -3.24377 +1.30605  
O +3.85960 -0.44242 +3.31017  
H +4.07006 -2.73068 +0.07630  
H +4.83858 -3.97952 +1.29194  
H +3.05201 -3.66663 +1.40598  
H +1.63062 -2.13789 +2.10912  
H +2.35504 -1.34169 +0.73918  
H +1.94341 +0.87447 +1.80245  
H +1.31208 +0.09103 +3.21836  
H -0.53349 +0.88019 +1.87325  
H -0.56212 -0.86096 +1.88350  
H -1.01040 +0.08492 -0.39244  
H +0.57699 +0.83738 -0.38958  
H +0.42770 -0.91313 -0.40936  
H +4.09383 -2.32905 -0.77752

\* E = +7.554 kcal/mol ; Conformer 026

|   |          |          |          |
|---|----------|----------|----------|
| C | +0.00000 | +0.00000 | +0.00000 |
| C | +0.00000 | +0.00000 | +1.51687 |
| C | +1.38638 | +0.00000 | +2.13671 |
| C | +2.18378 | -1.24607 | +1.81322 |
| C | +3.51895 | -1.24678 | +2.49793 |
| O | +4.28025 | -2.35976 | +2.38568 |
| C | +3.85538 | -3.46283 | +1.68518 |
| O | +3.95343 | -0.32994 | +3.12564 |
| H | +2.88519 | -4.07494 | +2.36341 |
| H | +3.41986 | -3.25604 | +0.71282 |
| H | +4.65307 | -4.19226 | +1.66429 |
| H | +1.63541 | -2.14456 | +2.09937 |
| H | +2.35739 | -1.32966 | +0.73901 |
| H | +1.94524 | +0.87387 | +1.80491 |
| H | +1.30908 | +0.09057 | +3.21821 |
| H | -0.53270 | +0.88091 | +1.87259 |
| H | -0.56260 | -0.86044 | +1.88320 |
| H | -1.01006 | +0.08819 | -0.39253 |
| H | +0.57988 | +0.83527 | -0.39002 |
| H | +0.42319 | -0.91562 | -0.40888 |
| H | +2.20006 | -4.47728 | +2.87268 |

\* E = +7.801 kcal/mol ; Conformer 027

|   |          |          |          |
|---|----------|----------|----------|
| C | +0.00000 | +0.00000 | +0.00000 |
| C | +0.00000 | +0.00000 | +1.51684 |
| C | +1.38952 | +0.00000 | +2.13461 |
| C | +2.20420 | -1.24774 | +1.85120 |
| C | +1.69697 | -2.44709 | +2.59907 |
| O | +2.34330 | -3.62082 | +2.41044 |
| C | +3.44149 | -3.72836 | +1.59145 |
| O | +0.77352 | -2.43288 | +3.35488 |
| H | +4.47793 | -3.10128 | +2.15016 |
| H | +3.75422 | -4.76281 | +1.56162 |
| H | +3.34030 | -3.26959 | +0.61325 |
| H | +2.21373 | -1.47169 | +0.78433 |
| H | +3.24847 | -1.10181 | +2.12886 |
| H | +1.94738 | +0.85953 | +1.76213 |
| H | +1.30376 | +0.11742 | +3.21272 |
| H | -0.52467 | +0.88697 | +1.86989 |
| H | -0.55938 | -0.85350 | +1.89474 |
| H | -1.01237 | +0.07622 | -0.38914 |
| H | +0.56925 | +0.84061 | -0.39513 |
| H | +0.42861 | -0.91166 | -0.41278 |
| H | +5.18669 | -2.65007 | +2.57751 |

\* E = +8.173 kcal/mol ; Conformer 028

|   |          |          |          |
|---|----------|----------|----------|
| C | +0.00000 | +0.00000 | +0.00000 |
|---|----------|----------|----------|

|   |          |          |          |
|---|----------|----------|----------|
| C | +0.00000 | +0.00000 | +1.51614 |
| C | +1.38393 | +0.00000 | +2.14668 |
| C | +2.23513 | +1.18906 | +1.73360 |
| C | +3.01563 | +0.94057 | +0.47236 |
| O | +3.56492 | +2.01099 | -0.14589 |
| C | +3.41739 | +3.28811 | +0.33937 |
| O | +3.21255 | -0.13791 | +0.00148 |
| H | +2.16588 | +3.69320 | +0.13141 |
| H | +3.57094 | +3.39870 | +1.40813 |
| H | +4.01043 | +3.96144 | -0.26376 |
| H | +1.62105 | +2.08208 | +1.62431 |
| H | +2.97173 | +1.42096 | +2.50599 |
| H | +1.27585 | +0.00881 | +3.22961 |
| H | +1.91427 | -0.91324 | +1.88400 |
| H | -0.55465 | +0.86795 | +1.87841 |
| H | -0.53965 | -0.87490 | +1.87730 |
| H | -1.01436 | -0.06777 | -0.38592 |
| H | +0.43423 | +0.91357 | -0.40479 |
| H | +0.57460 | -0.83413 | -0.39508 |
| H | +1.26604 | +3.92538 | -0.03540 |

\* E = +8.513 kcal/mol ; Conformer 029

|   |          |          |          |
|---|----------|----------|----------|
| C | +0.00000 | +0.00000 | +0.00000 |
| C | +0.00000 | +0.00000 | +1.51501 |
| C | +1.40027 | +0.00000 | +2.09633 |
| C | +1.39208 | -0.01651 | +3.62209 |
| C | +2.78894 | -0.08505 | +4.16581 |
| O | +3.44257 | +1.07146 | +4.42012 |
| C | +2.85188 | +2.29962 | +4.24359 |
| O | +3.37277 | -1.11035 | +4.34726 |
| H | +1.92763 | +2.48497 | +5.18482 |
| H | +3.58313 | +3.07073 | +4.44246 |
| H | +2.31852 | +2.42702 | +3.30694 |
| H | +0.84666 | +0.83919 | +4.01228 |
| H | +0.89207 | -0.91582 | +3.96912 |
| H | +1.94822 | -0.87250 | +1.74208 |
| H | +1.94466 | +0.87209 | +1.72901 |
| H | -0.54462 | +0.87060 | +1.88339 |
| H | -0.53827 | -0.87410 | +1.88306 |
| H | -1.01217 | -0.00298 | -0.39644 |
| H | +0.50668 | +0.87962 | -0.39314 |
| H | +0.51179 | -0.87705 | -0.39138 |
| H | +1.27641 | +2.56872 | +5.86211 |

\* E = +8.579 kcal/mol ; Conformer 030

|   |          |          |          |
|---|----------|----------|----------|
| C | +0.00000 | +0.00000 | +0.00000 |
| C | +0.00000 | +0.00000 | +1.51583 |
| C | +1.38298 | +0.00000 | +2.14841 |

|   |          |          |          |
|---|----------|----------|----------|
| C | +2.22946 | +1.20441 | +1.76992 |
| C | +3.07996 | +0.97290 | +0.55297 |
| O | +3.82436 | +2.01178 | +0.10752 |
| C | +3.83085 | +3.23463 | +0.73442 |
| O | +3.16222 | -0.06304 | -0.03284 |
| H | +4.44311 | +3.13045 | +1.91567 |
| H | +4.46688 | +3.90797 | +0.17681 |
| H | +2.85373 | +3.64434 | +0.96871 |
| H | +1.59456 | +2.07636 | +1.60279 |
| H | +2.90432 | +1.48401 | +2.57940 |
| H | +1.27116 | -0.01743 | +3.23080 |
| H | +1.91932 | -0.90410 | +1.86669 |
| H | -0.55507 | +0.86726 | +1.88005 |
| H | -0.54049 | -0.87491 | +1.87570 |
| H | -1.01558 | -0.04579 | -0.38625 |
| H | +0.45898 | +0.90062 | -0.40538 |
| H | +0.55763 | -0.84573 | -0.39375 |
| H | +4.88492 | +3.02149 | +2.74087 |

\* E = +8.718 kcal/mol ; Conformer 031

|   |          |          |          |
|---|----------|----------|----------|
| C | +0.00000 | +0.00000 | +0.00000 |
| C | +0.00000 | +0.00000 | +1.51581 |
| C | +1.39155 | +0.00000 | +2.12813 |
| C | +2.26989 | +1.18193 | +1.70867 |
| C | +1.61395 | +2.49558 | +2.01579 |
| O | +1.79918 | +3.04536 | +3.23715 |
| C | +2.64228 | +2.48973 | +4.16987 |
| O | +0.89483 | +3.06468 | +1.24996 |
| H | +3.90317 | +2.64002 | +3.76647 |
| H | +2.58859 | +3.07156 | +5.07949 |
| H | +2.52906 | +1.42129 | +4.32039 |
| H | +3.24944 | +1.10696 | +2.17260 |
| H | +2.41365 | +1.16665 | +0.63306 |
| H | +1.30448 | -0.03243 | +3.21443 |
| H | +1.91534 | -0.91047 | +1.83694 |
| H | -0.56066 | +0.86321 | +1.87365 |
| H | -0.52555 | -0.88076 | +1.88363 |
| H | -1.00788 | -0.12829 | -0.38642 |
| H | +0.37949 | +0.93977 | -0.39307 |
| H | +0.61088 | -0.81143 | -0.39503 |
| H | +4.77755 | +2.75905 | +3.43427 |

\* E = +8.737 kcal/mol ; Conformer 032

|   |          |          |          |
|---|----------|----------|----------|
| C | +0.00000 | +0.00000 | +0.00000 |
| C | +0.00000 | +0.00000 | +1.51503 |
| C | +1.40501 | +0.00000 | +2.08680 |
| C | +1.44762 | -0.03945 | +3.61528 |
| C | +0.81400 | +1.17897 | +4.22005 |

|   |          |          |          |
|---|----------|----------|----------|
| O | +1.57720 | +2.28227 | +4.39723 |
| C | +2.92924 | +2.28726 | +4.14992 |
| O | -0.34116 | +1.24615 | +4.51517 |
| H | +3.54541 | +1.54727 | +5.06997 |
| H | +3.23129 | +1.85185 | +3.20319 |
| H | +3.31121 | +3.28452 | +4.31857 |
| H | +0.86553 | -0.88491 | +3.96975 |
| H | +2.46808 | -0.16647 | +3.96624 |
| H | +1.94673 | -0.87054 | +1.71710 |
| H | +1.94454 | +0.87269 | +1.71420 |
| H | -0.55034 | +0.86315 | +1.88619 |
| H | -0.53418 | -0.87514 | +1.88594 |
| H | -1.01282 | -0.00583 | -0.39447 |
| H | +0.50128 | +0.88288 | -0.39349 |
| H | +0.51425 | -0.87440 | -0.39568 |
| H | +3.93491 | +1.00359 | +5.73539 |

\* E = +8.842 kcal/mol ; Conformer 033

|   |          |          |          |
|---|----------|----------|----------|
| C | +0.00000 | +0.00000 | +0.00000 |
| C | +0.00000 | +0.00000 | +1.51512 |
| C | +1.40065 | +0.00000 | +2.09367 |
| C | +1.39372 | +0.01312 | +3.61904 |
| C | +2.79988 | +0.09424 | +4.13841 |
| O | +3.37422 | -1.00638 | +4.67569 |
| C | +2.66847 | -2.15098 | +4.95730 |
| O | +3.46350 | +1.08252 | +4.04878 |
| H | +2.21564 | -2.70853 | +3.83040 |
| H | +3.35060 | -2.89100 | +5.35252 |
| H | +1.77931 | -2.00394 | +5.56292 |
| H | +0.88590 | +0.90893 | +3.96874 |
| H | +0.85002 | -0.84858 | +3.99316 |
| H | +1.94011 | -0.87914 | +1.73914 |
| H | +1.95250 | +0.87094 | +1.74290 |
| H | -0.54053 | +0.87335 | +1.88288 |
| H | -0.54211 | -0.87296 | +1.88174 |
| H | -1.01206 | +0.00049 | -0.39705 |
| H | +0.51041 | +0.87794 | -0.39128 |
| H | +0.50920 | -0.87878 | -0.39130 |
| H | +1.89914 | -3.08459 | +3.02858 |

\* E = +9.010 kcal/mol ; Conformer 034

|   |          |          |          |
|---|----------|----------|----------|
| C | +0.00000 | +0.00000 | +0.00000 |
| C | +0.00000 | +0.00000 | +1.51626 |
| C | +1.38762 | +0.00000 | +2.13397 |
| C | +2.17804 | +1.27036 | +1.82696 |
| C | +3.49254 | +1.26267 | +2.54995 |
| O | +4.56951 | +0.73032 | +1.92833 |
| C | +4.50822 | +0.24971 | +0.64228 |

|   |          |          |          |
|---|----------|----------|----------|
| O | +3.63099 | +1.66422 | +3.66564 |
| H | +4.37973 | +1.26968 | -0.20461 |
| H | +5.46504 | -0.18303 | +0.38512 |
| H | +3.65983 | -0.39207 | +0.42681 |
| H | +2.31217 | +1.40269 | +0.75737 |
| H | +1.63286 | +2.13057 | +2.20491 |
| H | +1.30814 | -0.09604 | +3.21527 |
| H | +1.93626 | -0.87769 | +1.78632 |
| H | -0.55536 | +0.86316 | +1.88519 |
| H | -0.53327 | -0.87954 | +1.87488 |
| H | -1.01168 | -0.07314 | -0.39100 |
| H | +0.43698 | +0.90854 | -0.40888 |
| H | +0.56447 | -0.84576 | -0.39100 |
| H | +4.27649 | +2.02101 | -0.76583 |

\* E = +9.091 kcal/mol ; Conformer 035

|   |          |          |          |
|---|----------|----------|----------|
| C | +0.00000 | +0.00000 | +0.00000 |
| C | +0.00000 | +0.00000 | +1.51615 |
| C | +1.38885 | +0.00000 | +2.13168 |
| C | +2.20600 | +1.23737 | +1.76497 |
| C | +3.54957 | +1.19746 | +2.43084 |
| O | +3.67947 | +1.74850 | +3.65960 |
| C | +2.63951 | +2.39089 | +4.28734 |
| O | +4.50459 | +0.66464 | +1.95221 |
| H | +2.39534 | +3.54527 | +3.66929 |
| H | +1.69036 | +1.86476 | +4.26894 |
| H | +2.95897 | +2.68852 | +5.27643 |
| H | +2.40548 | +1.24632 | +0.69865 |
| H | +1.65811 | +2.14419 | +2.01101 |
| H | +1.30015 | -0.07806 | +3.21587 |
| H | +1.93853 | -0.88285 | +1.80646 |
| H | -0.55817 | +0.86285 | +1.88321 |
| H | -0.53174 | -0.88032 | +1.87546 |
| H | -1.01098 | -0.08989 | -0.38927 |
| H | +0.42176 | +0.91613 | -0.40738 |
| H | +0.58086 | -0.83398 | -0.39054 |
| H | +2.25031 | +4.34763 | +3.19469 |

\* E = +9.215 kcal/mol ; Conformer 036

|   |          |          |          |
|---|----------|----------|----------|
| C | +0.00000 | +0.00000 | +0.00000 |
| C | +0.00000 | +0.00000 | +1.51618 |
| C | +1.39125 | +0.00000 | +2.12758 |
| C | +2.24826 | -1.19939 | +1.72075 |
| C | +1.54394 | -2.51788 | +1.86911 |
| O | +1.38131 | -3.04732 | +3.10195 |
| C | +1.73534 | -2.40443 | +4.26180 |
| O | +1.11201 | -3.13547 | +0.94185 |
| H | +0.71865 | -1.64685 | +4.65398 |



|   |          |          |          |
|---|----------|----------|----------|
| H | +1.82465 | -3.13217 | +5.05697 |
| H | +2.57840 | -1.72658 | +4.18665 |
| H | +2.49961 | -1.13683 | +0.66723 |
| H | +3.18494 | -1.19943 | +2.27600 |
| H | +1.92525 | +0.89821 | +1.81727 |
| H | +1.30658 | +0.05461 | +3.21067 |
| H | -0.53129 | +0.87653 | +1.88508 |
| H | -0.55836 | -0.86423 | +1.88042 |
| H | -1.01091 | +0.09696 | -0.38759 |
| H | +0.58480 | +0.83210 | -0.39106 |
| H | +0.41233 | -0.92425 | -0.39746 |
| H | -0.02851 | -1.12249 | +4.90281 |

\* E = +9.227 kcal/mol ; Conformer 037

|   |          |          |          |
|---|----------|----------|----------|
| C | +0.00000 | +0.00000 | +0.00000 |
| C | +0.00000 | +0.00000 | +1.51429 |
| C | +1.40491 | +0.00000 | +2.08565 |
| C | +1.44510 | +0.07602 | +3.61120 |
| C | +0.45913 | -0.82507 | +4.30132 |
| O | +0.66077 | -2.16220 | +4.28693 |
| C | +1.69305 | -2.76847 | +3.61607 |
| O | -0.50645 | -0.41909 | +4.87467 |
| H | +1.31651 | -2.99133 | +2.36275 |
| H | +2.60712 | -2.18966 | +3.53899 |
| H | +1.83503 | -3.76496 | +4.01207 |
| H | +2.45302 | -0.11851 | +3.97673 |
| H | +1.17031 | +1.07382 | +3.93706 |
| H | +1.93415 | -0.88082 | +1.72654 |
| H | +1.95638 | +0.85771 | +1.70101 |
| H | -0.54771 | +0.86352 | +1.89241 |
| H | -0.53786 | -0.87867 | +1.87489 |
| H | -1.01215 | -0.00788 | -0.39598 |
| H | +0.50412 | +0.88075 | -0.39430 |
| H | +0.51407 | -0.87789 | -0.38832 |
| H | +1.01407 | -3.14091 | +1.47751 |

\* E = +9.266 kcal/mol ; Conformer 038

|   |          |          |          |
|---|----------|----------|----------|
| C | +0.00000 | +0.00000 | +0.00000 |
| C | +0.00000 | +0.00000 | +1.51498 |
| C | +1.40109 | +0.00000 | +2.09566 |
| C | +1.38651 | -0.02474 | +3.61988 |
| C | +2.76056 | -0.12941 | +4.21373 |
| O | +3.52541 | +0.98236 | +4.30430 |
| C | +3.17383 | +2.20274 | +3.78415 |
| O | +3.22390 | -1.15439 | +4.61463 |
| H | +3.60127 | +2.28009 | +2.53028 |
| H | +2.11000 | +2.40292 | +3.72396 |
| H | +3.73916 | +2.97762 | +4.28419 |

|   |          |          |          |
|---|----------|----------|----------|
| H | +0.85584 | +0.84387 | +4.00746 |
| H | +0.85808 | -0.90794 | +3.96487 |
| H | +1.94572 | -0.87304 | +1.73640 |
| H | +1.94368 | +0.87124 | +1.73025 |
| H | -0.54305 | +0.87218 | +1.88264 |
| H | -0.54049 | -0.87280 | +1.88299 |
| H | -1.01217 | +0.00143 | -0.39655 |
| H | +0.51131 | +0.87692 | -0.39275 |
| H | +0.50778 | -0.87955 | -0.39101 |
| H | +3.91822 | +2.31565 | +1.63914 |

\* E = +9.339 kcal/mol ; Conformer 039

|   |          |          |          |
|---|----------|----------|----------|
| C | +0.00000 | +0.00000 | +0.00000 |
| C | +0.00000 | +0.00000 | +1.51566 |
| C | +1.39000 | +0.00000 | +2.12971 |
| C | +2.28625 | +1.16802 | +1.70348 |
| C | +1.65332 | +2.48323 | +2.04436 |
| O | +1.95969 | +3.07152 | +3.22484 |
| C | +3.07330 | +2.73115 | +3.95409 |
| O | +0.82994 | +3.00924 | +1.35709 |
| H | +2.97407 | +1.50067 | +4.46977 |
| H | +3.99848 | +2.70478 | +3.38601 |
| H | +3.11833 | +3.36091 | +4.83195 |
| H | +3.26518 | +1.05094 | +2.15770 |
| H | +2.41391 | +1.15985 | +0.62511 |
| H | +1.31124 | -0.01388 | +3.21574 |
| H | +1.90950 | -0.91605 | +1.84793 |
| H | -0.56318 | +0.86071 | +1.87356 |
| H | -0.52188 | -0.88318 | +1.88325 |
| H | -1.00695 | -0.13256 | -0.38762 |
| H | +0.37467 | +0.94257 | -0.39165 |
| H | +0.61526 | -0.80765 | -0.39633 |
| H | +2.92997 | +0.64205 | +4.84913 |

\* E = +9.396 kcal/mol ; Conformer 040

|   |          |          |          |
|---|----------|----------|----------|
| C | +0.00000 | +0.00000 | +0.00000 |
| C | +0.00000 | +0.00000 | +1.51533 |
| C | +1.40643 | +0.00000 | +2.08223 |
| C | +1.46376 | +0.03989 | +3.61174 |
| C | +0.89169 | -1.21528 | +4.19954 |
| O | +1.72706 | -2.25418 | +4.44379 |
| C | +3.08704 | -2.09825 | +4.56160 |
| O | -0.27450 | -1.38137 | +4.39396 |
| H | +3.66061 | -1.77384 | +3.39731 |
| H | +3.39641 | -1.30403 | +5.23477 |
| H | +3.52732 | -3.05907 | +4.79040 |
| H | +2.48674 | +0.20911 | +3.93342 |
| H | +0.85218 | +0.85987 | +3.97781 |

|   |          |          |          |
|---|----------|----------|----------|
| H | +1.95199 | -0.87082 | +1.71783 |
| H | +1.94643 | +0.87138 | +1.71177 |
| H | -0.53389 | +0.87606 | +1.88545 |
| H | -0.54935 | -0.86309 | +1.88662 |
| H | -1.01285 | +0.00617 | -0.39468 |
| H | +0.51512 | +0.87378 | -0.39612 |
| H | +0.50123 | -0.88321 | -0.39241 |
| H | +4.09903 | -1.54827 | +2.59674 |

\* E = +9.879 kcal/mol ; Conformer 041

|   |          |          |          |
|---|----------|----------|----------|
| C | +0.00000 | +0.00000 | +0.00000 |
| C | +0.00000 | +0.00000 | +1.51619 |
| C | +1.38740 | +0.00000 | +2.13610 |
| C | +2.20045 | -1.23875 | +1.77162 |
| C | +3.56166 | -1.23249 | +2.40240 |
| O | +3.69069 | -1.61275 | +3.69425 |
| C | +2.63504 | -1.90544 | +4.52086 |
| O | +4.55141 | -0.90305 | +1.82118 |
| H | +2.23688 | -0.79485 | +5.12789 |
| H | +1.74373 | -2.28551 | +4.03468 |
| H | +2.98499 | -2.51990 | +5.33948 |
| H | +1.64911 | -2.14181 | +2.03140 |
| H | +2.38490 | -1.26513 | +0.70335 |
| H | +1.93627 | +0.88200 | +1.80601 |
| H | +1.29443 | +0.08312 | +3.21741 |
| H | -0.53187 | +0.88026 | +1.87503 |
| H | -0.55948 | -0.86206 | +1.88375 |
| H | -1.01095 | +0.09043 | -0.38935 |
| H | +0.58090 | +0.83409 | -0.39029 |
| H | +0.42156 | -0.91567 | -0.40870 |
| H | +1.97086 | +0.00830 | +5.55295 |

\* E = +10.499 kcal/mol ; Conformer 042

|   |          |          |          |
|---|----------|----------|----------|
| C | +0.00000 | +0.00000 | +0.00000 |
| C | +0.00000 | +0.00000 | +1.51790 |
| C | +1.39543 | +0.00000 | +2.13401 |
| C | +1.97576 | -1.39306 | +2.39723 |
| C | +1.92290 | -2.29918 | +1.20301 |
| O | +2.91699 | -2.23035 | +0.28902 |
| C | +4.03128 | -1.44811 | +0.48052 |
| O | +1.02378 | -3.05787 | +0.99521 |
| H | +4.77588 | -1.97973 | +1.44909 |
| H | +4.65913 | -1.51318 | -0.39713 |
| H | +3.83604 | -0.43394 | +0.81139 |
| H | +2.98961 | -1.31237 | +2.78181 |
| H | +1.37199 | -1.88606 | +3.15290 |
| H | +2.06558 | +0.58234 | +1.50022 |
| H | +1.37810 | +0.50848 | +3.09616 |

|   |          |          |          |
|---|----------|----------|----------|
| H | -0.53349 | +0.88335 | +1.86560 |
| H | -0.55787 | -0.86153 | +1.88506 |
| H | -1.01598 | +0.01015 | -0.38696 |
| H | +0.50806 | +0.88321 | -0.38487 |
| H | +0.48960 | -0.87728 | -0.41423 |
| H | +5.26181 | -2.38677 | +2.14726 |

\* E = +10.693 kcal/mol ; Conformer 043

|   |          |          |          |
|---|----------|----------|----------|
| C | +0.00000 | +0.00000 | +0.00000 |
| C | +0.00000 | +0.00000 | +1.51522 |
| C | +1.38959 | +0.00000 | +2.13053 |
| C | +2.20735 | +1.26088 | +1.79969 |
| C | +3.15222 | +1.06757 | +0.65035 |
| O | +4.27383 | +0.34340 | +0.87923 |
| C | +4.65582 | -0.03490 | +2.14458 |
| O | +2.97309 | +1.48333 | -0.45411 |
| H | +5.04226 | +1.04336 | +2.82239 |
| H | +3.87682 | -0.47408 | +2.75872 |
| H | +5.55238 | -0.63494 | +2.07363 |
| H | +1.54542 | +2.07350 | +1.51584 |
| H | +2.77044 | +1.59097 | +2.66967 |
| H | +1.29814 | -0.08386 | +3.21211 |
| H | +1.92132 | -0.89301 | +1.79786 |
| H | -0.54708 | +0.86893 | +1.88425 |
| H | -0.53667 | -0.87466 | +1.88209 |
| H | -1.01507 | -0.03662 | -0.38776 |
| H | +0.48077 | +0.88662 | -0.40544 |
| H | +0.53476 | -0.86459 | -0.39054 |
| H | +5.29439 | +1.83790 | +3.26690 |

\* E = +10.749 kcal/mol ; Conformer 044

|   |          |          |          |
|---|----------|----------|----------|
| C | +0.00000 | +0.00000 | +0.00000 |
| C | +0.00000 | +0.00000 | +1.51787 |
| C | +1.39103 | +0.00000 | +2.14253 |
| C | +1.98914 | +1.39331 | +2.34159 |
| C | +2.03871 | +2.23663 | +1.10222 |
| O | +2.99376 | +1.99487 | +0.17573 |
| C | +3.91450 | +0.98077 | +0.26879 |
| O | +1.26764 | +3.12248 | +0.88265 |
| H | +3.42978 | -0.11700 | -0.30290 |
| H | +4.76700 | +1.21877 | -0.35312 |
| H | +4.17577 | +0.67144 | +1.27439 |
| H | +1.36511 | +1.95306 | +3.03118 |
| H | +2.97857 | +1.31616 | +2.78919 |
| H | +1.35012 | -0.45680 | +3.12989 |
| H | +2.05629 | -0.62521 | +1.54748 |
| H | -0.56069 | +0.85924 | +1.88766 |
| H | -0.53411 | -0.88380 | +1.86393 |

|   |          |          |          |
|---|----------|----------|----------|
| H | -1.01709 | -0.00247 | -0.38462 |
| H | +0.49584 | +0.87197 | -0.41866 |
| H | +0.50242 | -0.88534 | -0.38525 |
| H | +3.09632 | -0.89610 | -0.71919 |

\* E = +11.361 kcal/mol ; Conformer 045

|   |          |          |          |
|---|----------|----------|----------|
| C | +0.00000 | +0.00000 | +0.00000 |
| C | +0.00000 | +0.00000 | +1.51787 |
| C | +1.39708 | +0.00000 | +2.13155 |
| C | +1.95492 | +1.38960 | +2.46005 |
| C | +1.91962 | +2.31103 | +1.27930 |
| O | +2.96433 | +2.30104 | +0.41634 |
| C | +4.21484 | +1.86358 | +0.78132 |
| O | +0.98300 | +3.00275 | +1.01430 |
| H | +4.26730 | +0.53828 | +0.96514 |
| H | +4.89063 | +2.01470 | -0.04921 |
| H | +4.57943 | +2.26902 | +1.72063 |
| H | +1.32996 | +1.85490 | +3.21658 |
| H | +2.95841 | +1.28777 | +2.86448 |
| H | +1.39461 | -0.55242 | +3.06941 |
| H | +2.08629 | -0.52642 | +1.47232 |
| H | -0.56011 | +0.86032 | +1.88433 |
| H | -0.53235 | -0.88425 | +1.86531 |
| H | -1.01575 | +0.00059 | -0.38812 |
| H | +0.50108 | +0.87218 | -0.41097 |
| H | +0.50082 | -0.88733 | -0.38418 |
| H | +4.36547 | -0.38627 | +1.09644 |

\* E = +11.626 kcal/mol ; Conformer 046

|   |          |          |          |
|---|----------|----------|----------|
| C | +0.00000 | +0.00000 | +0.00000 |
| C | +0.00000 | +0.00000 | +1.51525 |
| C | +1.38249 | +0.00000 | +2.14535 |
| C | +2.21128 | +1.25949 | +1.83823 |
| C | +3.11159 | +1.08147 | +0.65261 |
| O | +4.22381 | +0.32222 | +0.82907 |
| C | +4.83325 | +0.19227 | +2.05370 |
| O | +2.89250 | +1.50182 | -0.44201 |
| H | +4.12452 | -0.51980 | +2.93850 |
| H | +5.72613 | -0.40608 | +1.93394 |
| H | +5.00599 | +1.13164 | +2.57171 |
| H | +1.55849 | +2.09801 | +1.61338 |
| H | +2.80416 | +1.52910 | +2.70899 |
| H | +1.27871 | -0.08399 | +3.22502 |
| H | +1.92994 | -0.88825 | +1.82897 |
| H | -0.55369 | +0.86581 | +1.88246 |
| H | -0.53502 | -0.87678 | +1.87980 |
| H | -1.01446 | -0.06481 | -0.38611 |
| H | +0.45490 | +0.89945 | -0.40587 |

|   |          |          |          |
|---|----------|----------|----------|
| H | +0.55772 | -0.84970 | -0.39112 |
| H | +3.70033 | -1.01358 | +3.61810 |

### S.2.3 (TS<sub>α</sub>)<sup>‡</sup>

\* E = +0.000 kcal/mol ; Conformer 001

|   |          |          |          |
|---|----------|----------|----------|
| C | +0.00000 | +0.00000 | +0.00000 |
| C | +0.00000 | +0.00000 | +1.51512 |
| C | +1.40825 | +0.00000 | +2.09114 |
| C | +1.41455 | +0.01214 | +3.59001 |
| C | +1.00953 | -1.25087 | +4.24186 |
| O | +0.73444 | -1.07965 | +5.53362 |
| C | +0.39234 | -2.25826 | +6.24036 |
| O | +0.96198 | -2.32335 | +3.69607 |
| H | +1.20719 | -2.97438 | +6.19964 |
| H | +0.20735 | -1.94864 | +7.26067 |
| H | -0.49554 | -2.71264 | +5.81182 |
| H | +2.63385 | +0.14822 | +3.95157 |
| H | +0.96387 | +0.88154 | +4.05779 |
| H | +1.93774 | -0.88585 | +1.74399 |
| H | +1.95282 | +0.87026 | +1.72503 |
| H | -0.54129 | +0.87254 | +1.88362 |
| H | -0.52925 | -0.87836 | +1.88259 |
| H | -1.01265 | -0.00066 | -0.39584 |
| H | +0.50965 | +0.87780 | -0.39391 |
| H | +0.50840 | -0.88008 | -0.38891 |
| H | +3.57887 | +0.29526 | +4.16829 |

\* E = +0.308 kcal/mol ; Conformer 002

|   |          |          |          |
|---|----------|----------|----------|
| C | +0.00000 | +0.00000 | +0.00000 |
| C | +0.00000 | +0.00000 | +1.51478 |
| C | +1.40182 | +0.00000 | +2.09386 |
| C | +1.41690 | -0.02513 | +3.59177 |
| C | +2.73608 | +0.15808 | +4.22973 |
| O | +2.71877 | -0.19054 | +5.51567 |
| C | +3.93608 | +0.00779 | +6.21155 |
| O | +3.71273 | +0.59967 | +3.68166 |
| H | +4.73034 | -0.57842 | +5.75994 |
| H | +4.21837 | +1.05582 | +6.19010 |
| H | +3.75290 | -0.31706 | +7.22747 |
| H | +0.76810 | +1.01165 | +3.97153 |
| H | +0.83443 | -0.81319 | +4.05809 |
| H | +1.95159 | -0.86904 | +1.72337 |
| H | +1.95962 | +0.86969 | +1.74967 |
| H | -0.53981 | +0.87328 | +1.88272 |
| H | -0.54425 | -0.87145 | +1.88167 |
| H | -1.01187 | +0.00318 | -0.39747 |
| H | +0.51287 | +0.87678 | -0.39087 |

|   |          |          |          |
|---|----------|----------|----------|
| H | +0.50759 | -0.87946 | -0.39223 |
| H | +0.24382 | +1.80992 | +4.20416 |

\* E = +0.623 kcal/mol ; Conformer 003

|   |          |          |          |
|---|----------|----------|----------|
| C | +0.00000 | +0.00000 | +0.00000 |
| C | +0.00000 | +0.00000 | +1.51610 |
| C | +1.39379 | +0.00000 | +2.13339 |
| C | +2.19198 | +1.22661 | +1.80123 |
| C | +1.73435 | +2.47858 | +2.43916 |
| O | +2.26238 | +3.55590 | +1.86025 |
| C | +1.91505 | +4.79317 | +2.45532 |
| O | +1.00041 | +2.53816 | +3.39212 |
| H | +2.42367 | +5.55328 | +1.87682 |
| H | +0.84025 | +4.94167 | +2.42072 |
| H | +2.23937 | +4.81969 | +3.49098 |
| H | +3.34893 | +1.04787 | +2.31152 |
| H | +2.45261 | +1.36535 | +0.75786 |
| H | +1.30314 | -0.06887 | +3.21532 |
| H | +1.94271 | -0.87839 | +1.79380 |
| H | -0.55125 | +0.86035 | +1.89371 |
| H | -0.52791 | -0.88216 | +1.87679 |
| H | -1.01253 | -0.06565 | -0.39065 |
| H | +0.44371 | +0.90672 | -0.40659 |
| H | +0.56082 | -0.84696 | -0.39320 |
| H | +4.23028 | +0.83538 | +2.69073 |

\* E = +0.795 kcal/mol ; Conformer 004

|   |          |          |          |
|---|----------|----------|----------|
| C | +0.00000 | +0.00000 | +0.00000 |
| C | +0.00000 | +0.00000 | +1.51599 |
| C | +1.39204 | +0.00000 | +2.13627 |
| C | +2.21720 | -1.19113 | +1.74206 |
| C | +3.00445 | -1.06388 | +0.49702 |
| O | +3.37179 | -2.25182 | +0.01849 |
| C | +4.18718 | -2.21106 | -1.13879 |
| O | +3.32424 | -0.02258 | -0.01577 |
| H | +3.66452 | -1.71905 | -1.95315 |
| H | +5.10670 | -1.67110 | -0.93539 |
| H | +4.39786 | -3.24263 | -1.38907 |
| H | +3.12392 | -1.31062 | +2.62641 |
| H | +1.72220 | -2.15412 | +1.82231 |
| H | +1.92870 | +0.90020 | +1.84116 |
| H | +1.29536 | +0.02067 | +3.22107 |
| H | -0.53069 | +0.87968 | +1.87912 |
| H | -0.55615 | -0.86396 | +1.88321 |
| H | -1.01080 | +0.09650 | -0.38908 |
| H | +0.59754 | +0.82003 | -0.39214 |
| H | +0.41314 | -0.92412 | -0.40149 |
| H | +3.77203 | -1.37910 | +3.36872 |

\* E = +0.846 kcal/mol ; Conformer 005

|   |          |          |          |
|---|----------|----------|----------|
| C | +0.00000 | +0.00000 | +0.00000 |
| C | +0.00000 | +0.00000 | +1.51623 |
| C | +1.38768 | +0.00000 | +2.13566 |
| C | +2.21341 | -1.19954 | +1.77789 |
| C | +3.42767 | -1.41012 | +2.59238 |
| O | +4.26442 | -2.27488 | +2.01995 |
| C | +5.42914 | -2.57379 | +2.76791 |
| O | +3.64076 | -0.90116 | +3.66240 |
| H | +6.01116 | -1.67345 | +2.93845 |
| H | +5.16272 | -3.00591 | +3.72750 |
| H | +5.98950 | -3.28298 | +2.17273 |
| H | +1.49732 | -2.22363 | +2.06044 |
| H | +2.39630 | -1.36280 | +0.72181 |
| H | +1.92672 | +0.89684 | +1.81831 |
| H | +1.32107 | +0.05964 | +3.21970 |
| H | -0.53344 | +0.87848 | +1.87636 |
| H | -0.55504 | -0.86451 | +1.88250 |
| H | -1.01087 | +0.08348 | -0.39144 |
| H | +0.57612 | +0.83715 | -0.39195 |
| H | +0.42718 | -0.91473 | -0.40593 |
| H | +0.89982 | -2.97743 | +2.26815 |

21

\* E = +0.880 kcal/mol ; Conformer 006

|   |          |          |          |
|---|----------|----------|----------|
| C | +0.00000 | +0.00000 | +0.00000 |
| C | +0.00000 | +0.00000 | +1.51519 |
| C | +1.40743 | +0.00000 | +2.09285 |
| C | +1.41292 | +0.01902 | +3.59450 |
| C | +0.92313 | -1.17352 | +4.31863 |
| O | +1.09371 | -2.29848 | +3.62339 |
| C | +0.69148 | -3.48326 | +4.28654 |
| O | +0.45757 | -1.15603 | +5.42865 |
| H | +0.89504 | -4.29269 | +3.59755 |
| H | +1.25456 | -3.61199 | +5.20562 |
| H | -0.36628 | -3.44218 | +4.52713 |
| H | +2.64222 | +0.08479 | +3.94101 |
| H | +1.01098 | +0.91690 | +4.05049 |
| H | +1.94363 | -0.87929 | +1.74011 |
| H | +1.94888 | +0.87329 | +1.72904 |
| H | -0.54218 | +0.87094 | +1.88473 |
| H | -0.53395 | -0.87672 | +1.88222 |
| H | -1.01243 | -0.00132 | -0.39625 |
| H | +0.50849 | +0.87884 | -0.39264 |
| H | +0.51050 | -0.87836 | -0.39050 |
| H | +3.59820 | +0.17536 | +4.13994 |

\* E = +0.913 kcal/mol ; Conformer 007



|   |          |          |          |
|---|----------|----------|----------|
| C | +0.00000 | +0.00000 | +0.00000 |
| C | +0.00000 | +0.00000 | +1.51445 |
| C | +1.40869 | +0.00000 | +2.08546 |
| C | +1.46985 | +0.02949 | +3.58527 |
| C | +1.04492 | +1.28399 | +4.24113 |
| O | +1.25076 | +1.24438 | +5.55669 |
| C | +0.84524 | +2.39972 | +6.26794 |
| O | +0.55802 | +2.23314 | +3.68220 |
| H | +1.38600 | +3.27194 | +5.91399 |
| H | -0.21898 | +2.57048 | +6.13846 |
| H | +1.07591 | +2.20395 | +7.30698 |
| H | +0.62450 | -0.84607 | +4.01527 |
| H | +2.37982 | -0.35956 | +4.02959 |
| H | +1.94442 | -0.87991 | +1.73067 |
| H | +1.94712 | +0.87004 | +1.70202 |
| H | -0.53312 | +0.87207 | +1.88610 |
| H | -0.53077 | -0.87866 | +1.88325 |
| H | -1.01253 | -0.01430 | -0.39568 |
| H | +0.49399 | +0.88796 | -0.39045 |
| H | +0.52230 | -0.86976 | -0.39613 |
| H | +0.00786 | -1.53926 | +4.30214 |

\* E = +1.071 kcal/mol ; Conformer 008

|   |          |          |          |
|---|----------|----------|----------|
| C | +0.00000 | +0.00000 | +0.00000 |
| C | +0.00000 | +0.00000 | +1.51471 |
| C | +1.40165 | +0.00000 | +2.09513 |
| C | +1.40428 | -0.01349 | +3.59657 |
| C | +2.69544 | +0.05377 | +4.31162 |
| O | +3.63460 | +0.68855 | +3.61059 |
| C | +4.88308 | +0.82857 | +4.26435 |
| O | +2.88570 | -0.37623 | +5.41990 |
| H | +4.76695 | +1.39274 | +5.18445 |
| H | +5.29778 | -0.14618 | +4.50129 |
| H | +5.52340 | +1.35734 | +3.57031 |
| H | +0.82629 | +1.07262 | +3.94506 |
| H | +0.76377 | -0.75798 | +4.05643 |
| H | +1.94611 | -0.87545 | +1.73148 |
| H | +1.95766 | +0.86651 | +1.74054 |
| H | -0.53944 | +0.87332 | +1.88321 |
| H | -0.54301 | -0.87161 | +1.88235 |
| H | -1.01192 | +0.00100 | -0.39725 |
| H | +0.51046 | +0.87803 | -0.39144 |
| H | +0.50891 | -0.87867 | -0.39239 |
| H | +0.35565 | +1.91470 | +4.14193 |

\* E = +1.176 kcal/mol ; Conformer 009

|   |          |          |          |
|---|----------|----------|----------|
| C | +0.00000 | +0.00000 | +0.00000 |
| C | +0.00000 | +0.00000 | +1.51618 |

|   |          |          |          |
|---|----------|----------|----------|
| C | +1.38553 | +0.00000 | +2.13745 |
| C | +2.20784 | +1.20620 | +1.78863 |
| C | +3.47233 | +1.35123 | +2.53878 |
| O | +4.01318 | +2.55748 | +2.37342 |
| C | +5.25685 | +2.75589 | +3.02105 |
| O | +3.98560 | +0.48479 | +3.19810 |
| H | +5.55428 | +3.76976 | +2.78697 |
| H | +5.15035 | +2.62660 | +4.09361 |
| H | +5.99252 | +2.04712 | +2.65374 |
| H | +2.63181 | +1.06264 | +0.58682 |
| H | +1.66550 | +2.14340 | +1.70498 |
| H | +1.30058 | -0.04906 | +3.22404 |
| H | +1.93198 | -0.89857 | +1.85086 |
| H | -0.55631 | +0.86497 | +1.88108 |
| H | -0.53545 | -0.87712 | +1.87713 |
| H | -1.01075 | -0.09203 | -0.39020 |
| H | +0.42313 | +0.91684 | -0.40503 |
| H | +0.58472 | -0.83072 | -0.39220 |
| H | +2.95769 | +0.91861 | -0.32461 |

\* E = +1.408 kcal/mol ; Conformer 010

|   |          |          |          |
|---|----------|----------|----------|
| C | +0.00000 | +0.00000 | +0.00000 |
| C | +0.00000 | +0.00000 | +1.51609 |
| C | +1.39426 | +0.00000 | +2.13199 |
| C | +2.20323 | +1.21513 | +1.77183 |
| C | +1.74806 | +2.53341 | +2.26270 |
| O | +1.09820 | +2.44787 | +3.42381 |
| C | +0.68125 | +3.68436 | +3.97375 |
| O | +1.96483 | +3.58154 | +1.71133 |
| H | +0.17852 | +3.44220 | +4.90108 |
| H | +1.53837 | +4.32427 | +4.15873 |
| H | +0.00535 | +4.19289 | +3.29332 |
| H | +3.33032 | +1.06020 | +2.35421 |
| H | +2.50717 | +1.29308 | +0.73484 |
| H | +1.30900 | -0.06020 | +3.21470 |
| H | +1.93623 | -0.88610 | +1.80118 |
| H | -0.55187 | +0.86331 | +1.88872 |
| H | -0.53076 | -0.87947 | +1.87942 |
| H | -1.01222 | -0.06906 | -0.39060 |
| H | +0.44152 | +0.90829 | -0.40456 |
| H | +0.56336 | -0.84578 | -0.39181 |
| H | +4.18404 | +0.86187 | +2.79552 |

\* E = +1.552 kcal/mol ; Conformer 011

|   |          |          |          |
|---|----------|----------|----------|
| C | +0.00000 | +0.00000 | +0.00000 |
| C | +0.00000 | +0.00000 | +1.51615 |
| C | +1.39055 | +0.00000 | +2.14012 |
| C | +2.19678 | -1.22563 | +1.80691 |

|   |          |          |          |
|---|----------|----------|----------|
| C | +2.88557 | -1.31390 | +0.50150 |
| O | +3.29783 | -0.12628 | +0.05945 |
| C | +4.00557 | -0.15217 | -1.16651 |
| O | +3.10149 | -2.34127 | -0.08866 |
| H | +4.27445 | +0.87513 | -1.37569 |
| H | +4.89355 | -0.77022 | -1.07850 |
| H | +3.37774 | -0.55163 | -1.95707 |
| H | +3.16699 | -1.22976 | +2.63206 |
| H | +1.71204 | -2.16983 | +2.03118 |
| H | +1.93882 | +0.88509 | +1.82292 |
| H | +1.28908 | +0.05895 | +3.22325 |
| H | -0.53094 | +0.88026 | +1.87777 |
| H | -0.55692 | -0.86324 | +1.88278 |
| H | -1.01156 | +0.09053 | -0.38835 |
| H | +0.58571 | +0.83027 | -0.39012 |
| H | +0.41828 | -0.91979 | -0.40484 |
| H | +3.86474 | -1.19651 | +3.32861 |

\* E = +1.690 kcal/mol ; Conformer 012

|   |          |          |          |
|---|----------|----------|----------|
| C | +0.00000 | +0.00000 | +0.00000 |
| C | +0.00000 | +0.00000 | +1.51637 |
| C | +1.38734 | +0.00000 | +2.13816 |
| C | +2.18314 | -1.23705 | +1.83107 |
| C | +3.49388 | -1.42168 | +2.48830 |
| O | +3.56277 | -0.81738 | +3.67423 |
| C | +4.77937 | -1.00245 | +4.37517 |
| O | +4.39736 | -2.07637 | +2.03586 |
| H | +4.67286 | -0.45582 | +5.30316 |
| H | +4.94746 | -2.05723 | +4.56894 |
| H | +5.61231 | -0.61573 | +3.79645 |
| H | +1.49020 | -2.20716 | +2.29545 |
| H | +2.26153 | -1.50476 | +0.78435 |
| H | +1.94305 | +0.87150 | +1.78108 |
| H | +1.31332 | +0.11112 | +3.21753 |
| H | -0.53249 | +0.88022 | +1.87393 |
| H | -0.55682 | -0.86255 | +1.88480 |
| H | -1.01202 | +0.07649 | -0.38979 |
| H | +0.56903 | +0.84214 | -0.39111 |
| H | +0.43324 | -0.90995 | -0.40923 |
| H | +0.90140 | -2.91057 | +2.65448 |

\* E = +1.886 kcal/mol ; Conformer 013

|   |          |          |          |
|---|----------|----------|----------|
| C | +0.00000 | +0.00000 | +0.00000 |
| C | +0.00000 | +0.00000 | +1.51602 |
| C | +1.38622 | +0.00000 | +2.13747 |
| C | +2.20601 | +1.21022 | +1.78178 |
| C | +3.47126 | +1.43682 | +2.51143 |
| O | +4.00636 | +0.30176 | +2.96033 |

|   |          |          |          |
|---|----------|----------|----------|
| C | +5.24773 | +0.44263 | +3.62747 |
| O | +3.99466 | +2.51062 | +2.65903 |
| H | +5.54065 | -0.55653 | +3.92268 |
| H | +5.98709 | +0.87785 | +2.96245 |
| H | +5.13946 | +1.08257 | +4.49755 |
| H | +2.62765 | +1.04209 | +0.58490 |
| H | +1.65537 | +2.14094 | +1.69382 |
| H | +1.29305 | -0.04654 | +3.22393 |
| H | +1.93039 | -0.89985 | +1.85102 |
| H | -0.55498 | +0.86552 | +1.88106 |
| H | -0.53557 | -0.87696 | +1.87745 |
| H | -1.01108 | -0.09221 | -0.38912 |
| H | +0.42216 | +0.91714 | -0.40500 |
| H | +0.58463 | -0.83048 | -0.39289 |
| H | +2.95261 | +0.87119 | -0.32555 |

\* E = +2.101 kcal/mol ; Conformer 014

|   |          |          |          |
|---|----------|----------|----------|
| C | +0.00000 | +0.00000 | +0.00000 |
| C | +0.00000 | +0.00000 | +1.51464 |
| C | +1.39286 | +0.00000 | +2.13521 |
| C | +2.24255 | +1.19300 | +1.78197 |
| C | +3.15740 | +1.04022 | +0.62957 |
| O | +3.92585 | +2.11651 | +0.46886 |
| C | +4.81858 | +2.06459 | -0.62903 |
| O | +3.21179 | +0.08147 | -0.09646 |
| H | +5.50370 | +1.22942 | -0.52120 |
| H | +4.26996 | +1.95039 | -1.55878 |
| H | +5.35710 | +3.00323 | -0.61744 |
| H | +1.46114 | +2.14777 | +1.41512 |
| H | +2.74011 | +1.68617 | +2.60993 |
| H | +1.29666 | -0.05541 | +3.21723 |
| H | +1.92155 | -0.89658 | +1.80899 |
| H | -0.55225 | +0.86602 | +1.88294 |
| H | -0.53132 | -0.87865 | +1.87850 |
| H | -1.01548 | -0.04815 | -0.38647 |
| H | +0.45921 | +0.90156 | -0.40140 |
| H | +0.55969 | -0.84537 | -0.39244 |
| H | +0.85025 | +2.86781 | +1.16895 |

\* E = +2.209 kcal/mol ; Conformer 015

|   |          |          |          |
|---|----------|----------|----------|
| C | +0.00000 | +0.00000 | +0.00000 |
| C | +0.00000 | +0.00000 | +1.51480 |
| C | +1.39016 | +0.00000 | +2.13725 |
| C | +2.35705 | -1.05702 | +1.67835 |
| C | +1.93593 | -2.47275 | +1.67797 |
| O | +2.97900 | -3.28379 | +1.49488 |
| C | +2.66837 | -4.66353 | +1.43004 |
| O | +0.80847 | -2.87972 | +1.79470 |

|   |          |          |          |
|---|----------|----------|----------|
| H | +2.20424 | -4.99170 | +2.35490 |
| H | +1.98813 | -4.86110 | +0.60733 |
| H | +3.61096 | -5.17223 | +1.27535 |
| H | +2.64703 | -0.83059 | +0.44768 |
| H | +3.35141 | -0.95050 | +2.09964 |
| H | +1.86574 | +0.96451 | +1.95370 |
| H | +1.29144 | -0.08164 | +3.22192 |
| H | -0.51594 | +0.88839 | +1.87846 |
| H | -0.55753 | -0.85964 | +1.87353 |
| H | -1.00940 | +0.12300 | -0.38507 |
| H | +0.61085 | +0.80659 | -0.40432 |
| H | +0.38366 | -0.93873 | -0.39453 |
| H | +2.93407 | -0.60232 | -0.45706 |

\* E = +2.256 kcal/mol ; Conformer 016

|   |          |          |          |
|---|----------|----------|----------|
| C | +0.00000 | +0.00000 | +0.00000 |
| C | +0.00000 | +0.00000 | +1.51445 |
| C | +1.40935 | +0.00000 | +2.08538 |
| C | +1.48776 | +0.04923 | +3.58798 |
| C | +1.24763 | +1.32412 | +4.29931 |
| O | +0.67445 | +2.25268 | +3.53350 |
| C | +0.40175 | +3.48260 | +4.18118 |
| O | +1.51690 | +1.51063 | +5.45767 |
| H | -0.27059 | +3.32750 | +5.01907 |
| H | +1.32071 | +3.92909 | +4.54780 |
| H | -0.05828 | +4.11578 | +3.43360 |
| H | +0.55160 | -0.70992 | +4.03375 |
| H | +2.34933 | -0.44024 | +4.02690 |
| H | +1.93039 | -0.89320 | +1.74230 |
| H | +1.95783 | +0.85276 | +1.67861 |
| H | -0.53874 | +0.86892 | +1.88581 |
| H | -0.52978 | -0.87872 | +1.88344 |
| H | -1.01221 | -0.01820 | -0.39638 |
| H | +0.49235 | +0.88851 | -0.39162 |
| H | +0.52518 | -0.86832 | -0.39502 |
| H | -0.14573 | -1.31970 | +4.34521 |

\* E = +3.506 kcal/mol ; Conformer 017

|   |          |          |          |
|---|----------|----------|----------|
| C | +0.00000 | +0.00000 | +0.00000 |
| C | +0.00000 | +0.00000 | +1.51448 |
| C | +1.38816 | +0.00000 | +2.13817 |
| C | +2.36634 | -1.08035 | +1.74580 |
| C | +2.04450 | -2.51948 | +1.85629 |
| O | +0.80631 | -2.82001 | +1.46695 |
| C | +0.48008 | -4.19816 | +1.50754 |
| O | +2.83233 | -3.35687 | +2.21518 |
| H | -0.54378 | -4.27022 | +1.16412 |
| H | +1.14227 | -4.76254 | +0.85853 |

|   |          |          |          |
|---|----------|----------|----------|
| H | +0.57238 | -4.57999 | +2.51940 |
| H | +2.63529 | -0.92445 | +0.49486 |
| H | +3.35099 | -0.92152 | +2.17017 |
| H | +1.87361 | +0.95011 | +1.91029 |
| H | +1.28768 | -0.02318 | +3.22584 |
| H | -0.51069 | +0.89191 | +1.87741 |
| H | -0.56960 | -0.85123 | +1.87707 |
| H | -1.00874 | +0.12663 | -0.38623 |
| H | +0.61153 | +0.80843 | -0.39904 |
| H | +0.38707 | -0.93679 | -0.39321 |
| H | +2.90565 | -0.74175 | -0.42108 |

\* E = +3.587 kcal/mol ; Conformer 018

|   |          |          |          |
|---|----------|----------|----------|
| C | +0.00000 | +0.00000 | +0.00000 |
| C | +0.00000 | +0.00000 | +1.51428 |
| C | +1.39217 | +0.00000 | +2.13665 |
| C | +2.22250 | +1.23035 | +1.85025 |
| C | +3.27718 | +1.19930 | +0.81197 |
| O | +3.16928 | +0.16345 | -0.01870 |
| C | +4.13490 | +0.11865 | -1.05353 |
| O | +4.13416 | +2.03769 | +0.70008 |
| H | +4.06713 | +1.00767 | -1.67265 |
| H | +5.13493 | +0.05882 | -0.63561 |
| H | +3.90897 | -0.76794 | -1.63178 |
| H | +1.43797 | +2.13864 | +1.41174 |
| H | +2.61227 | +1.74344 | +2.72142 |
| H | +1.28941 | -0.10000 | +3.21517 |
| H | +1.93315 | -0.87879 | +1.78611 |
| H | -0.55191 | +0.86610 | +1.88242 |
| H | -0.53311 | -0.87809 | +1.87690 |
| H | -1.01598 | -0.01867 | -0.38749 |
| H | +0.48899 | +0.88528 | -0.40168 |
| H | +0.53014 | -0.86597 | -0.39013 |
| H | +0.81662 | +2.84436 | +1.11352 |

\* E = +3.824 kcal/mol ; Conformer 019

|   |          |          |          |
|---|----------|----------|----------|
| C | +0.00000 | +0.00000 | +0.00000 |
| C | +0.00000 | +0.00000 | +1.51640 |
| C | +1.40034 | +0.00000 | +2.12387 |
| C | +2.07127 | -1.34605 | +2.22480 |
| C | +1.69758 | -2.25416 | +3.33226 |
| O | +0.53920 | -1.92732 | +3.90563 |
| C | +0.12059 | -2.78714 | +4.95053 |
| O | +2.34615 | -3.20981 | +3.67100 |
| H | -0.82394 | -2.39084 | +5.30008 |
| H | -0.00170 | -3.80013 | +4.58026 |
| H | +0.85291 | -2.79341 | +5.75174 |
| H | +1.76641 | -2.06273 | +1.19421 |

|   |          |          |          |
|---|----------|----------|----------|
| H | +3.15005 | -1.34095 | +2.12208 |
| H | +2.03897 | +0.66609 | +1.54504 |
| H | +1.35186 | +0.41624 | +3.13094 |
| H | -0.52739 | +0.88593 | +1.86733 |
| H | -0.55688 | -0.85379 | +1.89817 |
| H | -1.01495 | -0.01070 | -0.39080 |
| H | +0.49412 | +0.88951 | -0.38755 |
| H | +0.51441 | -0.86642 | -0.40868 |
| H | +1.58570 | -2.64696 | +0.43961 |

\* E = +8.039 kcal/mol ; Conformer 020

|   |          |          |          |
|---|----------|----------|----------|
| C | +0.00000 | +0.00000 | +0.00000 |
| C | +0.00000 | +0.00000 | +1.51505 |
| C | +1.40922 | +0.00000 | +2.08886 |
| C | +1.41528 | +0.00905 | +3.58848 |
| C | +1.03918 | -1.28073 | +4.22592 |
| O | +0.87557 | -1.31069 | +5.55341 |
| C | +1.01258 | -0.14553 | +6.33505 |
| O | +0.91090 | -2.29614 | +3.60058 |
| H | +1.97355 | +0.33692 | +6.17590 |
| H | +0.20715 | +0.55936 | +6.13902 |
| H | +0.94820 | -0.47410 | +7.36481 |
| H | +2.63323 | +0.19102 | +3.94860 |
| H | +0.93948 | +0.87999 | +4.03014 |
| H | +1.93954 | -0.88374 | +1.73971 |
| H | +1.95046 | +0.87433 | +1.72694 |
| H | -0.53992 | +0.87429 | +1.88253 |
| H | -0.52717 | -0.87812 | +1.88391 |
| H | -1.01303 | +0.00138 | -0.39466 |
| H | +0.51163 | +0.87611 | -0.39527 |
| H | +0.50521 | -0.88212 | -0.38815 |
| H | +3.57234 | +0.37848 | +4.16337 |

\* E = +8.374 kcal/mol ; Conformer 021

|   |          |          |          |
|---|----------|----------|----------|
| C | +0.00000 | +0.00000 | +0.00000 |
| C | +0.00000 | +0.00000 | +1.51487 |
| C | +1.40210 | +0.00000 | +2.09249 |
| C | +1.41756 | -0.01864 | +3.59069 |
| C | +2.76345 | +0.10063 | +4.20865 |
| O | +2.86630 | -0.02463 | +5.53736 |
| C | +1.73955 | -0.30911 | +6.33485 |
| O | +3.74899 | +0.33325 | +3.56684 |
| H | +0.94059 | +0.41090 | +6.17721 |
| H | +1.37077 | -1.31678 | +6.15372 |
| H | +2.08064 | -0.23967 | +7.36023 |
| H | +0.80220 | +1.04858 | +3.96268 |
| H | +0.78567 | -0.78199 | +4.03612 |
| H | +1.95442 | -0.87011 | +1.73031 |

|   |          |          |          |
|---|----------|----------|----------|
| H | +1.96350 | +0.86504 | +1.74356 |
| H | -0.54097 | +0.87322 | +1.88190 |
| H | -0.54439 | -0.87210 | +1.88081 |
| H | -1.01185 | +0.00174 | -0.39739 |
| H | +0.51166 | +0.87747 | -0.39057 |
| H | +0.50920 | -0.87853 | -0.39186 |
| H | +0.30195 | +1.86282 | +4.18205 |

\* E = +8.703 kcal/mol ; Conformer 022

|   |          |          |          |
|---|----------|----------|----------|
| C | +0.00000 | +0.00000 | +0.00000 |
| C | +0.00000 | +0.00000 | +1.51607 |
| C | +1.39333 | +0.00000 | +2.13480 |
| C | +2.19358 | +1.22591 | +1.80198 |
| C | +1.74428 | +2.47164 | +2.47776 |
| O | +2.31089 | +3.63001 | +2.12013 |
| C | +3.28887 | +3.68519 | +1.10654 |
| O | +0.92118 | +2.47190 | +3.35021 |
| H | +4.11720 | +3.01061 | +1.30759 |
| H | +2.86075 | +3.46520 | +0.13059 |
| H | +3.65469 | +4.70437 | +1.10711 |
| H | +3.36680 | +1.02288 | +2.27457 |
| H | +2.42247 | +1.34735 | +0.74812 |
| H | +1.30227 | -0.06883 | +3.21608 |
| H | +1.94261 | -0.87730 | +1.79218 |
| H | -0.55163 | +0.85809 | +1.89569 |
| H | -0.52399 | -0.88504 | +1.87505 |
| H | -1.01212 | -0.07535 | -0.38963 |
| H | +0.43132 | +0.91235 | -0.40825 |
| H | +0.56904 | -0.84065 | -0.39529 |
| H | +4.25894 | +0.79037 | +2.61697 |

\* E = +8.859 kcal/mol ; Conformer 023

|   |          |          |          |
|---|----------|----------|----------|
| C | +0.00000 | +0.00000 | +0.00000 |
| C | +0.00000 | +0.00000 | +1.51439 |
| C | +1.40927 | +0.00000 | +2.08361 |
| C | +1.47208 | +0.04439 | +3.58410 |
| C | +1.06242 | +1.33137 | +4.20612 |
| O | +1.13910 | +1.44405 | +5.53733 |
| C | +1.66694 | +0.40769 | +6.33416 |
| O | +0.65547 | +2.26143 | +3.56749 |
| H | +1.14796 | -0.53308 | +6.17188 |
| H | +2.73290 | +0.27815 | +6.15759 |
| H | +1.51756 | +0.72165 | +7.35965 |
| H | +0.61139 | -0.82896 | +4.00547 |
| H | +2.38356 | -0.36342 | +4.01069 |
| H | +1.94185 | -0.88508 | +1.73693 |
| H | +1.94807 | +0.86732 | +1.69643 |
| H | -0.53127 | +0.87309 | +1.88556 |



|   |          |          |          |
|---|----------|----------|----------|
| H | -0.53093 | -0.87885 | +1.88289 |
| H | -1.01279 | -0.01597 | -0.39470 |
| H | +0.49167 | +0.88937 | -0.38974 |
| H | +0.52358 | -0.86867 | -0.39689 |
| H | -0.01231 | -1.52466 | +4.26705 |

\* E = +8.956 kcal/mol ; Conformer 024

|   |          |          |          |
|---|----------|----------|----------|
| C | +0.00000 | +0.00000 | +0.00000 |
| C | +0.00000 | +0.00000 | +1.51657 |
| C | +1.38582 | +0.00000 | +2.13928 |
| C | +2.19603 | -1.22030 | +1.81798 |
| C | +3.46537 | -1.34594 | +2.58044 |
| O | +4.29624 | -2.34840 | +2.26918 |
| C | +4.00605 | -3.24041 | +1.21735 |
| O | +3.75680 | -0.60584 | +3.47752 |
| H | +3.03144 | -3.70607 | +1.33935 |
| H | +4.06068 | -2.74365 | +0.25065 |
| H | +4.77118 | -4.00539 | +1.26189 |
| H | +1.49016 | -2.22389 | +2.20873 |
| H | +2.29405 | -1.44030 | +0.75982 |
| H | +1.94208 | +0.87790 | +1.80158 |
| H | +1.32018 | +0.09430 | +3.22056 |
| H | -0.53105 | +0.88110 | +1.87348 |
| H | -0.56032 | -0.86071 | +1.88422 |
| H | -1.01072 | +0.08595 | -0.39114 |
| H | +0.57749 | +0.83632 | -0.39131 |
| H | +0.42369 | -0.91513 | -0.40932 |
| H | +0.89865 | -2.95037 | +2.49981 |

\* E = +9.099 kcal/mol ; Conformer 025

|   |          |          |          |
|---|----------|----------|----------|
| C | +0.00000 | +0.00000 | +0.00000 |
| C | +0.00000 | +0.00000 | +1.51568 |
| C | +1.38969 | +0.00000 | +2.14180 |
| C | +2.20801 | -1.20287 | +1.76581 |
| C | +3.04799 | -1.06396 | +0.54564 |
| O | +3.65477 | -2.15692 | +0.06683 |
| C | +3.48209 | -3.41895 | +0.67037 |
| O | +3.23625 | -0.01190 | +0.00221 |
| H | +3.72991 | -3.39790 | +1.72860 |
| H | +2.46751 | -3.78809 | +0.53482 |
| H | +4.16797 | -4.08365 | +0.16013 |
| H | +3.06874 | -1.36279 | +2.69210 |
| H | +1.66600 | -2.14243 | +1.83085 |
| H | +1.93303 | +0.89314 | +1.84110 |
| H | +1.28544 | +0.02829 | +3.22591 |
| H | -0.53048 | +0.88004 | +1.87804 |
| H | -0.55808 | -0.86267 | +1.88444 |
| H | -1.01312 | +0.07901 | -0.38703 |

|   |          |          |          |
|---|----------|----------|----------|
| H | +0.58458 | +0.82841 | -0.39229 |
| H | +0.43152 | -0.91397 | -0.40481 |
| H | +3.67734 | -1.46844 | +3.46636 |

\* E = +9.208 kcal/mol ; Conformer 026

|   |          |          |          |
|---|----------|----------|----------|
| C | +0.00000 | +0.00000 | +0.00000 |
| C | +0.00000 | +0.00000 | +1.51623 |
| C | +1.38416 | +0.00000 | +2.13990 |
| C | +2.20711 | +1.20748 | +1.79562 |
| C | +3.46706 | +1.33915 | +2.57379 |
| O | +4.20004 | +2.44781 | +2.41454 |
| C | +3.76437 | +3.50204 | +1.58680 |
| O | +3.86425 | +0.47815 | +3.30720 |
| H | +3.55588 | +3.16243 | +0.57548 |
| H | +2.88611 | +3.99323 | +2.00105 |
| H | +4.58244 | +4.21098 | +1.55972 |
| H | +2.63340 | +1.05767 | +0.58978 |
| H | +1.63895 | +2.12952 | +1.70272 |
| H | +1.30271 | -0.04885 | +3.22611 |
| H | +1.93347 | -0.89685 | +1.85428 |
| H | -0.55882 | +0.86339 | +1.88167 |
| H | -0.53455 | -0.87784 | +1.87636 |
| H | -1.01025 | -0.09484 | -0.39065 |
| H | +0.42028 | +0.91806 | -0.40595 |
| H | +0.58719 | -0.82892 | -0.39218 |
| H | +2.95328 | +0.90371 | -0.32125 |

\* E = +10.127 kcal/mol ; Conformer 027

|   |          |          |          |
|---|----------|----------|----------|
| C | +0.00000 | +0.00000 | +0.00000 |
| C | +0.00000 | +0.00000 | +1.51448 |
| C | +1.39075 | +0.00000 | +2.14014 |
| C | +2.24700 | +1.18801 | +1.78083 |
| C | +3.15310 | +1.00789 | +0.61411 |
| O | +3.97134 | +2.01623 | +0.28905 |
| C | +4.05376 | +3.18330 | +1.07518 |
| O | +3.16827 | +0.01214 | -0.05354 |
| H | +3.08457 | +3.65872 | +1.19946 |
| H | +4.49111 | +2.97293 | +2.04922 |
| H | +4.70967 | +3.85438 | +0.53477 |
| H | +1.44684 | +2.13905 | +1.42579 |
| H | +2.73643 | +1.66678 | +2.62303 |
| H | +1.28903 | -0.04367 | +3.22226 |
| H | +1.92018 | -0.89838 | +1.82275 |
| H | -0.55408 | +0.86502 | +1.88305 |
| H | -0.53048 | -0.87898 | +1.87848 |
| H | -1.01647 | -0.04244 | -0.38448 |
| H | +0.46377 | +0.89851 | -0.40315 |
| H | +0.55507 | -0.84754 | -0.39323 |

H +0.80899 +2.84174 +1.19916

### S.2.4 (TS<sub>β</sub>)<sup>‡</sup>

\* E = +0.000 kcal/mol ; Conformer 001

|   |          |          |          |
|---|----------|----------|----------|
| C | +0.00000 | +0.00000 | +0.00000 |
| C | +0.00000 | +0.00000 | +1.51521 |
| C | +1.38055 | +0.00000 | +2.09723 |
| C | +1.49182 | +0.06738 | +3.58898 |
| C | +1.11459 | -1.22218 | +4.25998 |
| O | +1.10300 | -1.09682 | +5.58413 |
| C | +0.77706 | -2.27421 | +6.30265 |
| O | +0.86143 | -2.25339 | +3.69840 |
| H | +1.49460 | -3.05971 | +6.08746 |
| H | +0.81254 | -2.00145 | +7.34925 |
| H | -0.21508 | -2.62065 | +6.03105 |
| H | +2.50958 | +0.30280 | +3.90105 |
| H | +0.86330 | +0.85649 | +4.00056 |
| H | +2.04331 | -0.73619 | +1.65070 |
| H | +1.93407 | +1.15284 | +1.68156 |
| H | -0.54752 | +0.86705 | +1.88957 |
| H | -0.52764 | -0.88270 | +1.88496 |
| H | -1.01268 | +0.00156 | -0.39477 |
| H | +0.51308 | +0.87655 | -0.39061 |
| H | +0.50580 | -0.88206 | -0.38754 |
| H | +2.28871 | +1.97339 | +1.43506 |

\* E = +0.199 kcal/mol ; Conformer 002

|   |          |          |          |
|---|----------|----------|----------|
| C | +0.00000 | +0.00000 | +0.00000 |
| C | +0.00000 | +0.00000 | +1.51550 |
| C | +1.38170 | +0.00000 | +2.09568 |
| C | +1.47616 | +0.07366 | +3.58687 |
| C | +2.88504 | -0.02474 | +4.08755 |
| O | +2.97909 | +0.35561 | +5.35885 |
| C | +4.27428 | +0.26014 | +5.92577 |
| O | +3.82360 | -0.41577 | +3.44940 |
| H | +4.97349 | +0.88262 | +5.37656 |
| H | +4.17664 | +0.60512 | +6.94681 |
| H | +4.62391 | -0.76724 | +5.90076 |
| H | +1.02936 | +0.98746 | +3.97598 |
| H | +0.91930 | -0.74591 | +4.05122 |
| H | +2.06025 | -0.72791 | +1.66102 |
| H | +1.92358 | +1.14416 | +1.67691 |
| H | -0.54935 | +0.86655 | +1.88766 |
| H | -0.54169 | -0.87689 | +1.88340 |
| H | -1.01231 | -0.00118 | -0.39577 |
| H | +0.51039 | +0.87907 | -0.38732 |
| H | +0.51169 | -0.87784 | -0.38941 |

H +2.23716 +1.99175 +1.43829

\* E = +0.644 kcal/mol ; Conformer 003

C +0.00000 +0.00000 +0.00000  
C +0.00000 +0.00000 +1.51685  
C +1.36789 +0.00000 +2.13673  
C +2.35983 +1.02396 +1.67458  
C +1.99284 +2.42054 +2.08658  
O +2.79730 +3.32100 +1.52792  
C +2.54180 +4.66838 +1.88564  
O +1.10031 +2.71626 +2.83427  
H +3.27482 +5.26001 +1.35301  
H +1.53567 +4.95291 +1.59429  
H +2.64807 +4.80203 +2.95758  
H +3.34749 +0.82056 +2.08900  
H +2.48656 +1.01294 +0.59365  
H +1.34656 -0.10636 +3.21688  
H +1.91884 -1.16887 +1.76643  
H -0.54353 +0.87089 +1.89007  
H -0.54029 -0.87332 +1.88110  
H -1.01205 -0.09289 -0.38527  
H +0.41457 +0.92004 -0.40696  
H +0.58340 -0.83136 -0.39251  
H +2.29897 -1.96878 +1.48832

\* E = +0.732 kcal/mol ; Conformer 004

C +0.00000 +0.00000 +0.00000  
C +0.00000 +0.00000 +1.51726  
C +1.36968 +0.00000 +2.13176  
C +2.32396 +1.05801 +1.67197  
C +3.58106 +1.09900 +2.48697  
O +4.52594 +1.81886 +1.88787  
C +5.74124 +1.94200 +2.60605  
O +3.73579 +0.57675 +3.55675  
H +6.39085 +2.54692 +1.98705  
H +5.56830 +2.42308 +3.56368  
H +6.17868 +0.96375 +2.77833  
H +2.59740 +0.94131 +0.62485  
H +1.86795 +2.05054 +1.74641  
H +1.38027 -0.12992 +3.20880  
H +1.92498 -1.14710 +1.73254  
H -0.55164 +0.87198 +1.88255  
H -0.54383 -0.87004 +1.88313  
H -1.01198 -0.07510 -0.38939  
H +0.43673 +0.91116 -0.40362  
H +0.57017 -0.84234 -0.38745  
H +2.30780 -1.92944 +1.39387

\* E = +0.741 kcal/mol ; Conformer 005

|   |          |          |          |
|---|----------|----------|----------|
| C | +0.00000 | +0.00000 | +0.00000 |
| C | +0.00000 | +0.00000 | +1.52128 |
| C | +1.37987 | +0.00000 | +2.11186 |
| C | +2.16692 | -1.26722 | +1.98730 |
| C | +3.55306 | -1.14673 | +2.54345 |
| O | +4.10433 | -2.34065 | +2.74472 |
| C | +5.43337 | -2.31947 | +3.23585 |
| O | +4.12525 | -0.11503 | +2.76549 |
| H | +5.47425 | -1.80761 | +4.19206 |
| H | +5.72516 | -3.35583 | +3.34485 |
| H | +6.08776 | -1.80925 | +2.53598 |
| H | +1.66463 | -2.10286 | +2.47257 |
| H | +2.27902 | -1.55903 | +0.93909 |
| H | +1.96825 | +0.88543 | +1.89071 |
| H | +1.19129 | +0.13852 | +3.42277 |
| H | -0.53437 | +0.87954 | +1.87828 |
| H | -0.55397 | -0.86553 | +1.88716 |
| H | -1.01548 | +0.03399 | -0.38784 |
| H | +0.53466 | +0.86356 | -0.39023 |
| H | +0.47295 | -0.89308 | -0.40324 |
| H | +1.01931 | +0.17343 | +4.33997 |

\* E = +0.768 kcal/mol ; Conformer 006

|   |          |          |          |
|---|----------|----------|----------|
| C | +0.00000 | +0.00000 | +0.00000 |
| C | +0.00000 | +0.00000 | +1.51530 |
| C | +1.38075 | +0.00000 | +2.09861 |
| C | +1.48291 | +0.07262 | +3.59416 |
| C | +0.97184 | -1.14831 | +4.30709 |
| O | +1.27643 | -2.27158 | +3.66023 |
| C | +0.86439 | -3.46832 | +4.29773 |
| O | +0.37805 | -1.13767 | +5.35019 |
| H | +1.18037 | -4.27414 | +3.64816 |
| H | +1.33207 | -3.55723 | +5.27321 |
| H | -0.21362 | -3.47791 | +4.42378 |
| H | +2.52383 | +0.19587 | +3.89517 |
| H | +0.93133 | +0.91972 | +3.99270 |
| H | +2.04454 | -0.73645 | +1.65499 |
| H | +1.93429 | +1.14823 | +1.68249 |
| H | -0.54991 | +0.86406 | +1.89133 |
| H | -0.53638 | -0.88095 | +1.88154 |
| H | -1.01240 | -0.00117 | -0.39531 |
| H | +0.50986 | +0.87908 | -0.38848 |
| H | +0.51049 | -0.87870 | -0.38933 |
| H | +2.28928 | +1.96990 | +1.43045 |

\* E = +0.825 kcal/mol ; Conformer 007

|   |          |          |          |
|---|----------|----------|----------|
| C | +0.00000 | +0.00000 | +0.00000 |
|---|----------|----------|----------|

|   |          |          |          |
|---|----------|----------|----------|
| C | +0.00000 | +0.00000 | +1.51629 |
| C | +1.37183 | +0.00000 | +2.13029 |
| C | +2.37215 | +1.01783 | +1.63786 |
| C | +1.88410 | +2.40253 | +1.93829 |
| O | +2.34242 | +2.85549 | +3.10251 |
| C | +1.87587 | +4.13930 | +3.47996 |
| O | +1.12933 | +3.03003 | +1.24387 |
| H | +2.33973 | +4.35435 | +4.43369 |
| H | +2.16335 | +4.87843 | +2.73897 |
| H | +0.79427 | +4.13711 | +3.57188 |
| H | +3.33339 | +0.85761 | +2.11686 |
| H | +2.49346 | +0.93923 | +0.56113 |
| H | +1.36341 | -0.08854 | +3.21333 |
| H | +1.90852 | -1.16170 | +1.77947 |
| H | -0.55050 | +0.87442 | +1.87342 |
| H | -0.53879 | -0.87008 | +1.89097 |
| H | -1.01002 | -0.11684 | -0.38390 |
| H | +0.39180 | +0.93568 | -0.39057 |
| H | +0.60178 | -0.81878 | -0.39181 |
| H | +2.28575 | -1.97540 | +1.50296 |

\* E = +0.891 kcal/mol ; Conformer 008

|   |          |          |          |
|---|----------|----------|----------|
| C | +0.00000 | +0.00000 | +0.00000 |
| C | +0.00000 | +0.00000 | +1.52170 |
| C | +1.38057 | +0.00000 | +2.11118 |
| C | +2.24725 | -1.19122 | +1.82941 |
| C | +3.05788 | -1.04299 | +0.57365 |
| O | +3.49296 | -2.21956 | +0.13111 |
| C | +4.31768 | -2.16743 | -1.02061 |
| O | +3.32065 | -0.00324 | +0.03304 |
| H | +5.20744 | -1.57819 | -0.82237 |
| H | +4.58093 | -3.19333 | -1.24251 |
| H | +3.77932 | -1.72202 | -1.85116 |
| H | +2.96918 | -1.34200 | +2.63500 |
| H | +1.66850 | -2.11076 | +1.76725 |
| H | +1.91509 | +0.93731 | +1.98733 |
| H | +1.19053 | -0.02827 | +3.43586 |
| H | -0.53882 | +0.87405 | +1.88488 |
| H | -0.54572 | -0.87298 | +1.88365 |
| H | -1.01560 | +0.06194 | -0.38434 |
| H | +0.56942 | +0.83849 | -0.39301 |
| H | +0.44409 | -0.91109 | -0.39758 |
| H | +1.06505 | -0.08629 | +4.35303 |

\* E = +0.945 kcal/mol ; Conformer 009

|   |          |          |          |
|---|----------|----------|----------|
| C | +0.00000 | +0.00000 | +0.00000 |
| C | +0.00000 | +0.00000 | +1.51550 |
| C | +1.38371 | +0.00000 | +2.09356 |

|   |          |          |          |
|---|----------|----------|----------|
| C | +1.50671 | +0.07336 | +3.59379 |
| C | +1.08003 | -1.22584 | +4.21069 |
| O | -0.16510 | -1.17502 | +4.67959 |
| C | -0.64941 | -2.38311 | +5.24101 |
| O | +1.75408 | -2.21933 | +4.25398 |
| H | -0.02793 | -2.68592 | +6.07770 |
| H | -1.65835 | -2.17295 | +5.57100 |
| H | -0.64590 | -3.17435 | +4.49783 |
| H | +2.54340 | +0.23971 | +3.87374 |
| H | +0.89543 | +0.88187 | +3.98580 |
| H | +2.04888 | -0.73804 | +1.65210 |
| H | +1.93023 | +1.13983 | +1.67502 |
| H | -0.54477 | +0.86661 | +1.89283 |
| H | -0.54496 | -0.87367 | +1.88404 |
| H | -1.01276 | +0.00329 | -0.39435 |
| H | +0.51324 | +0.87680 | -0.38917 |
| H | +0.50608 | -0.88078 | -0.39032 |
| H | +2.28261 | +1.96790 | +1.42312 |

\* E = +1.014 kcal/mol ; Conformer 010

|   |          |          |          |
|---|----------|----------|----------|
| C | +0.00000 | +0.00000 | +0.00000 |
| C | +0.00000 | +0.00000 | +1.51550 |
| C | +1.38180 | +0.00000 | +2.09658 |
| C | +1.46798 | +0.05706 | +3.59251 |
| C | +2.84899 | +0.22244 | +4.15382 |
| O | +3.77765 | -0.36017 | +3.40091 |
| C | +5.10366 | -0.26155 | +3.89084 |
| O | +3.10197 | +0.78608 | +5.18334 |
| H | +5.18243 | -0.73235 | +4.86570 |
| H | +5.72538 | -0.77297 | +3.16765 |
| H | +5.39596 | +0.77988 | +3.97872 |
| H | +0.86537 | +0.86610 | +3.99722 |
| H | +1.06955 | -0.86668 | +4.02342 |
| H | +2.05602 | -0.72514 | +1.65098 |
| H | +1.92568 | +1.14818 | +1.68336 |
| H | -0.54765 | +0.86693 | +1.88844 |
| H | -0.54243 | -0.87632 | +1.88371 |
| H | -1.01240 | +0.00185 | -0.39540 |
| H | +0.51234 | +0.87789 | -0.38754 |
| H | +0.50836 | -0.87951 | -0.39029 |
| H | +2.26500 | +1.98475 | +1.44120 |

\* E = +1.041 kcal/mol ; Conformer 011

|   |          |          |          |
|---|----------|----------|----------|
| C | +0.00000 | +0.00000 | +0.00000 |
| C | +0.00000 | +0.00000 | +1.51636 |
| C | +1.37093 | +0.00000 | +2.13243 |
| C | +2.36853 | +1.03418 | +1.67163 |
| C | +1.93363 | +2.40362 | +2.10085 |

|   |          |          |          |
|---|----------|----------|----------|
| O | +1.15373 | +2.98513 | +1.18971 |
| C | +0.66175 | +4.26653 | +1.54324 |
| O | +2.20807 | +2.92075 | +3.14942 |
| H | +0.05563 | +4.59242 | +0.70806 |
| H | +0.06628 | +4.20712 | +2.44894 |
| H | +1.48501 | +4.95391 | +1.70984 |
| H | +3.33497 | +0.84208 | +2.12737 |
| H | +2.47380 | +1.00987 | +0.59031 |
| H | +1.36069 | -0.11036 | +3.21312 |
| H | +1.91544 | -1.15343 | +1.75782 |
| H | -0.55595 | +0.86930 | +1.87880 |
| H | -0.53725 | -0.87261 | +1.88704 |
| H | -1.01102 | -0.10416 | -0.38522 |
| H | +0.40739 | +0.92703 | -0.39559 |
| H | +0.59119 | -0.82718 | -0.38947 |
| H | +2.29705 | -1.95867 | +1.46882 |

\* E = +1.050 kcal/mol ; Conformer 012

|   |          |          |          |
|---|----------|----------|----------|
| C | +0.00000 | +0.00000 | +0.00000 |
| C | +0.00000 | +0.00000 | +1.51556 |
| C | +1.38547 | +0.00000 | +2.08928 |
| C | +1.53291 | +0.01174 | +3.58019 |
| C | +0.94932 | +1.21735 | +4.25748 |
| O | +1.03289 | +1.10470 | +5.58200 |
| C | +0.52956 | +2.20642 | +6.31679 |
| O | +0.47448 | +2.17558 | +3.71340 |
| H | -0.52393 | +2.35558 | +6.10181 |
| H | +0.67410 | +1.95750 | +7.36000 |
| H | +1.07141 | +3.11149 | +6.06083 |
| H | +1.06956 | -0.86990 | +4.03020 |
| H | +2.58248 | -0.03513 | +3.86889 |
| H | +2.04356 | -0.72883 | +1.62220 |
| H | +1.95480 | +1.14997 | +1.66471 |
| H | -0.54298 | +0.86497 | +1.89044 |
| H | -0.53229 | -0.88421 | +1.88242 |
| H | -1.01285 | -0.00917 | -0.39435 |
| H | +0.49970 | +0.88600 | -0.38551 |
| H | +0.51862 | -0.87224 | -0.39469 |
| H | +2.34966 | +1.93447 | +1.38620 |

\* E = +1.278 kcal/mol ; Conformer 013

|   |          |          |          |
|---|----------|----------|----------|
| C | +0.00000 | +0.00000 | +0.00000 |
| C | +0.00000 | +0.00000 | +1.52227 |
| C | +1.37735 | +0.00000 | +2.12029 |
| C | +2.20962 | -1.24163 | +1.95939 |
| C | +2.82499 | -1.41138 | +0.59927 |
| O | +3.35508 | -0.27788 | +0.14546 |
| C | +3.97740 | -0.36611 | -1.12422 |



|   |          |          |          |
|---|----------|----------|----------|
| O | +2.86692 | -2.44232 | -0.01509 |
| H | +4.35751 | +0.62442 | -1.33767 |
| H | +4.78589 | -1.08986 | -1.10071 |
| H | +3.25643 | -0.66960 | -1.87705 |
| H | +3.03731 | -1.22231 | +2.67027 |
| H | +1.63071 | -2.13897 | +2.15856 |
| H | +1.93872 | +0.91051 | +1.93068 |
| H | +1.18020 | +0.08322 | +3.43417 |
| H | -0.53548 | +0.87828 | +1.88131 |
| H | -0.55081 | -0.86849 | +1.88539 |
| H | -1.01414 | +0.08616 | -0.38332 |
| H | +0.57927 | +0.83428 | -0.39050 |
| H | +0.42112 | -0.91886 | -0.40239 |
| H | +1.03879 | +0.11224 | +4.35695 |

\* E = +1.492 kcal/mol ; Conformer 014

|   |          |          |          |
|---|----------|----------|----------|
| C | +0.00000 | +0.00000 | +0.00000 |
| C | +0.00000 | +0.00000 | +1.52132 |
| C | +1.38067 | +0.00000 | +2.11030 |
| C | +2.18770 | -1.25099 | +1.92043 |
| C | +3.47293 | -1.30427 | +2.69146 |
| O | +4.04637 | -0.10943 | +2.80400 |
| C | +5.27929 | -0.09294 | +3.50235 |
| O | +3.96055 | -2.30739 | +3.13582 |
| H | +5.60137 | +0.94017 | +3.51034 |
| H | +5.14335 | -0.45951 | +4.51472 |
| H | +6.00851 | -0.71821 | +2.99687 |
| H | +1.61961 | -2.13730 | +2.19138 |
| H | +2.46001 | -1.36750 | +0.86731 |
| H | +1.94686 | +0.90704 | +1.92133 |
| H | +1.19417 | +0.08539 | +3.42911 |
| H | -0.53613 | +0.87739 | +1.88096 |
| H | -0.54958 | -0.86863 | +1.88602 |
| H | -1.01521 | +0.03979 | -0.38775 |
| H | +0.53961 | +0.86019 | -0.39144 |
| H | +0.46778 | -0.89675 | -0.40096 |
| H | +1.04631 | +0.10132 | +4.35062 |

\* E = +1.629 kcal/mol ; Conformer 015

|   |          |          |          |
|---|----------|----------|----------|
| C | +0.00000 | +0.00000 | +0.00000 |
| C | +0.00000 | +0.00000 | +1.52190 |
| C | +1.38454 | +0.00000 | +2.10398 |
| C | +2.24526 | -1.21184 | +1.90669 |
| C | +1.67332 | -2.48149 | +2.46528 |
| O | +2.40916 | -3.53306 | +2.10857 |
| C | +1.97054 | -4.78023 | +2.61774 |
| O | +0.69713 | -2.57363 | +3.15704 |
| H | +0.96478 | -4.99780 | +2.27219 |

|   |          |          |          |
|---|----------|----------|----------|
| H | +2.66995 | -5.51585 | +2.24248 |
| H | +1.97352 | -4.76829 | +3.70317 |
| H | +2.46311 | -1.38499 | +0.85072 |
| H | +3.21793 | -1.07227 | +2.37853 |
| H | +1.93361 | +0.91616 | +1.90049 |
| H | +1.22253 | +0.10520 | +3.43991 |
| H | -0.52559 | +0.88454 | +1.87973 |
| H | -0.54881 | -0.86118 | +1.89574 |
| H | -1.01590 | +0.04006 | -0.38626 |
| H | +0.54016 | +0.85820 | -0.39618 |
| H | +0.46442 | -0.89848 | -0.40204 |
| H | +1.12452 | +0.18584 | +4.35087 |

\* E = +1.679 kcal/mol ; Conformer 016

|   |          |          |          |
|---|----------|----------|----------|
| C | +0.00000 | +0.00000 | +0.00000 |
| C | +0.00000 | +0.00000 | +1.51727 |
| C | +1.36733 | +0.00000 | +2.13959 |
| C | +2.32002 | +1.07241 | +1.69933 |
| C | +3.68643 | +1.00719 | +2.31460 |
| O | +3.66162 | +0.56758 | +3.56975 |
| C | +4.92128 | +0.51137 | +4.21646 |
| O | +4.69786 | +1.34332 | +1.76162 |
| H | +4.72704 | +0.13105 | +5.21081 |
| H | +5.59205 | -0.14999 | +3.67755 |
| H | +5.36609 | +1.50036 | +4.26409 |
| H | +2.46695 | +1.07365 | +0.62349 |
| H | +1.91315 | +2.05603 | +1.95672 |
| H | +1.35918 | -0.14162 | +3.21495 |
| H | +1.92915 | -1.14642 | +1.73634 |
| H | -0.55575 | +0.86908 | +1.88311 |
| H | -0.54141 | -0.87248 | +1.88127 |
| H | -1.01113 | -0.09758 | -0.38651 |
| H | +0.41452 | +0.91962 | -0.40652 |
| H | +0.58718 | -0.83026 | -0.38792 |
| H | +2.31920 | -1.93420 | +1.42104 |

\* E = +1.733 kcal/mol ; Conformer 017

|   |          |          |          |
|---|----------|----------|----------|
| C | +0.00000 | +0.00000 | +0.00000 |
| C | +0.00000 | +0.00000 | +1.51547 |
| C | +1.38289 | +0.00000 | +2.09496 |
| C | +1.50853 | +0.00222 | +3.59300 |
| C | +0.67574 | +1.03230 | +4.29827 |
| O | +0.78500 | +2.23333 | +3.73933 |
| C | +0.05296 | +3.26817 | +4.37136 |
| O | +0.00214 | +0.82243 | +5.27053 |
| H | +0.38292 | +3.39217 | +5.39805 |
| H | +0.24967 | +4.16341 | +3.79618 |
| H | -1.00780 | +3.03715 | +4.37008 |

|   |          |          |          |
|---|----------|----------|----------|
| H | +1.22220 | -0.96206 | +4.01062 |
| H | +2.54673 | +0.17703 | +3.87745 |
| H | +2.04390 | -0.73072 | +1.63501 |
| H | +1.95598 | +1.14215 | +1.65525 |
| H | -0.54523 | +0.86898 | +1.88571 |
| H | -0.54110 | -0.87639 | +1.88538 |
| H | -1.01260 | +0.00161 | -0.39482 |
| H | +0.51231 | +0.87788 | -0.38741 |
| H | +0.50765 | -0.87979 | -0.39113 |
| H | +2.35180 | +1.91249 | +1.34168 |

\* E = +1.905 kcal/mol ; Conformer 018

|   |          |          |          |
|---|----------|----------|----------|
| C | +0.00000 | +0.00000 | +0.00000 |
| C | +0.00000 | +0.00000 | +1.52166 |
| C | +1.38327 | +0.00000 | +2.10541 |
| C | +2.26361 | -1.18649 | +1.80336 |
| C | +1.53765 | -2.49100 | +1.93684 |
| O | +1.16657 | -2.72314 | +3.19163 |
| C | +0.45037 | -3.92663 | +3.40376 |
| O | +1.29373 | -3.24319 | +1.03175 |
| H | +0.22474 | -3.95406 | +4.46169 |
| H | -0.46328 | -3.93194 | +2.81741 |
| H | +1.05481 | -4.78196 | +3.11845 |
| H | +2.64005 | -1.13934 | +0.78316 |
| H | +3.11985 | -1.19121 | +2.47635 |
| H | +1.91454 | +0.93848 | +1.96859 |
| H | +1.20977 | +0.01131 | +3.44123 |
| H | -0.53858 | +0.87109 | +1.89205 |
| H | -0.54574 | -0.87315 | +1.88360 |
| H | -1.01557 | +0.04857 | -0.38573 |
| H | +0.54610 | +0.85623 | -0.39191 |
| H | +0.45866 | -0.90466 | -0.39293 |
| H | +1.08606 | +0.03422 | +4.35472 |

\* E = +2.343 kcal/mol ; Conformer 019

|   |          |          |          |
|---|----------|----------|----------|
| C | +0.00000 | +0.00000 | +0.00000 |
| C | +0.00000 | +0.00000 | +1.52097 |
| C | +1.38261 | +0.00000 | +2.10636 |
| C | +2.25645 | -1.20609 | +1.86340 |
| C | +1.56785 | -2.48358 | +2.23948 |
| O | +0.98368 | -3.06147 | +1.18930 |
| C | +0.27788 | -4.25719 | +1.47259 |
| O | +1.51338 | -2.94046 | +3.34762 |
| H | -0.51654 | -4.06754 | +2.18778 |
| H | -0.13029 | -4.59206 | +0.52794 |
| H | +0.94952 | -5.00316 | +1.88557 |
| H | +2.54441 | -1.25603 | +0.81328 |
| H | +3.15915 | -1.13177 | +2.46344 |

|   |          |          |          |
|---|----------|----------|----------|
| H | +1.92541 | +0.92596 | +1.93394 |
| H | +1.20619 | +0.05858 | +3.44089 |
| H | -0.53270 | +0.87634 | +1.88809 |
| H | -0.55295 | -0.86761 | +1.88301 |
| H | -1.01525 | +0.04896 | -0.38700 |
| H | +0.54631 | +0.85619 | -0.39178 |
| H | +0.45945 | -0.90467 | -0.39111 |
| H | +1.06801 | +0.10197 | +4.35246 |

\* E = +3.024 kcal/mol ; Conformer 020

|   |          |          |          |
|---|----------|----------|----------|
| C | +0.00000 | +0.00000 | +0.00000 |
| C | +0.00000 | +0.00000 | +1.51826 |
| C | +1.35691 | +0.00000 | +2.16548 |
| C | +2.30022 | +1.14507 | +1.90687 |
| C | +2.72782 | +1.35863 | +0.48468 |
| O | +3.20284 | +0.24776 | -0.06664 |
| C | +3.61680 | +0.36779 | -1.41514 |
| O | +2.68196 | +2.40991 | -0.09618 |
| H | +3.98725 | -0.60842 | -1.69946 |
| H | +2.77668 | +0.65444 | -2.04126 |
| H | +4.39621 | +1.11729 | -1.50879 |
| H | +1.86044 | +2.08514 | +2.23915 |
| H | +3.21043 | +0.99410 | +2.48717 |
| H | +1.30420 | -0.22118 | +3.22777 |
| H | +1.95002 | -1.14177 | +1.73159 |
| H | -0.56393 | +0.86424 | +1.88268 |
| H | -0.53782 | -0.87776 | +1.87513 |
| H | -1.01109 | -0.12653 | -0.37885 |
| H | +0.38027 | +0.93249 | -0.41020 |
| H | +0.60981 | -0.81461 | -0.38533 |
| H | +2.29610 | -1.94848 | +1.46465 |

\* E = +3.037 kcal/mol ; Conformer 021

|   |          |          |          |
|---|----------|----------|----------|
| C | +0.00000 | +0.00000 | +0.00000 |
| C | +0.00000 | +0.00000 | +1.51634 |
| C | +1.36119 | +0.00000 | +2.15314 |
| C | +2.34794 | +1.04814 | +1.72437 |
| C | +2.97906 | +0.83811 | +0.37705 |
| O | +3.31932 | +2.00051 | -0.17952 |
| C | +3.99058 | +1.90074 | -1.42318 |
| O | +3.20277 | -0.22082 | -0.13934 |
| H | +3.36132 | +1.40162 | -2.15340 |
| H | +4.19852 | +2.91749 | -1.73006 |
| H | +4.91224 | +1.33807 | -1.31230 |
| H | +1.89530 | +2.04128 | +1.73421 |
| H | +3.17777 | +1.08938 | +2.43031 |
| H | +1.30941 | -0.08512 | +3.23434 |
| H | +1.88818 | -1.22233 | +1.86229 |

|   |          |          |          |
|---|----------|----------|----------|
| H | -0.55513 | +0.87099 | +1.87934 |
| H | -0.54472 | -0.87100 | +1.88018 |
| H | -1.01534 | -0.07000 | -0.38233 |
| H | +0.43183 | +0.91536 | -0.40224 |
| H | +0.57502 | -0.83581 | -0.39037 |
| H | +2.16996 | -2.07656 | +1.70822 |

\* E = +3.988 kcal/mol ; Conformer 022

|   |          |          |          |
|---|----------|----------|----------|
| C | +0.00000 | +0.00000 | +0.00000 |
| C | +0.00000 | +0.00000 | +1.51669 |
| C | +1.37369 | +0.00000 | +2.12652 |
| C | +2.28919 | +1.16447 | +1.79286 |
| C | +3.53097 | +0.73633 | +1.06534 |
| O | +3.26580 | +0.39978 | -0.19422 |
| C | +4.36617 | -0.10120 | -0.93227 |
| O | +4.63084 | +0.67893 | +1.54235 |
| H | +3.98415 | -0.32411 | -1.91998 |
| H | +5.15646 | +0.64092 | -0.98550 |
| H | +4.75548 | -0.99888 | -0.46193 |
| H | +1.76330 | +1.88183 | +1.16460 |
| H | +2.61453 | +1.67038 | +2.69565 |
| H | +1.37469 | -0.23786 | +3.18522 |
| H | +1.93528 | -1.10522 | +1.64829 |
| H | -0.54785 | +0.87280 | +1.88568 |
| H | -0.54253 | -0.87103 | +1.88254 |
| H | -1.01588 | -0.01187 | -0.38669 |
| H | +0.50098 | +0.87573 | -0.40568 |
| H | +0.52263 | -0.87338 | -0.38370 |
| H | +2.32289 | -1.88917 | +1.30105 |

\* E = +8.033 kcal/mol ; Conformer 023

|   |          |          |          |
|---|----------|----------|----------|
| C | +0.00000 | +0.00000 | +0.00000 |
| C | +0.00000 | +0.00000 | +1.51515 |
| C | +1.38087 | +0.00000 | +2.09555 |
| C | +1.49263 | +0.06583 | +3.58788 |
| C | +1.14379 | -1.24962 | +4.24074 |
| O | +1.13121 | -1.29604 | +5.57781 |
| C | +1.40539 | -0.15333 | +6.35563 |
| O | +0.89315 | -2.24334 | +3.62378 |
| H | +0.64988 | +0.61619 | +6.21477 |
| H | +1.38073 | -0.48641 | +7.38556 |
| H | +2.38943 | +0.25541 | +6.13932 |
| H | +2.50755 | +0.33300 | +3.88737 |
| H | +0.84591 | +0.84866 | +3.98595 |
| H | +2.04294 | -0.73818 | +1.65229 |
| H | +1.93563 | +1.15373 | +1.68370 |
| H | -0.54747 | +0.86757 | +1.88902 |
| H | -0.52544 | -0.88321 | +1.88561 |

|   |          |          |          |
|---|----------|----------|----------|
| H | -1.01298 | +0.00162 | -0.39377 |
| H | +0.51314 | +0.87612 | -0.39160 |
| H | +0.50470 | -0.88278 | -0.38700 |
| H | +2.29541 | +1.97529 | +1.44566 |

\* E = +8.510 kcal/mol ; Conformer 024

|   |          |          |          |
|---|----------|----------|----------|
| C | +0.00000 | +0.00000 | +0.00000 |
| C | +0.00000 | +0.00000 | +1.51554 |
| C | +1.38252 | +0.00000 | +2.09372 |
| C | +1.47642 | +0.07582 | +3.58510 |
| C | +2.89624 | -0.03556 | +4.07600 |
| O | +3.12112 | +0.16951 | +5.37946 |
| C | +2.08174 | +0.53874 | +6.25555 |
| O | +3.81535 | -0.31899 | +3.36642 |
| H | +1.26354 | -0.17739 | +6.23807 |
| H | +2.52076 | +0.54759 | +7.24533 |
| H | +1.70413 | +1.53309 | +6.02780 |
| H | +1.02797 | +1.00101 | +3.94942 |
| H | +0.89783 | -0.73055 | +4.04781 |
| H | +2.06471 | -0.72342 | +1.65917 |
| H | +1.92038 | +1.14844 | +1.68114 |
| H | -0.54948 | +0.86717 | +1.88689 |
| H | -0.54239 | -0.87683 | +1.88284 |
| H | -1.01229 | -0.00081 | -0.39566 |
| H | +0.51090 | +0.87879 | -0.38712 |
| H | +0.51147 | -0.87795 | -0.38909 |
| H | +2.21714 | +2.00259 | +1.45221 |

\* E = +8.672 kcal/mol ; Conformer 025

|   |          |          |          |
|---|----------|----------|----------|
| C | +0.00000 | +0.00000 | +0.00000 |
| C | +0.00000 | +0.00000 | +1.51668 |
| C | +1.36736 | +0.00000 | +2.13722 |
| C | +2.36703 | +1.01209 | +1.66409 |
| C | +2.00921 | +2.41276 | +2.09662 |
| O | +2.78340 | +3.41452 | +1.66284 |
| C | +3.88197 | +3.17904 | +0.81227 |
| O | +1.08303 | +2.66430 | +2.81085 |
| H | +3.56316 | +2.79922 | -0.15575 |
| H | +4.35749 | +4.14181 | +0.67325 |
| H | +4.59721 | +2.49192 | +1.25772 |
| H | +3.35607 | +0.77859 | +2.06170 |
| H | +2.46987 | +0.98383 | +0.57973 |
| H | +1.34600 | -0.09029 | +3.21855 |
| H | +1.91486 | -1.17313 | +1.77901 |
| H | -0.54297 | +0.87018 | +1.89043 |
| H | -0.53775 | -0.87491 | +1.88071 |
| H | -1.01095 | -0.10492 | -0.38471 |
| H | +0.39983 | +0.92698 | -0.40656 |

|   |          |          |          |
|---|----------|----------|----------|
| H | +0.59311 | -0.82387 | -0.39438 |
| H | +2.29996 | -1.97462 | +1.50741 |

\* E = +9.052 kcal/mol ; Conformer 026

|   |          |          |          |
|---|----------|----------|----------|
| C | +0.00000 | +0.00000 | +0.00000 |
| C | +0.00000 | +0.00000 | +1.51735 |
| C | +1.36880 | +0.00000 | +2.13370 |
| C | +2.32283 | +1.05742 | +1.67085 |
| C | +3.57794 | +1.09650 | +2.50328 |
| O | +4.56500 | +1.90525 | +2.09887 |
| C | +4.46557 | +2.64900 | +0.90685 |
| O | +3.72266 | +0.46381 | +3.50701 |
| H | +3.58535 | +3.28757 | +0.89999 |
| H | +5.35160 | +3.27057 | +0.87356 |
| H | +4.45580 | +2.00106 | +0.03319 |
| H | +2.58461 | +0.91495 | +0.62218 |
| H | +1.85477 | +2.04662 | +1.72211 |
| H | +1.38307 | -0.13217 | +3.20963 |
| H | +1.92825 | -1.14354 | +1.72970 |
| H | -0.55417 | +0.87029 | +1.88291 |
| H | -0.54250 | -0.87113 | +1.88227 |
| H | -1.01133 | -0.08081 | -0.38975 |
| H | +0.43049 | +0.91417 | -0.40440 |
| H | +0.57475 | -0.83917 | -0.38766 |
| H | +2.31084 | -1.91737 | +1.37643 |

\* E = +9.063 kcal/mol ; Conformer 027

|   |          |          |          |
|---|----------|----------|----------|
| C | +0.00000 | +0.00000 | +0.00000 |
| C | +0.00000 | +0.00000 | +1.52129 |
| C | +1.37935 | +0.00000 | +2.11300 |
| C | +2.15947 | -1.27285 | +2.00005 |
| C | +3.55906 | -1.13412 | +2.53972 |
| O | +4.29830 | -2.24528 | +2.64352 |
| C | +3.77254 | -3.51111 | +2.31911 |
| O | +4.04112 | -0.08588 | +2.85189 |
| H | +3.38753 | -3.54145 | +1.30250 |
| H | +4.60071 | -4.20367 | +2.40269 |
| H | +2.99211 | -3.80816 | +3.01619 |
| H | +1.63994 | -2.08358 | +2.51265 |
| H | +2.23909 | -1.59089 | +0.95575 |
| H | +1.97279 | +0.88076 | +1.89050 |
| H | +1.19014 | +0.14177 | +3.42379 |
| H | -0.53287 | +0.88073 | +1.87740 |
| H | -0.55688 | -0.86362 | +1.88791 |
| H | -1.01532 | +0.03407 | -0.38813 |
| H | +0.53477 | +0.86349 | -0.38988 |
| H | +0.47286 | -0.89279 | -0.40455 |
| H | +1.00734 | +0.16875 | +4.33699 |

\* E = +9.089 kcal/mol ; Conformer 028

|   |          |          |          |
|---|----------|----------|----------|
| C | +0.00000 | +0.00000 | +0.00000 |
| C | +0.00000 | +0.00000 | +1.52135 |
| C | +1.37863 | +0.00000 | +2.11560 |
| C | +2.23967 | -1.20071 | +1.85415 |
| C | +3.11640 | -1.03332 | +0.63676 |
| O | +3.81678 | -2.09744 | +0.22657 |
| C | +3.71963 | -3.34119 | +0.88197 |
| O | +3.23197 | -0.00141 | +0.04349 |
| H | +2.73201 | -3.78010 | +0.75944 |
| H | +4.45071 | -3.98196 | +0.40516 |
| H | +3.95613 | -3.26037 | +1.94006 |
| H | +2.90203 | -1.38876 | +2.70308 |
| H | +1.62872 | -2.09761 | +1.75018 |
| H | +1.91935 | +0.93180 | +1.98289 |
| H | +1.18263 | -0.01615 | +3.43559 |
| H | -0.53845 | +0.87434 | +1.88429 |
| H | -0.54718 | -0.87187 | +1.88498 |
| H | -1.01726 | +0.04616 | -0.38217 |
| H | +0.55766 | +0.84571 | -0.39271 |
| H | +0.46111 | -0.90103 | -0.40027 |
| H | +1.05722 | -0.07166 | +4.35635 |

\* E = +9.346 kcal/mol ; Conformer 029

|   |          |          |          |
|---|----------|----------|----------|
| C | +0.00000 | +0.00000 | +0.00000 |
| C | +0.00000 | +0.00000 | +1.51637 |
| C | +1.37218 | +0.00000 | +2.13013 |
| C | +2.35695 | +1.04275 | +1.65504 |
| C | +1.82677 | +2.42343 | +1.94930 |
| O | +2.10845 | +2.98885 | +3.12856 |
| C | +2.99564 | +2.38785 | +4.04382 |
| O | +1.11074 | +3.00493 | +1.18586 |
| H | +4.01254 | +2.37491 | +3.65848 |
| H | +2.96391 | +3.00635 | +4.93218 |
| H | +2.68695 | +1.37863 | +4.30430 |
| H | +3.33159 | +0.87011 | +2.10254 |
| H | +2.46677 | +0.98442 | +0.57651 |
| H | +1.35664 | -0.11975 | +3.21092 |
| H | +1.92355 | -1.14504 | +1.75649 |
| H | -0.54990 | +0.87426 | +1.87424 |
| H | -0.53662 | -0.87117 | +1.89115 |
| H | -1.01056 | -0.11815 | -0.38178 |
| H | +0.38895 | +0.93664 | -0.39039 |
| H | +0.60168 | -0.81872 | -0.39217 |
| H | +2.31655 | -1.94898 | +1.46604 |

\* E = +9.346 kcal/mol ; Conformer 030



|   |          |          |          |
|---|----------|----------|----------|
| C | +0.00000 | +0.00000 | +0.00000 |
| C | +0.00000 | +0.00000 | +1.51513 |
| C | +1.38456 | +0.00000 | +2.09114 |
| C | +1.49892 | +0.04159 | +3.59606 |
| C | +1.00682 | -1.25560 | +4.18707 |
| O | +1.87373 | -2.26349 | +4.34278 |
| C | +3.25309 | -2.09829 | +4.10612 |
| O | -0.14318 | -1.43434 | +4.46651 |
| H | +3.70129 | -1.42551 | +4.83367 |
| H | +3.69014 | -3.08242 | +4.22137 |
| H | +3.45272 | -1.73838 | +3.09997 |
| H | +2.51972 | +0.26547 | +3.89404 |
| H | +0.85094 | +0.81958 | +3.98896 |
| H | +2.05027 | -0.72046 | +1.61868 |
| H | +1.92386 | +1.14243 | +1.70092 |
| H | -0.53949 | +0.86946 | +1.89273 |
| H | -0.54461 | -0.86822 | +1.89292 |
| H | -1.01359 | +0.00831 | -0.39158 |
| H | +0.51678 | +0.87363 | -0.39234 |
| H | +0.49828 | -0.88481 | -0.39204 |
| H | +2.27964 | +1.98203 | +1.46358 |

\* E = +9.498 kcal/mol ; Conformer 031

|   |          |          |          |
|---|----------|----------|----------|
| C | +0.00000 | +0.00000 | +0.00000 |
| C | +0.00000 | +0.00000 | +1.51558 |
| C | +1.38628 | +0.00000 | +2.08668 |
| C | +1.53773 | +0.00716 | +3.57845 |
| C | +0.97026 | +1.23348 | +4.24827 |
| O | +1.01532 | +1.27703 | +5.58689 |
| C | +1.55882 | +0.22246 | +6.34563 |
| O | +0.49815 | +2.15899 | +3.65821 |
| H | +2.59820 | +0.03295 | +6.08792 |
| H | +1.50634 | +0.54599 | +7.37770 |
| H | +0.98097 | -0.69224 | +6.23310 |
| H | +1.06094 | -0.87735 | +4.01128 |
| H | +2.59104 | -0.06726 | +3.85097 |
| H | +2.04178 | -0.73151 | +1.61982 |
| H | +1.96268 | +1.14972 | +1.66051 |
| H | -0.54275 | +0.86399 | +1.89156 |
| H | -0.53078 | -0.88576 | +1.88167 |
| H | -1.01314 | -0.01179 | -0.39329 |
| H | +0.49629 | +0.88796 | -0.38519 |
| H | +0.52088 | -0.87046 | -0.39582 |
| H | +2.36591 | +1.92474 | +1.37830 |

\* E = +10.008 kcal/mol ; Conformer 032

|   |          |          |          |
|---|----------|----------|----------|
| C | +0.00000 | +0.00000 | +0.00000 |
| C | +0.00000 | +0.00000 | +1.52084 |

|   |          |          |          |
|---|----------|----------|----------|
| C | +1.38534 | +0.00000 | +2.10085 |
| C | +2.28688 | -1.17872 | +1.80785 |
| C | +1.61995 | -2.49963 | +2.09548 |
| O | +1.86523 | -3.12387 | +3.24924 |
| C | +2.80383 | -2.63337 | +4.18153 |
| O | +0.84838 | -2.99356 | +1.32331 |
| H | +2.57514 | -1.61606 | +4.48566 |
| H | +2.72633 | -3.28575 | +5.04241 |
| H | +3.81575 | -2.68909 | +3.78640 |
| H | +2.50899 | -1.19341 | +0.74085 |
| H | +3.23058 | -1.06243 | +2.33215 |
| H | +1.91424 | +0.93875 | +1.95410 |
| H | +1.19711 | +0.03679 | +3.43022 |
| H | -0.52367 | +0.88030 | +1.89144 |
| H | -0.55138 | -0.86921 | +1.87523 |
| H | -1.01444 | +0.08675 | -0.38135 |
| H | +0.57725 | +0.83364 | -0.39721 |
| H | +0.41658 | -0.92758 | -0.38390 |
| H | +1.02995 | +0.07998 | +4.34490 |

\* E = +10.061 kcal/mol ; Conformer 033

|   |          |          |          |
|---|----------|----------|----------|
| C | +0.00000 | +0.00000 | +0.00000 |
| C | +0.00000 | +0.00000 | +1.52190 |
| C | +1.38441 | +0.00000 | +2.10392 |
| C | +2.25285 | -1.20678 | +1.89982 |
| C | +1.69187 | -2.47539 | +2.49018 |
| O | +2.37872 | -3.60669 | +2.27896 |
| C | +3.57171 | -3.62125 | +1.53082 |
| O | +0.68792 | -2.52440 | +3.13639 |
| H | +4.32411 | -2.96158 | +1.95660 |
| H | +3.93332 | -4.64104 | +1.57451 |
| H | +3.39633 | -3.35368 | +0.49110 |
| H | +2.44228 | -1.36914 | +0.83533 |
| H | +3.23497 | -1.03716 | +2.34311 |
| H | +1.93139 | +0.91768 | +1.90085 |
| H | +1.22786 | +0.10140 | +3.44385 |
| H | -0.52169 | +0.88715 | +1.87881 |
| H | -0.54997 | -0.85919 | +1.89651 |
| H | -1.01577 | +0.04826 | -0.38530 |
| H | +0.54720 | +0.85309 | -0.39791 |
| H | +0.45389 | -0.90386 | -0.40261 |
| H | +1.13776 | +0.18315 | +4.35258 |

\* E = +10.120 kcal/mol ; Conformer 034

|   |          |          |          |
|---|----------|----------|----------|
| C | +0.00000 | +0.00000 | +0.00000 |
| C | +0.00000 | +0.00000 | +1.51531 |
| C | +1.38700 | +0.00000 | +2.08598 |
| C | +1.52969 | -0.01208 | +3.59070 |

|   |          |          |          |
|---|----------|----------|----------|
| C | +0.85117 | +1.17148 | +4.23430 |
| O | +1.57865 | +2.24217 | +4.56308 |
| C | +2.98203 | +2.26724 | +4.42478 |
| O | -0.32976 | +1.19203 | +4.43135 |
| H | +3.29066 | +2.05657 | +3.40477 |
| H | +3.28154 | +3.27552 | +4.68252 |
| H | +3.45720 | +1.57113 | +5.11255 |
| H | +1.01846 | -0.89050 | +3.98456 |
| H | +2.57634 | -0.08993 | +3.86719 |
| H | +2.04981 | -0.72076 | +1.61280 |
| H | +1.91863 | +1.15232 | +1.65046 |
| H | -0.55576 | +0.85469 | +1.89666 |
| H | -0.53017 | -0.88039 | +1.88953 |
| H | -1.01385 | -0.00575 | -0.39099 |
| H | +0.50141 | +0.88351 | -0.38990 |
| H | +0.51352 | -0.87474 | -0.39544 |
| H | +2.23756 | +1.97310 | +1.33690 |

\* E = +10.511 kcal/mol ; Conformer 035

|   |          |          |          |
|---|----------|----------|----------|
| C | +0.00000 | +0.00000 | +0.00000 |
| C | +0.00000 | +0.00000 | +1.52132 |
| C | +1.38443 | +0.00000 | +2.11437 |
| C | +1.99930 | -1.33709 | +2.46131 |
| C | +2.02328 | -2.26095 | +1.27006 |
| O | +3.04238 | -2.17874 | +0.40705 |
| C | +4.16906 | -1.37417 | +0.67142 |
| O | +1.13172 | -3.02617 | +1.04066 |
| H | +4.73654 | -1.75675 | +1.51665 |
| H | +4.78391 | -1.42820 | -0.21836 |
| H | +3.89446 | -0.33800 | +0.84938 |
| H | +2.98942 | -1.19779 | +2.88754 |
| H | +1.37812 | -1.83419 | +3.20095 |
| H | +2.06320 | +0.68147 | +1.60530 |
| H | +1.28360 | +0.58132 | +3.28054 |
| H | -0.53180 | +0.88456 | +1.87283 |
| H | -0.55065 | -0.86475 | +1.88926 |
| H | -1.01804 | +0.02974 | -0.38104 |
| H | +0.52356 | +0.87238 | -0.38754 |
| H | +0.47280 | -0.89012 | -0.40567 |
| H | +1.18591 | +0.97961 | +4.13904 |

\* E = +10.782 kcal/mol ; Conformer 036

|   |          |          |          |
|---|----------|----------|----------|
| C | +0.00000 | +0.00000 | +0.00000 |
| C | +0.00000 | +0.00000 | +1.52083 |
| C | +1.38674 | +0.00000 | +2.09749 |
| C | +2.21115 | -1.25527 | +1.88505 |
| C | +3.25198 | -1.05442 | +0.81590 |
| O | +4.34896 | -0.35582 | +1.13667 |

|   |          |          |          |
|---|----------|----------|----------|
| C | +4.65590 | -0.03876 | +2.47661 |
| O | +3.12066 | -1.44323 | -0.30785 |
| H | +4.89696 | -0.93451 | +3.04463 |
| H | +5.53162 | +0.59685 | +2.43390 |
| H | +3.85035 | +0.49979 | +2.96900 |
| H | +2.68075 | -1.56567 | +2.81842 |
| H | +1.57527 | -2.06985 | +1.55262 |
| H | +1.93101 | +0.91959 | +1.88994 |
| H | +1.23366 | +0.09317 | +3.39816 |
| H | -0.53727 | +0.87275 | +1.89012 |
| H | -0.53686 | -0.87511 | +1.88873 |
| H | -1.01767 | -0.00844 | -0.38321 |
| H | +0.49670 | +0.88609 | -0.38987 |
| H | +0.52107 | -0.86625 | -0.40013 |
| H | +1.15186 | +0.11614 | +4.34107 |

\* E = +10.887 kcal/mol ; Conformer 037

|   |          |          |          |
|---|----------|----------|----------|
| C | +0.00000 | +0.00000 | +0.00000 |
| C | +0.00000 | +0.00000 | +1.51539 |
| C | +1.38264 | +0.00000 | +2.09619 |
| C | +1.46511 | +0.07589 | +3.59992 |
| C | +2.89111 | +0.07413 | +4.08247 |
| O | +3.52882 | -1.10171 | +4.17393 |
| C | +2.84362 | -2.32613 | +4.04664 |
| O | +3.48803 | +1.07671 | +4.34056 |
| H | +2.30434 | -2.39784 | +3.10550 |
| H | +3.60629 | -3.09448 | +4.07550 |
| H | +2.15647 | -2.48000 | +4.87596 |
| H | +1.02334 | +1.00650 | +3.94491 |
| H | +0.89556 | -0.74121 | +4.04665 |
| H | +2.04867 | -0.73101 | +1.64267 |
| H | +1.92127 | +1.14877 | +1.66671 |
| H | -0.54175 | +0.87033 | +1.88865 |
| H | -0.54556 | -0.87349 | +1.88538 |
| H | -1.01274 | +0.00502 | -0.39411 |
| H | +0.51458 | +0.87639 | -0.38735 |
| H | +0.50476 | -0.88112 | -0.39162 |
| H | +2.22564 | +1.98126 | +1.38841 |

\* E = +11.287 kcal/mol ; Conformer 038

|   |          |          |          |
|---|----------|----------|----------|
| C | +0.00000 | +0.00000 | +0.00000 |
| C | +0.00000 | +0.00000 | +1.52073 |
| C | +1.38424 | +0.00000 | +2.10310 |
| C | +2.12941 | -1.31261 | +2.04788 |
| C | +3.57787 | -1.14284 | +2.41461 |
| O | +4.40702 | -0.64915 | +1.48281 |
| C | +4.01297 | -0.52853 | +0.13515 |
| O | +4.00693 | -1.37769 | +3.50497 |

|   |          |          |          |
|---|----------|----------|----------|
| H | +3.10643 | +0.06166 | +0.02259 |
| H | +4.82895 | -0.02282 | -0.36618 |
| H | +3.87093 | -1.50650 | -0.32021 |
| H | +1.70297 | -2.01002 | +2.76378 |
| H | +2.03071 | -1.76216 | +1.05857 |
| H | +1.97590 | +0.86512 | +1.81082 |
| H | +1.21240 | +0.23895 | +3.40460 |
| H | -0.53559 | +0.87820 | +1.87943 |
| H | -0.54703 | -0.86747 | +1.89094 |
| H | -1.01471 | -0.00329 | -0.39075 |
| H | +0.50097 | +0.88459 | -0.38954 |
| H | +0.50603 | -0.87533 | -0.40384 |
| H | +1.03248 | +0.37217 | +4.30631 |

\* E = +11.392 kcal/mol ; Conformer 039

|   |          |          |          |
|---|----------|----------|----------|
| C | +0.00000 | +0.00000 | +0.00000 |
| C | +0.00000 | +0.00000 | +1.51670 |
| C | +1.37378 | +0.00000 | +2.12499 |
| C | +2.33079 | +1.06058 | +1.63641 |
| C | +3.61011 | +1.05418 | +2.42838 |
| O | +3.61611 | +1.65728 | +3.62622 |
| C | +2.54617 | +2.47073 | +4.04872 |
| O | +4.59988 | +0.49630 | +2.05778 |
| H | +1.59686 | +1.94129 | +4.02997 |
| H | +2.77428 | +2.75015 | +5.06988 |
| H | +2.47523 | +3.37220 | +3.44379 |
| H | +2.60832 | +0.87080 | +0.60393 |
| H | +1.85023 | +2.04084 | +1.66988 |
| H | +1.36890 | -0.13016 | +3.20410 |
| H | +1.91474 | -1.16123 | +1.73412 |
| H | -0.55258 | +0.87117 | +1.88246 |
| H | -0.53958 | -0.87235 | +1.88377 |
| H | -1.01251 | -0.07562 | -0.38731 |
| H | +0.43558 | +0.91143 | -0.40371 |
| H | +0.57052 | -0.84183 | -0.38735 |
| H | +2.25522 | -1.96594 | +1.41696 |

\* E = +11.590 kcal/mol ; Conformer 040

|   |          |          |          |
|---|----------|----------|----------|
| C | +0.00000 | +0.00000 | +0.00000 |
| C | +0.00000 | +0.00000 | +1.51610 |
| C | +1.38451 | +0.00000 | +2.09327 |
| C | +1.52899 | +0.12957 | +3.58910 |
| C | +0.81643 | +1.35647 | +4.10642 |
| O | -0.34709 | +1.22286 | +4.75575 |
| C | -0.91342 | -0.03568 | +5.03823 |
| O | +1.25024 | +2.45611 | +3.92872 |
| H | -0.29371 | -0.60615 | +5.72640 |
| H | -1.86437 | +0.17284 | +5.51302 |

|   |          |          |          |
|---|----------|----------|----------|
| H | -1.08939 | -0.61160 | +4.13350 |
| H | +1.19544 | -0.78409 | +4.07911 |
| H | +2.57813 | +0.26626 | +3.83850 |
| H | +2.02242 | -0.78168 | +1.68856 |
| H | +1.98506 | +1.09797 | +1.58043 |
| H | -0.55127 | +0.86715 | +1.88464 |
| H | -0.54060 | -0.88231 | +1.87490 |
| H | -1.01275 | -0.01119 | -0.39384 |
| H | +0.50075 | +0.88463 | -0.38576 |
| H | +0.51927 | -0.87322 | -0.39044 |
| H | +2.39097 | +1.84543 | +1.22882 |

\* E = +11.703 kcal/mol ; Conformer 041

|   |          |          |          |
|---|----------|----------|----------|
| C | +0.00000 | +0.00000 | +0.00000 |
| C | +0.00000 | +0.00000 | +1.51626 |
| C | +1.37409 | +0.00000 | +2.12682 |
| C | +2.29708 | +1.13941 | +1.73095 |
| C | +3.27163 | +0.78225 | +0.63197 |
| O | +4.34445 | +0.05328 | +0.95735 |
| C | +4.64607 | -0.25965 | +2.29771 |
| O | +3.11758 | +1.11023 | -0.50788 |
| H | +3.81575 | -0.74917 | +2.79954 |
| H | +5.48385 | -0.94460 | +2.25768 |
| H | +4.94294 | +0.62950 | +2.85018 |
| H | +1.71391 | +1.97054 | +1.34197 |
| H | +2.84382 | +1.49869 | +2.59946 |
| H | +1.36246 | -0.18383 | +3.19739 |
| H | +1.90208 | -1.13434 | +1.68750 |
| H | -0.54081 | +0.87687 | +1.88537 |
| H | -0.54444 | -0.86737 | +1.88842 |
| H | -1.01670 | -0.00975 | -0.38415 |
| H | +0.50575 | +0.87200 | -0.40651 |
| H | +0.51411 | -0.87761 | -0.38662 |
| H | +2.24184 | -1.94871 | +1.34785 |

\* E = +11.818 kcal/mol ; Conformer 042

|   |          |          |          |
|---|----------|----------|----------|
| C | +0.00000 | +0.00000 | +0.00000 |
| C | +0.00000 | +0.00000 | +1.51573 |
| C | +1.35541 | +0.00000 | +2.16542 |
| C | +2.33837 | +1.06354 | +1.76440 |
| C | +3.10212 | +0.80218 | +0.48825 |
| O | +3.87925 | +1.79635 | +0.03234 |
| C | +3.95904 | +3.04156 | +0.68474 |
| O | +3.07857 | -0.22827 | -0.11370 |
| H | +4.26536 | +2.93728 | +1.72292 |
| H | +4.71452 | +3.60458 | +0.15070 |
| H | +3.01608 | +3.58170 | +0.63375 |
| H | +1.82665 | +2.02630 | +1.67489 |

|   |          |          |          |
|---|----------|----------|----------|
| H | +3.08119 | +1.20194 | +2.55076 |
| H | +1.28679 | -0.09082 | +3.24531 |
| H | +1.89535 | -1.22134 | +1.88304 |
| H | -0.55399 | +0.87258 | +1.87875 |
| H | -0.54890 | -0.86832 | +1.87950 |
| H | -1.01877 | -0.02916 | -0.37885 |
| H | +0.47199 | +0.89334 | -0.40520 |
| H | +0.54359 | -0.85489 | -0.39111 |
| H | +2.18789 | -2.07210 | +1.74927 |

\* E = +11.921 kcal/mol ; Conformer 043

|   |          |          |          |
|---|----------|----------|----------|
| C | +0.00000 | +0.00000 | +0.00000 |
| C | +0.00000 | +0.00000 | +1.52084 |
| C | +1.36876 | +0.00000 | +2.15009 |
| C | +2.12786 | +1.30676 | +2.27198 |
| C | +1.85563 | +2.29082 | +1.16390 |
| O | +2.66803 | +2.33776 | +0.10571 |
| C | +3.80205 | +1.50364 | +0.00559 |
| O | +0.90897 | +3.02435 | +1.19856 |
| H | +3.54181 | +0.45557 | +0.12193 |
| H | +4.19563 | +1.66430 | -0.99039 |
| H | +4.56036 | +1.78289 | +0.73367 |
| H | +1.78479 | +1.81267 | +3.17297 |
| H | +3.18972 | +1.10748 | +2.39900 |
| H | +1.41292 | -0.53776 | +3.09275 |
| H | +2.11666 | -0.83603 | +1.41159 |
| H | -0.54923 | +0.87372 | +1.87932 |
| H | -0.53988 | -0.87662 | +1.87323 |
| H | -1.01921 | +0.00094 | -0.37737 |
| H | +0.49377 | +0.87406 | -0.41537 |
| H | +0.49905 | -0.88671 | -0.38509 |
| H | +2.64991 | -1.43551 | +0.93788 |

### S.2.5 (TS<sub>γ</sub>)<sup>‡</sup>

\* E = +0.000 kcal/mol ; Conformer 001

|   |          |          |          |
|---|----------|----------|----------|
| C | +0.00000 | +0.00000 | +0.00000 |
| C | +0.00000 | +0.00000 | +1.49651 |
| C | +1.34289 | +0.00000 | +2.16491 |
| C | +1.26090 | +0.08482 | +3.67441 |
| C | +0.71693 | -1.16383 | +4.29796 |
| O | +0.47557 | -0.99915 | +5.59571 |
| C | -0.01280 | -2.14328 | +6.27366 |
| O | +0.52923 | -2.20439 | +3.72632 |
| H | -0.15234 | -1.84028 | +7.30312 |
| H | -0.95355 | -2.46745 | +5.83995 |
| H | +0.70277 | -2.95692 | +6.20806 |
| H | +2.24495 | +0.25055 | +4.11240 |

|   |          |          |          |
|---|----------|----------|----------|
| H | +0.64592 | +0.92449 | +3.99440 |
| H | +1.87984 | -0.91005 | +1.88761 |
| H | +1.93165 | +0.83859 | +1.79274 |
| H | -0.53919 | +1.17068 | +1.84548 |
| H | -0.69787 | -0.70750 | +1.93547 |
| H | -1.00557 | +0.10633 | -0.39880 |
| H | +0.60804 | +0.81231 | -0.39456 |
| H | +0.41014 | -0.93477 | -0.38562 |
| H | -0.86351 | +2.02041 | +2.07097 |

\* E = +0.293 kcal/mol ; Conformer 002

|   |          |          |          |
|---|----------|----------|----------|
| C | +0.00000 | +0.00000 | +0.00000 |
| C | +0.00000 | +0.00000 | +1.49713 |
| C | +1.34067 | +0.00000 | +2.16764 |
| C | +1.23658 | +0.09676 | +3.67336 |
| C | +2.57299 | +0.08202 | +4.34541 |
| O | +2.45858 | +0.18568 | +5.66762 |
| C | +3.68006 | +0.17967 | +6.38500 |
| O | +3.63246 | -0.01216 | +3.78705 |
| H | +3.41081 | +0.27109 | +7.42920 |
| H | +4.21865 | -0.74621 | +6.20873 |
| H | +4.30434 | +1.01256 | +6.07699 |
| H | +0.71904 | +1.00706 | +3.97468 |
| H | +0.65046 | -0.72521 | +4.08475 |
| H | +1.88995 | -0.90601 | +1.90083 |
| H | +1.94360 | +0.82578 | +1.79076 |
| H | -0.54783 | +1.16238 | +1.84532 |
| H | -0.70671 | -0.70202 | +1.93526 |
| H | -1.00614 | +0.09764 | -0.39954 |
| H | +0.60078 | +0.81879 | -0.39106 |
| H | +0.42145 | -0.92839 | -0.38901 |
| H | -0.88808 | +2.00819 | +2.07169 |

\* E = +0.805 kcal/mol ; Conformer 003

|   |          |          |          |
|---|----------|----------|----------|
| C | +0.00000 | +0.00000 | +0.00000 |
| C | +0.00000 | +0.00000 | +1.49845 |
| C | +1.33540 | +0.00000 | +2.18730 |
| C | +2.12841 | -1.27781 | +1.97014 |
| C | +1.49682 | -2.47076 | +2.61965 |
| O | +2.04773 | -3.60750 | +2.20058 |
| C | +1.53919 | -4.78643 | +2.80003 |
| O | +0.61631 | -2.43476 | +3.43632 |
| H | +2.08875 | -5.60567 | +2.35517 |
| H | +1.69268 | -4.76160 | +3.87434 |
| H | +0.47696 | -4.88497 | +2.59974 |
| H | +2.27563 | -1.49674 | +0.91457 |
| H | +3.12857 | -1.18436 | +2.39487 |
| H | +1.93016 | +0.83822 | +1.82404 |



|   |          |          |          |
|---|----------|----------|----------|
| H | +1.19067 | +0.14334 | +3.25611 |
| H | -0.53305 | +1.17009 | +1.83534 |
| H | -0.70930 | -0.69063 | +1.94469 |
| H | -1.00061 | +0.16069 | -0.39384 |
| H | +0.64655 | +0.78275 | -0.39394 |
| H | +0.35346 | -0.95082 | -0.40283 |
| H | -0.86784 | +2.01808 | +2.04675 |

\* E = +0.924 kcal/mol ; Conformer 004

|   |          |          |          |
|---|----------|----------|----------|
| C | +0.00000 | +0.00000 | +0.00000 |
| C | +0.00000 | +0.00000 | +1.49831 |
| C | +1.32160 | +0.00000 | +2.21547 |
| C | +2.28389 | +1.06997 | +1.73430 |
| C | +3.03779 | +0.67350 | +0.50152 |
| O | +3.52534 | +1.73179 | -0.14050 |
| C | +4.30443 | +1.44110 | -1.28776 |
| O | +3.22341 | -0.45516 | +0.13241 |
| H | +4.62197 | +2.39833 | -1.68016 |
| H | +5.16303 | +0.83382 | -1.01883 |
| H | +3.71137 | +0.90463 | -2.02170 |
| H | +1.78224 | +2.01889 | +1.55500 |
| H | +3.04121 | +1.26725 | +2.49353 |
| H | +1.14178 | +0.13552 | +3.28047 |
| H | +1.80177 | -0.97365 | +2.09738 |
| H | -0.55738 | +1.15508 | +1.84575 |
| H | -0.70389 | -0.70674 | +1.92954 |
| H | -1.01493 | +0.01113 | -0.38873 |
| H | +0.51350 | +0.87231 | -0.40275 |
| H | +0.50705 | -0.88288 | -0.39028 |
| H | -0.90700 | +1.99456 | +2.09121 |

\* E = +0.951 kcal/mol ; Conformer 005

|   |          |          |          |
|---|----------|----------|----------|
| C | +0.00000 | +0.00000 | +0.00000 |
| C | +0.00000 | +0.00000 | +1.49881 |
| C | +1.32475 | +0.00000 | +2.20636 |
| C | +2.23144 | +1.13843 | +1.78942 |
| C | +3.49501 | +1.18248 | +2.58952 |
| O | +4.28350 | +2.18382 | +2.20478 |
| C | +5.50325 | +2.30328 | +2.91509 |
| O | +3.78833 | +0.42337 | +3.47310 |
| H | +6.01484 | +3.15407 | +2.48424 |
| H | +5.31229 | +2.46683 | +3.97108 |
| H | +6.09772 | +1.40210 | +2.80172 |
| H | +2.51342 | +1.07420 | +0.73957 |
| H | +1.73029 | +2.09997 | +1.90369 |
| H | +1.16768 | +0.04858 | +3.28200 |
| H | +1.83661 | -0.94927 | +2.02890 |
| H | -0.56974 | +1.15521 | +1.84898 |

|   |          |          |          |
|---|----------|----------|----------|
| H | -0.69993 | -0.71121 | +1.92828 |
| H | -1.01314 | -0.00505 | -0.39309 |
| H | +0.50641 | +0.87326 | -0.40609 |
| H | +0.50931 | -0.88399 | -0.38930 |
| H | -0.93124 | +1.98751 | +2.08389 |

\* E = +1.021 kcal/mol ; Conformer 006

|   |          |          |          |
|---|----------|----------|----------|
| C | +0.00000 | +0.00000 | +0.00000 |
| C | +0.00000 | +0.00000 | +1.49849 |
| C | +1.33284 | +0.00000 | +2.18971 |
| C | +2.07721 | -1.30991 | +2.00878 |
| C | +3.39287 | -1.32629 | +2.72329 |
| O | +4.02744 | -2.48451 | +2.55300 |
| C | +5.28479 | -2.58789 | +3.19791 |
| O | +3.84357 | -0.42395 | +3.37481 |
| H | +5.65866 | -3.57558 | +2.96154 |
| H | +5.96298 | -1.82426 | +2.83020 |
| H | +5.17109 | -2.46877 | +4.27084 |
| H | +1.49127 | -2.15307 | +2.37494 |
| H | +2.27297 | -1.52062 | +0.95805 |
| H | +1.94863 | +0.81472 | +1.81052 |
| H | +1.20446 | +0.18844 | +3.25385 |
| H | -0.55132 | +1.16198 | +1.84025 |
| H | -0.71307 | -0.69724 | +1.93353 |
| H | -0.99976 | +0.16128 | -0.39584 |
| H | +0.64741 | +0.78355 | -0.38992 |
| H | +0.35583 | -0.95036 | -0.40149 |
| H | -0.91409 | +1.99407 | +2.06294 |

\* E = +1.196 kcal/mol ; Conformer 007

|   |          |          |          |
|---|----------|----------|----------|
| C | +0.00000 | +0.00000 | +0.00000 |
| C | +0.00000 | +0.00000 | +1.49769 |
| C | +1.34742 | +0.00000 | +2.15885 |
| C | +1.28529 | -0.06551 | +3.67742 |
| C | +0.61449 | +1.12572 | +4.29065 |
| O | +1.19474 | +2.26285 | +3.91372 |
| C | +0.59215 | +3.44364 | +4.41224 |
| O | -0.32512 | +1.08727 | +5.03756 |
| H | +1.17455 | +4.26479 | +4.01491 |
| H | -0.43798 | +3.50747 | +4.07493 |
| H | +0.61073 | +3.44967 | +5.49754 |
| H | +0.74229 | -0.94453 | +4.01109 |
| H | +2.29500 | -0.11935 | +4.08182 |
| H | +1.91695 | -0.86214 | +1.80110 |
| H | +1.90656 | +0.88449 | +1.85457 |
| H | -0.57589 | +1.16089 | +1.81911 |
| H | -0.70059 | -0.70556 | +1.93877 |
| H | -1.00591 | +0.10335 | -0.39840 |

|   |          |          |          |
|---|----------|----------|----------|
| H | +0.60373 | +0.81656 | -0.39172 |
| H | +0.41558 | -0.93089 | -0.38939 |
| H | -0.97060 | +1.99576 | +1.97502 |

\* E = +1.228 kcal/mol ; Conformer 008

|   |          |          |          |
|---|----------|----------|----------|
| C | +0.00000 | +0.00000 | +0.00000 |
| C | +0.00000 | +0.00000 | +1.49699 |
| C | +1.34324 | +0.00000 | +2.16680 |
| C | +1.27075 | +0.22908 | +3.66592 |
| C | +1.07008 | +1.67689 | +4.00192 |
| O | +0.29069 | +1.84422 | +5.06533 |
| C | +0.07775 | +3.19111 | +5.45102 |
| O | +1.57386 | +2.59175 | +3.40828 |
| H | -0.57078 | +3.15228 | +6.31650 |
| H | +1.02073 | +3.66799 | +5.69938 |
| H | -0.39340 | +3.74157 | +4.64278 |
| H | +0.48650 | -0.36249 | +4.13107 |
| H | +2.21009 | -0.06134 | +4.13642 |
| H | +1.82902 | -0.96031 | +1.97574 |
| H | +1.97976 | +0.76650 | +1.72688 |
| H | -0.60530 | +1.14735 | +1.83783 |
| H | -0.69418 | -0.71465 | +1.93507 |
| H | -1.00849 | +0.07345 | -0.39891 |
| H | +0.58035 | +0.83384 | -0.38964 |
| H | +0.44261 | -0.91836 | -0.39041 |
| H | -1.05185 | +1.94071 | +2.04107 |

\* E = +1.271 kcal/mol ; Conformer 009

|   |          |          |          |
|---|----------|----------|----------|
| C | +0.00000 | +0.00000 | +0.00000 |
| C | +0.00000 | +0.00000 | +1.49684 |
| C | +1.34206 | +0.00000 | +2.16650 |
| C | +1.25435 | +0.04837 | +3.68083 |
| C | +0.59461 | -1.14004 | +4.31380 |
| O | +0.84360 | -2.27155 | +3.65479 |
| C | +0.28627 | -3.44091 | +4.22817 |
| O | -0.06139 | -1.10725 | +5.31911 |
| H | +0.57407 | -4.25674 | +3.57783 |
| H | +0.67600 | -3.59386 | +5.22965 |
| H | -0.79462 | -3.35749 | +4.28277 |
| H | +2.25425 | +0.10827 | +4.11140 |
| H | +0.71160 | +0.92594 | +4.02063 |
| H | +1.89844 | -0.88937 | +1.86366 |
| H | +1.91728 | +0.85895 | +1.81963 |
| H | -0.54288 | +1.16789 | +1.84444 |
| H | -0.70379 | -0.70514 | +1.93393 |
| H | -1.00558 | +0.10434 | -0.39915 |
| H | +0.60503 | +0.81557 | -0.39209 |
| H | +0.41495 | -0.93157 | -0.38833 |

H -0.86933 +2.01869 +2.05912

\* E = +1.317 kcal/mol ; Conformer 010

C +0.00000 +0.00000 +0.00000

C +0.00000 +0.00000 +1.49886

C +1.32758 +0.00000 +2.20665

C +2.33992 +0.99771 +1.65539

C +1.82772 +2.40399 +1.69927

O +1.63487 +2.81714 +2.94880

C +1.08495 +4.11625 +3.07946

O +1.59597 +3.08940 +0.73965

H +0.98897 +4.29203 +4.14301

H +1.74155 +4.85240 +2.62643

H +0.11419 +4.16039 +2.59520

H +3.25192 +0.94569 +2.24648

H +2.59082 +0.77771 +0.62291

H +1.17384 +0.19437 +3.26693

H +1.76781 -0.99810 +2.13572

H -0.60921 +1.13533 +1.85091

H -0.69172 -0.71607 +1.93474

H -1.01429 -0.02651 -0.38886

H +0.48688 +0.88660 -0.40031

H +0.52514 -0.87504 -0.38960

H -1.04954 +1.92651 +2.09322

\* E = +1.335 kcal/mol ; Conformer 011

C +0.00000 +0.00000 +0.00000

C +0.00000 +0.00000 +1.49821

C +1.32546 +0.00000 +2.20640

C +2.11574 -1.28618 +2.00875

C +2.83837 -1.33792 +0.69695

O +3.04303 -2.58925 +0.29269

C +3.78343 -2.72555 -0.90799

O +3.22888 -0.38217 +0.08250

H +3.86165 -3.78970 -1.08839

H +3.26808 -2.23515 -1.72779

H +4.76821 -2.28244 -0.79788

H +2.88944 -1.36947 +2.77344

H +1.49226 -2.17178 +2.10775

H +1.93339 +0.83304 +1.85602

H +1.15879 +0.14562 +3.27202

H -0.55020 +1.15790 +1.84685

H -0.71330 -0.69917 +1.93065

H -0.99686 +0.19276 -0.38994

H +0.68134 +0.75028 -0.39347

H +0.31799 -0.96583 -0.39802

H -0.91391 +1.98810 +2.08550

\* E = +1.335 kcal/mol ; Conformer 012

|   |          |          |          |
|---|----------|----------|----------|
| C | +0.00000 | +0.00000 | +0.00000 |
| C | +0.00000 | +0.00000 | +1.49705 |
| C | +1.34098 | +0.00000 | +2.16790 |
| C | +1.22892 | +0.08837 | +3.68063 |
| C | +2.54467 | +0.07046 | +4.39345 |
| O | +3.42872 | +0.89515 | +3.83389 |
| C | +4.69121 | +0.95566 | +4.47342 |
| O | +2.79604 | -0.58606 | +5.36749 |
| H | +5.28081 | +1.65910 | +3.90001 |
| H | +4.58016 | +1.29556 | +5.49835 |
| H | +5.16052 | -0.02306 | +4.47805 |
| H | +0.72452 | +1.01685 | +3.95115 |
| H | +0.64063 | -0.73034 | +4.08411 |
| H | +1.88103 | -0.91118 | +1.89357 |
| H | +1.93992 | +0.83054 | +1.79726 |
| H | -0.54374 | +1.16526 | +1.84622 |
| H | -0.70615 | -0.70123 | +1.93650 |
| H | -1.00620 | +0.10034 | -0.39867 |
| H | +0.60223 | +0.81750 | -0.39167 |
| H | +0.41765 | -0.92986 | -0.38979 |
| H | -0.88039 | +2.01175 | +2.07017 |

\* E = +1.456 kcal/mol ; Conformer 013

|   |          |          |          |
|---|----------|----------|----------|
| C | +0.00000 | +0.00000 | +0.00000 |
| C | +0.00000 | +0.00000 | +1.49716 |
| C | +1.34117 | +0.00000 | +2.16747 |
| C | +1.23145 | +0.09567 | +3.67984 |
| C | +2.54742 | +0.08280 | +4.39318 |
| O | +3.36323 | -0.86086 | +3.92366 |
| C | +4.61930 | -0.95324 | +4.57206 |
| O | +2.85172 | +0.81012 | +5.29905 |
| H | +5.15242 | -1.75260 | +4.07393 |
| H | +5.16138 | -0.01721 | +4.48195 |
| H | +4.48577 | -1.18035 | +5.62513 |
| H | +0.71350 | +1.00067 | +3.98187 |
| H | +0.65509 | -0.75041 | +4.05744 |
| H | +1.88688 | -0.90742 | +1.90136 |
| H | +1.93413 | +0.83345 | +1.78752 |
| H | -0.55179 | +1.16256 | +1.84383 |
| H | -0.70278 | -0.70482 | +1.93680 |
| H | -1.00667 | +0.09547 | -0.39865 |
| H | +0.59733 | +0.82122 | -0.39156 |
| H | +0.42316 | -0.92718 | -0.39010 |
| H | -0.89658 | +2.00645 | +2.06204 |

\* E = +1.461 kcal/mol ; Conformer 014

|   |          |          |          |
|---|----------|----------|----------|
| C | +0.00000 | +0.00000 | +0.00000 |
|---|----------|----------|----------|

|   |          |          |          |
|---|----------|----------|----------|
| C | +0.00000 | +0.00000 | +1.49783 |
| C | +1.33670 | +0.00000 | +2.18444 |
| C | +2.18775 | -1.21975 | +1.82821 |
| C | +1.46575 | -2.50208 | +2.09972 |
| O | +1.18279 | -2.64478 | +3.39334 |
| C | +0.47803 | -3.82508 | +3.73558 |
| O | +1.14871 | -3.31203 | +1.27046 |
| H | +0.32945 | -3.78211 | +4.80665 |
| H | -0.47559 | -3.86032 | +3.21810 |
| H | +1.05614 | -4.70288 | +3.46449 |
| H | +2.45282 | -1.21927 | +0.77602 |
| H | +3.10521 | -1.20639 | +2.41382 |
| H | +1.89352 | +0.89341 | +1.90168 |
| H | +1.19764 | +0.03422 | +3.26281 |
| H | -0.55085 | +1.15859 | +1.85538 |
| H | -0.70713 | -0.70477 | +1.93028 |
| H | -0.99554 | +0.18839 | -0.39413 |
| H | +0.66927 | +0.76346 | -0.39364 |
| H | +0.32608 | -0.96574 | -0.38914 |
| H | -0.90347 | +1.99290 | +2.08324 |

\* E = +1.571 kcal/mol ; Conformer 015

|   |          |          |          |
|---|----------|----------|----------|
| C | +0.00000 | +0.00000 | +0.00000 |
| C | +0.00000 | +0.00000 | +1.49877 |
| C | +1.32772 | +0.00000 | +2.20547 |
| C | +2.31528 | +1.05596 | +1.71948 |
| C | +1.79933 | +2.43410 | +1.99634 |
| O | +1.39960 | +3.05702 | +0.89021 |
| C | +0.83027 | +4.33903 | +1.09317 |
| O | +1.72118 | +2.92595 | +3.08941 |
| H | +0.56039 | +4.70275 | +0.11026 |
| H | -0.04732 | +4.25998 | +1.72753 |
| H | +1.54965 | +5.00158 | +1.56397 |
| H | +3.24917 | +0.94657 | +2.26418 |
| H | +2.51959 | +0.94459 | +0.65896 |
| H | +1.17295 | +0.13109 | +3.27525 |
| H | +1.79401 | -0.98054 | +2.07731 |
| H | -0.62240 | +1.13236 | +1.84763 |
| H | -0.68764 | -0.72189 | +1.93122 |
| H | -1.01396 | -0.03246 | -0.38960 |
| H | +0.48175 | +0.88929 | -0.40001 |
| H | +0.53079 | -0.87130 | -0.39001 |
| H | -1.07358 | +1.91906 | +2.07641 |

\* E = +1.728 kcal/mol ; Conformer 016

|   |          |          |          |
|---|----------|----------|----------|
| C | +0.00000 | +0.00000 | +0.00000 |
| C | +0.00000 | +0.00000 | +1.49956 |
| C | +1.32325 | +0.00000 | +2.21221 |

|   |          |          |          |
|---|----------|----------|----------|
| C | +2.05438 | -1.33922 | +2.15992 |
| C | +2.52089 | -1.73717 | +0.79399 |
| O | +3.18158 | -0.75188 | +0.18834 |
| C | +3.64705 | -1.04622 | -1.11620 |
| O | +2.34716 | -2.81175 | +0.28510 |
| H | +4.17076 | -0.16066 | -1.45204 |
| H | +4.31350 | -1.90261 | -1.09802 |
| H | +2.81043 | -1.26673 | -1.77290 |
| H | +2.94001 | -1.28618 | +2.79356 |
| H | +1.43180 | -2.14723 | +2.53199 |
| H | +1.96715 | +0.77244 | +1.79451 |
| H | +1.16321 | +0.25029 | +3.26007 |
| H | -0.54010 | +1.15831 | +1.83940 |
| H | -0.71755 | -0.69418 | +1.93208 |
| H | -0.99075 | +0.22549 | -0.38806 |
| H | +0.69614 | +0.73981 | -0.39016 |
| H | +0.28541 | -0.97279 | -0.40314 |
| H | -0.89805 | +1.99699 | +2.07457 |

\* E = +1.796 kcal/mol ; Conformer 017

|   |          |          |          |
|---|----------|----------|----------|
| C | +0.00000 | +0.00000 | +0.00000 |
| C | +0.00000 | +0.00000 | +1.49815 |
| C | +1.33425 | +0.00000 | +2.18634 |
| C | +2.08686 | -1.31372 | +1.98634 |
| C | +3.40390 | -1.34192 | +2.69640 |
| O | +4.18642 | -0.32898 | +2.32682 |
| C | +5.45589 | -0.28207 | +2.95381 |
| O | +3.74223 | -2.16379 | +3.50438 |
| H | +5.95460 | +0.58906 | +2.54932 |
| H | +5.34343 | -0.19342 | +4.02976 |
| H | +6.02022 | -1.18280 | +2.73349 |
| H | +1.50861 | -2.15690 | +2.35141 |
| H | +2.27986 | -1.46889 | +0.92537 |
| H | +1.94566 | +0.81862 | +1.80967 |
| H | +1.19378 | +0.17161 | +3.25315 |
| H | -0.54591 | +1.16171 | +1.84311 |
| H | -0.71096 | -0.69789 | +1.93470 |
| H | -0.99939 | +0.16588 | -0.39465 |
| H | +0.65144 | +0.77960 | -0.39095 |
| H | +0.34987 | -0.95273 | -0.40065 |
| H | -0.90331 | +1.99694 | +2.06985 |

\* E = +1.807 kcal/mol ; Conformer 018

|   |          |          |          |
|---|----------|----------|----------|
| C | +0.00000 | +0.00000 | +0.00000 |
| C | +0.00000 | +0.00000 | +1.49815 |
| C | +1.33237 | +0.00000 | +2.18983 |
| C | +2.08103 | -1.31799 | +2.00202 |
| C | +3.40346 | -1.33562 | +2.70324 |

|   |          |          |          |
|---|----------|----------|----------|
| O | +3.27200 | -1.11873 | +4.01100 |
| C | +4.48003 | -1.11624 | +4.75094 |
| O | +4.46811 | -1.51855 | +2.17807 |
| H | +4.19820 | -0.92695 | +5.77852 |
| H | +4.98024 | -2.07549 | +4.66179 |
| H | +5.14488 | -0.33916 | +4.38719 |
| H | +1.47922 | -2.13530 | +2.39921 |
| H | +2.27641 | -1.51833 | +0.95381 |
| H | +1.94185 | +0.81680 | +1.80121 |
| H | +1.19961 | +0.17923 | +3.25471 |
| H | -0.54835 | +1.16060 | +1.84291 |
| H | -0.70950 | -0.69956 | +1.93505 |
| H | -1.00040 | +0.15876 | -0.39493 |
| H | +0.64578 | +0.78441 | -0.39063 |
| H | +0.35842 | -0.94943 | -0.40053 |
| H | -0.90776 | +1.99489 | +2.07030 |

\* E = +1.991 kcal/mol ; Conformer 019

|   |          |          |          |
|---|----------|----------|----------|
| C | +0.00000 | +0.00000 | +0.00000 |
| C | +0.00000 | +0.00000 | +1.49850 |
| C | +1.32477 | +0.00000 | +2.20742 |
| C | +2.23661 | +1.14111 | +1.78063 |
| C | +3.52643 | +1.18779 | +2.53865 |
| O | +3.33395 | +1.15064 | +3.85634 |
| C | +4.50959 | +1.21635 | +4.64361 |
| O | +4.61889 | +1.26358 | +2.04473 |
| H | +4.17972 | +1.17454 | +5.67351 |
| H | +5.16423 | +0.38070 | +4.41697 |
| H | +5.04318 | +2.14165 | +4.45012 |
| H | +2.49777 | +1.08040 | +0.72960 |
| H | +1.72324 | +2.08977 | +1.94330 |
| H | +1.16285 | +0.05774 | +3.28146 |
| H | +1.82998 | -0.95286 | +2.02190 |
| H | -0.56781 | +1.15602 | +1.85210 |
| H | -0.69916 | -0.71154 | +1.92900 |
| H | -1.01352 | -0.00974 | -0.39180 |
| H | +0.50239 | +0.87504 | -0.40645 |
| H | +0.51336 | -0.88142 | -0.38963 |
| H | -0.92891 | +1.98632 | +2.09072 |

\* E = +2.041 kcal/mol ; Conformer 020

|   |          |          |          |
|---|----------|----------|----------|
| C | +0.00000 | +0.00000 | +0.00000 |
| C | +0.00000 | +0.00000 | +1.49863 |
| C | +1.32015 | +0.00000 | +2.21821 |
| C | +2.27918 | +1.09274 | +1.77179 |
| C | +2.95783 | +0.87725 | +0.45284 |
| O | +3.26827 | -0.40104 | +0.24163 |
| C | +3.95258 | -0.66452 | -0.97028 |



|   |          |          |          |
|---|----------|----------|----------|
| O | +3.23843 | +1.74831 | -0.32565 |
| H | +4.13251 | -1.73170 | -0.98384 |
| H | +3.34453 | -0.36779 | -1.81934 |
| H | +4.88951 | -0.11756 | -1.00306 |
| H | +1.78654 | +2.06008 | +1.72085 |
| H | +3.08314 | +1.18716 | +2.50250 |
| H | +1.13372 | +0.12177 | +3.28425 |
| H | +1.80490 | -0.97078 | +2.09876 |
| H | -0.56329 | +1.15358 | +1.85018 |
| H | -0.70253 | -0.70846 | +1.92948 |
| H | -1.01491 | -0.00371 | -0.38872 |
| H | +0.50176 | +0.87628 | -0.40661 |
| H | +0.51016 | -0.88284 | -0.38941 |
| H | -0.92138 | +1.98441 | +2.10302 |

\* E = +7.834 kcal/mol ; Conformer 021

|   |          |          |          |
|---|----------|----------|----------|
| C | +0.00000 | +0.00000 | +0.00000 |
| C | +0.00000 | +0.00000 | +1.49621 |
| C | +1.34291 | +0.00000 | +2.16445 |
| C | +1.25515 | +0.10540 | +3.67314 |
| C | +0.71563 | -1.15175 | +4.30159 |
| O | +0.45694 | -1.13161 | +5.61404 |
| C | +0.63186 | +0.03939 | +6.37823 |
| O | +0.53006 | -2.16503 | +3.69197 |
| H | +0.43213 | -0.24649 | +7.40335 |
| H | +1.64810 | +0.41965 | +6.30831 |
| H | -0.07092 | +0.81539 | +6.08382 |
| H | +2.24009 | +0.29184 | +4.10366 |
| H | +0.63667 | +0.95627 | +3.95812 |
| H | +1.87463 | -0.91672 | +1.90227 |
| H | +1.93560 | +0.83264 | +1.78502 |
| H | -0.53466 | +1.17175 | +1.84795 |
| H | -0.69712 | -0.70684 | +1.93661 |
| H | -1.00557 | +0.10793 | -0.39815 |
| H | +0.61006 | +0.81015 | -0.39587 |
| H | +0.40710 | -0.93656 | -0.38428 |
| H | -0.85030 | +2.02259 | +2.08576 |

\* E = +8.178 kcal/mol ; Conformer 022

|   |          |          |          |
|---|----------|----------|----------|
| C | +0.00000 | +0.00000 | +0.00000 |
| C | +0.00000 | +0.00000 | +1.49707 |
| C | +1.34090 | +0.00000 | +2.16703 |
| C | +1.23737 | +0.12657 | +3.67112 |
| C | +2.58735 | +0.09465 | +4.33187 |
| O | +2.63560 | +0.25152 | +5.66074 |
| C | +1.46611 | +0.47261 | +6.41443 |
| O | +3.60861 | -0.06995 | +3.73096 |
| H | +1.78761 | +0.52668 | +7.44698 |

|   |          |          |          |
|---|----------|----------|----------|
| H | +0.98683 | +1.41048 | +6.14335 |
| H | +0.75667 | -0.34462 | +6.30729 |
| H | +0.72428 | +1.05030 | +3.94017 |
| H | +0.62928 | -0.68086 | +4.08324 |
| H | +1.88459 | -0.91440 | +1.92088 |
| H | +1.95284 | +0.81311 | +1.77844 |
| H | -0.54968 | +1.16094 | +1.84795 |
| H | -0.70643 | -0.70313 | +1.93442 |
| H | -1.00630 | +0.09521 | -0.39958 |
| H | +0.59935 | +0.81964 | -0.39113 |
| H | +0.42351 | -0.92768 | -0.38824 |
| H | -0.89188 | +2.00376 | +2.08469 |

\* E = +8.867 kcal/mol ; Conformer 023

|   |          |          |          |
|---|----------|----------|----------|
| C | +0.00000 | +0.00000 | +0.00000 |
| C | +0.00000 | +0.00000 | +1.49890 |
| C | +1.32404 | +0.00000 | +2.20756 |
| C | +2.21639 | +1.16024 | +1.81842 |
| C | +3.49746 | +1.16257 | +2.60541 |
| O | +4.35364 | +2.17148 | +2.39979 |
| C | +4.05423 | +3.21440 | +1.50147 |
| O | +3.78742 | +0.30925 | +3.39209 |
| H | +4.91973 | +3.86504 | +1.50741 |
| H | +3.89766 | +2.84373 | +0.49110 |
| H | +3.18319 | +3.78127 | +1.82199 |
| H | +2.46846 | +1.12637 | +0.75799 |
| H | +1.69547 | +2.10641 | +1.97100 |
| H | +1.16872 | +0.02296 | +3.28391 |
| H | +1.85203 | -0.93565 | +2.01034 |
| H | -0.57037 | +1.15532 | +1.84827 |
| H | -0.69940 | -0.71206 | +1.92742 |
| H | -1.01295 | -0.00921 | -0.39331 |
| H | +0.50201 | +0.87541 | -0.40757 |
| H | +0.51300 | -0.88190 | -0.38880 |
| H | -0.92672 | +1.99139 | +2.07891 |

\* E = +8.934 kcal/mol ; Conformer 024

|   |          |          |          |
|---|----------|----------|----------|
| C | +0.00000 | +0.00000 | +0.00000 |
| C | +0.00000 | +0.00000 | +1.49843 |
| C | +1.33559 | +0.00000 | +2.18707 |
| C | +2.14320 | -1.26654 | +1.95341 |
| C | +1.53004 | -2.46813 | +2.62105 |
| O | +2.08967 | -3.66268 | +2.39157 |
| C | +3.20076 | -3.80127 | +1.53667 |
| O | +0.58688 | -2.40459 | +3.35442 |
| H | +3.49035 | -4.84288 | +1.59741 |
| H | +2.94356 | -3.56588 | +0.50629 |
| H | +4.03598 | -3.18249 | +1.85577 |

|   |          |          |          |
|---|----------|----------|----------|
| H | +2.26543 | -1.46142 | +0.88835 |
| H | +3.15332 | -1.14608 | +2.34876 |
| H | +1.92362 | +0.84696 | +1.83242 |
| H | +1.19079 | +0.12789 | +3.25739 |
| H | -0.52353 | +1.17442 | +1.83364 |
| H | -0.71049 | -0.68715 | +1.94605 |
| H | -0.99829 | +0.17672 | -0.39269 |
| H | +0.65877 | +0.77164 | -0.39603 |
| H | +0.33402 | -0.95769 | -0.40388 |
| H | -0.84706 | +2.02728 | +2.04352 |

\* E = +8.961 kcal/mol ; Conformer 025

|   |          |          |          |
|---|----------|----------|----------|
| C | +0.00000 | +0.00000 | +0.00000 |
| C | +0.00000 | +0.00000 | +1.49776 |
| C | +1.31838 | +0.00000 | +2.22121 |
| C | +2.26673 | +1.09532 | +1.76792 |
| C | +3.07675 | +0.70596 | +0.55933 |
| O | +3.78936 | +1.66251 | -0.04742 |
| C | +3.75853 | +2.99885 | +0.39956 |
| O | +3.13871 | -0.41251 | +0.13805 |
| H | +4.49548 | +3.52392 | -0.19520 |
| H | +2.78340 | +3.45156 | +0.23500 |
| H | +4.02749 | +3.08015 | +1.44985 |
| H | +1.72027 | +2.01852 | +1.57659 |
| H | +2.97943 | +1.33092 | +2.55993 |
| H | +1.12978 | +0.11541 | +3.28710 |
| H | +1.81121 | -0.96399 | +2.08565 |
| H | -0.55175 | +1.15593 | +1.84480 |
| H | -0.70526 | -0.70546 | +1.92870 |
| H | -1.01546 | +0.02257 | -0.38688 |
| H | +0.52563 | +0.86281 | -0.40647 |
| H | +0.49964 | -0.88653 | -0.38971 |
| H | -0.88716 | +2.00457 | +2.08821 |

\* E = +9.084 kcal/mol ; Conformer 026

|   |          |          |          |
|---|----------|----------|----------|
| C | +0.00000 | +0.00000 | +0.00000 |
| C | +0.00000 | +0.00000 | +1.49866 |
| C | +1.33222 | +0.00000 | +2.19087 |
| C | +2.07684 | -1.31090 | +2.01376 |
| C | +3.39808 | -1.30438 | +2.73380 |
| O | +4.15391 | -2.40805 | +2.65976 |
| C | +3.73260 | -3.53759 | +1.93174 |
| O | +3.79931 | -0.36944 | +3.36190 |
| H | +4.52313 | -4.26945 | +2.04077 |
| H | +2.80981 | -3.95234 | +2.33092 |
| H | +3.60467 | -3.31059 | +0.87577 |
| H | +1.47771 | -2.14500 | +2.38254 |
| H | +2.25594 | -1.51768 | +0.95812 |

|   |          |          |          |
|---|----------|----------|----------|
| H | +1.95188 | +0.81134 | +1.81205 |
| H | +1.20689 | +0.18953 | +3.25471 |
| H | -0.54744 | +1.16325 | +1.83939 |
| H | -0.71580 | -0.69419 | +1.93427 |
| H | -0.99889 | +0.16599 | -0.39598 |
| H | +0.65094 | +0.78066 | -0.38969 |
| H | +0.35068 | -0.95188 | -0.40309 |
| H | -0.90747 | +1.99685 | +2.06144 |

\* E = +9.723 kcal/mol ; Conformer 027

|   |          |          |          |
|---|----------|----------|----------|
| C | +0.00000 | +0.00000 | +0.00000 |
| C | +0.00000 | +0.00000 | +1.49774 |
| C | +1.32041 | +0.00000 | +2.21664 |
| C | +2.08905 | -1.30635 | +2.07394 |
| C | +2.89757 | -1.38064 | +0.80507 |
| O | +3.43382 | -2.56311 | +0.47718 |
| C | +3.23282 | -3.71003 | +1.27048 |
| O | +3.11123 | -0.43763 | +0.10101 |
| H | +3.86530 | -4.47761 | +0.84222 |
| H | +3.52766 | -3.54409 | +2.30379 |
| H | +2.19827 | -4.04404 | +1.23350 |
| H | +2.79508 | -1.42013 | +2.89913 |
| H | +1.41582 | -2.16022 | +2.14165 |
| H | +1.94381 | +0.81156 | +1.84676 |
| H | +1.14261 | +0.18006 | +3.27551 |
| H | -0.54681 | +1.15716 | +1.84668 |
| H | -0.71630 | -0.69596 | +1.93177 |
| H | -1.00101 | +0.17604 | -0.38730 |
| H | +0.66980 | +0.76004 | -0.39287 |
| H | +0.33978 | -0.95621 | -0.40133 |
| H | -0.90595 | +1.98860 | +2.09318 |

\* E = +9.760 kcal/mol ; Conformer 028

|   |          |          |          |
|---|----------|----------|----------|
| C | +0.00000 | +0.00000 | +0.00000 |
| C | +0.00000 | +0.00000 | +1.49671 |
| C | +1.33916 | +0.00000 | +2.17030 |
| C | +1.22058 | +0.01763 | +3.69175 |
| C | +2.57854 | +0.15089 | +4.32151 |
| O | +3.07277 | +1.37975 | +4.51875 |
| C | +2.29156 | +2.53402 | +4.30322 |
| O | +3.25551 | -0.79620 | +4.59899 |
| H | +1.87196 | +2.56414 | +3.30051 |
| H | +1.49118 | +2.60950 | +5.03576 |
| H | +2.96576 | +3.37198 | +4.43014 |
| H | +0.54663 | +0.81284 | +4.00094 |
| H | +0.80889 | -0.92557 | +4.03679 |
| H | +1.91197 | -0.88114 | +1.87317 |
| H | +1.91324 | +0.86077 | +1.82109 |

|   |          |          |          |
|---|----------|----------|----------|
| H | -0.51557 | +1.17210 | +1.85177 |
| H | -0.70926 | -0.69514 | +1.94025 |
| H | -1.00519 | +0.10918 | -0.39836 |
| H | +0.60997 | +0.81113 | -0.39299 |
| H | +0.40914 | -0.93413 | -0.38766 |
| H | -0.78823 | +2.03842 | +2.09855 |

\* E = +9.972 kcal/mol ; Conformer 029

|   |          |          |          |
|---|----------|----------|----------|
| C | +0.00000 | +0.00000 | +0.00000 |
| C | +0.00000 | +0.00000 | +1.49643 |
| C | +1.34252 | +0.00000 | +2.16945 |
| C | +1.27412 | +0.37551 | +3.63824 |
| C | +1.30503 | +1.86981 | +3.84333 |
| O | +1.00080 | +2.33888 | +5.05936 |
| C | +0.59518 | +1.48055 | +6.09976 |
| O | +1.62956 | +2.64295 | +2.99114 |
| H | +0.52408 | +2.10312 | +6.98300 |
| H | -0.37996 | +1.04346 | +5.89685 |
| H | +1.32126 | +0.69147 | +6.28087 |
| H | +0.38797 | -0.05316 | +4.10405 |
| H | +2.12719 | -0.03140 | +4.18400 |
| H | +1.78057 | -0.99668 | +2.07524 |
| H | +2.01159 | +0.69229 | +1.66327 |
| H | -0.61731 | +1.13885 | +1.84829 |
| H | -0.69092 | -0.71965 | +1.93284 |
| H | -1.00951 | +0.06088 | -0.39847 |
| H | +0.56937 | +0.84225 | -0.38716 |
| H | +0.45437 | -0.91213 | -0.39197 |
| H | -1.08936 | +1.90830 | +2.07589 |

\* E = +10.126 kcal/mol ; Conformer 030

|   |          |          |          |
|---|----------|----------|----------|
| C | +0.00000 | +0.00000 | +0.00000 |
| C | +0.00000 | +0.00000 | +1.49670 |
| C | +1.33852 | +0.00000 | +2.17933 |
| C | +2.20043 | -1.22455 | +1.84123 |
| C | +1.47834 | -2.50384 | +2.16021 |
| O | +1.58064 | -3.01953 | +3.39084 |
| C | +2.46724 | -2.48233 | +4.34576 |
| O | +0.76716 | -3.04859 | +1.36503 |
| H | +2.27849 | -3.02868 | +5.26153 |
| H | +3.50317 | -2.63404 | +4.05116 |
| H | +2.28507 | -1.42523 | +4.52080 |
| H | +2.39336 | -1.24703 | +0.77324 |
| H | +3.15701 | -1.15352 | +2.35193 |
| H | +1.89887 | +0.88544 | +1.87858 |
| H | +1.19749 | +0.07248 | +3.25742 |
| H | -0.53478 | +1.16572 | +1.85987 |
| H | -0.70999 | -0.70151 | +1.92579 |

|   |          |          |          |
|---|----------|----------|----------|
| H | -0.99099 | +0.21468 | -0.39201 |
| H | +0.68900 | +0.74416 | -0.39725 |
| H | +0.29464 | -0.97906 | -0.37893 |
| H | -0.87270 | +2.00281 | +2.09918 |

\* E = +10.165 kcal/mol ; Conformer 031

|   |          |          |          |
|---|----------|----------|----------|
| C | +0.00000 | +0.00000 | +0.00000 |
| C | +0.00000 | +0.00000 | +1.49719 |
| C | +1.35221 | +0.00000 | +2.17666 |
| C | +1.54473 | +1.14563 | +3.15464 |
| C | +1.66972 | +2.46012 | +2.42794 |
| O | +1.64386 | +3.58391 | +3.15061 |
| C | +1.39296 | +3.55404 | +4.53660 |
| O | +1.82692 | +2.53538 | +1.24353 |
| H | +1.51815 | +4.57329 | +4.88018 |
| H | +0.37525 | +3.23208 | +4.74566 |
| H | +2.09767 | +2.91390 | +5.06211 |
| H | +0.72210 | +1.18866 | +3.86677 |
| H | +2.45351 | +1.00398 | +3.74202 |
| H | +1.49569 | -0.93741 | +2.71288 |
| H | +2.13322 | +0.06681 | +1.42201 |
| H | -0.60264 | +1.13111 | +1.83062 |
| H | -0.70416 | -0.70305 | +1.93554 |
| H | -1.00722 | +0.08477 | -0.40055 |
| H | +0.59665 | +0.82885 | -0.37320 |
| H | +0.43165 | -0.92561 | -0.38589 |
| H | -1.05098 | +1.92570 | +2.07831 |

21

\* E = +10.267 kcal/mol ; Conformer 032

|   |          |          |          |
|---|----------|----------|----------|
| C | +0.00000 | +0.00000 | +0.00000 |
| C | +0.00000 | +0.00000 | +1.49760 |
| C | +1.32616 | +0.00000 | +2.20216 |
| C | +2.26442 | +1.10225 | +1.71108 |
| C | +3.46677 | +1.18996 | +2.60774 |
| O | +3.38800 | +1.95171 | +3.70637 |
| C | +2.28234 | +2.79484 | +3.94334 |
| O | +4.46605 | +0.56184 | +2.40961 |
| H | +2.43071 | +3.20033 | +4.93651 |
| H | +2.25190 | +3.61327 | +3.22763 |
| H | +1.33961 | +2.25361 | +3.91726 |
| H | +2.63633 | +0.86503 | +0.72016 |
| H | +1.72743 | +2.04672 | +1.65371 |
| H | +1.15644 | +0.10208 | +3.27456 |
| H | +1.82377 | -0.96310 | +2.06872 |
| H | -0.53877 | +1.16164 | +1.86151 |
| H | -0.70453 | -0.70284 | +1.93348 |
| H | -1.01295 | +0.01900 | -0.39248 |
| H | +0.52921 | +0.86012 | -0.40466 |

|   |          |          |          |
|---|----------|----------|----------|
| H | +0.48840 | -0.89596 | -0.38798 |
| H | -0.84708 | +2.00549 | +2.14014 |

\* E = +10.364 kcal/mol ; Conformer 033

|   |          |          |          |
|---|----------|----------|----------|
| C | +0.00000 | +0.00000 | +0.00000 |
| C | +0.00000 | +0.00000 | +1.49683 |
| C | +1.34756 | +0.00000 | +2.15691 |
| C | +1.27225 | +0.00340 | +3.68469 |
| C | +0.69168 | -1.28472 | +4.19814 |
| O | +1.51439 | -2.32061 | +4.41367 |
| C | +2.91468 | -2.18372 | +4.33921 |
| O | -0.48294 | -1.44155 | +4.36914 |
| H | +3.31460 | -3.18120 | +4.47369 |
| H | +3.23679 | -1.80079 | +3.37410 |
| H | +3.29147 | -1.54267 | +5.13309 |
| H | +2.25386 | +0.19757 | +4.10723 |
| H | +0.60342 | +0.79512 | +4.00862 |
| H | +1.92325 | -0.86298 | +1.80820 |
| H | +1.90521 | +0.88063 | +1.83599 |
| H | -0.51434 | +1.17430 | +1.84560 |
| H | -0.71103 | -0.68587 | +1.94757 |
| H | -1.00554 | +0.11610 | -0.39536 |
| H | +0.61372 | +0.80740 | -0.39616 |
| H | +0.39966 | -0.93765 | -0.39022 |
| H | -0.79979 | +2.04131 | +2.06481 |

\* E = +10.487 kcal/mol ; Conformer 034

|   |          |          |          |
|---|----------|----------|----------|
| C | +0.00000 | +0.00000 | +0.00000 |
| C | +0.00000 | +0.00000 | +1.49714 |
| C | +1.34181 | +0.00000 | +2.16636 |
| C | +1.23875 | +0.12901 | +3.68315 |
| C | +2.60789 | +0.14617 | +4.30465 |
| O | +3.16447 | -1.01530 | +4.67517 |
| C | +2.45508 | -2.23020 | +4.60826 |
| O | +3.24036 | +1.15342 | +4.43319 |
| H | +3.16969 | -3.00236 | +4.86546 |
| H | +1.63823 | -2.25201 | +5.32618 |
| H | +2.07178 | -2.42290 | +3.60898 |
| H | +0.77642 | +1.07957 | +3.93030 |
| H | +0.61311 | -0.66376 | +4.08583 |
| H | +1.87855 | -0.91620 | +1.89969 |
| H | +1.94561 | +0.82298 | +1.78460 |
| H | -0.54809 | +1.16496 | +1.84660 |
| H | -0.70411 | -0.70297 | +1.93761 |
| H | -1.00697 | +0.09730 | -0.39719 |
| H | +0.59835 | +0.82028 | -0.39128 |
| H | +0.42061 | -0.92773 | -0.39172 |
| H | -0.89371 | +2.00633 | +2.06701 |

\* E = +10.497 kcal/mol ; Conformer 035

|   |          |          |          |
|---|----------|----------|----------|
| C | +0.00000 | +0.00000 | +0.00000 |
| C | +0.00000 | +0.00000 | +1.49916 |
| C | +1.34904 | +0.00000 | +2.16988 |
| C | +2.01995 | +1.36359 | +2.16889 |
| C | +1.54546 | +2.22007 | +3.31657 |
| O | +1.87656 | +3.51649 | +3.30567 |
| C | +2.57185 | +4.08874 | +2.22275 |
| O | +0.93044 | +1.78880 | +4.24694 |
| H | +2.79519 | +5.10540 | +2.52153 |
| H | +3.50403 | +3.56735 | +2.01816 |
| H | +1.95805 | +4.11138 | +1.32503 |
| H | +3.10171 | +1.26492 | +2.27267 |
| H | +1.85539 | +1.87866 | +1.22361 |
| H | +1.25885 | -0.33325 | +3.19928 |
| H | +1.99613 | -0.71073 | +1.65035 |
| H | -0.57884 | +1.16335 | +1.81244 |
| H | -0.70358 | -0.70403 | +1.93152 |
| H | -1.00277 | +0.13074 | -0.39887 |
| H | +0.62235 | +0.79820 | -0.40268 |
| H | +0.39068 | -0.94251 | -0.38705 |
| H | -0.96293 | +2.00776 | +1.92207 |

\* E = +10.713 kcal/mol ; Conformer 036

|   |          |          |          |
|---|----------|----------|----------|
| C | +0.00000 | +0.00000 | +0.00000 |
| C | +0.00000 | +0.00000 | +1.49801 |
| C | +1.33471 | +0.00000 | +2.18500 |
| C | +2.09089 | -1.31732 | +1.98649 |
| C | +3.43927 | -1.25020 | +2.64961 |
| O | +3.55123 | -1.63222 | +3.92833 |
| C | +2.47275 | -2.21273 | +4.62441 |
| O | +4.40454 | -0.81724 | +2.09059 |
| H | +2.81043 | -2.32658 | +5.64709 |
| H | +1.59122 | -1.57638 | +4.61271 |
| H | +2.22490 | -3.19295 | +4.22331 |
| H | +1.49334 | -2.15113 | +2.34686 |
| H | +2.28383 | -1.47223 | +0.92995 |
| H | +1.95119 | +0.81015 | +1.79710 |
| H | +1.19829 | +0.19267 | +3.24933 |
| H | -0.54661 | +1.15940 | +1.84653 |
| H | -0.70992 | -0.69927 | +1.93492 |
| H | -1.00001 | +0.16399 | -0.39356 |
| H | +0.64997 | +0.78057 | -0.39061 |
| H | +0.35233 | -0.95146 | -0.40103 |
| H | -0.90767 | +1.99151 | +2.08128 |

\* E = +10.746 kcal/mol ; Conformer 037



|   |          |          |          |
|---|----------|----------|----------|
| C | +0.00000 | +0.00000 | +0.00000 |
| C | +0.00000 | +0.00000 | +1.49822 |
| C | +1.33287 | +0.00000 | +2.18802 |
| C | +2.08334 | -1.32259 | +2.00255 |
| C | +3.37105 | -1.30505 | +2.77951 |
| O | +4.47909 | -0.84459 | +2.18436 |
| C | +4.49848 | -0.50714 | +0.81671 |
| O | +3.42885 | -1.63761 | +3.92739 |
| H | +5.47515 | -0.07621 | +0.63424 |
| H | +4.37887 | -1.38851 | +0.19054 |
| H | +3.73631 | +0.22723 | +0.56763 |
| H | +1.49058 | -2.13320 | +2.41529 |
| H | +2.24454 | -1.52491 | +0.94717 |
| H | +1.93581 | +0.82756 | +1.81058 |
| H | +1.20118 | +0.16945 | +3.25507 |
| H | -0.54629 | +1.16216 | +1.84169 |
| H | -0.70806 | -0.69963 | +1.93602 |
| H | -1.00042 | +0.15850 | -0.39469 |
| H | +0.64320 | +0.78661 | -0.39163 |
| H | +0.35661 | -0.94984 | -0.40180 |
| H | -0.90257 | +1.99875 | +2.06336 |

\* E = +11.138 kcal/mol ; Conformer 038

|   |          |          |          |
|---|----------|----------|----------|
| C | +0.00000 | +0.00000 | +0.00000 |
| C | +0.00000 | +0.00000 | +1.49839 |
| C | +1.32581 | +0.00000 | +2.20505 |
| C | +2.22396 | +1.17230 | +1.81518 |
| C | +3.47582 | +1.16500 | +2.64832 |
| O | +4.55222 | +0.50881 | +2.19370 |
| C | +4.57868 | -0.06986 | +0.90992 |
| O | +3.53027 | +1.68115 | +3.72617 |
| H | +3.75566 | -0.76466 | +0.75986 |
| H | +4.56440 | +0.69066 | +0.13235 |
| H | +5.51325 | -0.61416 | +0.85202 |
| H | +2.44344 | +1.15481 | +0.75167 |
| H | +1.71083 | +2.10286 | +2.03929 |
| H | +1.16570 | +0.03495 | +3.28110 |
| H | +1.83869 | -0.94626 | +2.00356 |
| H | -0.57381 | +1.15566 | +1.85145 |
| H | -0.69613 | -0.71410 | +1.92905 |
| H | -1.01374 | -0.00327 | -0.39121 |
| H | +0.50524 | +0.87335 | -0.40713 |
| H | +0.50562 | -0.88545 | -0.39141 |
| H | -0.94405 | +1.98113 | +2.08226 |

\* E = +11.165 kcal/mol ; Conformer 039

|   |          |          |          |
|---|----------|----------|----------|
| C | +0.00000 | +0.00000 | +0.00000 |
| C | +0.00000 | +0.00000 | +1.49747 |

|   |          |          |          |
|---|----------|----------|----------|
| C | +1.35311 | +0.00000 | +2.14952 |
| C | +1.32197 | -0.28651 | +3.65035 |
| C | +0.34926 | +0.59500 | +4.38935 |
| O | +0.75248 | +1.79798 | +4.81329 |
| C | +2.09482 | +2.20938 | +4.70022 |
| O | -0.78525 | +0.26528 | +4.58167 |
| H | +2.11365 | +3.24278 | +5.02366 |
| H | +2.74271 | +1.62469 | +5.34974 |
| H | +2.45301 | +2.15469 | +3.67588 |
| H | +0.96816 | -1.30038 | +3.81017 |
| H | +2.32510 | -0.21359 | +4.06271 |
| H | +1.98355 | -0.76060 | +1.68249 |
| H | +1.84491 | +0.95331 | +1.94616 |
| H | -0.52615 | +1.17057 | +1.82452 |
| H | -0.70802 | -0.68812 | +1.95071 |
| H | -1.00455 | +0.12188 | -0.39610 |
| H | +0.61632 | +0.80679 | -0.39376 |
| H | +0.39842 | -0.93753 | -0.39138 |
| H | -0.80983 | +2.04875 | +2.00154 |

\* E = +11.267 kcal/mol ; Conformer 040

|   |          |          |          |
|---|----------|----------|----------|
| C | +0.00000 | +0.00000 | +0.00000 |
| C | +0.00000 | +0.00000 | +1.49901 |
| C | +1.33079 | +0.00000 | +2.20375 |
| C | +1.85662 | -1.39868 | +2.55004 |
| C | +1.94764 | -2.29218 | +1.34523 |
| O | +3.04172 | -2.23387 | +0.57562 |
| C | +4.18586 | -1.51214 | +0.97196 |
| O | +1.05238 | -3.01695 | +1.01730 |
| H | +4.87480 | -1.57316 | +0.13867 |
| H | +3.96138 | -0.46755 | +1.16959 |
| H | +4.64989 | -1.96126 | +1.84717 |
| H | +2.81207 | -1.31397 | +3.06225 |
| H | +1.15736 | -1.88345 | +3.22404 |
| H | +2.05735 | +0.54327 | +1.59925 |
| H | +1.24851 | +0.54536 | +3.14410 |
| H | -0.54158 | +1.15119 | +1.83486 |
| H | -0.70960 | -0.69987 | +1.93362 |
| H | -1.00552 | +0.14180 | -0.38839 |
| H | +0.62665 | +0.80067 | -0.38948 |
| H | +0.36998 | -0.94412 | -0.39840 |
| H | -0.89554 | +1.99268 | +2.08357 |

\* E = +12.221 kcal/mol ; Conformer 041

|   |          |          |          |
|---|----------|----------|----------|
| C | +0.00000 | +0.00000 | +0.00000 |
| C | +0.00000 | +0.00000 | +1.49679 |
| C | +1.32384 | +0.00000 | +2.20984 |
| C | +2.25228 | +1.15502 | +1.79897 |

|   |          |          |          |
|---|----------|----------|----------|
| C | +3.21625 | +0.76861 | +0.71174 |
| O | +4.25773 | -0.00756 | +1.04889 |
| C | +4.61254 | -0.22430 | +2.39557 |
| O | +3.08388 | +1.08056 | -0.43578 |
| H | +5.43102 | -0.93322 | +2.37310 |
| H | +4.95611 | +0.69615 | +2.86283 |
| H | +3.79552 | -0.64570 | +2.97535 |
| H | +1.66831 | +1.98838 | +1.42099 |
| H | +2.80367 | +1.51321 | +2.66484 |
| H | +1.14220 | +0.05457 | +3.28185 |
| H | +1.81874 | -0.95989 | +2.03535 |
| H | -0.55425 | +1.15646 | +1.85906 |
| H | -0.69985 | -0.70727 | +1.93425 |
| H | -1.01387 | +0.06000 | -0.38698 |
| H | +0.57401 | +0.82771 | -0.40812 |
| H | +0.44819 | -0.91697 | -0.38774 |
| H | -0.89989 | +1.98842 | +2.12124 |

### S.2.6 (TS<sub>δ</sub>)<sup>‡</sup>

\* E = +0.000 kcal/mol ; Conformer 001

|   |          |          |          |
|---|----------|----------|----------|
| C | +0.00000 | +0.00000 | +0.00000 |
| C | +0.00000 | +0.00000 | +1.49535 |
| C | +1.40110 | +0.00000 | +2.07976 |
| C | +1.41393 | +0.00536 | +3.59306 |
| C | +0.93933 | +1.30088 | +4.17712 |
| O | +0.71710 | +1.19859 | +5.48536 |
| C | +0.30435 | +2.39231 | +6.12702 |
| O | +0.78946 | +2.32685 | +3.56938 |
| H | +0.17077 | +2.13697 | +7.17014 |
| H | +1.06037 | +3.16332 | +6.01590 |
| H | -0.62675 | +2.74999 | +5.69880 |
| H | +0.80804 | -0.79940 | +4.00685 |
| H | +2.42196 | -0.15526 | +3.97609 |
| H | +1.93845 | -0.87846 | +1.72499 |
| H | +1.94056 | +0.87426 | +1.71799 |
| H | -0.53539 | +0.88188 | +1.85589 |
| H | -0.55077 | -0.86868 | +1.86116 |
| H | +0.61683 | -1.16783 | -0.37345 |
| H | -0.96726 | -0.09648 | -0.47954 |
| H | +0.62707 | +0.75028 | -0.47027 |
| H | +1.02017 | -1.95797 | -0.57060 |

\* E = +0.320 kcal/mol ; Conformer 002

|   |          |          |          |
|---|----------|----------|----------|
| C | +0.00000 | +0.00000 | +0.00000 |
| C | +0.00000 | +0.00000 | +1.49582 |
| C | +1.40950 | +0.00000 | +2.07384 |
| C | +1.42421 | -0.00003 | +3.58832 |

|   |          |          |          |
|---|----------|----------|----------|
| C | +0.95122 | +1.29497 | +4.17514 |
| O | +0.70334 | +1.18346 | +5.47775 |
| C | +0.29172 | +2.37625 | +6.12228 |
| O | +0.82488 | +2.32736 | +3.57331 |
| H | +0.13615 | +2.11337 | +7.16045 |
| H | +1.05803 | +3.13974 | +6.03173 |
| H | -0.62737 | +2.74754 | +5.68003 |
| H | +0.81912 | -0.80603 | +4.00038 |
| H | +2.43366 | -0.16026 | +3.96824 |
| H | +1.94852 | -0.87682 | +1.71717 |
| H | +1.94704 | +0.87585 | +1.71466 |
| H | -0.53016 | +0.87809 | +1.86164 |
| H | -0.53616 | -0.87653 | +1.86332 |
| H | -1.31661 | -0.02250 | -0.38978 |
| H | +0.35731 | +0.90930 | -0.47101 |
| H | +0.38705 | -0.89522 | -0.47573 |
| H | -2.19378 | -0.04084 | -0.60947 |

\* E = +0.332 kcal/mol ; Conformer 003

|   |          |          |          |
|---|----------|----------|----------|
| C | +0.00000 | +0.00000 | +0.00000 |
| C | +0.00000 | +0.00000 | +1.49783 |
| C | +1.38510 | +0.00000 | +2.12515 |
| C | +2.26487 | -1.16214 | +1.71067 |
| C | +1.73461 | -2.49117 | +2.15169 |
| O | +2.38772 | -3.49613 | +1.57519 |
| C | +1.96076 | -4.79309 | +1.95060 |
| O | +0.84743 | -2.65951 | +2.94552 |
| H | +2.58667 | -5.48231 | +1.39885 |
| H | +2.08172 | -4.93825 | +3.01965 |
| H | +0.91615 | -4.93568 | +1.69233 |
| H | +2.41901 | -1.20024 | +0.63431 |
| H | +3.25855 | -1.06207 | +2.14822 |
| H | +1.89906 | +0.92442 | +1.86080 |
| H | +1.27939 | -0.00675 | +3.20804 |
| H | -0.53451 | +0.88548 | +1.85067 |
| H | -0.56574 | -0.85439 | +1.86755 |
| H | +0.29129 | -1.26843 | -0.41032 |
| H | -0.96964 | +0.13020 | -0.46715 |
| H | +0.77368 | +0.58992 | -0.48320 |
| H | +0.45237 | -2.13402 | -0.65117 |

\* E = +0.452 kcal/mol ; Conformer 004

|   |          |          |          |
|---|----------|----------|----------|
| C | +0.00000 | +0.00000 | +0.00000 |
| C | +0.00000 | +0.00000 | +1.49606 |
| C | +1.40714 | +0.00000 | +2.07658 |
| C | +1.39827 | -0.00002 | +3.58897 |
| C | +2.77513 | -0.00001 | +4.17562 |
| O | +2.74095 | +0.00018 | +5.50680 |

|   |          |          |          |
|---|----------|----------|----------|
| C | +4.00496 | +0.00017 | +6.14642 |
| O | +3.79984 | -0.00016 | +3.54910 |
| H | +3.79942 | +0.00042 | +7.20895 |
| H | +4.57113 | -0.88281 | +5.86684 |
| H | +4.57133 | +0.88289 | +5.86647 |
| H | +0.87037 | +0.86813 | +3.98402 |
| H | +0.87041 | -0.86823 | +3.98399 |
| H | +1.95769 | -0.86881 | +1.71953 |
| H | +1.95767 | +0.86883 | +1.71955 |
| H | -0.54111 | +0.87371 | +1.86204 |
| H | -0.54111 | -0.87371 | +1.86204 |
| H | -1.31845 | +0.00003 | -0.38834 |
| H | +0.37324 | +0.90178 | -0.47334 |
| H | +0.37320 | -0.90180 | -0.47334 |
| H | -2.19609 | +0.00007 | -0.60324 |

\* E = +0.453 kcal/mol ; Conformer 005

|   |          |          |          |
|---|----------|----------|----------|
| C | +0.00000 | +0.00000 | +0.00000 |
| C | +0.00000 | +0.00000 | +1.49587 |
| C | +1.40027 | +0.00000 | +2.08267 |
| C | +1.41400 | -0.09078 | +3.59345 |
| C | +0.88520 | +1.14120 | +4.26234 |
| O | +0.66966 | +0.94009 | +5.56079 |
| C | +0.20833 | +2.06916 | +6.28144 |
| O | +0.69085 | +2.19843 | +3.72602 |
| H | +0.08781 | +1.73855 | +7.30484 |
| H | +0.93087 | +2.87720 | +6.22320 |
| H | -0.73788 | +2.41549 | +5.87770 |
| H | +0.84315 | -0.94584 | +3.95294 |
| H | +2.42847 | -0.23298 | +3.96675 |
| H | +1.96165 | -0.84244 | +1.67877 |
| H | +1.91699 | +0.90680 | +1.77277 |
| H | -0.54559 | +0.86786 | +1.86398 |
| H | -0.54095 | -0.88219 | +1.85538 |
| H | +0.63380 | +1.15526 | -0.38528 |
| H | +0.61550 | -0.75886 | -0.47300 |
| H | -0.96656 | +0.10949 | -0.47805 |
| H | +1.05104 | +1.92885 | -0.60992 |

\* E = +0.478 kcal/mol ; Conformer 006

|   |          |          |          |
|---|----------|----------|----------|
| C | +0.00000 | +0.00000 | +0.00000 |
| C | +0.00000 | +0.00000 | +1.49589 |
| C | +1.39840 | +0.00000 | +2.08363 |
| C | +1.38502 | +0.01531 | +3.59509 |
| C | +2.75777 | -0.03602 | +4.18875 |
| O | +2.72226 | +0.06869 | +5.51612 |
| C | +3.98174 | +0.01815 | +6.16241 |
| O | +3.78044 | -0.16103 | +3.57166 |

|   |          |          |          |
|---|----------|----------|----------|
| H | +3.77622 | +0.11713 | +7.22035 |
| H | +4.47633 | -0.92586 | +5.95588 |
| H | +4.61665 | +0.82883 | +5.81886 |
| H | +0.88609 | +0.90322 | +3.98257 |
| H | +0.82644 | -0.83231 | +3.99441 |
| H | +1.94702 | -0.87502 | +1.73816 |
| H | +1.95185 | +0.86324 | +1.71704 |
| H | -0.55580 | +0.86629 | +1.85933 |
| H | -0.54654 | -0.87655 | +1.85870 |
| H | +0.57207 | +1.18921 | -0.37069 |
| H | +0.65478 | -0.72467 | -0.47259 |
| H | -0.97038 | +0.06278 | -0.47877 |
| H | +0.94140 | +1.99532 | -0.56764 |

\* E = +0.491 kcal/mol ; Conformer 007

|   |          |          |          |
|---|----------|----------|----------|
| C | +0.00000 | +0.00000 | +0.00000 |
| C | +0.00000 | +0.00000 | +1.49758 |
| C | +1.37611 | +0.00000 | +2.14462 |
| C | +2.20911 | +1.23388 | +1.85006 |
| C | +2.98293 | +1.15246 | +0.56927 |
| O | +3.48027 | +2.33646 | +0.22598 |
| C | +4.23647 | +2.35355 | -0.97115 |
| O | +3.17653 | +0.15301 | -0.07014 |
| H | +4.56728 | +3.37616 | -1.09800 |
| H | +5.08642 | +1.68273 | -0.89386 |
| H | +3.61895 | +2.04573 | -1.80931 |
| H | +1.60427 | +2.13923 | +1.82397 |
| H | +2.94998 | +1.39342 | +2.63406 |
| H | +1.24666 | -0.08178 | +3.22208 |
| H | +1.93196 | -0.87964 | +1.82311 |
| H | -0.57491 | +0.85409 | +1.86247 |
| H | -0.53975 | -0.88546 | +1.84428 |
| H | +0.38788 | +1.24230 | -0.41967 |
| H | +0.73648 | -0.63688 | -0.47605 |
| H | -0.97992 | -0.05615 | -0.46110 |
| H | +0.60809 | +2.08770 | -0.68301 |

\* E = +0.656 kcal/mol ; Conformer 008

|   |          |          |          |
|---|----------|----------|----------|
| C | +0.00000 | +0.00000 | +0.00000 |
| C | +0.00000 | +0.00000 | +1.49817 |
| C | +1.38244 | +0.00000 | +2.12604 |
| C | +2.20075 | -1.22242 | +1.77237 |
| C | +3.50880 | -1.26237 | +2.49765 |
| O | +4.21688 | -2.34303 | +2.17510 |
| C | +5.47263 | -2.46022 | +2.81932 |
| O | +3.89936 | -0.43753 | +3.27926 |
| H | +5.90996 | -3.37916 | +2.45109 |
| H | +6.10456 | -1.61185 | +2.57561 |

|   |          |          |          |
|---|----------|----------|----------|
| H | +5.34396 | -2.50306 | +3.89640 |
| H | +1.66288 | -2.14227 | +2.00448 |
| H | +2.41449 | -1.27693 | +0.70583 |
| H | +1.92511 | +0.89421 | +1.82066 |
| H | +1.29289 | +0.06343 | +3.20839 |
| H | -0.53879 | +0.88365 | +1.84884 |
| H | -0.57358 | -0.85539 | +1.86164 |
| H | +0.30607 | -1.26414 | -0.42398 |
| H | -0.96937 | +0.12564 | -0.46900 |
| H | +0.77019 | +0.59985 | -0.47565 |
| H | +0.47322 | -2.11933 | -0.68527 |

\* E = +0.683 kcal/mol ; Conformer 009

|   |          |          |          |
|---|----------|----------|----------|
| C | +0.00000 | +0.00000 | +0.00000 |
| C | +0.00000 | +0.00000 | +1.49702 |
| C | +1.38724 | +0.00000 | +2.12181 |
| C | +2.20042 | -1.24582 | +1.83479 |
| C | +1.63695 | -2.47308 | +2.48307 |
| O | +2.18495 | -3.58389 | +1.99546 |
| C | +1.74309 | -4.79122 | +2.59067 |
| O | +0.80958 | -2.48404 | +3.35473 |
| H | +2.28114 | -5.58391 | +2.08739 |
| H | +1.96496 | -4.79326 | +3.65328 |
| H | +0.67263 | -4.91032 | +2.45591 |
| H | +2.31200 | -1.43893 | +0.77018 |
| H | +3.21563 | -1.13489 | +2.21712 |
| H | +1.94178 | +0.86669 | +1.76403 |
| H | +1.28626 | +0.10431 | +3.19989 |
| H | -0.54291 | +0.87553 | +1.85181 |
| H | -0.55650 | -0.86403 | +1.86893 |
| H | +0.65569 | +1.14440 | -0.37522 |
| H | +0.58659 | -0.76885 | -0.49147 |
| H | -0.96679 | +0.13560 | -0.47120 |
| H | +1.08445 | +1.92059 | -0.57943 |

\* E = +0.910 kcal/mol ; Conformer 010

|   |          |          |          |
|---|----------|----------|----------|
| C | +0.00000 | +0.00000 | +0.00000 |
| C | +0.00000 | +0.00000 | +1.49775 |
| C | +1.39850 | +0.00000 | +2.10899 |
| C | +2.21553 | -1.23263 | +1.78037 |
| C | +1.67167 | -2.47682 | +2.41328 |
| O | +2.19250 | -3.57467 | +1.86995 |
| C | +1.76714 | -4.79766 | +2.44523 |
| O | +0.88071 | -2.50966 | +3.31736 |
| H | +2.27800 | -5.57722 | +1.89530 |
| H | +2.03315 | -4.83443 | +3.49702 |
| H | +0.69117 | -4.90593 | +2.35179 |
| H | +2.30204 | -1.39858 | +0.70869 |

|   |          |          |          |
|---|----------|----------|----------|
| H | +3.23721 | -1.12391 | +2.14580 |
| H | +1.94335 | +0.87904 | +1.76622 |
| H | +1.30669 | +0.07932 | +3.19056 |
| H | -0.52635 | +0.88430 | +1.85574 |
| H | -0.55082 | -0.86017 | +1.87488 |
| H | -1.30637 | +0.13930 | -0.38020 |
| H | +0.45957 | +0.86237 | -0.47284 |
| H | +0.26630 | -0.93000 | -0.49042 |
| H | -2.18186 | +0.24040 | -0.59617 |

\* E = +0.928 kcal/mol ; Conformer 011

|   |          |          |          |
|---|----------|----------|----------|
| C | +0.00000 | +0.00000 | +0.00000 |
| C | +0.00000 | +0.00000 | +1.49778 |
| C | +1.39585 | +0.00000 | +2.11040 |
| C | +2.19486 | -1.23682 | +1.76466 |
| C | +3.52291 | -1.27564 | +2.45333 |
| O | +4.21514 | -2.36430 | +2.12287 |
| C | +5.48738 | -2.48343 | +2.73432 |
| O | +3.93869 | -0.44460 | +3.21440 |
| H | +5.90879 | -3.40881 | +2.36378 |
| H | +6.11759 | -1.64162 | +2.46499 |
| H | +5.38727 | -2.51473 | +3.81477 |
| H | +1.65590 | -2.14490 | +2.03811 |
| H | +2.37835 | -1.31571 | +0.69376 |
| H | +1.94316 | +0.88402 | +1.78614 |
| H | +1.31626 | +0.07835 | +3.19306 |
| H | -0.53118 | +0.88133 | +1.85589 |
| H | -0.55560 | -0.86429 | +1.86385 |
| H | -1.30646 | +0.15199 | -0.37861 |
| H | +0.46742 | +0.85969 | -0.46948 |
| H | +0.26078 | -0.93222 | -0.48883 |
| H | -2.18193 | +0.26253 | -0.58646 |

\* E = +1.008 kcal/mol ; Conformer 012

|   |          |          |          |
|---|----------|----------|----------|
| C | +0.00000 | +0.00000 | +0.00000 |
| C | +0.00000 | +0.00000 | +1.49553 |
| C | +1.39951 | +0.00000 | +2.08280 |
| C | +1.40338 | -0.00570 | +3.60078 |
| C | +0.75467 | +1.19127 | +4.22772 |
| O | +1.05574 | +2.32054 | +3.58675 |
| C | +0.50926 | +3.50035 | +4.14860 |
| O | +0.06187 | +1.16843 | +5.20872 |
| H | +0.84185 | +4.31260 | +3.51538 |
| H | -0.57482 | +3.44581 | +4.16372 |
| H | +0.86644 | +3.63635 | +5.16459 |
| H | +0.89710 | -0.87998 | +4.00016 |
| H | +2.42887 | -0.03345 | +3.97001 |
| H | +1.93791 | -0.87837 | +1.72911 |



|   |          |          |          |
|---|----------|----------|----------|
| H | +1.94368 | +0.87198 | +1.72380 |
| H | -0.54127 | +0.88105 | +1.85508 |
| H | -0.55472 | -0.86427 | +1.86390 |
| H | +0.61093 | -1.16964 | -0.37336 |
| H | -0.96762 | -0.09220 | -0.47944 |
| H | +0.63161 | +0.74582 | -0.47150 |
| H | +1.01165 | -1.96028 | -0.57376 |

\* E = +1.076 kcal/mol ; Conformer 013

|   |          |          |          |
|---|----------|----------|----------|
| C | +0.00000 | +0.00000 | +0.00000 |
| C | +0.00000 | +0.00000 | +1.49748 |
| C | +1.38347 | +0.00000 | +2.12674 |
| C | +2.18773 | -1.24063 | +1.80480 |
| C | +3.48160 | -1.29758 | +2.55562 |
| O | +4.22479 | -2.33429 | +2.17223 |
| C | +5.46343 | -2.47412 | +2.84501 |
| O | +3.83012 | -0.52543 | +3.40686 |
| H | +5.93461 | -3.35057 | +2.41947 |
| H | +6.08045 | -1.59475 | +2.68919 |
| H | +5.30350 | -2.60565 | +3.91065 |
| H | +1.63045 | -2.14562 | +2.05297 |
| H | +2.42137 | -1.31953 | +0.74461 |
| H | +1.93459 | +0.88129 | +1.80138 |
| H | +1.29259 | +0.08485 | +3.20728 |
| H | -0.54945 | +0.87077 | +1.85346 |
| H | -0.55892 | -0.87065 | +1.85686 |
| H | +0.67405 | +1.13477 | -0.37748 |
| H | +0.57565 | -0.77892 | -0.48802 |
| H | -0.96421 | +0.15029 | -0.47189 |
| H | +1.11327 | +1.90073 | -0.59081 |

\* E = +1.109 kcal/mol ; Conformer 014

|   |          |          |          |
|---|----------|----------|----------|
| C | +0.00000 | +0.00000 | +0.00000 |
| C | +0.00000 | +0.00000 | +1.49571 |
| C | +1.39871 | +0.00000 | +2.08493 |
| C | +1.39995 | -0.03682 | +3.60299 |
| C | +0.73168 | +1.14019 | +4.24727 |
| O | +1.04829 | +2.28603 | +3.64678 |
| C | +0.47865 | +3.44983 | +4.21844 |
| O | +0.01003 | +1.08730 | +5.20629 |
| H | +0.82558 | +4.27761 | +3.61377 |
| H | -0.60504 | +3.38957 | +4.19905 |
| H | +0.80425 | +3.56423 | +5.24766 |
| H | +0.90315 | -0.92482 | +3.98366 |
| H | +2.42506 | -0.05716 | +3.97336 |
| H | +1.94676 | -0.86720 | +1.71685 |
| H | +1.93467 | +0.88317 | +1.74255 |
| H | -0.55024 | +0.86986 | +1.85854 |

|   |          |          |          |
|---|----------|----------|----------|
| H | -0.54713 | -0.87490 | +1.86071 |
| H | +0.60126 | +1.17451 | -0.37647 |
| H | +0.63668 | -0.74084 | -0.47290 |
| H | -0.96884 | +0.08407 | -0.47849 |
| H | +0.99251 | +1.96694 | -0.58352 |

\* E = +1.150 kcal/mol ; Conformer 015

|   |          |          |          |
|---|----------|----------|----------|
| C | +0.00000 | +0.00000 | +0.00000 |
| C | +0.00000 | +0.00000 | +1.49743 |
| C | +1.39388 | +0.00000 | +2.11908 |
| C | +2.24047 | +1.19224 | +1.71383 |
| C | +2.88990 | +1.02155 | +0.37403 |
| O | +3.10549 | +2.18901 | -0.22746 |
| C | +3.77525 | +2.11458 | -1.47401 |
| O | +3.22106 | -0.02930 | -0.10604 |
| H | +3.87257 | +3.13555 | -1.81937 |
| H | +4.75188 | +1.65665 | -1.35258 |
| H | +3.19719 | +1.52548 | -2.17905 |
| H | +1.67155 | +2.11964 | +1.71830 |
| H | +3.05965 | +1.33068 | +2.42048 |
| H | +1.28824 | -0.00762 | +3.20257 |
| H | +1.92398 | -0.90940 | +1.84120 |
| H | -0.55200 | +0.86761 | +1.86136 |
| H | -0.53392 | -0.87919 | +1.85782 |
| H | -1.30765 | -0.16368 | -0.37603 |
| H | +0.24712 | +0.93977 | -0.48363 |
| H | +0.48584 | -0.84685 | -0.47159 |
| H | -2.18154 | -0.28383 | -0.58252 |

\* E = +1.265 kcal/mol ; Conformer 016

|   |          |          |          |
|---|----------|----------|----------|
| C | +0.00000 | +0.00000 | +0.00000 |
| C | +0.00000 | +0.00000 | +1.49593 |
| C | +1.40829 | +0.00000 | +2.07582 |
| C | +1.41787 | -0.01798 | +3.59469 |
| C | +0.76711 | +1.17048 | +4.23570 |
| O | +1.04939 | +2.30519 | +3.59645 |
| C | +0.49789 | +3.47724 | +4.17008 |
| O | +0.08881 | +1.13571 | +5.22627 |
| H | +0.81495 | +4.29539 | +3.53651 |
| H | -0.58529 | +3.41166 | +4.19734 |
| H | +0.86579 | +3.61222 | +5.18235 |
| H | +0.91708 | -0.89781 | +3.98877 |
| H | +2.44528 | -0.04440 | +3.95900 |
| H | +1.94976 | -0.87402 | +1.71566 |
| H | +1.94801 | +0.87610 | +1.72158 |
| H | -0.53482 | +0.87792 | +1.86041 |
| H | -0.54062 | -0.87188 | +1.86595 |
| H | -1.31632 | +0.00075 | -0.39130 |

|   |          |          |          |
|---|----------|----------|----------|
| H | +0.37483 | +0.90171 | -0.47234 |
| H | +0.37203 | -0.90221 | -0.47394 |
| H | -2.19310 | +0.00017 | -0.61257 |

\* E = +1.333 kcal/mol ; Conformer 017

|   |          |          |          |
|---|----------|----------|----------|
| C | +0.00000 | +0.00000 | +0.00000 |
| C | +0.00000 | +0.00000 | +1.49587 |
| C | +1.39867 | +0.00000 | +2.08390 |
| C | +1.37895 | -0.00398 | +3.60320 |
| C | +2.74108 | -0.00935 | +4.22347 |
| O | +3.51190 | -0.97446 | +3.72318 |
| C | +4.81526 | -1.05524 | +4.27177 |
| O | +3.11865 | +0.74378 | +5.07963 |
| H | +5.30205 | -1.87585 | +3.76091 |
| H | +5.35395 | -0.12768 | +4.10557 |
| H | +4.76561 | -1.24478 | +5.33949 |
| H | +0.85655 | +0.86358 | +3.99507 |
| H | +0.85579 | -0.89279 | +3.95883 |
| H | +1.94833 | -0.87013 | +1.72904 |
| H | +1.93765 | +0.87784 | +1.72699 |
| H | -0.55479 | +0.86540 | +1.86146 |
| H | -0.54321 | -0.87822 | +1.85941 |
| H | +0.59824 | +1.17605 | -0.37324 |
| H | +0.63842 | -0.73928 | -0.47253 |
| H | -0.96897 | +0.08292 | -0.47841 |
| H | +0.98864 | +1.97123 | -0.57406 |

\* E = +1.336 kcal/mol ; Conformer 018

|   |          |          |          |
|---|----------|----------|----------|
| C | +0.00000 | +0.00000 | +0.00000 |
| C | +0.00000 | +0.00000 | +1.49588 |
| C | +1.39833 | +0.00000 | +2.08464 |
| C | +1.37772 | +0.01433 | +3.60448 |
| C | +2.74307 | +0.02810 | +4.21705 |
| O | +3.49538 | -0.97806 | +3.77392 |
| C | +4.80338 | -1.04219 | +4.31335 |
| O | +3.13918 | +0.83127 | +5.01786 |
| H | +5.27254 | -1.90171 | +3.85252 |
| H | +5.35355 | -0.13572 | +4.08122 |
| H | +4.76280 | -1.16067 | +5.39167 |
| H | +0.85084 | +0.88441 | +3.98467 |
| H | +0.86131 | -0.87424 | +3.96914 |
| H | +1.94301 | -0.87617 | +1.73827 |
| H | +1.94250 | +0.87230 | +1.72030 |
| H | -0.54676 | +0.87570 | +1.85924 |
| H | -0.55133 | -0.86793 | +1.86150 |
| H | +0.59851 | -1.17617 | -0.37389 |
| H | -0.96917 | -0.08258 | -0.47808 |
| H | +0.63781 | +0.73969 | -0.47276 |

H +0.98844 -1.97113 -0.57500

\* E = +1.363 kcal/mol ; Conformer 019

C +0.00000 +0.00000 +0.00000  
C +0.00000 +0.00000 +1.49602  
C +1.40751 +0.00000 +2.07636  
C +1.39315 +0.00684 +3.59770  
C +2.76407 +0.01430 +4.19738  
O +3.49569 -1.01543 +3.77244  
C +4.80919 -1.08465 +4.29799  
O +3.18258 +0.83226 +4.97110  
H +5.25972 -1.96402 +3.85639  
H +5.37015 -0.19371 +4.03377  
H +4.78005 -1.17205 +5.37960  
H +0.87198 +0.87811 +3.98242  
H +0.87551 -0.88168 +3.95997  
H +1.95316 -0.87403 +1.72595  
H +1.94837 +0.87454 +1.71404  
H -0.54053 +0.87279 +1.86368  
H -0.53683 -0.87543 +1.86373  
H -1.31702 -0.00956 -0.38775  
H +0.36599 +0.90458 -0.47372  
H +0.37916 -0.89933 -0.47337  
H -2.19484 -0.01672 -0.60435

\* E = +1.417 kcal/mol ; Conformer 020

C +0.00000 +0.00000 +0.00000  
C +0.00000 +0.00000 +1.49759  
C +1.38807 +0.00000 +2.12240  
C +2.27829 -1.13939 +1.64063  
C +1.62290 -2.47442 +1.80502  
O +1.34668 -2.73539 +3.08229  
C +0.70815 -3.97614 +3.32517  
O +1.34784 -3.23197 +0.91334  
H +0.55760 -4.02826 +4.39562  
H -0.24229 -4.02224 +2.80256  
H +1.33343 -4.79633 +2.98664  
H +2.52812 -1.03193 +0.59021  
H +3.20643 -1.14046 +2.20916  
H +1.88806 +0.93982 +1.89310  
H +1.29170 -0.05756 +3.20448  
H -0.55099 +0.86352 +1.86742  
H -0.55139 -0.87790 +1.85196  
H +0.80180 +1.05282 -0.38386  
H +0.48342 -0.84584 -0.47673  
H -0.94207 +0.25459 -0.47120  
H +1.33336 +1.75479 -0.60137

\* E = +1.532 kcal/mol ; Conformer 021

|   |          |          |          |
|---|----------|----------|----------|
| C | +0.00000 | +0.00000 | +0.00000 |
| C | +0.00000 | +0.00000 | +1.49746 |
| C | +1.39805 | +0.00000 | +2.10877 |
| C | +2.25998 | +1.17204 | +1.65485 |
| C | +1.58244 | +2.48697 | +1.88181 |
| O | +1.32667 | +2.69470 | +3.17271 |
| C | +0.66619 | +3.91123 | +3.47387 |
| O | +1.27578 | +3.27076 | +1.02394 |
| H | +0.53546 | +3.92009 | +4.54813 |
| H | +1.26697 | +4.75707 | +3.15474 |
| H | -0.29499 | +3.95507 | +2.97117 |
| H | +3.19959 | +1.17002 | +2.20428 |
| H | +2.48574 | +1.11036 | +0.59523 |
| H | +1.31080 | +0.02059 | +3.19357 |
| H | +1.91252 | -0.92370 | +1.84648 |
| H | -0.54878 | +0.87068 | +1.85978 |
| H | -0.53628 | -0.87375 | +1.86673 |
| H | -1.31003 | -0.14444 | -0.37473 |
| H | +0.26594 | +0.93612 | -0.47843 |
| H | +0.46045 | -0.86216 | -0.47213 |
| H | -2.18582 | -0.25225 | -0.57860 |

\* E = +1.656 kcal/mol ; Conformer 022

|   |          |          |          |
|---|----------|----------|----------|
| C | +0.00000 | +0.00000 | +0.00000 |
| C | +0.00000 | +0.00000 | +1.49802 |
| C | +1.38445 | +0.00000 | +2.12259 |
| C | +2.20113 | -1.23220 | +1.76118 |
| C | +3.52522 | -1.27095 | +2.45525 |
| O | +4.24524 | -0.17602 | +2.20798 |
| C | +5.51925 | -0.13581 | +2.82496 |
| O | +3.92288 | -2.16286 | +3.15479 |
| H | +5.96408 | +0.80487 | +2.52713 |
| H | +5.41937 | -0.18674 | +3.90468 |
| H | +6.12859 | -0.96963 | +2.49047 |
| H | +1.67361 | -2.14502 | +2.02171 |
| H | +2.38919 | -1.25358 | +0.68844 |
| H | +1.92826 | +0.89085 | +1.81150 |
| H | +1.28356 | +0.05820 | +3.20589 |
| H | -0.53690 | +0.88423 | +1.85043 |
| H | -0.57168 | -0.85542 | +1.86320 |
| H | +0.29589 | -1.26596 | -0.42533 |
| H | -0.96923 | +0.13255 | -0.46714 |
| H | +0.77381 | +0.59476 | -0.47607 |
| H | +0.45702 | -2.12162 | -0.68804 |

\* E = +1.710 kcal/mol ; Conformer 023

|   |          |          |          |
|---|----------|----------|----------|
| C | +0.00000 | +0.00000 | +0.00000 |
|---|----------|----------|----------|

|   |          |          |          |
|---|----------|----------|----------|
| C | +0.00000 | +0.00000 | +1.49805 |
| C | +1.38311 | +0.00000 | +2.12530 |
| C | +2.21405 | -1.21708 | +1.74142 |
| C | +3.53194 | -1.24433 | +2.44854 |
| O | +3.38179 | -1.35447 | +3.76905 |
| C | +4.58423 | -1.37920 | +4.51646 |
| O | +4.60978 | -1.16983 | +1.92339 |
| H | +4.28796 | -1.47357 | +5.55315 |
| H | +5.19926 | -2.22192 | +4.21648 |
| H | +5.14614 | -0.46344 | +4.36118 |
| H | +1.66847 | -2.12520 | +1.99745 |
| H | +2.42190 | -1.23814 | +0.67707 |
| H | +1.91405 | +0.90443 | +1.82510 |
| H | +1.28754 | +0.03490 | +3.20851 |
| H | -0.53899 | +0.88230 | +1.85197 |
| H | -0.56889 | -0.85775 | +1.86281 |
| H | +0.29038 | -1.26900 | -0.41894 |
| H | -0.96845 | +0.13666 | -0.46746 |
| H | +0.77754 | +0.58870 | -0.47717 |
| H | +0.44625 | -2.12831 | -0.67201 |

\* E = +1.765 kcal/mol ; Conformer 024

|   |          |          |          |
|---|----------|----------|----------|
| C | +0.00000 | +0.00000 | +0.00000 |
| C | +0.00000 | +0.00000 | +1.49833 |
| C | +1.39086 | +0.00000 | +2.12614 |
| C | +2.20433 | -1.25389 | +1.84500 |
| C | +2.69156 | -1.39746 | +0.43574 |
| O | +3.22790 | -0.26848 | -0.02571 |
| C | +3.72547 | -0.33191 | -1.34989 |
| O | +2.64801 | -2.40756 | -0.21399 |
| H | +4.13047 | +0.64894 | -1.56275 |
| H | +4.49720 | -1.09091 | -1.42989 |
| H | +2.92424 | -0.57293 | -2.04219 |
| H | +3.09378 | -1.25461 | +2.47566 |
| H | +1.64280 | -2.15418 | +2.07871 |
| H | +1.94875 | +0.87172 | +1.78847 |
| H | +1.27997 | +0.09518 | +3.20548 |
| H | -0.52993 | +0.88350 | +1.85481 |
| H | -0.55758 | -0.86274 | +1.86396 |
| H | -1.29628 | +0.21233 | -0.37384 |
| H | +0.50564 | +0.83907 | -0.46664 |
| H | +0.21529 | -0.94314 | -0.48972 |
| H | -2.16639 | +0.37205 | -0.57934 |

21

\* E = +1.806 kcal/mol ; Conformer 025

|   |          |          |          |
|---|----------|----------|----------|
| C | +0.00000 | +0.00000 | +0.00000 |
| C | +0.00000 | +0.00000 | +1.49750 |
| C | +1.39746 | +0.00000 | +2.10768 |

|   |          |          |          |
|---|----------|----------|----------|
| C | +2.19597 | -1.24502 | +1.75371 |
| C | +3.53856 | -1.29100 | +2.41187 |
| O | +4.24545 | -0.18645 | +2.17385 |
| C | +5.53679 | -0.15543 | +2.75493 |
| O | +3.95958 | -2.20044 | +3.07420 |
| H | +5.96773 | +0.79561 | +2.47013 |
| H | +5.46795 | -0.23609 | +3.83520 |
| H | +6.14035 | -0.97630 | +2.38041 |
| H | +1.66739 | -2.14802 | +2.04550 |
| H | +2.35846 | -1.28641 | +0.67670 |
| H | +1.94480 | +0.88167 | +1.77919 |
| H | +1.30653 | +0.07241 | +3.19148 |
| H | -0.52864 | +0.88273 | +1.85659 |
| H | -0.55502 | -0.86340 | +1.86521 |
| H | -1.30330 | +0.17446 | -0.37814 |
| H | +0.48158 | +0.85180 | -0.46950 |
| H | +0.24422 | -0.93646 | -0.48888 |
| H | -2.17609 | +0.30202 | -0.58713 |

\* E = +1.869 kcal/mol ; Conformer 026

|   |          |          |          |
|---|----------|----------|----------|
| C | +0.00000 | +0.00000 | +0.00000 |
| C | +0.00000 | +0.00000 | +1.49812 |
| C | +1.37571 | +0.00000 | +2.14873 |
| C | +2.22161 | -1.22979 | +1.84751 |
| C | +2.80866 | -1.27338 | +0.46956 |
| O | +3.37467 | -0.11698 | +0.13734 |
| C | +3.92579 | -0.05684 | -1.16521 |
| O | +2.79966 | -2.22865 | -0.26063 |
| H | +4.35689 | +0.93119 | -1.25954 |
| H | +4.68406 | -0.82275 | -1.29327 |
| H | +3.14711 | -0.20245 | -1.90814 |
| H | +3.06491 | -1.26060 | +2.53771 |
| H | +1.65829 | -2.14884 | +1.98443 |
| H | +1.92441 | +0.89086 | +1.84806 |
| H | +1.24266 | +0.06076 | +3.22742 |
| H | -0.55088 | +0.86977 | +1.85475 |
| H | -0.55933 | -0.87269 | +1.85114 |
| H | +0.73562 | +1.09737 | -0.39347 |
| H | +0.51242 | -0.82031 | -0.49037 |
| H | -0.95696 | +0.21138 | -0.46330 |
| H | +1.20615 | +1.83489 | -0.62534 |

\* E = +1.876 kcal/mol ; Conformer 027

|   |          |          |          |
|---|----------|----------|----------|
| C | +0.00000 | +0.00000 | +0.00000 |
| C | +0.00000 | +0.00000 | +1.49746 |
| C | +1.39535 | +0.00000 | +2.11233 |
| C | +2.19840 | -1.24323 | +1.75973 |
| C | +3.54045 | -1.27781 | +2.42111 |

|   |          |          |          |
|---|----------|----------|----------|
| O | +3.44107 | -1.20513 | +3.74821 |
| C | +4.67008 | -1.23662 | +4.45154 |
| O | +4.59567 | -1.36304 | +1.85350 |
| H | +4.41353 | -1.16966 | +5.50083 |
| H | +5.20042 | -2.16114 | +4.24569 |
| H | +5.29658 | -0.40062 | +4.15679 |
| H | +1.64822 | -2.13026 | +2.07609 |
| H | +2.37183 | -1.31766 | +0.69128 |
| H | +1.93695 | +0.88603 | +1.77961 |
| H | +1.30948 | +0.06997 | +3.19486 |
| H | -0.53115 | +0.88122 | +1.85647 |
| H | -0.55281 | -0.86512 | +1.86530 |
| H | -1.30804 | +0.15137 | -0.37706 |
| H | +0.46650 | +0.85987 | -0.46981 |
| H | +0.26147 | -0.93179 | -0.48863 |
| H | -2.18313 | +0.26150 | -0.58358 |

\* E = +1.894 kcal/mol ; Conformer 028

|   |          |          |          |
|---|----------|----------|----------|
| C | +0.00000 | +0.00000 | +0.00000 |
| C | +0.00000 | +0.00000 | +1.49852 |
| C | +1.38433 | +0.00000 | +2.12562 |
| C | +2.22578 | -1.21880 | +1.79257 |
| C | +1.68855 | -2.53325 | +2.27484 |
| O | +0.94745 | -2.41218 | +3.37669 |
| C | +0.45526 | -3.62896 | +3.90913 |
| O | +1.92157 | -3.59552 | +1.76607 |
| H | -0.12355 | -3.35843 | +4.78282 |
| H | -0.16685 | -4.13705 | +3.17901 |
| H | +1.27777 | -4.28256 | +4.18231 |
| H | +2.39109 | -1.32652 | +0.72435 |
| H | +3.21278 | -1.11739 | +2.24575 |
| H | +1.92533 | +0.88580 | +1.79160 |
| H | +1.28593 | +0.07983 | +3.20580 |
| H | -0.53594 | +0.88444 | +1.85171 |
| H | -0.57062 | -0.85339 | +1.86858 |
| H | +0.29648 | -1.26288 | -0.42443 |
| H | -0.97009 | +0.13215 | -0.46565 |
| H | +0.77050 | +0.59874 | -0.47670 |
| H | +0.45769 | -2.12247 | -0.68135 |

\* E = +1.973 kcal/mol ; Conformer 029

|   |          |          |          |
|---|----------|----------|----------|
| C | +0.00000 | +0.00000 | +0.00000 |
| C | +0.00000 | +0.00000 | +1.49708 |
| C | +1.38523 | +0.00000 | +2.12384 |
| C | +2.17757 | -1.26307 | +1.81990 |
| C | +3.49807 | -1.30981 | +2.52205 |
| O | +4.22710 | -0.22150 | +2.27988 |
| C | +5.49958 | -0.19208 | +2.90108 |



|   |          |          |          |
|---|----------|----------|----------|
| O | +3.88420 | -2.20798 | +3.22034 |
| H | +5.95166 | +0.74617 | +2.60684 |
| H | +5.39550 | -0.24493 | +3.98027 |
| H | +6.10381 | -1.02946 | +2.56625 |
| H | +1.62948 | -2.15306 | +2.11570 |
| H | +2.37848 | -1.33303 | +0.75131 |
| H | +1.94590 | +0.86705 | +1.77975 |
| H | +1.28129 | +0.10096 | +3.20366 |
| H | -0.54677 | +0.87288 | +1.85271 |
| H | -0.55895 | -0.86886 | +1.85919 |
| H | +0.65763 | +1.14487 | -0.37566 |
| H | +0.58457 | -0.77118 | -0.48930 |
| H | -0.96689 | +0.13782 | -0.47006 |
| H | +1.08412 | +1.91913 | -0.58394 |

\* E = +1.992 kcal/mol ; Conformer 030

|   |          |          |          |
|---|----------|----------|----------|
| C | +0.00000 | +0.00000 | +0.00000 |
| C | +0.00000 | +0.00000 | +1.49723 |
| C | +1.38456 | +0.00000 | +2.12514 |
| C | +2.16830 | -1.27288 | +1.84198 |
| C | +3.50411 | -1.30919 | +2.51706 |
| O | +3.40655 | -1.08171 | +3.82657 |
| C | +4.62934 | -1.11432 | +4.54059 |
| O | +4.55288 | -1.52642 | +1.97333 |
| H | +4.37589 | -0.91080 | +5.57291 |
| H | +5.09678 | -2.08955 | +4.44654 |
| H | +5.31103 | -0.36110 | +4.15832 |
| H | +1.59956 | -2.13406 | +2.19612 |
| H | +2.35473 | -1.41045 | +0.78225 |
| H | +1.94497 | +0.86064 | +1.75903 |
| H | +1.29166 | +0.11896 | +3.20205 |
| H | -0.54795 | +0.87255 | +1.85204 |
| H | -0.55775 | -0.86916 | +1.86115 |
| H | +0.63384 | +1.15837 | -0.37040 |
| H | +0.60195 | -0.75703 | -0.48995 |
| H | -0.96896 | +0.12003 | -0.47064 |
| H | +1.04388 | +1.94408 | -0.57117 |

\* E = +2.148 kcal/mol ; Conformer 031

|   |          |          |          |
|---|----------|----------|----------|
| C | +0.00000 | +0.00000 | +0.00000 |
| C | +0.00000 | +0.00000 | +1.49707 |
| C | +1.38089 | +0.00000 | +2.13512 |
| C | +2.22463 | +1.20987 | +1.76997 |
| C | +2.98889 | +1.03574 | +0.49247 |
| O | +3.18699 | +2.19571 | -0.13199 |
| C | +3.96140 | +2.12034 | -1.31630 |
| O | +3.41246 | -0.00800 | +0.07656 |
| H | +3.48123 | +1.47126 | -2.04184 |

|   |          |          |          |
|---|----------|----------|----------|
| H | +4.02589 | +3.13283 | -1.69307 |
| H | +4.95031 | +1.72953 | -1.09797 |
| H | +1.63283 | +2.12103 | +1.71098 |
| H | +2.98119 | +1.38459 | +2.53579 |
| H | +1.26104 | -0.03254 | +3.21601 |
| H | +1.92352 | -0.89865 | +1.84528 |
| H | -0.55545 | +0.87326 | +1.85555 |
| H | -0.55236 | -0.86918 | +1.85378 |
| H | +0.65106 | -1.15174 | -0.38132 |
| H | -0.97019 | -0.13128 | -0.46548 |
| H | +0.58064 | +0.77559 | -0.48846 |
| H | +1.05756 | -1.93061 | -0.58982 |

\* E = +2.599 kcal/mol ; Conformer 032

|   |          |          |          |
|---|----------|----------|----------|
| C | +0.00000 | +0.00000 | +0.00000 |
| C | +0.00000 | +0.00000 | +1.49706 |
| C | +1.37112 | +0.00000 | +2.15533 |
| C | +2.17336 | +1.27939 | +1.98231 |
| C | +2.95724 | +1.46448 | +0.71665 |
| O | +3.13092 | +0.33837 | +0.02826 |
| C | +3.87890 | +0.47683 | -1.16676 |
| O | +3.42939 | +2.51357 | +0.37139 |
| H | +3.93045 | -0.51303 | -1.60185 |
| H | +3.38194 | +1.16756 | -1.84112 |
| H | +4.87379 | +0.85254 | -0.94989 |
| H | +1.54434 | +2.16219 | +2.08114 |
| H | +2.91585 | +1.35894 | +2.77694 |
| H | +1.22681 | -0.15568 | +3.22326 |
| H | +1.95308 | -0.84667 | +1.79521 |
| H | -0.57851 | +0.85101 | +1.86247 |
| H | -0.53889 | -0.88775 | +1.83962 |
| H | +0.40780 | +1.23270 | -0.42952 |
| H | +0.72016 | -0.65827 | -0.47230 |
| H | -0.98090 | -0.04568 | -0.46016 |
| H | +0.63565 | +2.06910 | -0.71011 |

\* E = +7.839 kcal/mol ; Conformer 033

|   |          |          |          |
|---|----------|----------|----------|
| C | +0.00000 | +0.00000 | +0.00000 |
| C | +0.00000 | +0.00000 | +1.49748 |
| C | +1.38469 | +0.00000 | +2.12545 |
| C | +2.25051 | -1.17448 | +1.71366 |
| C | +1.69630 | -2.48903 | +2.19553 |
| O | +2.22205 | -3.61371 | +1.69919 |
| C | +3.20854 | -3.57983 | +0.69360 |
| O | +0.83715 | -2.57075 | +3.02581 |
| H | +3.52318 | -4.60693 | +0.55632 |
| H | +2.80190 | -3.20424 | -0.24287 |
| H | +4.06745 | -2.98240 | +0.99028 |

|   |          |          |          |
|---|----------|----------|----------|
| H | +2.38852 | -1.19802 | +0.63488 |
| H | +3.25048 | -1.07210 | +2.13993 |
| H | +1.90547 | +0.91789 | +1.85159 |
| H | +1.28058 | -0.00202 | +3.20772 |
| H | -0.53347 | +0.88746 | +1.84714 |
| H | -0.56643 | -0.85232 | +1.86948 |
| H | +0.32928 | -1.25823 | -0.42058 |
| H | -0.97289 | +0.10070 | -0.46746 |
| H | +0.75591 | +0.61299 | -0.48319 |
| H | +0.52284 | -2.11317 | -0.67513 |

\* E = +8.044 kcal/mol ; Conformer 034

|   |          |          |          |
|---|----------|----------|----------|
| C | +0.00000 | +0.00000 | +0.00000 |
| C | +0.00000 | +0.00000 | +1.49525 |
| C | +1.40217 | +0.00000 | +2.07687 |
| C | +1.41776 | -0.00025 | +3.59103 |
| C | +0.97039 | +1.31532 | +4.17106 |
| O | +0.80964 | +1.39069 | +5.49803 |
| C | +1.01543 | +0.27092 | +6.32777 |
| O | +0.77426 | +2.29421 | +3.51110 |
| H | +0.90544 | +0.63279 | +7.34242 |
| H | +0.27206 | -0.50203 | +6.14586 |
| H | +2.01274 | -0.14484 | +6.20637 |
| H | +0.79375 | -0.80423 | +3.98242 |
| H | +2.42397 | -0.19701 | +3.96457 |
| H | +1.93871 | -0.87835 | +1.72020 |
| H | +1.94007 | +0.87609 | +1.71900 |
| H | -0.53414 | +0.88117 | +1.85726 |
| H | -0.54917 | -0.87065 | +1.85976 |
| H | +0.61515 | -1.16906 | -0.37315 |
| H | -0.96785 | -0.09518 | -0.47843 |
| H | +0.62700 | +0.75029 | -0.47018 |
| H | +1.01711 | -1.96073 | -0.56748 |

\* E = +8.150 kcal/mol ; Conformer 035

|   |          |          |          |
|---|----------|----------|----------|
| C | +0.00000 | +0.00000 | +0.00000 |
| C | +0.00000 | +0.00000 | +1.49750 |
| C | +1.37688 | +0.00000 | +2.14369 |
| C | +2.22706 | +1.20289 | +1.77438 |
| C | +3.01434 | +1.00061 | +0.50457 |
| O | +3.60479 | +2.06779 | -0.04171 |
| C | +3.39363 | +3.36452 | +0.46719 |
| O | +3.17782 | -0.07092 | -0.00466 |
| H | +4.04746 | +4.01301 | -0.10262 |
| H | +2.36289 | +3.67979 | +0.31914 |
| H | +3.65520 | +3.43357 | +1.52050 |
| H | +1.61322 | +2.09919 | +1.69795 |
| H | +2.96045 | +1.40698 | +2.55708 |

|   |          |          |          |
|---|----------|----------|----------|
| H | +1.24844 | -0.01971 | +3.22413 |
| H | +1.91627 | -0.90311 | +1.86606 |
| H | -0.57327 | +0.85663 | +1.85985 |
| H | -0.54204 | -0.88276 | +1.84685 |
| H | +0.39204 | +1.24580 | -0.40953 |
| H | +0.73340 | -0.63701 | -0.47998 |
| H | -0.98025 | -0.04557 | -0.46123 |
| H | +0.61209 | +2.09752 | -0.65246 |

\* E = +8.266 kcal/mol ; Conformer 036

|   |          |          |          |
|---|----------|----------|----------|
| C | +0.00000 | +0.00000 | +0.00000 |
| C | +0.00000 | +0.00000 | +1.49795 |
| C | +1.38170 | +0.00000 | +2.12738 |
| C | +2.20052 | -1.22001 | +1.76579 |
| C | +3.51521 | -1.24754 | +2.49412 |
| O | +4.32356 | -2.29389 | +2.28036 |
| C | +3.94911 | -3.34324 | +1.41785 |
| O | +3.87166 | -0.38566 | +3.24373 |
| H | +4.78621 | -4.03004 | +1.41014 |
| H | +3.06653 | -3.86477 | +1.78100 |
| H | +3.77117 | -2.98940 | +0.40519 |
| H | +1.64833 | -2.13464 | +1.98909 |
| H | +2.39795 | -1.25760 | +0.69425 |
| H | +1.92693 | +0.89412 | +1.82837 |
| H | +1.29447 | +0.05612 | +3.20983 |
| H | -0.53809 | +0.88470 | +1.84699 |
| H | -0.57593 | -0.85373 | +1.86162 |
| H | +0.32339 | -1.26064 | -0.42545 |
| H | -0.97051 | +0.11213 | -0.46993 |
| H | +0.76297 | +0.60891 | -0.47586 |
| H | +0.50680 | -2.11213 | -0.68854 |

\* E = +8.430 kcal/mol ; Conformer 037

|   |          |          |          |
|---|----------|----------|----------|
| C | +0.00000 | +0.00000 | +0.00000 |
| C | +0.00000 | +0.00000 | +1.49584 |
| C | +1.41034 | +0.00000 | +2.07135 |
| C | +1.42669 | +0.00625 | +3.58661 |
| C | +0.99265 | +1.33010 | +4.15860 |
| O | +0.81823 | +1.41117 | +5.48338 |
| C | +0.99066 | +0.28887 | +6.31726 |
| O | +0.82124 | +2.31005 | +3.49376 |
| H | +0.88102 | +0.65575 | +7.33015 |
| H | +0.23031 | -0.46632 | +6.13100 |
| H | +1.97877 | -0.15083 | +6.20506 |
| H | +0.79529 | -0.79005 | +3.98138 |
| H | +2.43156 | -0.19679 | +3.96087 |
| H | +1.94564 | -0.88129 | +1.71969 |
| H | +1.94932 | +0.87305 | +1.70939 |

|   |          |          |          |
|---|----------|----------|----------|
| H | -0.52919 | +0.87736 | +1.86304 |
| H | -0.53423 | -0.87864 | +1.86223 |
| H | -1.31650 | -0.03932 | -0.38908 |
| H | +0.34548 | +0.91396 | -0.47047 |
| H | +0.39756 | -0.89035 | -0.47635 |
| H | -2.19296 | -0.07079 | -0.60850 |

\* E = +8.483 kcal/mol ; Conformer 038

|   |          |          |          |
|---|----------|----------|----------|
| C | +0.00000 | +0.00000 | +0.00000 |
| C | +0.00000 | +0.00000 | +1.49617 |
| C | +1.40752 | +0.00000 | +2.07512 |
| C | +1.40050 | -0.00009 | +3.58813 |
| C | +2.79245 | +0.00016 | +4.15789 |
| O | +2.92193 | -0.00019 | +5.49124 |
| C | +1.79561 | -0.00103 | +6.33676 |
| O | +3.77883 | +0.00069 | +3.48151 |
| H | +2.18594 | -0.00104 | +7.34677 |
| H | +1.18491 | +0.88752 | +6.19398 |
| H | +1.18594 | -0.89022 | +6.19357 |
| H | +0.86290 | +0.86934 | +3.97025 |
| H | +0.86321 | -0.86974 | +3.97018 |
| H | +1.96014 | -0.86801 | +1.72089 |
| H | +1.96012 | +0.86808 | +1.72101 |
| H | -0.54169 | +0.87402 | +1.86111 |
| H | -0.54171 | -0.87401 | +1.86112 |
| H | -1.31921 | -0.00000 | -0.38593 |
| H | +0.37305 | +0.90180 | -0.47319 |
| H | +0.37305 | -0.90179 | -0.47319 |
| H | -2.19756 | +0.00003 | -0.59702 |

\* E = +8.571 kcal/mol ; Conformer 039

|   |          |          |          |
|---|----------|----------|----------|
| C | +0.00000 | +0.00000 | +0.00000 |
| C | +0.00000 | +0.00000 | +1.49609 |
| C | +1.39935 | +0.00000 | +2.08132 |
| C | +1.38959 | -0.02119 | +3.59321 |
| C | +2.77847 | +0.02017 | +4.16863 |
| O | +2.90420 | -0.03280 | +5.50167 |
| C | +1.77843 | -0.14628 | +6.33997 |
| O | +3.76542 | +0.10338 | +3.49849 |
| H | +2.16305 | -0.13706 | +7.35217 |
| H | +1.09535 | +0.69057 | +6.21393 |
| H | +1.24660 | -1.08025 | +6.17279 |
| H | +0.82569 | +0.82710 | +3.98624 |
| H | +0.87761 | -0.91107 | +3.96246 |
| H | +1.95625 | -0.86013 | +1.71411 |
| H | +1.94807 | +0.87631 | +1.74077 |
| H | -0.54711 | +0.87640 | +1.85879 |
| H | -0.55577 | -0.86707 | +1.85840 |

|   |          |          |          |
|---|----------|----------|----------|
| H | +0.56589 | -1.19254 | -0.36885 |
| H | -0.97076 | -0.05838 | -0.47841 |
| H | +0.65822 | +0.72142 | -0.47254 |
| H | +0.93018 | -2.00161 | -0.56239 |

\* E = +8.613 kcal/mol ; Conformer 040

|   |          |          |          |
|---|----------|----------|----------|
| C | +0.00000 | +0.00000 | +0.00000 |
| C | +0.00000 | +0.00000 | +1.49591 |
| C | +1.40154 | +0.00000 | +2.07965 |
| C | +1.41990 | -0.10147 | +3.59061 |
| C | +0.91450 | +1.14827 | +4.26129 |
| O | +0.75839 | +1.12283 | +5.59142 |
| C | +1.02350 | -0.04000 | +6.34075 |
| O | +0.66817 | +2.15989 | +3.67232 |
| H | +0.89955 | +0.24416 | +7.37830 |
| H | +0.31935 | -0.83521 | +6.10605 |
| H | +2.04005 | -0.39551 | +6.19039 |
| H | +0.83328 | -0.95765 | +3.92550 |
| H | +2.43487 | -0.27788 | +3.95038 |
| H | +1.96319 | -0.84005 | +1.67072 |
| H | +1.91537 | +0.91003 | +1.77623 |
| H | -0.54421 | +0.86694 | +1.86618 |
| H | -0.53931 | -0.88404 | +1.85438 |
| H | +0.64054 | +1.15130 | -0.38589 |
| H | +0.61068 | -0.76232 | -0.47385 |
| H | -0.96633 | +0.11522 | -0.47694 |
| H | +1.06402 | +1.92095 | -0.61182 |

\* E = +8.785 kcal/mol ; Conformer 041

|   |          |          |          |
|---|----------|----------|----------|
| C | +0.00000 | +0.00000 | +0.00000 |
| C | +0.00000 | +0.00000 | +1.49690 |
| C | +1.38644 | +0.00000 | +2.12346 |
| C | +2.20228 | -1.24576 | +1.83939 |
| C | +1.65184 | -2.46475 | +2.53019 |
| O | +2.20823 | -3.64913 | +2.24577 |
| C | +3.25658 | -3.76325 | +1.31177 |
| O | +0.76275 | -2.42454 | +3.33030 |
| H | +3.57058 | -4.79898 | +1.34730 |
| H | +2.91994 | -3.53086 | +0.30382 |
| H | +4.10033 | -3.12833 | +1.57096 |
| H | +2.28199 | -1.43482 | +0.76973 |
| H | +3.22806 | -1.10935 | +2.18604 |
| H | +1.94193 | +0.86496 | +1.76259 |
| H | +1.28502 | +0.10502 | +3.20094 |
| H | -0.53930 | +0.87810 | +1.85042 |
| H | -0.55739 | -0.86191 | +1.87002 |
| H | +0.67110 | +1.13454 | -0.38006 |
| H | +0.57407 | -0.77758 | -0.49318 |

|   |          |          |          |
|---|----------|----------|----------|
| H | -0.96561 | +0.14623 | -0.47025 |
| H | +1.11252 | +1.90218 | -0.58975 |

\* E = +8.981 kcal/mol ; Conformer 042

|   |          |          |          |
|---|----------|----------|----------|
| C | +0.00000 | +0.00000 | +0.00000 |
| C | +0.00000 | +0.00000 | +1.49795 |
| C | +1.39476 | +0.00000 | +2.11253 |
| C | +2.19322 | -1.23961 | +1.77293 |
| C | +3.52929 | -1.25151 | +2.46315 |
| O | +4.33191 | -2.30343 | +2.25286 |
| C | +3.94209 | -3.36675 | +1.41592 |
| O | +3.90514 | -0.37348 | +3.18316 |
| H | +4.76894 | -4.06586 | +1.42390 |
| H | +3.05230 | -3.86776 | +1.79032 |
| H | +3.77135 | -3.03329 | +0.39484 |
| H | +1.64244 | -2.13905 | +2.05507 |
| H | +2.35596 | -1.31817 | +0.69736 |
| H | +1.94745 | +0.87948 | +1.78690 |
| H | +1.31728 | +0.08149 | +3.19464 |
| H | -0.52931 | +0.88275 | +1.85506 |
| H | -0.55887 | -0.86207 | +1.86466 |
| H | -1.30509 | +0.15508 | -0.37864 |
| H | +0.47057 | +0.85789 | -0.46949 |
| H | +0.25655 | -0.93308 | -0.48989 |
| H | -2.18078 | +0.26637 | -0.58667 |

\* E = +9.067 kcal/mol ; Conformer 043

|   |          |          |          |
|---|----------|----------|----------|
| C | +0.00000 | +0.00000 | +0.00000 |
| C | +0.00000 | +0.00000 | +1.49796 |
| C | +1.39822 | +0.00000 | +2.10962 |
| C | +2.22046 | -1.22900 | +1.77699 |
| C | +1.69804 | -2.46972 | +2.45083 |
| O | +2.25236 | -3.64228 | +2.11745 |
| C | +3.27132 | -3.72420 | +1.14832 |
| O | +0.83421 | -2.45628 | +3.27872 |
| H | +3.59278 | -4.75825 | +1.14631 |
| H | +2.90162 | -3.46756 | +0.15800 |
| H | +4.11889 | -3.09042 | +1.39784 |
| H | +2.26986 | -1.38747 | +0.70019 |
| H | +3.25336 | -1.09221 | +2.10167 |
| H | +1.94145 | +0.88010 | +1.76630 |
| H | +1.30744 | +0.07569 | +3.19102 |
| H | -0.52136 | +0.88781 | +1.85462 |
| H | -0.55235 | -0.85720 | +1.87687 |
| H | -1.30009 | +0.17477 | -0.38024 |
| H | +0.48252 | +0.84918 | -0.47427 |
| H | +0.23742 | -0.93736 | -0.49170 |
| H | -2.17232 | +0.30188 | -0.59836 |

\* E = +9.209 kcal/mol ; Conformer 044

|   |          |          |          |
|---|----------|----------|----------|
| C | +0.00000 | +0.00000 | +0.00000 |
| C | +0.00000 | +0.00000 | +1.49763 |
| C | +1.38177 | +0.00000 | +2.13038 |
| C | +2.19161 | -1.23655 | +1.80466 |
| C | +3.49326 | -1.26731 | +2.55835 |
| O | +4.32375 | -2.29338 | +2.32764 |
| C | +4.00820 | -3.29639 | +1.39112 |
| O | +3.81559 | -0.43154 | +3.35059 |
| H | +4.82317 | -4.00800 | +1.43620 |
| H | +3.08038 | -3.80559 | +1.64142 |
| H | +3.94471 | -2.89613 | +0.38167 |
| H | +1.62817 | -2.13950 | +2.05015 |
| H | +2.40588 | -1.30165 | +0.73802 |
| H | +1.93528 | +0.88193 | +1.81277 |
| H | +1.29035 | +0.07857 | +3.21089 |
| H | -0.54755 | +0.87206 | +1.85290 |
| H | -0.56223 | -0.86856 | +1.85727 |
| H | +0.69209 | +1.12301 | -0.38023 |
| H | +0.56243 | -0.78829 | -0.48890 |
| H | -0.96200 | +0.16394 | -0.47175 |
| H | +1.14533 | +1.87941 | -0.59802 |

\* E = +9.603 kcal/mol ; Conformer 045

|   |          |          |          |
|---|----------|----------|----------|
| C | +0.00000 | +0.00000 | +0.00000 |
| C | +0.00000 | +0.00000 | +1.49687 |
| C | +1.39031 | +0.00000 | +2.12709 |
| C | +2.23428 | -1.19965 | +1.73795 |
| C | +2.97838 | -1.00123 | +0.44290 |
| O | +3.55913 | -2.07177 | -0.11368 |
| C | +3.45923 | -3.35123 | +0.46758 |
| O | +3.10668 | +0.06261 | -0.08936 |
| H | +4.11162 | -3.98989 | -0.11481 |
| H | +3.79330 | -3.35305 | +1.50227 |
| H | +2.44393 | -3.73730 | +0.40956 |
| H | +2.98996 | -1.39856 | +2.50025 |
| H | +1.62248 | -2.10022 | +1.68631 |
| H | +1.92391 | +0.90561 | +1.84774 |
| H | +1.27429 | +0.01131 | +3.20961 |
| H | -0.53457 | +0.87900 | +1.85640 |
| H | -0.55399 | -0.86669 | +1.86185 |
| H | -1.31640 | +0.12805 | -0.36915 |
| H | +0.46517 | +0.85672 | -0.47282 |
| H | +0.27236 | -0.93076 | -0.48689 |
| H | -2.19456 | +0.22061 | -0.56737 |

\* E = +9.993 kcal/mol ; Conformer 046



|   |          |          |          |
|---|----------|----------|----------|
| C | +0.00000 | +0.00000 | +0.00000 |
| C | +0.00000 | +0.00000 | +1.49745 |
| C | +1.39037 | +0.00000 | +2.11897 |
| C | +2.29658 | +1.13742 | +1.64491 |
| C | +1.66412 | +2.47938 | +1.88510 |
| O | +1.84907 | +3.08338 | +3.06559 |
| C | +2.74868 | +2.57385 | +4.02330 |
| O | +0.95127 | +3.00452 | +1.07786 |
| H | +2.63179 | +3.20084 | +4.89857 |
| H | +2.51907 | +1.54582 | +4.29107 |
| H | +3.77658 | +2.64265 | +3.67451 |
| H | +3.26915 | +1.05455 | +2.12201 |
| H | +2.44945 | +1.05977 | +0.57297 |
| H | +1.29218 | +0.02777 | +3.20399 |
| H | +1.88984 | -0.93668 | +1.87608 |
| H | -0.55615 | +0.87530 | +1.84416 |
| H | -0.53749 | -0.87098 | +1.86933 |
| H | +0.89041 | -0.97986 | -0.39089 |
| H | -0.91798 | -0.33147 | -0.47062 |
| H | +0.40846 | +0.88869 | -0.46716 |
| H | +1.48730 | -1.62554 | -0.61319 |

\* E = +10.004 kcal/mol ; Conformer 047

|   |          |          |          |
|---|----------|----------|----------|
| C | +0.00000 | +0.00000 | +0.00000 |
| C | +0.00000 | +0.00000 | +1.49583 |
| C | +1.40002 | +0.00000 | +2.08018 |
| C | +1.38861 | -0.01458 | +3.60464 |
| C | +2.78881 | +0.06965 | +4.14691 |
| O | +3.46994 | -1.06364 | +4.35890 |
| C | +2.86924 | -2.32840 | +4.20111 |
| O | +3.33411 | +1.11571 | +4.34852 |
| H | +3.66654 | -3.05013 | +4.32894 |
| H | +2.11031 | -2.50268 | +4.96060 |
| H | +2.43593 | -2.45255 | +3.21183 |
| H | +0.86958 | +0.86586 | +3.97183 |
| H | +0.85878 | -0.89186 | +3.96844 |
| H | +1.94882 | -0.86049 | +1.69556 |
| H | +1.93949 | +0.88480 | +1.74440 |
| H | -0.54196 | +0.87673 | +1.86275 |
| H | -0.55295 | -0.86723 | +1.86091 |
| H | +0.58760 | -1.18393 | -0.36400 |
| H | -0.96953 | -0.07606 | -0.47806 |
| H | +0.64527 | +0.73238 | -0.47346 |
| H | +0.97104 | -1.98729 | -0.54625 |

\* E = +10.085 kcal/mol ; Conformer 048

|   |          |          |          |
|---|----------|----------|----------|
| C | +0.00000 | +0.00000 | +0.00000 |
| C | +0.00000 | +0.00000 | +1.49557 |

|   |          |          |          |
|---|----------|----------|----------|
| C | +1.40445 | +0.00000 | +2.07191 |
| C | +1.43623 | -0.01602 | +3.60013 |
| C | +0.81483 | +1.22703 | +4.17351 |
| O | +1.58033 | +2.31494 | +4.33519 |
| C | +2.97725 | +2.27147 | +4.15520 |
| O | -0.35035 | +1.30190 | +4.43924 |
| H | +3.31956 | +3.29282 | +4.26756 |
| H | +3.45345 | +1.65445 | +4.91393 |
| H | +3.25066 | +1.91341 | +3.16606 |
| H | +0.84265 | -0.84861 | +3.96586 |
| H | +2.45567 | -0.15286 | +3.95033 |
| H | +1.93903 | -0.87815 | +1.71199 |
| H | +1.94848 | +0.86654 | +1.69230 |
| H | -0.55325 | +0.86664 | +1.86455 |
| H | -0.54338 | -0.87015 | +1.86556 |
| H | +0.62497 | -1.16251 | -0.37588 |
| H | -0.96820 | -0.10241 | -0.47577 |
| H | +0.61996 | +0.75376 | -0.47497 |
| H | +1.03766 | -1.94771 | -0.57374 |

\* E = +10.093 kcal/mol ; Conformer 049

|   |          |          |          |
|---|----------|----------|----------|
| C | +0.00000 | +0.00000 | +0.00000 |
| C | +0.00000 | +0.00000 | +1.49565 |
| C | +1.40526 | +0.00000 | +2.07013 |
| C | +1.44291 | +0.06800 | +3.59634 |
| C | +0.74641 | -1.10975 | +4.22073 |
| O | +1.43812 | -2.23913 | +4.41946 |
| C | +2.83148 | -2.30024 | +4.21762 |
| O | -0.41783 | -1.09311 | +4.50036 |
| H | +3.10418 | -3.33774 | +4.36628 |
| H | +3.11155 | -2.00217 | +3.21084 |
| H | +3.36186 | -1.68852 | +4.94407 |
| H | +2.47043 | +0.15409 | +3.93967 |
| H | +0.90277 | +0.94799 | +3.93293 |
| H | +1.93402 | -0.88486 | +1.71437 |
| H | +1.95373 | +0.85882 | +1.68337 |
| H | -0.53850 | +0.87809 | +1.86415 |
| H | -0.55840 | -0.85794 | +1.86718 |
| H | +0.62890 | -1.16007 | -0.37359 |
| H | -0.96740 | -0.10788 | -0.47608 |
| H | +0.61886 | +0.75366 | -0.47674 |
| H | +1.04734 | -1.94233 | -0.57244 |

\* E = +10.169 kcal/mol ; Conformer 050

|   |          |          |          |
|---|----------|----------|----------|
| C | +0.00000 | +0.00000 | +0.00000 |
| C | +0.00000 | +0.00000 | +1.49817 |
| C | +1.38705 | +0.00000 | +2.12367 |
| C | +2.25593 | -1.16521 | +1.66107 |

|   |          |          |          |
|---|----------|----------|----------|
| C | +3.55282 | -1.18109 | +2.42222 |
| O | +4.59157 | -0.48804 | +1.94058 |
| C | +4.54250 | +0.13873 | +0.67823 |
| O | +3.67280 | -1.74853 | +3.46934 |
| H | +5.45667 | +0.71427 | +0.60113 |
| H | +4.51877 | -0.59534 | -0.12419 |
| H | +3.69212 | +0.80950 | +0.58571 |
| H | +1.75816 | -2.10407 | +1.88771 |
| H | +2.41908 | -1.11816 | +0.58752 |
| H | +1.88027 | +0.94468 | +1.89273 |
| H | +1.29436 | -0.04713 | +3.20679 |
| H | -0.54538 | +0.86813 | +1.86404 |
| H | -0.55096 | -0.87589 | +1.85407 |
| H | +0.91371 | +0.95280 | -0.38846 |
| H | +0.40336 | -0.88416 | -0.48149 |
| H | -0.90957 | +0.34418 | -0.47754 |
| H | +1.54070 | +1.57039 | -0.61524 |

\* E = +10.226 kcal/mol ; Conformer 051

|   |          |          |          |
|---|----------|----------|----------|
| C | +0.00000 | +0.00000 | +0.00000 |
| C | +0.00000 | +0.00000 | +1.49610 |
| C | +1.40711 | +0.00000 | +2.07678 |
| C | +1.39546 | -0.02143 | +3.60250 |
| C | +2.79845 | -0.09192 | +4.13896 |
| O | +3.45473 | +1.04915 | +4.38760 |
| C | +2.82399 | +2.30387 | +4.27783 |
| O | +3.36873 | -1.13114 | +4.30225 |
| H | +3.60386 | +3.03936 | +4.43210 |
| H | +2.38645 | +2.45426 | +3.29382 |
| H | +2.06167 | +2.43186 | +5.04309 |
| H | +0.84820 | +0.83580 | +3.98721 |
| H | +0.89386 | -0.92084 | +3.94684 |
| H | +1.95488 | -0.87127 | +1.72130 |
| H | +1.94931 | +0.87447 | +1.71458 |
| H | -0.54144 | +0.87237 | +1.86447 |
| H | -0.53497 | -0.87583 | +1.86427 |
| H | -1.31754 | -0.00026 | -0.38456 |
| H | +0.37117 | +0.90197 | -0.47470 |
| H | +0.37270 | -0.90198 | -0.47289 |
| H | -2.19618 | +0.00063 | -0.59750 |

\* E = +10.242 kcal/mol ; Conformer 052

|   |          |          |          |
|---|----------|----------|----------|
| C | +0.00000 | +0.00000 | +0.00000 |
| C | +0.00000 | +0.00000 | +1.49706 |
| C | +1.40003 | +0.00000 | +2.10358 |
| C | +2.27635 | -1.17308 | +1.66019 |
| C | +1.61698 | -2.49247 | +1.95016 |
| O | +1.79797 | -3.06067 | +3.14876 |

|   |          |          |          |
|---|----------|----------|----------|
| C | +2.71571 | -2.53933 | +4.08250 |
| O | +0.88872 | -3.02873 | +1.16462 |
| H | +2.59167 | -3.13363 | +4.97932 |
| H | +3.73923 | -2.64279 | +3.72930 |
| H | +2.51083 | -1.49800 | +4.31696 |
| H | +2.41307 | -1.13749 | +0.58378 |
| H | +3.25669 | -1.09772 | +2.12269 |
| H | +1.91545 | +0.91848 | +1.82464 |
| H | +1.31300 | +0.01336 | +3.19042 |
| H | -0.52307 | +0.88187 | +1.86699 |
| H | -0.55458 | -0.86653 | +1.85411 |
| H | -1.30122 | +0.20732 | -0.37216 |
| H | +0.49741 | +0.84073 | -0.47413 |
| H | +0.21871 | -0.95134 | -0.47052 |
| H | -2.17002 | +0.36319 | -0.57486 |

\* E = +10.352 kcal/mol ; Conformer 053

|   |          |          |          |
|---|----------|----------|----------|
| C | +0.00000 | +0.00000 | +0.00000 |
| C | +0.00000 | +0.00000 | +1.49609 |
| C | +1.39851 | +0.00000 | +2.08432 |
| C | +1.38068 | -0.00571 | +3.60903 |
| C | +2.77933 | -0.06238 | +4.15858 |
| O | +3.43334 | +1.08602 | +4.38076 |
| C | +2.80037 | +2.33641 | +4.24089 |
| O | +3.34841 | -1.09579 | +4.35729 |
| H | +3.57856 | +3.07700 | +4.37867 |
| H | +2.36313 | +2.46325 | +3.25351 |
| H | +2.03714 | +2.48072 | +5.00243 |
| H | +0.82778 | +0.85326 | +3.98260 |
| H | +0.88126 | -0.90334 | +3.96106 |
| H | +1.94299 | -0.87667 | +1.73690 |
| H | +1.94561 | +0.86908 | +1.71519 |
| H | -0.54733 | +0.87497 | +1.86120 |
| H | -0.54861 | -0.86876 | +1.86252 |
| H | +0.59948 | -1.17526 | -0.37380 |
| H | -0.96967 | -0.08392 | -0.47648 |
| H | +0.63581 | +0.74074 | -0.47380 |
| H | +0.98993 | -1.96949 | -0.57509 |

\* E = +10.374 kcal/mol ; Conformer 054

|   |          |          |          |
|---|----------|----------|----------|
| C | +0.00000 | +0.00000 | +0.00000 |
| C | +0.00000 | +0.00000 | +1.49777 |
| C | +1.38197 | +0.00000 | +2.12676 |
| C | +2.19260 | +1.24972 | +1.79588 |
| C | +3.47766 | +1.25440 | +2.57635 |
| O | +4.57397 | +0.71800 | +2.02357 |
| C | +4.57861 | +0.25294 | +0.69397 |
| O | +3.54515 | +1.67460 | +3.69493 |

|   |          |          |          |
|---|----------|----------|----------|
| H | +5.54588 | -0.21226 | +0.54880 |
| H | +3.80101 | -0.48728 | +0.52029 |
| H | +4.47034 | +1.07228 | -0.01302 |
| H | +2.35984 | +1.33082 | +0.72610 |
| H | +1.64069 | +2.13050 | +2.11183 |
| H | +1.28745 | -0.06925 | +3.20862 |
| H | +1.92255 | -0.89219 | +1.80497 |
| H | -0.57008 | +0.85519 | +1.86491 |
| H | -0.53711 | -0.88453 | +1.84906 |
| H | +0.32159 | +1.25889 | -0.43322 |
| H | +0.76011 | -0.61277 | -0.47604 |
| H | -0.97147 | -0.11461 | -0.46704 |
| H | +0.50167 | +2.10612 | -0.70783 |

\* E = +10.378 kcal/mol ; Conformer 055

|   |          |          |          |
|---|----------|----------|----------|
| C | +0.00000 | +0.00000 | +0.00000 |
| C | +0.00000 | +0.00000 | +1.49782 |
| C | +1.38529 | +0.00000 | +2.12020 |
| C | +2.22787 | -1.20559 | +1.71248 |
| C | +3.56493 | -1.15374 | +2.39711 |
| O | +3.70523 | -1.74798 | +3.59006 |
| C | +2.67174 | -2.51969 | +4.15612 |
| O | +4.49490 | -0.55431 | +1.94095 |
| H | +3.01558 | -2.78980 | +5.14701 |
| H | +1.74577 | -1.95640 | +4.24473 |
| H | +2.49599 | -3.42741 | +3.58329 |
| H | +1.69017 | -2.12872 | +1.91599 |
| H | +2.43190 | -1.17208 | +0.64736 |
| H | +1.91964 | +0.90419 | +1.83062 |
| H | +1.28735 | +0.03644 | +3.20540 |
| H | -0.53666 | +0.88296 | +1.85321 |
| H | -0.57052 | -0.85720 | +1.86177 |
| H | +0.29144 | -1.27046 | -0.41488 |
| H | -0.96902 | +0.13460 | -0.46657 |
| H | +0.77692 | +0.58910 | -0.47728 |
| H | +0.44812 | -2.13156 | -0.66063 |

\* E = +10.560 kcal/mol ; Conformer 056

|   |          |          |          |
|---|----------|----------|----------|
| C | +0.00000 | +0.00000 | +0.00000 |
| C | +0.00000 | +0.00000 | +1.49693 |
| C | +1.37881 | +0.00000 | +2.13960 |
| C | +2.18404 | -1.26120 | +1.87518 |
| C | +3.03308 | -1.18595 | +0.63309 |
| O | +3.63364 | -2.31175 | +0.22258 |
| C | +3.45405 | -3.53376 | +0.89954 |
| O | +3.22191 | -0.17788 | +0.01859 |
| H | +4.12440 | -4.23628 | +0.42011 |
| H | +3.71638 | -3.45647 | +1.95195 |

|   |          |          |          |
|---|----------|----------|----------|
| H | +2.43357 | -3.89785 | +0.80255 |
| H | +2.86881 | -1.45543 | +2.70271 |
| H | +1.53086 | -2.13295 | +1.82631 |
| H | +1.94784 | +0.85882 | +1.78931 |
| H | +1.25399 | +0.11004 | +3.21499 |
| H | -0.54836 | +0.87377 | +1.84950 |
| H | -0.56160 | -0.86661 | +1.86320 |
| H | +0.59417 | +1.18252 | -0.36384 |
| H | +0.63262 | -0.72584 | -0.49680 |
| H | -0.97654 | +0.08405 | -0.46326 |
| H | +0.96264 | +1.98698 | -0.54752 |

\* E = +10.610 kcal/mol ; Conformer 057

|   |          |          |          |
|---|----------|----------|----------|
| C | +0.00000 | +0.00000 | +0.00000 |
| C | +0.00000 | +0.00000 | +1.49652 |
| C | +1.41367 | +0.00000 | +2.06384 |
| C | +1.45463 | +0.03010 | +3.59286 |
| C | +0.83374 | -1.20498 | +4.18398 |
| O | +1.59600 | -2.29571 | +4.34385 |
| C | +2.99130 | -2.25946 | +4.15166 |
| O | -0.32761 | -1.27075 | +4.46669 |
| H | +3.33051 | -3.28124 | +4.26944 |
| H | +3.25800 | -1.91072 | +3.15734 |
| H | +3.47657 | -1.63831 | +4.90129 |
| H | +2.47722 | +0.16671 | +3.93444 |
| H | +0.86610 | +0.86811 | +3.95424 |
| H | +1.95275 | -0.87089 | +1.68880 |
| H | +1.95080 | +0.87338 | +1.69567 |
| H | -0.52894 | +0.87768 | +1.86840 |
| H | -0.54640 | -0.86389 | +1.87081 |
| H | -1.31592 | +0.03182 | -0.38991 |
| H | +0.39280 | +0.89246 | -0.47606 |
| H | +0.34912 | -0.91090 | -0.47473 |
| H | -2.19089 | +0.05588 | -0.61450 |

\* E = +10.678 kcal/mol ; Conformer 058

|   |          |          |          |
|---|----------|----------|----------|
| C | +0.00000 | +0.00000 | +0.00000 |
| C | +0.00000 | +0.00000 | +1.49756 |
| C | +1.39547 | +0.00000 | +2.11132 |
| C | +2.19157 | +1.25862 | +1.77983 |
| C | +3.50306 | +1.25801 | +2.51528 |
| O | +4.57238 | +0.70205 | +1.93039 |
| C | +4.53033 | +0.23955 | +0.60043 |
| O | +3.61409 | +1.68996 | +3.62572 |
| H | +5.48206 | -0.24790 | +0.42848 |
| H | +3.73086 | -0.48089 | +0.44506 |
| H | +4.42380 | +1.06373 | -0.10141 |
| H | +2.32512 | +1.35648 | +0.70581 |

|   |          |          |          |
|---|----------|----------|----------|
| H | +1.64759 | +2.13058 | +2.13183 |
| H | +1.31153 | -0.07664 | +3.19407 |
| H | +1.93661 | -0.88672 | +1.77790 |
| H | -0.55163 | +0.86482 | +1.86645 |
| H | -0.52999 | -0.88143 | +1.85724 |
| H | -1.30579 | -0.14612 | -0.37815 |
| H | +0.26325 | +0.93135 | -0.48889 |
| H | +0.46145 | -0.86249 | -0.47063 |
| H | -2.18131 | -0.25282 | -0.58808 |

\* E = +10.716 kcal/mol ; Conformer 059

|   |          |          |          |
|---|----------|----------|----------|
| C | +0.00000 | +0.00000 | +0.00000 |
| C | +0.00000 | +0.00000 | +1.49734 |
| C | +1.39688 | +0.00000 | +2.10823 |
| C | +2.20907 | -1.23801 | +1.73992 |
| C | +3.56923 | -1.17930 | +2.37792 |
| O | +3.73609 | -1.70841 | +3.59745 |
| C | +2.70665 | -2.42291 | +4.24071 |
| O | +4.49647 | -0.63055 | +1.85729 |
| H | +3.07705 | -2.64103 | +5.23480 |
| H | +1.79506 | -1.83609 | +4.32443 |
| H | +2.49560 | -3.35945 | +3.72933 |
| H | +1.66375 | -2.13929 | +2.01142 |
| H | +2.38075 | -1.25972 | +0.66851 |
| H | +1.94474 | +0.88210 | +1.77995 |
| H | +1.30695 | +0.07808 | +3.19236 |
| H | -0.52800 | +0.88286 | +1.85691 |
| H | -0.55548 | -0.86353 | +1.86523 |
| H | -1.30741 | +0.16049 | -0.37459 |
| H | +0.47302 | +0.85624 | -0.46934 |
| H | +0.25344 | -0.93386 | -0.48877 |
| H | -2.18201 | +0.27610 | -0.57885 |

\* E = +11.031 kcal/mol ; Conformer 060

|   |          |          |          |
|---|----------|----------|----------|
| C | +0.00000 | +0.00000 | +0.00000 |
| C | +0.00000 | +0.00000 | +1.49713 |
| C | +1.38604 | +0.00000 | +2.12157 |
| C | +2.18293 | -1.26632 | +1.81745 |
| C | +3.51859 | -1.22103 | +2.50672 |
| O | +3.61432 | -1.68930 | +3.75907 |
| C | +2.54115 | -2.35237 | +4.38534 |
| O | +4.48676 | -0.73479 | +1.99947 |
| H | +2.86037 | -2.53049 | +5.40487 |
| H | +1.63898 | -1.74561 | +4.39884 |
| H | +2.33427 | -3.30790 | +3.90841 |
| H | +1.60793 | -2.14697 | +2.09607 |
| H | +2.39879 | -1.32777 | +0.75614 |
| H | +1.95147 | +0.85985 | +1.76539 |

|   |          |          |          |
|---|----------|----------|----------|
| H | +1.28685 | +0.12153 | +3.20022 |
| H | -0.54492 | +0.87420 | +1.85259 |
| H | -0.55931 | -0.86785 | +1.86195 |
| H | +0.62800 | +1.16154 | -0.37108 |
| H | +0.60310 | -0.75591 | -0.49006 |
| H | -0.97048 | +0.11574 | -0.46829 |
| H | +1.03152 | +1.94971 | -0.57176 |

\* E = +11.207 kcal/mol ; Conformer 061

|   |          |          |          |
|---|----------|----------|----------|
| C | +0.00000 | +0.00000 | +0.00000 |
| C | +0.00000 | +0.00000 | +1.49778 |
| C | +1.38663 | +0.00000 | +2.12108 |
| C | +2.16913 | +1.29965 | +1.91851 |
| C | +1.48902 | +2.44195 | +2.61903 |
| O | +1.80332 | +2.69501 | +3.89826 |
| C | +2.85430 | +2.02177 | +4.55084 |
| O | +0.63308 | +3.09899 | +2.10072 |
| H | +2.82520 | +2.35927 | +5.57964 |
| H | +2.72290 | +0.94267 | +4.52922 |
| H | +3.81904 | +2.28282 | +4.12143 |
| H | +3.19297 | +1.17014 | +2.25744 |
| H | +2.19702 | +1.55751 | +0.86483 |
| H | +1.29805 | -0.21017 | +3.18721 |
| H | +1.97076 | -0.81609 | +1.69562 |
| H | -0.57781 | +0.84783 | +1.86453 |
| H | -0.52424 | -0.89483 | +1.84438 |
| H | +0.38602 | +1.23417 | -0.47319 |
| H | +0.72287 | -0.65824 | -0.47336 |
| H | -0.97903 | -0.06805 | -0.46007 |
| H | +0.61317 | +2.04063 | -0.81128 |

\* E = +11.443 kcal/mol ; Conformer 062

|   |          |          |          |
|---|----------|----------|----------|
| C | +0.00000 | +0.00000 | +0.00000 |
| C | +0.00000 | +0.00000 | +1.49834 |
| C | +1.39434 | +0.00000 | +2.11768 |
| C | +1.98928 | -1.39310 | +2.34067 |
| C | +1.93047 | -2.25944 | +1.11437 |
| O | +2.88801 | -2.13828 | +0.18587 |
| C | +4.05073 | -1.37606 | +0.42123 |
| O | +1.02468 | -3.01575 | +0.90891 |
| H | +4.60650 | -1.39381 | -0.50798 |
| H | +3.81797 | -0.34560 | +0.67407 |
| H | +4.65926 | -1.82118 | +1.20518 |
| H | +3.00516 | -1.30350 | +2.71815 |
| H | +1.39972 | -1.91387 | +3.08889 |
| H | +2.05579 | +0.60862 | +1.50153 |
| H | +1.36238 | +0.48337 | +3.09204 |
| H | -0.54309 | +0.87763 | +1.84672 |



|   |          |          |          |
|---|----------|----------|----------|
| H | -0.55917 | -0.86768 | +1.85950 |
| H | +0.61729 | +1.17308 | -0.35954 |
| H | +0.61262 | -0.74445 | -0.49502 |
| H | -0.97238 | +0.10564 | -0.46689 |
| H | +1.02726 | +1.96394 | -0.54035 |

\* E = +11.785 kcal/mol ; Conformer 063

|   |          |          |          |
|---|----------|----------|----------|
| C | +0.00000 | +0.00000 | +0.00000 |
| C | +0.00000 | +0.00000 | +1.49955 |
| C | +1.39546 | +0.00000 | +2.12572 |
| C | +2.03453 | +1.38271 | +2.26831 |
| C | +2.05081 | +2.17272 | +0.98968 |
| O | +3.03406 | +1.95996 | +0.10626 |
| C | +4.15341 | +1.16568 | +0.42614 |
| O | +1.19082 | +2.95939 | +0.71302 |
| H | +4.73679 | +1.09952 | -0.48385 |
| H | +4.75841 | +1.63348 | +1.19966 |
| H | +3.86820 | +0.16457 | +0.73695 |
| H | +1.44425 | +1.97324 | +2.96224 |
| H | +3.03472 | +1.28233 | +2.68371 |
| H | +1.33810 | -0.42042 | +3.12872 |
| H | +2.04289 | -0.66685 | +1.55625 |
| H | -0.56242 | +0.85761 | +1.86769 |
| H | -0.52267 | -0.89077 | +1.84767 |
| H | -1.29048 | -0.23888 | -0.36499 |
| H | +0.19923 | +0.94181 | -0.49429 |
| H | +0.50965 | -0.83980 | -0.46223 |
| H | -2.15937 | -0.42479 | -0.56205 |

\* E = +12.154 kcal/mol ; Conformer 064

|   |          |          |          |
|---|----------|----------|----------|
| C | +0.00000 | +0.00000 | +0.00000 |
| C | +0.00000 | +0.00000 | +1.49668 |
| C | +1.38867 | +0.00000 | +2.11698 |
| C | +2.20549 | -1.26370 | +1.80080 |
| C | +3.13674 | -1.09456 | +0.63156 |
| O | +4.25524 | -0.38125 | +0.82032 |
| C | +4.68329 | -0.00365 | +2.10884 |
| O | +2.91686 | -1.53740 | -0.45877 |
| H | +5.54989 | +0.62785 | +1.95690 |
| H | +3.92537 | +0.55930 | +2.64670 |
| H | +4.97831 | -0.87267 | +2.69330 |
| H | +2.77735 | -1.56796 | +2.67460 |
| H | +1.54289 | -2.08603 | +1.54742 |
| H | +1.92111 | +0.88966 | +1.77973 |
| H | +1.28718 | +0.09145 | +3.19671 |
| H | -0.54597 | +0.87010 | +1.86156 |
| H | -0.54943 | -0.87291 | +1.86348 |
| H | +0.63789 | +1.15984 | -0.35791 |

|   |          |          |          |
|---|----------|----------|----------|
| H | +0.60894 | -0.75321 | -0.48648 |
| H | -0.97000 | +0.12771 | -0.46627 |
| H | +1.05007 | +1.95105 | -0.53422 |

### S.3. Scaled Vibrational Frequencies

Vibrational frequencies for all structures at the MPWB1K/6-31+G(d,p) level

#### S.3.1 Methyl Pentanoate

=====  
Structure 1  
=====

|           |           |           |           |           |           |
|-----------|-----------|-----------|-----------|-----------|-----------|
| 35.3664   | 72.6927   | 103.0518  | 138.4946  | 171.6618  | 207.1096  |
| 240.2512  | 248.6141  | 298.4475  | 355.9804  | 508.8580  | 572.3890  |
| 643.6802  | 727.0313  | 826.4585  | 832.1250  | 903.2286  | 922.4480  |
| 1000.5941 | 1038.3569 | 1052.4558 | 1092.5487 | 1115.1181 | 1148.3548 |
| 1175.2698 | 1194.7123 | 1228.6843 | 1249.7998 | 1285.6510 | 1294.0600 |
| 1365.7165 | 1375.2857 | 1380.8817 | 1414.5495 | 1435.1774 | 1440.3502 |
| 1444.0875 | 1448.9559 | 1455.2755 | 1457.7962 | 1461.3740 | 1799.7239 |
| 2953.2472 | 2958.4071 | 2966.5384 | 2977.2054 | 2987.5213 | 3002.2907 |
| 3017.5002 | 3026.6462 | 3037.2387 | 3042.7339 | 3070.7396 | 3103.6246 |

=====  
Structure 2  
=====

|           |           |           |           |           |           |
|-----------|-----------|-----------|-----------|-----------|-----------|
| 28.9145   | 66.9109   | 101.8277  | 115.6596  | 135.5822  | 173.2454  |
| 238.5680  | 250.5845  | 300.4398  | 338.3697  | 475.8559  | 569.8975  |
| 689.5433  | 708.4014  | 779.6823  | 880.7592  | 907.7988  | 911.5259  |
| 1013.1212 | 1043.5694 | 1064.1965 | 1096.9065 | 1114.8467 | 1148.3603 |
| 1174.6343 | 1195.4726 | 1206.2345 | 1270.6187 | 1272.0407 | 1286.4250 |
| 1347.0098 | 1377.6096 | 1391.7968 | 1416.2550 | 1439.2853 | 1443.8311 |
| 1444.2639 | 1451.3225 | 1454.8856 | 1458.0904 | 1464.4494 | 1802.9868 |
| 2948.3722 | 2960.3161 | 2969.5040 | 2976.5926 | 2982.1862 | 2987.2111 |
| 3006.2809 | 3026.3730 | 3037.2018 | 3043.1449 | 3070.3258 | 3102.9154 |

=====  
Structure 3  
=====

|           |           |           |           |           |           |
|-----------|-----------|-----------|-----------|-----------|-----------|
| 32.6511   | 50.6526   | 115.8413  | 140.8795  | 173.2882  | 190.6321  |
| 258.0006  | 271.6806  | 341.5745  | 386.1386  | 472.0116  | 574.2712  |
| 647.3149  | 737.1185  | 815.5147  | 834.8080  | 902.0515  | 931.8825  |
| 965.0255  | 1036.9013 | 1056.9398 | 1080.0186 | 1117.7307 | 1148.4065 |
| 1172.7838 | 1179.2469 | 1219.9458 | 1246.5726 | 1281.9533 | 1329.2921 |

|           |           |           |           |           |           |
|-----------|-----------|-----------|-----------|-----------|-----------|
| 1355.9637 | 1375.6449 | 1380.8620 | 1417.0313 | 1433.1646 | 1440.5326 |
| 1444.0153 | 1449.7684 | 1457.7464 | 1458.4358 | 1464.0266 | 1799.3162 |
| 2958.2703 | 2966.2860 | 2971.7605 | 2981.0657 | 2987.3396 | 3010.7744 |
| 3020.8317 | 3035.1263 | 3037.8102 | 3042.2606 | 3070.5147 | 3103.3657 |

=====  
Structure 4  
=====

|           |           |           |           |           |           |
|-----------|-----------|-----------|-----------|-----------|-----------|
| 25.6240   | 57.7862   | 103.4400  | 135.9477  | 138.2032  | 171.5125  |
| 232.7792  | 274.8168  | 305.5469  | 408.6856  | 432.2551  | 571.0713  |
| 686.7956  | 732.5295  | 776.2857  | 867.9692  | 905.6911  | 922.1417  |
| 970.2006  | 1040.2194 | 1072.1507 | 1095.4224 | 1111.3809 | 1148.4883 |
| 1175.0674 | 1184.7434 | 1211.3073 | 1259.6126 | 1278.7417 | 1317.9535 |
| 1338.2983 | 1378.2631 | 1388.4151 | 1417.1762 | 1438.3919 | 1443.7566 |
| 1444.1271 | 1448.3729 | 1457.6431 | 1458.3995 | 1463.2944 | 1801.7221 |
| 2955.0754 | 2960.0771 | 2970.0545 | 2977.5622 | 2986.9150 | 3000.4191 |
| 3012.6784 | 3032.2084 | 3036.6547 | 3042.7441 | 3069.8946 | 3102.6854 |

=====  
Structure 5  
=====

|           |           |           |           |           |           |
|-----------|-----------|-----------|-----------|-----------|-----------|
| 36.1288   | 68.3588   | 89.1474   | 137.9253  | 176.3725  | 200.7465  |
| 241.3907  | 253.5662  | 304.4886  | 376.2725  | 497.7936  | 593.2835  |
| 651.7352  | 730.7477  | 827.2068  | 837.6667  | 871.5393  | 924.8930  |
| 994.0814  | 1036.6032 | 1060.7587 | 1097.6759 | 1113.2684 | 1148.6774 |
| 1178.0738 | 1193.5650 | 1229.4830 | 1269.2569 | 1288.0096 | 1306.8052 |
| 1339.4949 | 1368.6080 | 1378.9623 | 1422.0158 | 1434.2044 | 1443.0537 |
| 1443.8224 | 1447.2835 | 1455.1597 | 1457.7205 | 1461.2533 | 1801.3461 |
| 2953.5985 | 2959.2430 | 2968.6775 | 2981.1708 | 2987.0983 | 2990.0053 |
| 3019.6185 | 3035.8150 | 3043.4985 | 3048.5271 | 3070.2509 | 3102.6585 |

=====  
Structure 6  
=====

|           |           |           |           |           |           |
|-----------|-----------|-----------|-----------|-----------|-----------|
| 23.3371   | 72.5143   | 89.8839   | 114.9714  | 138.9457  | 186.2837  |
| 235.2336  | 255.1396  | 303.5781  | 360.9901  | 430.9901  | 637.1246  |
| 708.0817  | 723.5612  | 776.9836  | 866.6515  | 891.0453  | 916.4148  |
| 1015.6831 | 1045.8740 | 1058.5812 | 1101.5080 | 1109.6788 | 1148.5191 |
| 1177.8919 | 1194.5365 | 1230.2243 | 1263.9921 | 1289.7361 | 1302.7301 |
| 1328.4426 | 1370.1124 | 1378.0206 | 1428.0331 | 1437.9219 | 1443.4660 |
| 1445.9614 | 1453.5397 | 1454.9944 | 1457.7367 | 1464.5189 | 1802.5363 |
| 2951.8857 | 2959.9499 | 2962.6675 | 2979.2016 | 2987.2593 | 2987.8769 |
| 3016.7041 | 3036.9593 | 3043.9592 | 3054.5888 | 3070.4693 | 3102.7964 |

=====

Structure 7

|           |           |           |           |           |           |
|-----------|-----------|-----------|-----------|-----------|-----------|
| 32.9854   | 86.8921   | 114.8015  | 140.6820  | 171.7617  | 223.5834  |
| 267.5062  | 293.7874  | 320.6895  | 383.6760  | 475.0086  | 570.0099  |
| 668.2863  | 751.8845  | 806.1423  | 850.1962  | 912.1656  | 917.1085  |
| 967.4818  | 1039.0998 | 1064.4205 | 1082.7968 | 1109.1732 | 1148.4580 |
| 1173.9733 | 1190.4154 | 1222.4426 | 1246.8553 | 1273.4033 | 1334.9080 |
| 1347.0214 | 1376.7274 | 1382.1064 | 1416.6710 | 1437.9763 | 1439.9796 |
| 1443.5917 | 1446.1556 | 1456.3086 | 1457.5576 | 1468.1151 | 1799.1446 |
| 2952.3163 | 2959.6223 | 2971.3053 | 2978.0826 | 2987.2160 | 2997.4605 |
| 3023.0890 | 3030.4604 | 3033.6915 | 3048.8827 | 3070.5923 | 3103.3154 |

Structure 8

|           |           |           |           |           |           |
|-----------|-----------|-----------|-----------|-----------|-----------|
| 22.9687   | 50.4414   | 107.4807  | 140.1412  | 165.1621  | 185.9078  |
| 259.9660  | 291.1979  | 333.5345  | 409.0017  | 461.8820  | 603.2254  |
| 686.7950  | 740.8572  | 819.0970  | 837.2932  | 882.7138  | 931.5430  |
| 961.3261  | 1029.0170 | 1066.2538 | 1090.4125 | 1111.2560 | 1148.3761 |
| 1166.4529 | 1179.7610 | 1218.5747 | 1268.3512 | 1286.8161 | 1324.5913 |
| 1339.6616 | 1358.1673 | 1379.5948 | 1428.1062 | 1434.3174 | 1443.5353 |
| 1445.4885 | 1448.8007 | 1457.3749 | 1457.7427 | 1469.3528 | 1800.1177 |
| 2955.3748 | 2959.6486 | 2968.9121 | 2986.7069 | 2994.7974 | 3000.2621 |
| 3022.1128 | 3036.4198 | 3047.8189 | 3064.7498 | 3069.6655 | 3102.7339 |

Structure 9

|           |           |           |           |           |           |
|-----------|-----------|-----------|-----------|-----------|-----------|
| 23.5783   | 51.5460   | 109.4585  | 116.6409  | 140.2003  | 207.7136  |
| 229.2530  | 275.5726  | 294.3105  | 402.5915  | 433.9081  | 627.6231  |
| 720.6306  | 728.6421  | 771.1416  | 865.7751  | 877.2122  | 931.4716  |
| 967.3883  | 1047.9419 | 1072.9618 | 1091.4596 | 1110.7645 | 1148.5195 |
| 1177.8105 | 1184.3776 | 1235.0333 | 1271.3855 | 1279.5110 | 1318.8182 |
| 1336.9179 | 1361.8023 | 1379.7554 | 1427.9538 | 1437.5893 | 1443.3189 |
| 1445.0318 | 1449.7780 | 1457.8340 | 1458.5603 | 1463.5877 | 1801.8016 |
| 2958.0363 | 2961.2652 | 2967.8286 | 2986.8479 | 2987.1667 | 2999.7465 |
| 3016.6029 | 3038.2081 | 3043.7731 | 3053.9913 | 3070.1944 | 3102.5436 |

Structure 10

|          |          |          |          |          |          |
|----------|----------|----------|----------|----------|----------|
| 23.5001  | 50.9613  | 101.1967 | 124.5887 | 141.3253 | 205.9427 |
| 230.5068 | 277.0316 | 296.1630 | 413.5228 | 419.4636 | 627.5353 |
| 707.2961 | 741.6367 | 779.8952 | 869.3776 | 876.5654 | 923.4966 |

|           |           |           |           |           |           |
|-----------|-----------|-----------|-----------|-----------|-----------|
| 969.2756  | 1042.9926 | 1075.0351 | 1095.7293 | 1108.2018 | 1148.6274 |
| 1177.3940 | 1183.9991 | 1239.1060 | 1258.6123 | 1291.1131 | 1318.3049 |
| 1337.5177 | 1362.7545 | 1379.8160 | 1428.5284 | 1438.3309 | 1443.5473 |
| 1444.0856 | 1450.0963 | 1457.7866 | 1458.9534 | 1463.3250 | 1801.8291 |
| 2956.1958 | 2960.8272 | 2962.2753 | 2978.8654 | 2987.0709 | 3000.3329 |
| 3021.8944 | 3038.6337 | 3044.6020 | 3066.3503 | 3070.2209 | 3102.5426 |

=====  
Structure 11  
=====

|           |           |           |           |           |           |
|-----------|-----------|-----------|-----------|-----------|-----------|
| 50.9253   | 63.1419   | 97.9178   | 141.7157  | 177.7971  | 211.8418  |
| 259.9607  | 298.5208  | 315.8840  | 392.8030  | 478.2659  | 583.2222  |
| 661.3497  | 753.5054  | 803.2964  | 847.5829  | 878.4845  | 917.6957  |
| 972.1316  | 1035.1816 | 1071.2316 | 1086.2293 | 1111.0587 | 1148.0367 |
| 1178.5560 | 1194.0097 | 1225.7452 | 1268.6186 | 1285.7233 | 1336.1506 |
| 1342.6910 | 1359.0527 | 1381.0455 | 1418.6679 | 1434.3891 | 1442.2027 |
| 1443.3842 | 1446.2999 | 1456.6098 | 1458.0153 | 1469.8881 | 1797.5715 |
| 2955.3290 | 2962.4276 | 2970.7273 | 2978.3212 | 2986.0340 | 2997.7094 |
| 3021.5502 | 3040.6391 | 3043.4916 | 3044.5949 | 3069.2166 | 3102.0235 |

=====  
Structure 12  
=====

|           |           |           |           |           |           |
|-----------|-----------|-----------|-----------|-----------|-----------|
| 48.3265   | 74.0559   | 110.9561  | 132.9007  | 195.4003  | 228.5092  |
| 241.3858  | 254.8987  | 281.4739  | 406.6109  | 530.4241  | 548.6960  |
| 584.5919  | 712.4159  | 783.4638  | 832.5547  | 877.5071  | 924.4528  |
| 1013.2859 | 1053.3307 | 1081.4636 | 1088.3713 | 1115.9770 | 1139.8109 |
| 1151.2994 | 1199.7248 | 1226.6293 | 1249.7634 | 1287.4089 | 1295.1959 |
| 1366.1263 | 1373.8105 | 1379.4753 | 1407.6802 | 1433.8672 | 1447.5026 |
| 1449.2595 | 1455.5716 | 1458.2562 | 1461.3136 | 1463.3050 | 1821.5992 |
| 2950.5257 | 2958.6229 | 2959.7835 | 2966.8730 | 2970.3848 | 3004.8044 |
| 3011.4598 | 3026.0471 | 3039.1445 | 3043.9726 | 3044.3855 | 3088.6179 |

=====  
Structure 13  
=====

|           |           |           |           |           |           |
|-----------|-----------|-----------|-----------|-----------|-----------|
| 35.5626   | 80.5571   | 99.4917   | 108.1027  | 130.3072  | 197.5410  |
| 238.2671  | 245.5484  | 298.7136  | 392.9820  | 528.3451  | 533.2690  |
| 587.4982  | 709.5683  | 785.2610  | 839.3191  | 895.6698  | 910.0537  |
| 1027.9077 | 1066.1698 | 1083.4746 | 1090.2509 | 1114.4366 | 1138.7301 |
| 1149.1146 | 1196.8396 | 1209.5240 | 1267.6100 | 1275.1518 | 1287.2379 |
| 1344.9100 | 1377.9587 | 1388.9289 | 1410.4846 | 1442.4480 | 1446.8005 |
| 1450.3917 | 1454.9931 | 1458.3030 | 1461.5754 | 1464.0213 | 1823.7780 |
| 2946.7533 | 2956.9288 | 2961.5880 | 2967.3268 | 2981.4298 | 2981.8896 |
| 2996.7388 | 3029.8776 | 3039.2214 | 3043.8453 | 3044.1524 | 3088.7826 |

=====  
 Structure 14  
 =====

|           |           |           |           |           |           |
|-----------|-----------|-----------|-----------|-----------|-----------|
| 31.0274   | 74.0245   | 96.6259   | 118.3186  | 144.8142  | 198.5363  |
| 244.1651  | 271.3694  | 310.2214  | 425.4440  | 503.5315  | 534.9920  |
| 590.2630  | 727.1406  | 780.1155  | 843.4938  | 877.6192  | 922.3728  |
| 979.0101  | 1070.5545 | 1085.3624 | 1093.0635 | 1111.0093 | 1139.0194 |
| 1148.6516 | 1184.6388 | 1213.6680 | 1258.5296 | 1283.7839 | 1313.9890 |
| 1337.9866 | 1378.3087 | 1385.1528 | 1410.9724 | 1442.6170 | 1445.9255 |
| 1447.8393 | 1457.0576 | 1459.1107 | 1462.1219 | 1463.2443 | 1823.6606 |
| 2954.5726 | 2957.8141 | 2960.4015 | 2967.0785 | 2982.1258 | 3000.9235 |
| 3003.5323 | 3034.5819 | 3036.0270 | 3042.3310 | 3043.4369 | 3088.5757 |

=====  
 Structure 15  
 =====

|           |           |           |           |           |           |
|-----------|-----------|-----------|-----------|-----------|-----------|
| 46.0186   | 50.0523   | 117.2952  | 142.1049  | 199.8696  | 215.4490  |
| 255.0684  | 262.3307  | 347.7800  | 410.1493  | 525.2304  | 533.6492  |
| 581.2254  | 723.7558  | 785.3292  | 821.3478  | 879.7453  | 929.0097  |
| 974.4113  | 1057.7289 | 1075.9690 | 1084.0414 | 1117.9928 | 1139.7073 |
| 1151.1668 | 1182.3170 | 1218.8431 | 1245.5532 | 1284.9139 | 1328.4702 |
| 1357.2774 | 1373.9220 | 1379.5715 | 1409.8110 | 1431.9847 | 1447.4519 |
| 1449.8340 | 1457.1478 | 1459.5929 | 1462.8776 | 1464.1291 | 1821.1462 |
| 2956.8134 | 2962.0787 | 2966.4252 | 2972.1420 | 2976.7675 | 3014.3237 |
| 3015.9592 | 3032.4973 | 3037.9289 | 3041.3727 | 3044.1459 | 3088.3161 |

=====  
 Structure 16  
 =====

|           |           |           |           |           |           |
|-----------|-----------|-----------|-----------|-----------|-----------|
| 45.3419   | 96.3700   | 119.0158  | 135.4008  | 203.8977  | 226.5133  |
| 259.2729  | 297.5134  | 314.9653  | 421.1364  | 527.4831  | 528.0490  |
| 578.6438  | 743.7405  | 774.9678  | 829.2915  | 888.5680  | 920.8431  |
| 978.6432  | 1065.9909 | 1084.3378 | 1084.6123 | 1108.3260 | 1139.8116 |
| 1149.5001 | 1198.1288 | 1220.0039 | 1245.6809 | 1272.9565 | 1335.3858 |
| 1346.3152 | 1375.9736 | 1383.6189 | 1407.8208 | 1436.2985 | 1443.3573 |
| 1447.6267 | 1454.1450 | 1458.9736 | 1461.8517 | 1464.1626 | 1822.3988 |
| 2947.3577 | 2960.2815 | 2963.3498 | 2966.8990 | 2979.5065 | 2996.9358 |
| 3007.8792 | 3033.1748 | 3035.0888 | 3044.2526 | 3056.0678 | 3088.0535 |

=====  
 Structure 17  
 =====

|         |         |          |          |          |          |
|---------|---------|----------|----------|----------|----------|
| 50.5702 | 74.0302 | 108.6734 | 121.6780 | 156.4066 | 205.2123 |
|---------|---------|----------|----------|----------|----------|

|           |           |           |           |           |           |
|-----------|-----------|-----------|-----------|-----------|-----------|
| 236.0208  | 258.1958  | 329.9553  | 374.9186  | 469.3950  | 583.9233  |
| 706.5398  | 711.3731  | 771.8654  | 828.5424  | 895.2659  | 914.5243  |
| 1008.8494 | 1055.2479 | 1059.6571 | 1099.1369 | 1121.2216 | 1141.3261 |
| 1160.1320 | 1192.7948 | 1224.8547 | 1256.6874 | 1285.9062 | 1297.6052 |
| 1328.2991 | 1366.5493 | 1378.3858 | 1442.7199 | 1443.4075 | 1447.8509 |
| 1453.1178 | 1455.3103 | 1461.6508 | 1463.6079 | 1469.4400 | 1820.4312 |
| 2952.1348 | 2959.1153 | 2961.9313 | 2967.4953 | 2988.5971 | 2999.1602 |
| 3013.2967 | 3038.3578 | 3045.9945 | 3046.1379 | 3057.6372 | 3087.4234 |

=====  
Structure 18  
=====

|           |           |           |           |           |           |
|-----------|-----------|-----------|-----------|-----------|-----------|
| 54.4806   | 89.4732   | 123.6233  | 147.1133  | 179.4399  | 198.6029  |
| 250.7499  | 314.4358  | 338.4389  | 434.2916  | 479.5947  | 564.7278  |
| 708.2853  | 711.6097  | 777.7917  | 817.2208  | 884.1099  | 931.9221  |
| 959.9840  | 1048.1320 | 1068.8831 | 1101.1622 | 1113.1216 | 1140.8714 |
| 1147.2994 | 1180.5678 | 1215.9268 | 1263.7089 | 1287.1938 | 1320.6324 |
| 1335.2891 | 1361.4522 | 1379.2681 | 1434.6206 | 1444.7327 | 1448.1862 |
| 1451.0445 | 1454.0397 | 1462.3056 | 1464.4166 | 1475.3744 | 1814.7278 |
| 2958.3300 | 2960.1741 | 2969.2306 | 2969.9495 | 3000.7447 | 3008.2809 |
| 3015.4072 | 3036.7482 | 3049.9873 | 3053.3374 | 3064.6235 | 3088.4718 |

=====  
Structure 19  
=====

|           |           |           |           |           |           |
|-----------|-----------|-----------|-----------|-----------|-----------|
| 54.0848   | 65.6707   | 102.6993  | 125.9439  | 195.0152  | 197.8166  |
| 236.7079  | 248.4686  | 326.7711  | 420.5544  | 471.0777  | 563.4045  |
| 695.5959  | 727.5727  | 768.7674  | 824.7833  | 876.4405  | 928.4540  |
| 994.9278  | 1041.7511 | 1061.9102 | 1097.9720 | 1120.4087 | 1141.2473 |
| 1156.7439 | 1189.6830 | 1217.2836 | 1263.5871 | 1286.3812 | 1305.5552 |
| 1329.3529 | 1369.9230 | 1380.7525 | 1438.8230 | 1445.9255 | 1447.6332 |
| 1449.0352 | 1455.8285 | 1462.5929 | 1462.7996 | 1465.7689 | 1818.1515 |
| 2954.2893 | 2958.2565 | 2969.1949 | 2970.7958 | 2992.6941 | 3004.9223 |
| 3016.5865 | 3036.9026 | 3045.4375 | 3049.2770 | 3058.3202 | 3087.9340 |

=====  
Structure 20  
=====

|           |           |           |           |           |           |
|-----------|-----------|-----------|-----------|-----------|-----------|
| 36.4431   | 61.6358   | 111.1773  | 138.4987  | 172.1451  | 207.2298  |
| 227.5173  | 276.6876  | 324.5194  | 417.7556  | 470.9634  | 582.2723  |
| 695.9409  | 723.4817  | 772.3973  | 828.2123  | 881.0126  | 930.0774  |
| 960.1409  | 1064.5443 | 1072.3513 | 1086.6505 | 1120.1343 | 1140.9294 |
| 1156.8692 | 1184.0697 | 1227.8501 | 1264.7487 | 1273.7979 | 1318.2877 |
| 1335.5628 | 1357.3789 | 1378.9812 | 1439.2748 | 1444.4946 | 1446.1094 |
| 1451.4943 | 1457.2252 | 1462.9635 | 1464.3598 | 1467.9063 | 1820.1673 |

|           |           |           |           |           |           |
|-----------|-----------|-----------|-----------|-----------|-----------|
| 2956.5661 | 2959.6439 | 2962.7179 | 2967.3311 | 3004.1830 | 3004.9523 |
| 3016.5950 | 3036.0779 | 3044.8667 | 3046.0432 | 3061.3516 | 3087.3784 |

=====  
 Structure 21  
 =====

|           |           |           |           |           |           |
|-----------|-----------|-----------|-----------|-----------|-----------|
| 43.3676   | 63.4611   | 117.0215  | 134.1621  | 170.6649  | 206.0253  |
| 226.2958  | 281.9710  | 329.9898  | 414.3436  | 471.5077  | 581.7306  |
| 696.5252  | 723.2961  | 774.0382  | 836.8534  | 879.7313  | 921.9008  |
| 962.0394  | 1059.0080 | 1072.8834 | 1089.4776 | 1121.0864 | 1141.1555 |
| 1155.9568 | 1185.2646 | 1232.0164 | 1251.1719 | 1286.0607 | 1314.9075 |
| 1336.4441 | 1356.8487 | 1380.7762 | 1440.0918 | 1444.0305 | 1446.2723 |
| 1451.2543 | 1458.0705 | 1463.1689 | 1464.2595 | 1468.1797 | 1820.2558 |
| 2954.8160 | 2963.5230 | 2964.3295 | 2967.6025 | 2997.5721 | 2999.5711 |
| 3013.1204 | 3041.2315 | 3045.7981 | 3045.9344 | 3066.0514 | 3087.1913 |

=====  
 Structure 22  
 =====

|           |           |           |           |           |           |
|-----------|-----------|-----------|-----------|-----------|-----------|
| 50.4838   | 93.3254   | 115.7195  | 131.4071  | 182.0344  | 189.8718  |
| 218.6376  | 308.2678  | 337.3515  | 402.6648  | 472.4773  | 562.5372  |
| 696.7914  | 731.1843  | 764.1471  | 821.2653  | 896.7280  | 933.5535  |
| 966.8761  | 1052.6564 | 1076.4336 | 1078.2165 | 1119.7737 | 1140.4217 |
| 1155.7881 | 1191.1107 | 1212.3710 | 1262.9882 | 1284.4286 | 1320.2232 |
| 1334.1133 | 1360.9343 | 1383.2278 | 1437.2175 | 1443.1697 | 1447.3320 |
| 1449.5506 | 1458.8420 | 1461.6533 | 1462.5601 | 1464.7352 | 1815.5139 |
| 2962.3886 | 2963.4661 | 2967.8249 | 2971.8052 | 2997.4291 | 3010.4316 |
| 3013.3209 | 3038.3516 | 3052.6117 | 3057.7731 | 3060.2460 | 3089.2911 |

=====  
 Structure 23  
 =====

|           |           |           |           |           |           |
|-----------|-----------|-----------|-----------|-----------|-----------|
| 39.9811   | 94.5982   | 104.8508  | 153.1063  | 185.7604  | 215.7262  |
| 225.5678  | 278.5287  | 336.8674  | 429.5100  | 454.6442  | 562.2592  |
| 692.6837  | 752.2383  | 771.1656  | 817.1681  | 887.9738  | 932.7987  |
| 962.3776  | 1059.0515 | 1077.1864 | 1081.1197 | 1120.8006 | 1141.4955 |
| 1153.1347 | 1186.5018 | 1216.2676 | 1265.5236 | 1271.4337 | 1325.2824 |
| 1333.4141 | 1348.3247 | 1388.5636 | 1439.1477 | 1443.4039 | 1447.9920 |
| 1450.1083 | 1460.4251 | 1462.9026 | 1463.5460 | 1465.1442 | 1821.0896 |
| 2955.4074 | 2958.4610 | 2964.1401 | 2969.5049 | 2993.6759 | 2998.8502 |
| 3012.7396 | 3039.2359 | 3049.6538 | 3053.7487 | 3056.7495 | 3088.3521 |



### S.3.2 (TS<sub>α'</sub>)<sup>‡</sup>

=====  
 Structure 1  
 =====

|            |           |           |           |           |           |
|------------|-----------|-----------|-----------|-----------|-----------|
| 1431.5249i | 34.8851   | 69.5268   | 84.8107   | 113.0097  | 142.2970  |
| 210.6833   | 239.8106  | 248.5080  | 301.3207  | 313.6445  | 373.0964  |
| 510.3671   | 538.6479  | 567.4610  | 646.0675  | 726.4596  | 824.3386  |
| 827.7190   | 898.5196  | 921.0004  | 1006.1636 | 1052.3425 | 1052.7613 |
| 1078.9165  | 1092.6662 | 1125.0365 | 1156.9655 | 1191.2702 | 1205.6500 |
| 1228.7585  | 1235.5216 | 1250.7542 | 1285.9472 | 1293.3230 | 1364.5268 |
| 1373.7016  | 1380.1743 | 1412.4036 | 1421.9840 | 1435.6085 | 1448.9618 |
| 1455.4152  | 1461.4229 | 1550.7903 | 1811.4609 | 2953.1269 | 2959.0439 |
| 2967.9437  | 2976.8883 | 3000.5057 | 3017.2527 | 3026.3194 | 3037.3672 |
| 3038.2343  | 3043.6739 | 3151.5068 |           |           |           |

=====  
 Structure 2  
 =====

|            |           |           |           |           |           |
|------------|-----------|-----------|-----------|-----------|-----------|
| 1431.5268i | 33.7493   | 72.1943   | 89.4916   | 107.9736  | 146.7742  |
| 210.6110   | 240.4010  | 250.0574  | 300.6392  | 309.4333  | 375.3524  |
| 511.0758   | 537.7439  | 569.3236  | 645.6709  | 726.1733  | 823.6730  |
| 828.6720   | 899.1339  | 921.2796  | 1006.3926 | 1052.3981 | 1053.9473 |
| 1077.5610  | 1092.4552 | 1124.7292 | 1157.0447 | 1190.2355 | 1206.3631 |
| 1227.7786  | 1236.2132 | 1250.7687 | 1286.2480 | 1294.2697 | 1364.7336 |
| 1373.8090  | 1380.4896 | 1412.4873 | 1422.0722 | 1435.7121 | 1449.0265 |
| 1455.4284  | 1461.4573 | 1551.7069 | 1811.0539 | 2954.4763 | 2958.7785 |
| 2967.5197  | 2976.4378 | 3002.7068 | 3017.6568 | 3026.4296 | 3037.6498 |
| 3037.7509  | 3043.7200 | 3151.2777 |           |           |           |

=====  
 Structure 3  
 =====

|            |           |           |           |           |           |
|------------|-----------|-----------|-----------|-----------|-----------|
| 1430.9007i | 30.3639   | 63.9589   | 90.9246   | 109.1452  | 115.2264  |
| 146.7794   | 238.2038  | 257.0033  | 294.9809  | 315.5946  | 359.8338  |
| 479.0737   | 537.1845  | 565.7875  | 690.2768  | 708.1428  | 778.3261  |
| 877.2820   | 906.8472  | 908.0196  | 1021.4722 | 1054.5772 | 1063.6291 |
| 1079.8422  | 1096.1544 | 1122.1999 | 1157.3509 | 1193.3029 | 1195.4999 |
| 1222.6806  | 1238.6142 | 1267.3331 | 1270.5850 | 1287.0590 | 1344.1913 |
| 1377.8670  | 1390.3716 | 1414.5140 | 1421.8060 | 1443.9422 | 1451.0541 |
| 1455.0401  | 1464.2870 | 1549.8994 | 1813.8784 | 2949.5688 | 2960.9755 |
| 2969.6790  | 2977.3576 | 2983.8477 | 3006.7756 | 3027.3166 | 3037.6129 |
| 3038.2140  | 3044.0354 | 3150.7866 |           |           |           |

=====  
 Structure 4  
 =====

```

=====
1431.0118i    31.2695    48.4289    94.4351    114.1235    153.4813
 192.8508    256.1168    276.7505    310.3486    354.6361    391.4194
 476.1201    536.9778    571.2236    649.1167    736.2718    813.5057
 830.8828    898.5188    929.7470    967.7704    1053.5449    1058.8221
1076.8716    1082.1576    1125.7044    1156.9108    1175.6588    1202.1525
1223.3509    1231.1654    1249.3981    1281.9845    1328.3762    1355.9948
1374.1886    1380.1504    1414.9811    1422.2994    1433.9072    1449.7321
1458.5544    1464.1392    1551.1189    1810.5786    2958.7881    2967.4144
2972.7321    2980.2103    3011.7025    3021.0136    3035.5306    3037.7038
3038.4250    3043.1666    3151.3081

```

```

=====
                Structure    5
=====

```

```

1431.6659i    32.5196    49.2988    87.7511    123.3751    148.6386
 194.4413    257.1722    275.8291    315.0464    352.3871    392.3908
 475.7674    538.1790    568.9008    649.4099    736.4881    814.0489
 830.2848    897.3441    930.2267    967.9288    1052.0294    1059.1290
1077.2176    1083.2870    1126.0738    1156.6595    1176.9811    1201.9153
1224.0807    1231.3198    1249.4357    1282.0237    1328.1985    1356.1311
1374.2297    1380.1641    1415.0562    1422.1951    1434.1497    1449.7162
1458.6908    1464.1964    1550.3875    1810.9938    2958.8092    2968.0309
2972.8163    2981.0381    3011.4589    3021.4156    3035.3770    3038.0903
3038.3373    3042.5708    3151.5102

```

```

=====
                Structure    6
=====

```

```

1430.9151i    27.8393    55.8723    93.9328    105.6502    138.1564
 146.0713    233.6327    274.7718    309.2344    325.8870    412.9330
 437.7011    537.3160    566.9450    687.2268    731.7496    775.1924
 866.5068    900.0771    921.1845    973.1745    1055.0143    1071.3339
1083.5091    1094.7131    1116.4185    1157.4075    1184.8178    1195.1189
1224.4865    1239.8684    1258.3644    1278.4175    1313.0020    1338.2636
1378.5388    1386.8714    1415.4602    1421.1590    1444.0191    1447.8275
1457.9746    1463.2737    1549.7452    1813.4646    2956.3769    2960.3175
2970.1832    2977.8884    3001.7103    3012.2847    3032.2679    3036.9046
3037.5640    3043.3314    3150.7235

```

```

=====
                Structure    7
=====

```

```

1431.0680i    28.4487    55.7449    92.3355    107.4764    139.8521

```

|           |           |           |           |           |           |
|-----------|-----------|-----------|-----------|-----------|-----------|
| 144.8092  | 234.9267  | 272.1082  | 310.4186  | 326.9928  | 412.5175  |
| 437.9700  | 537.2537  | 566.9952  | 688.0518  | 730.9937  | 775.1661  |
| 866.8229  | 900.6762  | 920.8102  | 973.3979  | 1054.8128 | 1071.3187 |
| 1083.1341 | 1094.5176 | 1117.3199 | 1157.5404 | 1184.6667 | 1195.0954 |
| 1224.4257 | 1239.8143 | 1258.4793 | 1278.7302 | 1313.1143 | 1338.2291 |
| 1378.8411 | 1386.9225 | 1415.4005 | 1421.3211 | 1444.0628 | 1447.8900 |
| 1458.0865 | 1463.5068 | 1549.8510 | 1813.5068 | 2955.8782 | 2960.6649 |
| 2970.3679 | 2978.2742 | 3001.5704 | 3012.0042 | 3031.9758 | 3037.3450 |
| 3037.5254 | 3043.3942 | 3150.7103 |           |           |           |

=====  
Structure 8  
=====

|            |           |           |           |           |           |
|------------|-----------|-----------|-----------|-----------|-----------|
| 1429.0904i | 34.1254   | 61.3769   | 85.9926   | 99.7548   | 146.6445  |
| 199.9248   | 241.0437  | 254.0302  | 309.4693  | 322.7501  | 388.3257  |
| 490.3570   | 534.8365  | 604.7363  | 656.8177  | 732.6735  | 823.9537  |
| 831.0430   | 868.9823  | 924.9618  | 994.0769  | 1041.8224 | 1061.1379 |
| 1074.6166  | 1101.8741 | 1136.9180 | 1161.0582 | 1191.1357 | 1211.7952 |
| 1227.6181  | 1233.6292 | 1262.7169 | 1288.9241 | 1304.2455 | 1334.9783 |
| 1368.6325  | 1379.8562 | 1418.2729 | 1423.1797 | 1441.6997 | 1447.2553 |
| 1455.3750  | 1461.3401 | 1547.7002 | 1813.2670 | 2952.5002 | 2959.6079 |
| 2970.2375  | 2982.5899 | 2989.3243 | 3020.1820 | 3035.8762 | 3038.3432 |
| 3045.0103  | 3052.3147 | 3151.5755 |           |           |           |

=====  
Structure 9  
=====

|            |           |           |           |           |           |
|------------|-----------|-----------|-----------|-----------|-----------|
| 1432.2833i | 33.9384   | 66.6577   | 86.4909   | 99.9780   | 148.0060  |
| 200.5609   | 241.5486  | 252.3750  | 301.7979  | 331.6122  | 390.6342  |
| 492.1122   | 536.6200  | 597.4459  | 655.5201  | 731.9478  | 825.5275  |
| 830.7781   | 867.4800  | 924.0616  | 994.7627  | 1041.7754 | 1059.0069 |
| 1075.3813  | 1101.8364 | 1136.2945 | 1160.9439 | 1191.4303 | 1213.3935 |
| 1228.6693  | 1234.1844 | 1263.1776 | 1288.3264 | 1302.9185 | 1336.3551 |
| 1368.7205  | 1379.4841 | 1418.2897 | 1422.0149 | 1441.7210 | 1447.4131 |
| 1455.3560  | 1461.4712 | 1550.7720 | 1812.7989 | 2953.1456 | 2959.9262 |
| 2970.4034  | 2982.1538 | 2989.5397 | 3020.5713 | 3036.4591 | 3037.4588 |
| 3044.6451  | 3051.0328 | 3150.5571 |           |           |           |

=====  
Structure 10  
=====

|            |          |          |           |           |           |
|------------|----------|----------|-----------|-----------|-----------|
| 1432.1569i | 25.7953  | 72.2133  | 73.6135   | 105.8514  | 115.0572  |
| 160.5019   | 235.7281 | 257.9426 | 309.6823  | 321.3138  | 367.2547  |
| 433.6755   | 537.0090 | 645.0612 | 710.7047  | 726.4323  | 774.1053  |
| 856.4201   | 891.7368 | 916.6608 | 1013.4140 | 1052.8385 | 1057.5374 |

|           |           |           |           |           |           |
|-----------|-----------|-----------|-----------|-----------|-----------|
| 1072.3182 | 1100.8488 | 1137.5207 | 1161.5492 | 1191.8167 | 1214.2724 |
| 1226.9566 | 1239.3237 | 1261.6596 | 1288.3424 | 1296.6293 | 1323.7725 |
| 1369.2309 | 1378.3173 | 1417.8418 | 1430.6507 | 1446.0256 | 1453.5581 |
| 1455.1292 | 1464.4869 | 1548.1014 | 1813.7169 | 2952.7869 | 2960.8953 |
| 2965.3829 | 2983.3537 | 2988.5961 | 3017.4120 | 3037.7606 | 3038.0878 |
| 3044.7853 | 3058.0974 | 3150.8445 |           |           |           |

=====  
Structure 11  
=====

|            |           |           |           |           |           |
|------------|-----------|-----------|-----------|-----------|-----------|
| 1432.2519i | 25.5401   | 69.7739   | 85.2478   | 101.2396  | 115.1502  |
| 160.6202   | 235.9169  | 252.4306  | 298.3039  | 337.9104  | 371.0057  |
| 431.8466   | 537.7473  | 637.7784  | 709.5997  | 724.9124  | 775.1547  |
| 855.8388   | 891.5649  | 915.5206  | 1015.2572 | 1053.7136 | 1058.0111 |
| 1072.3958  | 1101.2075 | 1137.4169 | 1161.6821 | 1192.0152 | 1213.9863 |
| 1227.5966  | 1238.8048 | 1261.5593 | 1288.4338 | 1296.6996 | 1324.0507 |
| 1369.7382  | 1378.3316 | 1418.2673 | 1429.2736 | 1445.9961 | 1453.4408 |
| 1455.1724  | 1464.4533 | 1549.6785 | 1813.6398 | 2952.8907 | 2960.5245 |
| 2963.7446  | 2981.5214 | 2988.8992 | 3017.0356 | 3037.6209 | 3037.6775 |
| 3044.8441  | 3057.1094 | 3150.8217 |           |           |           |

=====  
Structure 12  
=====

|            |           |           |           |           |           |
|------------|-----------|-----------|-----------|-----------|-----------|
| 1427.5244i | 37.2301   | 84.6476   | 105.8387  | 113.6786  | 153.2514  |
| 225.2246   | 263.6984  | 291.5523  | 317.5126  | 329.2653  | 396.2793  |
| 475.0165   | 535.1376  | 576.2169  | 668.6768  | 750.6132  | 804.2571  |
| 844.7624   | 908.4030  | 915.2978  | 969.1061  | 1057.8716 | 1063.2355 |
| 1077.8081  | 1082.8384 | 1119.0793 | 1155.6127 | 1184.4183 | 1204.6018 |
| 1222.9772  | 1231.0573 | 1247.3040 | 1272.4269 | 1334.6237 | 1345.3129 |
| 1373.2162  | 1381.9731 | 1414.9411 | 1423.4225 | 1438.4333 | 1445.1368 |
| 1454.6128  | 1466.5297 | 1553.5786 | 1810.4117 | 2952.9997 | 2960.4875 |
| 2971.3571  | 2978.6760 | 2998.2074 | 3024.5290 | 3032.5666 | 3034.4263 |
| 3038.6153  | 3049.4546 | 3152.4891 |           |           |           |

=====  
Structure 13  
=====

|            |           |           |           |           |           |
|------------|-----------|-----------|-----------|-----------|-----------|
| 1427.8944i | 28.7546   | 64.1911   | 92.0000   | 116.6337  | 158.9731  |
| 172.2102   | 258.8811  | 294.7657  | 326.6955  | 337.5307  | 414.9790  |
| 461.7589   | 535.1346  | 612.5849  | 687.3812  | 740.3829  | 817.1971  |
| 828.7644   | 880.1793  | 931.8839  | 960.4293  | 1038.8407 | 1063.5362 |
| 1073.4945  | 1100.4539 | 1128.5516 | 1156.3868 | 1173.2961 | 1210.7385 |
| 1218.0907  | 1233.3344 | 1265.0156 | 1281.7265 | 1321.0910 | 1339.3293 |
| 1357.0420  | 1380.8566 | 1418.3064 | 1428.3074 | 1443.6107 | 1449.3495 |

|           |           |           |           |           |           |
|-----------|-----------|-----------|-----------|-----------|-----------|
| 1458.2232 | 1469.6008 | 1547.5165 | 1811.1345 | 2954.6058 | 2960.0226 |
| 2970.3634 | 2996.0140 | 3001.1595 | 3023.0365 | 3036.8857 | 3038.2810 |
| 3048.8104 | 3067.1062 | 3151.7004 |           |           |           |

=====  
 Structure 14  
 =====

|            |           |           |           |           |           |
|------------|-----------|-----------|-----------|-----------|-----------|
| 1431.3228i | 31.4370   | 78.8709   | 96.1162   | 124.7886  | 145.0715  |
| 220.0717   | 262.4373  | 299.0966  | 316.9457  | 325.2191  | 394.1448  |
| 478.8721   | 537.4305  | 564.7295  | 667.2217  | 750.4403  | 803.6756  |
| 845.6300   | 907.4592  | 915.5679  | 970.6441  | 1053.9001 | 1064.0036 |
| 1079.7726  | 1083.3138 | 1119.5388 | 1156.1538 | 1187.0192 | 1204.5783 |
| 1225.2378  | 1232.0906 | 1248.7387 | 1272.3267 | 1334.8993 | 1345.8007 |
| 1374.9302  | 1381.6277 | 1414.0327 | 1422.0815 | 1438.1330 | 1445.8816 |
| 1456.2043  | 1465.1113 | 1551.6163 | 1810.8989 | 2953.1551 | 2960.2634 |
| 2971.4761  | 2978.9165 | 2998.8139 | 3023.3787 | 3030.4843 | 3034.3610 |
| 3038.4353  | 3049.6157 | 3151.7366 |           |           |           |

=====  
 Structure 15  
 =====

|            |           |           |           |           |           |
|------------|-----------|-----------|-----------|-----------|-----------|
| 1432.9750i | 24.6063   | 48.8863   | 92.2111   | 109.3230  | 159.4467  |
| 170.6496   | 257.5302  | 302.7119  | 305.9125  | 354.4659  | 415.4230  |
| 461.8826   | 536.8956  | 606.1310  | 684.6698  | 740.4360  | 817.8469  |
| 829.7840   | 878.2656  | 931.4282  | 961.4936  | 1038.3842 | 1061.9073 |
| 1072.6707  | 1099.8097 | 1129.3655 | 1157.4905 | 1173.2107 | 1214.3801 |
| 1218.3943  | 1234.6885 | 1265.3847 | 1282.2658 | 1321.2829 | 1340.6217 |
| 1356.4872  | 1380.3245 | 1418.5504 | 1428.1984 | 1443.2049 | 1448.7585 |
| 1457.6523  | 1469.2097 | 1549.7596 | 1811.2756 | 2955.6406 | 2960.1087 |
| 2970.4844  | 2995.3018 | 3001.2147 | 3022.9543 | 3037.0663 | 3037.2165 |
| 3047.2232  | 3066.6485 | 3150.4618 |           |           |           |

=====  
 Structure 16  
 =====

|            |           |           |           |           |           |
|------------|-----------|-----------|-----------|-----------|-----------|
| 1431.6351i | 25.0964   | 49.3646   | 82.7043   | 111.4783  | 116.3340  |
| 187.3885   | 228.8462  | 276.1138  | 307.3191  | 319.7150  | 407.8613  |
| 435.8760   | 536.8493  | 635.8440  | 725.6086  | 728.1853  | 769.4352  |
| 855.2461   | 877.4871  | 931.6419  | 964.6941  | 1054.9715 | 1072.0320 |
| 1074.6649  | 1090.2210 | 1136.4773 | 1161.0598 | 1183.4569 | 1213.2288 |
| 1228.9582  | 1240.5975 | 1266.5489 | 1279.1535 | 1309.4004 | 1337.0593 |
| 1360.3055  | 1380.1701 | 1417.7863 | 1430.4083 | 1444.9622 | 1450.1176 |
| 1458.6554  | 1463.5484 | 1548.0835 | 1813.3859 | 2959.4913 | 2961.6077 |
| 2969.1135  | 2990.7956 | 3001.5121 | 3017.5087 | 3037.7137 | 3038.5802 |
| 3044.3513  | 3057.9084 | 3150.7570 |           |           |           |

=====  
 Structure 17  
 =====

|            |           |           |           |           |           |
|------------|-----------|-----------|-----------|-----------|-----------|
| 1432.1011i | 25.8975   | 48.7952   | 95.9118   | 106.7230  | 115.1807  |
| 185.9799   | 225.2669  | 275.3079  | 296.9453  | 338.4578  | 408.1443  |
| 434.6766   | 537.9141  | 628.4991  | 724.4680  | 727.7382  | 769.9624  |
| 854.8423   | 877.2172  | 930.6352  | 966.3463  | 1055.3065 | 1071.9095 |
| 1075.0593  | 1090.8938 | 1136.7899 | 1161.6145 | 1183.4014 | 1212.9720 |
| 1229.9482  | 1240.1397 | 1266.5268 | 1279.6803 | 1308.7140 | 1337.1237 |
| 1360.7619  | 1380.3522 | 1418.2184 | 1429.2397 | 1445.0280 | 1449.8781 |
| 1458.6815  | 1463.7161 | 1549.3759 | 1813.2378 | 2959.1568 | 2961.8200 |
| 2967.9825  | 2989.2335 | 3001.0238 | 3016.6281 | 3037.5519 | 3038.8175 |
| 3044.6350  | 3056.6923 | 3150.6305 |           |           |           |

=====  
 Structure 18  
 =====

|            |           |           |           |           |           |
|------------|-----------|-----------|-----------|-----------|-----------|
| 1431.9554i | 26.1023   | 49.8141   | 79.1762   | 109.9327  | 120.8481  |
| 187.3772   | 229.3346  | 275.7551  | 309.5170  | 321.9124  | 413.6178  |
| 426.8371   | 536.8792  | 635.7873  | 711.7662  | 740.5608  | 777.4270  |
| 860.8477   | 876.0956  | 923.5034  | 966.5712  | 1050.8999 | 1068.9431 |
| 1077.2922  | 1093.5530 | 1135.5288 | 1160.9677 | 1181.7409 | 1215.2809 |
| 1231.5861  | 1241.8018 | 1256.1278 | 1290.0157 | 1307.4213 | 1337.2384 |
| 1361.0383  | 1380.3092 | 1417.8629 | 1431.2398 | 1444.0904 | 1450.1725 |
| 1458.8317  | 1463.3586 | 1547.2790 | 1813.3243 | 2957.5235 | 2962.4515 |
| 2964.4956  | 2983.6353 | 3001.7340 | 3021.1904 | 3037.7727 | 3039.3303 |
| 3044.9893  | 3068.6897 | 3150.8018 |           |           |           |

=====  
 Structure 19  
 =====

|            |           |           |           |           |           |
|------------|-----------|-----------|-----------|-----------|-----------|
| 1425.5278i | 57.9985   | 69.2374   | 103.0754  | 115.9369  | 169.8179  |
| 211.8026   | 265.3057  | 305.7872  | 319.6171  | 334.5259  | 398.8154  |
| 479.6743   | 535.6088  | 589.8674  | 659.6546  | 753.1857  | 801.9931  |
| 837.7880   | 875.8766  | 915.4170  | 971.8735  | 1043.8503 | 1059.6625 |
| 1078.0173  | 1091.6366 | 1135.8632 | 1159.3554 | 1193.1368 | 1212.0692 |
| 1224.4961  | 1235.6577 | 1264.1580 | 1277.6192 | 1336.0717 | 1339.3709 |
| 1359.1767  | 1381.5685 | 1417.4430 | 1418.9648 | 1440.6120 | 1445.4862 |
| 1457.1244  | 1468.7548 | 1551.1787 | 1808.5132 | 2955.6809 | 2964.1150 |
| 2970.3779  | 2977.9495 | 2998.4080 | 3022.0932 | 3037.7227 | 3042.2897 |
| 3045.2478  | 3046.8897 | 3151.1217 |           |           |           |

=====  
 Structure 20  
 =====

```

=====
1431.0998i    50.4981    60.1309    93.8985    103.9398    153.6099
 207.7888    263.6193    295.1582    312.3590    342.5997    399.7306
 477.4255    535.4389    584.6498    662.9195    753.7103    802.0610
 839.6408    875.5259    915.3936    971.8112   1043.7266   1061.4655
1078.5087   1091.8145   1135.7790   1160.8272   1192.9594   1212.6308
1224.9337   1234.7455   1265.6851   1278.2249   1336.3676   1339.4610
1359.0331   1381.8786   1417.1827   1419.1549   1440.9016   1446.3711
1457.6496   1471.2465   1551.7307   1808.6010   2956.6281   2962.5608
2971.5089   2978.7054   2999.1847   3022.5643   3037.2960   3041.1369
3044.1205   3045.5664   3150.4328

```

```

=====
                Structure 21
=====

```

```

1445.0128i    52.3261    74.4083    96.8476    129.0213    187.9027
 230.7997    242.4960    259.9022    280.0399    313.3010    411.0211
 527.7504    531.4600    572.0279    584.7957    712.7747    784.7859
 832.7408    879.3272    924.9239   1013.4520   1053.8890   1068.5677
1083.0505   1090.0302   1126.5866   1161.3476   1198.5727   1219.4851
1237.0348   1242.3435   1263.9459   1289.1131   1296.0624   1365.0338
1373.0460   1380.1852   1410.8501   1434.7332   1448.2965   1449.3062
1455.6489   1461.4423   1498.4503   1833.0281   2954.5364   2959.0635
2959.7397   2971.7891   3006.7710   3013.8642   3014.7665   3026.8556
3039.1039   3044.7288   3127.6692

```

```

=====
                Structure 22
=====

```

```

1445.5392i    58.4500    77.0305    101.9177    107.2764    140.1288
 186.9924    238.1905    249.7961    297.3229    311.4701    397.8121
 508.7279    537.0988    560.9854    591.4433    710.4844    786.0105
 841.0850    896.6852    910.8001   1027.5727   1065.5016   1068.0835
1084.7658   1092.2621   1122.0675   1160.6127   1197.2891   1207.0007
1242.3816   1243.9911   1269.6124   1278.1035   1289.3379   1343.1527
1378.2218   1387.7660   1413.4847   1443.2444   1447.5270   1451.0576
1455.1230   1464.1262   1497.4505   1835.0571   2948.2703   2955.4498
2961.9222   2981.0706   2983.4840   3003.5861   3014.9631   3030.5727
3039.6045   3045.0166   3127.5236

```

```

=====
                Structure 23
=====

```

```

1442.8857i    47.4584    72.1785    87.7883    123.6643    185.0745

```

|           |           |           |           |           |           |
|-----------|-----------|-----------|-----------|-----------|-----------|
| 232.7590  | 242.0057  | 247.8989  | 277.6042  | 316.0398  | 413.4728  |
| 510.9264  | 536.3130  | 569.5182  | 589.2522  | 711.6578  | 784.6495  |
| 832.3854  | 877.2577  | 923.9221  | 1015.5848 | 1054.2489 | 1065.6932 |
| 1082.4532 | 1089.2037 | 1126.0988 | 1158.4408 | 1200.2396 | 1211.9047 |
| 1242.1194 | 1243.1916 | 1260.0577 | 1288.1486 | 1294.7938 | 1365.8106 |
| 1371.5969 | 1379.0831 | 1408.4922 | 1435.1083 | 1447.7196 | 1449.4683 |
| 1455.6006 | 1461.4328 | 1501.6129 | 1833.3206 | 2950.8728 | 2958.9619 |
| 2962.1621 | 2969.4426 | 3007.4696 | 3011.5593 | 3016.5254 | 3024.7152 |
| 3039.0212 | 3044.5238 | 3127.8488 |           |           |           |

=====

Structure 24

=====

|            |           |           |           |           |           |
|------------|-----------|-----------|-----------|-----------|-----------|
| 1440.2771i | 49.7938   | 53.8543   | 103.9288  | 145.6645  | 192.2800  |
| 218.6909   | 261.4298  | 267.7222  | 312.1011  | 350.3263  | 415.5844  |
| 514.0741   | 534.0832  | 566.2541  | 583.1340  | 724.4305  | 787.5572  |
| 821.0810   | 881.4247  | 929.8938  | 974.0812  | 1058.9119 | 1070.7955 |
| 1076.6690  | 1086.2228 | 1127.7082 | 1161.4924 | 1183.9538 | 1213.9815 |
| 1229.7668  | 1240.6890 | 1261.7725 | 1284.1762 | 1328.2835 | 1356.4668 |
| 1373.4804  | 1380.4941 | 1413.4361 | 1432.8421 | 1447.7963 | 1450.1646 |
| 1458.6007  | 1465.3535 | 1496.4202 | 1832.3408 | 2956.5788 | 2961.6122 |
| 2972.0160  | 2976.4558 | 3014.2963 | 3014.5318 | 3022.8923 | 3036.5084 |
| 3037.5249  | 3042.1992 | 3127.7097 |           |           |           |

=====

Structure 25

=====

|            |           |           |           |           |           |
|------------|-----------|-----------|-----------|-----------|-----------|
| 1444.7614i | 43.3549   | 78.1192   | 102.3414  | 121.1947  | 142.7535  |
| 191.8763   | 243.6833  | 270.5812  | 301.4094  | 327.4600  | 425.7361  |
| 492.3064   | 535.1278  | 558.2205  | 593.6375  | 727.8419  | 781.2448  |
| 844.9908   | 878.8201  | 922.8196  | 978.7424  | 1066.8550 | 1071.8463 |
| 1088.0181  | 1094.5650 | 1116.4638 | 1161.0072 | 1186.2698 | 1208.9255 |
| 1242.7596  | 1248.6080 | 1260.1802 | 1286.5749 | 1311.3692 | 1338.4157 |
| 1379.4232  | 1384.1298 | 1414.0613 | 1443.2113 | 1446.3888 | 1449.0623 |
| 1458.0148  | 1463.2544 | 1496.8454 | 1835.0228 | 2953.9021 | 2954.9653 |
| 2961.0143  | 2980.7179 | 3002.4461 | 3012.6195 | 3014.7537 | 3036.4859 |
| 3037.3461  | 3043.5387 | 3127.3643 |           |           |           |

=====

Structure 26

=====

|            |          |          |          |           |           |
|------------|----------|----------|----------|-----------|-----------|
| 1444.2776i | 42.9740  | 82.7937  | 101.1376 | 116.7991  | 147.7942  |
| 190.4375   | 244.5876 | 271.5455 | 298.2394 | 327.4438  | 426.3147  |
| 490.7541   | 537.5026 | 557.2233 | 593.8521 | 728.2230  | 780.4369  |
| 844.8942   | 879.1049 | 923.3586 | 978.7289 | 1067.0103 | 1071.4952 |



|           |           |           |           |           |           |
|-----------|-----------|-----------|-----------|-----------|-----------|
| 1087.2077 | 1094.8868 | 1117.2154 | 1160.6530 | 1185.6848 | 1208.9792 |
| 1242.6493 | 1245.2589 | 1264.5652 | 1287.4916 | 1311.2502 | 1338.0075 |
| 1378.6601 | 1383.7168 | 1414.1617 | 1443.0795 | 1446.2907 | 1448.5979 |
| 1457.9120 | 1463.3695 | 1497.5686 | 1834.6675 | 2957.0307 | 2959.2939 |
| 2963.2016 | 2982.6102 | 3002.6671 | 3005.3278 | 3014.7600 | 3034.0364 |
| 3036.3202 | 3043.1922 | 3127.3661 |           |           |           |

=====  
Structure 27  
=====

|            |           |           |           |           |           |
|------------|-----------|-----------|-----------|-----------|-----------|
| 1443.4203i | 46.7458   | 47.1280   | 90.9657   | 137.7836  | 184.9237  |
| 217.6397   | 246.4384  | 268.0288  | 312.8503  | 350.9908  | 415.2111  |
| 501.3107   | 529.8226  | 562.9045  | 585.6565  | 724.9427  | 786.1044  |
| 821.3156   | 880.1045  | 927.3501  | 975.6011  | 1057.9494 | 1066.7186 |
| 1078.0069  | 1086.1032 | 1127.3651 | 1158.5517 | 1182.7330 | 1210.2027 |
| 1233.9565  | 1241.9669 | 1259.5548 | 1287.6948 | 1327.5620 | 1357.7813 |
| 1371.9049  | 1378.9640 | 1410.5780 | 1433.0415 | 1448.0461 | 1449.8985 |
| 1458.5314  | 1463.6488 | 1500.9853 | 1832.7471 | 2957.3813 | 2966.8375 |
| 2974.1809  | 2978.4340 | 3012.8110 | 3016.8119 | 3016.8529 | 3029.7069 |
| 3039.1527  | 3042.1040 | 3127.5262 |           |           |           |

=====  
Structure 28  
=====

|            |           |           |           |           |           |
|------------|-----------|-----------|-----------|-----------|-----------|
| 1441.1455i | 43.7131   | 86.2369   | 117.9154  | 123.7435  | 196.3160  |
| 228.3799   | 265.3782  | 290.3561  | 315.0280  | 319.4105  | 426.3611  |
| 513.4063   | 528.7601  | 564.0201  | 584.5176  | 743.4689  | 778.0420  |
| 828.9441   | 890.4520  | 921.1228  | 977.6765  | 1066.2989 | 1072.2962 |
| 1085.2259  | 1087.3566 | 1115.7981 | 1161.2458 | 1197.4134 | 1215.4072 |
| 1231.0045  | 1239.7106 | 1262.8568 | 1272.9039 | 1334.8608 | 1344.6709 |
| 1375.3238  | 1384.4660 | 1411.0287 | 1437.7034 | 1444.2161 | 1447.4980 |
| 1455.4433  | 1464.3137 | 1497.6456 | 1833.8563 | 2950.8067 | 2959.5093 |
| 2961.2967  | 2981.6866 | 2998.7111 | 3013.8078 | 3016.8281 | 3033.2923 |
| 3035.6788  | 3054.2904 | 3127.4099 |           |           |           |

=====  
Structure 29  
=====

|            |           |           |           |           |           |
|------------|-----------|-----------|-----------|-----------|-----------|
| 1442.2906i | 50.7156   | 73.3114   | 93.1633   | 120.6264  | 151.2308  |
| 181.4410   | 235.8501  | 258.5275  | 297.7616  | 347.9028  | 375.2677  |
| 464.6492   | 547.7671  | 591.6688  | 701.1450  | 711.8553  | 771.9129  |
| 826.8581   | 894.8709  | 915.2380  | 1008.0810 | 1054.1567 | 1057.1792 |
| 1072.3399  | 1099.4896 | 1148.5586 | 1162.4779 | 1192.8840 | 1222.2998 |
| 1239.5579  | 1245.3923 | 1260.3779 | 1285.1095 | 1296.5921 | 1324.4246 |
| 1367.0855  | 1378.7788 | 1437.9705 | 1445.4406 | 1454.6196 | 1455.5888 |

|           |           |           |           |           |           |
|-----------|-----------|-----------|-----------|-----------|-----------|
| 1457.2975 | 1465.5235 | 1500.2203 | 1831.2309 | 2952.7082 | 2959.0043 |
| 2962.1870 | 2989.8636 | 3003.4260 | 3013.0948 | 3015.7098 | 3038.7028 |
| 3046.8935 | 3060.6867 | 3127.4736 |           |           |           |

=====

Structure 30

=====

|            |           |           |           |           |           |
|------------|-----------|-----------|-----------|-----------|-----------|
| 1443.1158i | 40.7934   | 80.9820   | 110.5590  | 123.5514  | 184.2864  |
| 223.0936   | 256.6910  | 296.9224  | 312.8836  | 321.7188  | 428.0233  |
| 501.2087   | 529.6674  | 561.8245  | 575.3515  | 744.2839  | 775.8258  |
| 830.5575   | 888.5166  | 921.7800  | 978.9784  | 1065.3893 | 1068.9754 |
| 1085.2559  | 1087.3868 | 1113.8565 | 1157.9976 | 1199.5250 | 1209.9086 |
| 1237.4901  | 1242.4221 | 1257.2649 | 1274.3459 | 1335.1873 | 1346.3980 |
| 1373.1154  | 1384.7611 | 1407.1689 | 1436.3439 | 1443.6108 | 1448.4628 |
| 1455.0137  | 1460.6587 | 1501.7973 | 1834.9546 | 2947.7861 | 2962.3531 |
| 2964.9358  | 2980.1957 | 2998.0257 | 3009.7038 | 3016.5331 | 3033.3817 |
| 3036.6127  | 3056.6648 | 3127.2392 |           |           |           |

=====

Structure 31

=====

|            |           |           |           |           |           |
|------------|-----------|-----------|-----------|-----------|-----------|
| 1441.3157i | 53.2939   | 87.9065   | 105.4456  | 142.9977  | 172.0348  |
| 182.3185   | 250.5417  | 296.5853  | 317.6785  | 354.4577  | 433.9182  |
| 474.8185   | 541.4969  | 577.3510  | 704.3494  | 710.9911  | 776.6026  |
| 816.3890   | 882.8625  | 931.4199  | 960.4579  | 1046.0119 | 1067.9778 |
| 1072.9898  | 1101.1673 | 1125.1251 | 1161.9015 | 1182.9400 | 1215.6396 |
| 1233.8491  | 1245.3526 | 1265.7842 | 1285.3633 | 1318.1759 | 1335.6232 |
| 1360.2355  | 1379.8914 | 1437.9536 | 1443.0814 | 1445.5012 | 1454.7320 |
| 1457.1887  | 1474.2628 | 1501.9382 | 1825.3760 | 2959.0800 | 2961.0779 |
| 2969.7181  | 3001.3036 | 3010.4186 | 3017.5372 | 3020.0484 | 3037.6522 |
| 3053.0941  | 3067.6738 | 3129.4547 |           |           |           |

=====

Structure 32

=====

|            |           |           |           |           |           |
|------------|-----------|-----------|-----------|-----------|-----------|
| 1440.6338i | 53.2996   | 65.9922   | 99.6029   | 108.3462  | 175.2573  |
| 195.4111   | 236.5754  | 248.4307  | 297.2377  | 349.6214  | 419.2359  |
| 467.2133   | 541.3361  | 576.6640  | 694.3714  | 724.4131  | 767.7877  |
| 824.4528   | 875.3860  | 928.9811  | 995.2620  | 1039.5250 | 1060.8501 |
| 1072.7135  | 1098.5949 | 1144.4677 | 1162.4279 | 1190.7040 | 1216.8602 |
| 1234.6661  | 1245.9653 | 1265.8612 | 1286.8109 | 1304.7706 | 1327.7098 |
| 1369.9037  | 1380.9626 | 1441.4051 | 1443.2625 | 1448.3994 | 1455.7977 |
| 1455.9811  | 1463.3631 | 1500.0183 | 1828.8517 | 2954.4110 | 2958.9607 |
| 2970.6659  | 2994.0208 | 3008.2440 | 3017.1777 | 3019.7295 | 3037.1925 |
| 3046.4184  | 3062.2374 | 3129.0737 |           |           |           |

=====  
 Structure 33  
 =====

|            |           |           |           |           |           |
|------------|-----------|-----------|-----------|-----------|-----------|
| 1424.1836i | 20.8965   | 71.9649   | 93.3086   | 123.0423  | 136.8922  |
| 198.6354   | 236.1941  | 263.6900  | 300.2134  | 336.5078  | 390.5161  |
| 465.2592   | 550.3106  | 592.5403  | 694.0691  | 712.1507  | 771.2932  |
| 827.5307   | 896.8301  | 914.1119  | 1009.7024 | 1056.1347 | 1061.3842 |
| 1071.0708  | 1100.2500 | 1142.2743 | 1160.7217 | 1195.3393 | 1219.8404 |
| 1237.7559  | 1247.3667 | 1258.8235 | 1282.7455 | 1295.6847 | 1329.3240 |
| 1366.8533  | 1378.1174 | 1443.8499 | 1445.4008 | 1447.5963 | 1455.0656 |
| 1455.2340  | 1464.1632 | 1511.4249 | 1829.1646 | 2951.6108 | 2961.7851 |
| 2965.4598  | 2988.4125 | 3002.3902 | 3009.2106 | 3019.7001 | 3039.4081 |
| 3045.6037  | 3062.7762 | 3124.4495 |           |           |           |

=====  
 Structure 34  
 =====

|            |           |           |           |           |           |
|------------|-----------|-----------|-----------|-----------|-----------|
| 1441.3353i | 33.8100   | 63.0131   | 95.2917   | 134.4007  | 167.6378  |
| 187.6571   | 227.9017  | 277.8975  | 296.2793  | 345.0406  | 418.1471  |
| 466.5409   | 546.7776  | 590.4041  | 691.1838  | 724.1436  | 772.1733  |
| 826.2971   | 880.7191  | 930.8276  | 959.7121  | 1061.5776 | 1071.5342 |
| 1073.0834  | 1087.0166 | 1143.6781 | 1162.3578 | 1185.2857 | 1222.7459 |
| 1242.2933  | 1245.4836 | 1265.6804 | 1274.3057 | 1312.3497 | 1335.5571 |
| 1357.7689  | 1380.1123 | 1436.2106 | 1444.2899 | 1451.0634 | 1458.4977 |
| 1461.3525  | 1463.3156 | 1499.7910 | 1831.0758 | 2955.6644 | 2960.2238 |
| 2963.3386  | 3005.0984 | 3008.7427 | 3014.7710 | 3016.7214 | 3036.8189 |
| 3046.2325  | 3065.9728 | 3127.3394 |           |           |           |

=====  
 Structure 35  
 =====

|            |           |           |           |           |           |
|------------|-----------|-----------|-----------|-----------|-----------|
| 1442.3655i | 42.0735   | 62.6441   | 104.6598  | 125.8920  | 167.2767  |
| 184.8962   | 226.7674  | 281.3699  | 297.6214  | 348.7734  | 414.3843  |
| 466.1267   | 547.9224  | 589.4678  | 691.8976  | 723.4553  | 773.9649  |
| 835.2447   | 879.0510  | 922.0610  | 961.8324  | 1056.0205 | 1071.6685 |
| 1072.8400  | 1089.8947 | 1143.6269 | 1162.5190 | 1186.2229 | 1226.7339 |
| 1239.2229  | 1246.3397 | 1258.2162 | 1286.4227 | 1307.4977 | 1336.9131 |
| 1357.0424  | 1381.3019 | 1436.3926 | 1444.4003 | 1451.1751 | 1458.4596 |
| 1460.8131  | 1463.8090 | 1499.7811 | 1831.0340 | 2956.2743 | 2963.6476 |
| 2964.4262  | 3000.1105 | 3003.4855 | 3012.7239 | 3015.6873 | 3041.6060 |
| 3046.9069  | 3068.4273 | 3127.2050 |           |           |           |

=====  
 Structure 36  
 =====

```

=====
1448.8498i    30.5068    96.3788    104.9308    141.0089    179.3994
 211.8075    250.7734    318.2254    331.1104    345.0517    436.8703
 465.2952    547.6853    563.9288    696.5561    711.7830    772.5761
 815.3035    880.4751    932.3727    959.3540   1045.1432   1062.2271
1073.6033    1103.3391   1126.2777   1160.9344   1192.3536   1214.6725
1239.6562    1242.5702   1273.6821   1291.2976   1316.9400   1338.5389
1357.1105    1381.3918   1432.3412   1446.2162   1446.8819   1458.3168
1459.5651    1472.7446   1489.6666   1822.0398   2958.0965   2960.9692
2972.9309    2992.1388   3004.0412   3021.8543   3026.9194   3037.5383
3053.0123    3062.8973   3126.1730

```

```

=====
Structure 37
=====

```

```

1448.3625i    39.4833    85.9570    99.5454    124.6681    208.1416
 225.2328    250.6715    266.6523    324.4501    334.6121    416.3051
 467.4657    551.2259    566.1767    686.5017    720.4720    759.8270
 823.5202    876.3975    926.0086    993.7358   1042.7462   1058.4317
1072.3953    1103.6302   1147.2434   1162.5152   1198.9734   1222.0629
1240.7040    1242.4030   1276.4111   1291.2691   1310.7302   1324.6669
1369.2894    1381.4368   1431.0839   1443.3296   1451.1115   1455.4942
1457.8728    1463.8489   1484.7014   1825.9391   2955.7997   2958.9260
2975.4918    2985.8698   2995.1582   3019.5898   3022.5329   3035.3647
3047.0970    3059.3730   3124.7337

```

```

=====
Structure 38
=====

```

```

1454.3928i    58.3701    66.0296    93.6030    119.6545    139.2989
 190.6354    235.0781    258.1327    321.6209    350.6773    367.5865
 459.0727    545.8802    582.3382    695.4756    710.3885    770.1219
 822.1006    894.6617    915.0993   1010.5777   1052.1161   1055.6385
1067.8523    1099.5622   1150.5859   1160.2775   1198.1439   1227.7967
1244.1341    1246.4761   1266.8434   1291.7999   1303.2164   1321.7260
1369.4740    1379.1299   1431.9341   1445.5968   1453.2625   1455.3331
1461.3183    1465.9960   1487.2677   1826.7748   2952.8832   2962.3587
2972.2542    2987.2508   2989.6493   3021.1319   3022.6753   3039.7281
3046.6107    3056.6477   3125.6994

```

```

=====
Structure 39
=====

```

```

1424.2308i    44.3739    80.8877    98.4331    144.5150    180.4815

```

|           |           |           |           |           |           |
|-----------|-----------|-----------|-----------|-----------|-----------|
| 190.6727  | 247.8238  | 301.2987  | 326.7391  | 360.8890  | 433.9957  |
| 471.4941  | 545.8705  | 580.6406  | 707.2572  | 711.3210  | 775.5787  |
| 817.0190  | 882.4637  | 928.8843  | 958.7791  | 1047.7985 | 1057.6719 |
| 1072.3830 | 1101.1461 | 1123.4851 | 1158.9613 | 1182.7245 | 1215.5082 |
| 1235.0217 | 1255.7261 | 1265.8124 | 1284.5594 | 1316.8549 | 1333.7415 |
| 1362.3678 | 1378.4817 | 1437.4132 | 1444.9267 | 1446.2839 | 1452.4347 |
| 1455.3420 | 1473.0227 | 1512.7468 | 1825.7565 | 2958.0879 | 2965.7117 |
| 2972.0058 | 3006.2970 | 3008.2527 | 3012.8148 | 3022.7258 | 3036.9225 |
| 3051.5154 | 3067.1914 | 3123.1642 |           |           |           |

=====

Structure 40

=====

|            |           |           |           |           |           |
|------------|-----------|-----------|-----------|-----------|-----------|
| 1426.6394i | 40.7876   | 62.3184   | 99.3211   | 103.7139  | 182.1280  |
| 195.1884   | 236.0320  | 248.7335  | 304.1610  | 360.0571  | 419.7760  |
| 464.5366   | 545.5903  | 580.0319  | 699.2079  | 727.2714  | 767.1748  |
| 824.1130   | 874.2189  | 926.9853  | 994.4532  | 1040.0580 | 1054.8156 |
| 1065.3760  | 1097.5115 | 1142.4725 | 1160.4455 | 1190.6843 | 1215.5627 |
| 1236.4300  | 1258.1431 | 1266.7993 | 1284.9086 | 1302.3277 | 1325.3680 |
| 1369.5775  | 1380.1010 | 1441.1689 | 1445.2193 | 1449.4710 | 1451.1453 |
| 1455.6914  | 1463.9747 | 1510.7013 | 1829.4235 | 2958.3911 | 2961.2744 |
| 2969.2017  | 2998.8480 | 3005.6470 | 3010.8308 | 3020.5893 | 3039.0320 |
| 3045.3303  | 3063.6359 | 3122.3772 |           |           |           |

=====

Structure 41

=====

|            |           |           |           |           |           |
|------------|-----------|-----------|-----------|-----------|-----------|
| 1454.4841i | 40.5374   | 70.6904   | 94.5282   | 119.9962  | 165.4848  |
| 190.6479   | 226.7636  | 278.8558  | 321.8122  | 347.8950  | 413.2107  |
| 459.6541   | 545.5131  | 578.0471  | 686.3607  | 720.7845  | 772.7767  |
| 830.7724   | 878.2602  | 921.7451  | 964.7448  | 1052.3146 | 1066.3032 |
| 1074.0894  | 1090.4882 | 1143.9790 | 1159.9890 | 1192.6653 | 1234.6380 |
| 1244.0605  | 1244.5230 | 1268.5377 | 1290.3044 | 1308.8549 | 1339.5971 |
| 1359.7528  | 1381.8389 | 1431.3270 | 1443.9121 | 1449.4537 | 1458.8417 |
| 1463.6138  | 1465.1672 | 1485.8077 | 1826.5710 | 2955.9329 | 2963.9708 |
| 2972.3175  | 2986.2006 | 3003.1775 | 3023.1164 | 3025.3933 | 3041.1766 |
| 3046.3124  | 3067.6630 | 3125.6520 |           |           |           |

=====

Structure 42

=====

|            |          |          |          |           |           |
|------------|----------|----------|----------|-----------|-----------|
| 1442.2591i | 46.9620  | 85.1585  | 101.4338 | 130.7531  | 169.3146  |
| 186.0967   | 217.1559 | 290.3829 | 325.1504 | 346.7501  | 402.1992  |
| 466.9313   | 537.6409 | 575.2194 | 692.7587 | 730.0795  | 762.2063  |
| 820.8550   | 894.5054 | 933.0753 | 966.9491 | 1049.6688 | 1070.4498 |

|           |           |           |           |           |           |
|-----------|-----------|-----------|-----------|-----------|-----------|
| 1077.4892 | 1077.9753 | 1141.5794 | 1161.2656 | 1192.5100 | 1212.1905 |
| 1237.1043 | 1244.5853 | 1263.5645 | 1281.4651 | 1320.9194 | 1332.8472 |
| 1359.8654 | 1383.0289 | 1439.3690 | 1441.4261 | 1447.2773 | 1452.2898 |
| 1459.3453 | 1462.3915 | 1501.3427 | 1826.2802 | 2963.0134 | 2964.4091 |
| 2968.6028 | 3001.1918 | 3011.0839 | 3015.7773 | 3023.8958 | 3039.6811 |
| 3059.4456 | 3060.9481 | 3131.4350 |           |           |           |

=====  
Structure 43  
=====

|            |           |           |           |           |           |
|------------|-----------|-----------|-----------|-----------|-----------|
| 1445.2133i | 39.6166   | 94.0556   | 97.2543   | 134.6149  | 165.8798  |
| 214.8292   | 227.0418  | 277.0872  | 310.2306  | 346.3362  | 430.9259  |
| 451.0911   | 538.9495  | 573.9450  | 688.7741  | 752.6084  | 769.7534  |
| 815.1332   | 886.8881  | 932.8776  | 962.4059  | 1056.4884 | 1073.0050 |
| 1078.0115  | 1079.9139 | 1142.4835 | 1162.3376 | 1188.1956 | 1216.5847 |
| 1232.8919  | 1248.1403 | 1267.6547 | 1271.6549 | 1324.2850 | 1332.9878 |
| 1349.2418  | 1388.3277 | 1440.4037 | 1443.5229 | 1449.3455 | 1451.9516 |
| 1462.8098  | 1463.1207 | 1494.7143 | 1831.6506 | 2956.7555 | 2958.0203 |
| 2964.4119  | 2997.7150 | 3000.6966 | 3013.6090 | 3022.3535 | 3039.8235 |
| 3056.6574  | 3057.2732 | 3129.8396 |           |           |           |

=====  
Structure 44  
=====

|            |           |           |           |           |           |
|------------|-----------|-----------|-----------|-----------|-----------|
| 1447.5740i | 52.5075   | 71.4775   | 104.0190  | 131.3872  | 179.1701  |
| 195.8982   | 221.6319  | 319.4147  | 335.2496  | 349.3765  | 408.2578  |
| 463.2520   | 541.5752  | 562.1848  | 684.1538  | 730.1328  | 759.5509  |
| 818.4700   | 892.0873  | 928.6281  | 968.6139  | 1047.8767 | 1057.9004 |
| 1074.2590  | 1080.4859 | 1143.5141 | 1159.1068 | 1198.2013 | 1214.1138 |
| 1240.7472  | 1246.9193 | 1268.9807 | 1291.4296 | 1325.5730 | 1334.7357 |
| 1359.1071  | 1385.0536 | 1432.3288 | 1442.0114 | 1449.9976 | 1456.0981 |
| 1461.0880  | 1462.8386 | 1495.5044 | 1823.4112 | 2963.9487 | 2967.8335 |
| 2974.1439  | 2990.0097 | 3007.2957 | 3019.0791 | 3023.4253 | 3042.6354 |
| 3056.2943  | 3056.9853 | 3126.0401 |           |           |           |

=====  
Structure 45  
=====

|            |           |           |           |           |           |
|------------|-----------|-----------|-----------|-----------|-----------|
| 1426.1082i | 42.1833   | 67.7873   | 97.6731   | 130.8057  | 167.9358  |
| 185.6836   | 212.7996  | 294.1435  | 338.0287  | 364.6335  | 398.7783  |
| 463.4064   | 545.1845  | 580.3265  | 700.0757  | 726.0080  | 763.1531  |
| 819.7225   | 895.8297  | 934.2374  | 966.5407  | 1045.7347 | 1055.9920 |
| 1077.4621  | 1080.1328 | 1140.7478 | 1159.1371 | 1191.2675 | 1211.1690 |
| 1239.4936  | 1259.5815 | 1266.4400 | 1279.7845 | 1316.6529 | 1331.7694 |
| 1360.3188  | 1382.1391 | 1439.1343 | 1443.2210 | 1449.4868 | 1450.5336 |

|           |           |           |           |           |           |
|-----------|-----------|-----------|-----------|-----------|-----------|
| 1458.9771 | 1460.8610 | 1515.0586 | 1827.8778 | 2965.0362 | 2967.3332 |
| 2973.7959 | 3001.5318 | 3006.8026 | 3010.4456 | 3021.6563 | 3039.8650 |
| 3059.6956 | 3060.4278 | 3122.6345 |           |           |           |

=====

Structure 46

=====

|            |           |           |           |           |           |
|------------|-----------|-----------|-----------|-----------|-----------|
| 1436.0213i | 30.1086   | 81.7569   | 90.9805   | 115.5734  | 179.4596  |
| 221.0890   | 223.4554  | 275.1404  | 326.4228  | 371.5490  | 434.0150  |
| 449.4729   | 547.7060  | 578.1596  | 694.4925  | 750.4111  | 766.5255  |
| 811.1886   | 883.4568  | 929.7329  | 960.8000  | 1042.2609 | 1057.3709 |
| 1078.4902  | 1081.7745 | 1142.3896 | 1160.3378 | 1187.9079 | 1213.7905 |
| 1237.3087  | 1264.9481 | 1269.7154 | 1279.4035 | 1319.7860 | 1334.1927 |
| 1349.8732  | 1387.3234 | 1437.9408 | 1442.3533 | 1446.7642 | 1449.9894 |
| 1460.1667  | 1463.4970 | 1507.1998 | 1834.8023 | 2954.5385 | 2964.5222 |
| 2969.5197  | 2997.4531 | 2998.9944 | 3002.6822 | 3022.8381 | 3038.7840 |
| 3055.1281  | 3058.5438 | 3120.1683 |           |           |           |

### S.3.3 $(TS_\alpha)^\ddagger$

=====

Structure 1

=====

|            |           |           |           |           |           |
|------------|-----------|-----------|-----------|-----------|-----------|
| 1439.7402i | 49.0526   | 72.0542   | 87.4168   | 134.1456  | 163.8489  |
| 187.1222   | 212.0895  | 238.5742  | 283.0977  | 295.8508  | 334.6258  |
| 397.0623   | 509.1733  | 641.9796  | 680.1567  | 729.0732  | 831.9210  |
| 849.1406   | 901.6377  | 928.7807  | 1006.8644 | 1039.3983 | 1051.9817 |
| 1071.7159  | 1113.9065 | 1146.8967 | 1159.8192 | 1173.5804 | 1211.8933 |
| 1228.2944  | 1245.6476 | 1269.2008 | 1289.7171 | 1339.4728 | 1372.1432 |
| 1375.0631  | 1386.7692 | 1432.4764 | 1440.6750 | 1442.1853 | 1447.0282 |
| 1453.2607  | 1456.1171 | 1459.1628 | 1776.9752 | 2955.0747 | 2957.0433 |
| 2967.8685  | 2984.1746 | 2999.9482 | 3022.3078 | 3036.1628 | 3041.3895 |
| 3053.3433  | 3067.2190 | 3101.0593 |           |           |           |

=====

Structure 2

=====

|            |           |           |           |           |           |
|------------|-----------|-----------|-----------|-----------|-----------|
| 1445.1558i | 49.3366   | 65.1183   | 95.8974   | 113.7884  | 135.5488  |
| 170.3706   | 236.1988  | 244.3815  | 297.9026  | 311.2737  | 327.2940  |
| 336.4667   | 486.6713  | 677.7871  | 701.6567  | 711.3470  | 802.2679  |
| 881.4943   | 905.4977  | 922.7067  | 1012.4330 | 1045.9767 | 1059.7838 |
| 1074.0215  | 1114.6595 | 1147.0237 | 1165.0808 | 1172.6179 | 1200.8894 |
| 1228.0001  | 1228.4208 | 1268.2255 | 1279.3192 | 1345.9570 | 1360.9372 |
| 1377.1076  | 1394.4018 | 1431.6599 | 1441.2557 | 1441.9781 | 1447.3444 |

|           |           |           |           |           |           |
|-----------|-----------|-----------|-----------|-----------|-----------|
| 1453.5602 | 1456.2239 | 1461.2175 | 1779.7090 | 2941.9223 | 2953.2932 |
| 2958.2575 | 2983.9807 | 2988.2454 | 3012.4611 | 3034.9156 | 3042.0900 |
| 3052.4344 | 3067.0132 | 3100.6856 |           |           |           |

=====

Structure 3

=====

|            |           |           |           |           |           |
|------------|-----------|-----------|-----------|-----------|-----------|
| 1440.0916i | 44.3377   | 55.2696   | 109.0536  | 136.0711  | 165.3484  |
| 181.9039   | 213.3897  | 256.9138  | 287.8788  | 323.6855  | 341.3863  |
| 425.8751   | 483.3224  | 643.9658  | 685.1941  | 738.9897  | 828.4977  |
| 839.2501   | 898.2388  | 942.8925  | 972.8534  | 1038.6126 | 1057.2392 |
| 1065.1703  | 1116.2599 | 1140.6437 | 1146.9990 | 1173.3810 | 1207.8829 |
| 1233.0807  | 1240.9745 | 1265.3158 | 1315.5094 | 1330.9980 | 1367.3209 |
| 1376.8911  | 1388.7257 | 1431.2527 | 1440.5225 | 1442.0905 | 1447.9461 |
| 1455.5025  | 1456.1356 | 1460.3817 | 1776.7579 | 2956.1869 | 2967.0960 |
| 2968.7075  | 2984.0712 | 3008.1068 | 3026.1027 | 3034.4325 | 3039.7266 |
| 3063.7864  | 3067.0824 | 3100.9959 |           |           |           |

=====

Structure 4

=====

|            |           |           |           |           |           |
|------------|-----------|-----------|-----------|-----------|-----------|
| 1433.3626i | 46.6092   | 78.2988   | 108.6432  | 136.0846  | 161.8532  |
| 200.5770   | 223.9765  | 282.7411  | 287.3571  | 304.9315  | 342.2402  |
| 425.6560   | 479.0853  | 644.0493  | 687.2490  | 753.5507  | 817.8086  |
| 854.0619   | 903.7830  | 926.6437  | 975.1250  | 1040.8006 | 1060.4932 |
| 1070.0970  | 1108.5217 | 1146.9269 | 1158.3696 | 1172.5849 | 1205.4904 |
| 1235.8792  | 1244.8853 | 1257.8523 | 1313.7490 | 1334.6356 | 1359.6308 |
| 1381.4908  | 1387.7191 | 1433.4374 | 1439.1708 | 1441.8926 | 1444.4198 |
| 1453.1744  | 1456.1050 | 1460.2510 | 1778.9418 | 2953.0477 | 2959.2847 |
| 2970.7029  | 2984.1471 | 2996.0776 | 3024.0012 | 3033.9461 | 3046.8584 |
| 3048.8574  | 3067.2757 | 3100.9041 |           |           |           |

=====

Structure 5

=====

|            |           |           |           |           |           |
|------------|-----------|-----------|-----------|-----------|-----------|
| 1445.5661i | 31.5706   | 60.3453   | 96.2693   | 128.8428  | 142.3301  |
| 173.0989   | 233.1042  | 267.1956  | 295.0666  | 308.4332  | 332.8467  |
| 407.4080   | 458.1933  | 669.9299  | 699.9282  | 739.9817  | 801.4270  |
| 866.2916   | 900.0825  | 931.9830  | 975.8667  | 1042.3469 | 1065.6412 |
| 1077.0781  | 1107.9003 | 1146.9626 | 1157.4792 | 1172.0420 | 1204.5883 |
| 1225.1938  | 1231.4905 | 1262.1026 | 1314.2948 | 1332.6062 | 1357.4100 |
| 1377.9791  | 1392.8206 | 1431.7987 | 1441.4810 | 1441.8531 | 1444.7075 |
| 1454.8567  | 1456.2080 | 1461.7567 | 1779.5679 | 2938.8379 | 2957.1362 |
| 2961.4275  | 2983.9699 | 3002.8258 | 3022.3864 | 3033.7128 | 3040.5166 |
| 3065.3151  | 3067.0115 | 3100.6913 |           |           |           |



=====  
 Structure 6  
 =====

|            |           |           |           |           |           |
|------------|-----------|-----------|-----------|-----------|-----------|
| 1440.8715i | 51.2818   | 67.3544   | 89.2526   | 137.1761  | 165.3476  |
| 187.1429   | 209.5373  | 240.8454  | 279.5029  | 306.9762  | 332.2083  |
| 414.1925   | 527.2588  | 613.0986  | 687.8514  | 730.7402  | 837.6461  |
| 847.6341   | 873.9407  | 923.1531  | 998.6152  | 1036.7634 | 1060.9235 |
| 1086.4947  | 1115.0645 | 1147.4208 | 1157.4722 | 1178.6096 | 1221.5300 |
| 1228.5710  | 1256.1325 | 1285.6219 | 1292.5601 | 1334.1284 | 1356.4924 |
| 1373.3375  | 1376.9084 | 1431.7554 | 1441.4974 | 1441.9053 | 1446.1608 |
| 1453.0804  | 1456.0742 | 1459.3368 | 1779.3666 | 2956.5211 | 2957.4368 |
| 2968.8211  | 2984.2606 | 2995.3674 | 3022.1403 | 3035.7992 | 3041.6657 |
| 3064.7212  | 3067.6732 | 3100.1273 |           |           |           |

=====  
 Structure 7  
 =====

|            |           |           |           |           |           |
|------------|-----------|-----------|-----------|-----------|-----------|
| 1452.1785i | 47.8142   | 66.0550   | 107.2654  | 133.4206  | 156.6320  |
| 195.6499   | 222.9376  | 238.4400  | 285.9814  | 296.4239  | 334.5824  |
| 373.0489   | 549.1253  | 645.9020  | 673.7217  | 722.5540  | 830.2541  |
| 836.4299   | 895.5852  | 926.8362  | 1005.6568 | 1041.2979 | 1057.6572 |
| 1067.5873  | 1108.9755 | 1146.6988 | 1150.9099 | 1175.1593 | 1214.3976 |
| 1223.0577  | 1237.2757 | 1272.4861 | 1287.5700 | 1358.0824 | 1366.7507 |
| 1375.4022  | 1390.8357 | 1423.3353 | 1440.3413 | 1442.1877 | 1449.4798 |
| 1453.9758  | 1456.3363 | 1460.1738 | 1777.5945 | 2943.7899 | 2954.8594 |
| 2964.6462  | 2983.9798 | 2996.7531 | 3020.0447 | 3040.2767 | 3042.2620 |
| 3055.1879  | 3066.9132 | 3100.8551 |           |           |           |

=====  
 Structure 8  
 =====

|            |           |           |           |           |           |
|------------|-----------|-----------|-----------|-----------|-----------|
| 1444.0808i | 49.8629   | 71.4495   | 98.3025   | 108.0753  | 139.0538  |
| 171.0752   | 234.7043  | 236.9544  | 300.5907  | 320.0083  | 324.5650  |
| 345.3163   | 498.6677  | 664.8049  | 705.9677  | 712.7478  | 802.9218  |
| 866.8052   | 890.8565  | 913.9225  | 1020.6368 | 1045.7034 | 1069.3730 |
| 1085.7881  | 1112.9653 | 1147.3120 | 1164.4369 | 1178.7810 | 1219.8116 |
| 1229.9322  | 1232.1822 | 1280.5691 | 1291.4676 | 1327.7171 | 1362.0025 |
| 1373.2303  | 1378.8415 | 1432.6219 | 1436.4325 | 1441.6298 | 1447.2067 |
| 1453.7871  | 1455.8586 | 1460.8702 | 1779.4867 | 2939.7553 | 2954.7130 |
| 2957.8837  | 2984.5569 | 2989.3688 | 3012.3926 | 3034.3450 | 3042.3323 |
| 3062.4245  | 3068.1160 | 3100.4108 |           |           |           |

=====  
 Structure 9  
 =====

```

=====
1449.8561i    48.5461    65.7849    100.7945    133.0282    143.6245
 177.5657    233.1238    262.0603    299.1383    327.7208    355.3438
 409.6803    442.1108    678.8386    696.8260    744.5048    799.8219
 867.4636    911.1349    923.9237    975.1640    1043.3061    1064.6364
1078.2533    1108.6371    1147.0157    1153.8127    1172.4429    1204.3225
1217.5722    1222.1395    1260.3280    1313.5593    1336.2759    1374.7825
1379.2262    1390.5070    1428.2298    1439.8888    1441.9463    1444.9899
1454.1290    1456.2918    1461.1842    1780.7689    2953.8720    2958.7690
2960.4022    2984.0132    2996.1357    3005.3764    3035.9541    3041.8541
3044.5199    3067.0755    3100.6959

```

```

=====
Structure 10
=====

```

```

1440.3116i    47.7008    51.5247    104.7325    138.0174    166.9227
 178.6042    215.0658    260.0031    287.0929    322.0223    343.9001
 449.6479    503.3117    610.7762    696.9779    739.9620    833.1068
 839.1519    876.3168    930.5082    974.3370    1032.4668    1062.6984
1085.0347    1115.0740    1139.7483    1147.3325    1178.1287    1214.9348
1232.8986    1254.4271    1280.9419    1315.0852    1329.2966    1355.4154
1372.1844    1380.4662    1431.4538    1440.2906    1441.5609    1446.8080
1455.6772    1456.3189    1461.0232    1778.5194    2957.9693    2962.3244
2967.9133    2984.2224    3002.8760    3026.2394    3035.2330    3042.4101
3067.5446    3074.5614    3100.2112

```

```

=====
Structure 11
=====

```

```

1434.3140i    55.7619    69.9699    100.1903    136.4121    169.7076
 199.7616    222.8144    288.6864    293.2648    300.1411    337.7198
 452.3658    493.6186    614.1810    693.8614    756.6141    818.3427
 857.2807    873.8577    917.5639    976.2187    1035.0385    1064.0164
1086.1383    1110.8334    1146.7414    1159.2114    1178.2609    1214.0174
1233.9411    1257.4057    1279.5486    1313.1197    1333.1251    1356.9947
1364.1254    1381.4893    1432.2780    1440.5976    1441.3844    1444.2830
1455.3939    1455.8164    1464.6274    1776.6139    2955.6425    2958.9741
2971.3984    2983.7537    2996.8485    3025.1700    3037.5120    3041.3078
3059.7165    3067.0578    3099.6887

```

```

=====
Structure 12
=====

```

```

1444.0622i    30.1325    66.3297    103.5323    124.6838    140.3941

```

|           |           |           |           |           |           |
|-----------|-----------|-----------|-----------|-----------|-----------|
| 173.6385  | 219.9120  | 264.6343  | 299.3446  | 312.0037  | 329.4840  |
| 415.6812  | 470.5212  | 654.0093  | 705.9562  | 739.0012  | 799.7901  |
| 861.6662  | 878.4252  | 921.8561  | 984.5737  | 1042.7872 | 1075.9340 |
| 1085.8246 | 1107.9888 | 1147.2880 | 1155.7169 | 1177.7904 | 1222.5495 |
| 1229.5655 | 1237.3331 | 1277.6996 | 1306.7194 | 1331.7140 | 1361.7521 |
| 1368.8496 | 1379.8818 | 1432.0829 | 1436.1090 | 1441.3443 | 1444.1021 |
| 1455.0762 | 1455.8597 | 1461.6158 | 1778.7960 | 2937.5971 | 2959.3307 |
| 2960.6588 | 2984.4904 | 3002.3133 | 3021.6011 | 3036.0229 | 3042.3619 |
| 3068.0888 | 3076.9821 | 3100.2587 |           |           |           |

=====  
Structure 13  
=====

|            |           |           |           |           |           |
|------------|-----------|-----------|-----------|-----------|-----------|
| 1452.0874i | 45.3019   | 73.8298   | 103.3051  | 134.0592  | 143.6535  |
| 182.4258   | 227.2254  | 264.6659  | 298.4057  | 324.6688  | 357.9298  |
| 419.6604   | 467.4363  | 663.5411  | 706.5737  | 744.2776  | 800.8643  |
| 860.6282   | 877.4607  | 924.9058  | 980.6299  | 1057.2835 | 1068.5576 |
| 1084.9267  | 1111.5697 | 1147.4486 | 1154.7603 | 1177.9393 | 1216.8203 |
| 1221.2103  | 1237.7156 | 1273.1355 | 1302.6615 | 1335.0415 | 1365.7908 |
| 1371.9299  | 1380.8668 | 1429.4739 | 1436.1233 | 1441.6703 | 1444.3876 |
| 1454.1247  | 1456.0277 | 1461.4596 | 1780.9944 | 2952.5450 | 2958.2369 |
| 2959.2203  | 2984.5675 | 2995.0179 | 3005.3556 | 3036.3868 | 3043.0233 |
| 3057.0619  | 3068.1460 | 3100.4246 |           |           |           |

=====  
Structure 14  
=====

|            |           |           |           |           |           |
|------------|-----------|-----------|-----------|-----------|-----------|
| 1457.7024i | 46.8795   | 97.5771   | 126.7941  | 141.4796  | 173.1983  |
| 208.5036   | 242.4261  | 290.9874  | 306.1452  | 326.5579  | 357.9501  |
| 399.8410   | 521.9605  | 648.7930  | 665.2426  | 757.9823  | 804.6670  |
| 855.8382   | 898.3692  | 934.7173  | 973.7235  | 1042.7392 | 1070.1124 |
| 1077.1220  | 1096.3543 | 1143.3044 | 1147.7518 | 1174.5263 | 1209.7557 |
| 1228.5652  | 1236.7646 | 1263.8404 | 1324.0961 | 1331.5906 | 1362.1602 |
| 1380.7008  | 1384.0820 | 1428.7678 | 1439.1550 | 1442.3577 | 1442.9863 |
| 1451.8467  | 1456.3803 | 1458.3838 | 1778.5815 | 2954.8109 | 2963.1598 |
| 2964.1404  | 2983.8545 | 3000.1057 | 3020.2571 | 3038.7659 | 3051.0554 |
| 3057.4684  | 3066.8782 | 3100.5876 |           |           |           |

=====  
Structure 15  
=====

|            |          |          |          |           |           |
|------------|----------|----------|----------|-----------|-----------|
| 1456.8488i | 31.7725  | 64.1834  | 132.4904 | 148.8512  | 167.1324  |
| 203.5088   | 252.8506 | 281.9741 | 298.3952 | 320.6188  | 354.0440  |
| 389.1939   | 524.9576 | 665.6508 | 693.7837 | 736.6346  | 811.8904  |
| 829.6647   | 900.5444 | 924.9601 | 970.8368 | 1037.0031 | 1058.3400 |

|           |           |           |           |           |           |
|-----------|-----------|-----------|-----------|-----------|-----------|
| 1073.5752 | 1116.6426 | 1142.3265 | 1147.2712 | 1173.3752 | 1213.0605 |
| 1233.2452 | 1252.5675 | 1269.3968 | 1331.0653 | 1352.5466 | 1364.8625 |
| 1378.0001 | 1389.4222 | 1425.1387 | 1440.5653 | 1442.0848 | 1444.5875 |
| 1452.2736 | 1456.3871 | 1462.5413 | 1777.6167 | 2943.4009 | 2954.5104 |
| 2972.4210 | 2983.6981 | 2984.6786 | 3024.4863 | 3040.5177 | 3049.5931 |
| 3050.6366 | 3066.4312 | 3100.4533 |           |           |           |

=====  
Structure 16  
=====

|            |           |           |           |           |           |
|------------|-----------|-----------|-----------|-----------|-----------|
| 1461.1254i | 44.9730   | 63.2286   | 97.5381   | 134.7094  | 160.3340  |
| 192.2052   | 221.7281  | 241.2530  | 298.0533  | 303.7441  | 340.0333  |
| 375.3430   | 578.4059  | 611.1435  | 682.1398  | 719.6747  | 826.4320  |
| 844.4001   | 869.0645  | 920.2687  | 1006.6848 | 1043.7727 | 1066.4327 |
| 1080.7422  | 1105.5169 | 1146.9759 | 1151.4555 | 1178.7302 | 1219.1426 |
| 1228.9873  | 1266.6019 | 1285.5259 | 1287.8786 | 1332.0131 | 1357.1355 |
| 1373.8989  | 1375.8585 | 1426.2890 | 1437.6487 | 1441.2112 | 1448.5348 |
| 1453.5745  | 1455.7937 | 1460.2832 | 1777.6604 | 2944.9710 | 2955.2690 |
| 2966.9868  | 2984.8560 | 2995.5207 | 3017.4018 | 3037.5162 | 3040.6101 |
| 3067.1353  | 3068.8673 | 3100.0013 |           |           |           |

=====  
Structure 17  
=====

|            |           |           |           |           |           |
|------------|-----------|-----------|-----------|-----------|-----------|
| 1451.6593i | 25.5059   | 88.9689   | 131.6783  | 148.0312  | 180.5841  |
| 203.3782   | 249.3724  | 281.1135  | 291.2183  | 320.5084  | 354.0422  |
| 401.6689   | 552.8750  | 627.6513  | 729.8463  | 738.6218  | 803.7310  |
| 834.6386   | 870.7435  | 917.8766  | 974.1567  | 1034.3998 | 1059.8065 |
| 1093.7398  | 1110.9416 | 1141.0515 | 1146.4940 | 1178.8827 | 1222.7963 |
| 1250.1761  | 1265.5074 | 1290.9164 | 1327.0718 | 1334.4870 | 1359.3795 |
| 1377.5016  | 1387.7088 | 1426.8576 | 1436.4568 | 1441.3342 | 1448.2157 |
| 1453.5175  | 1456.4552 | 1464.8035 | 1773.1977 | 2940.2123 | 2957.6735 |
| 2971.2964  | 2982.2374 | 2984.8700 | 3024.6874 | 3040.2190 | 3050.5782 |
| 3064.8774  | 3068.8438 | 3099.9831 |           |           |           |

=====  
Structure 18  
=====

|            |           |           |           |           |           |
|------------|-----------|-----------|-----------|-----------|-----------|
| 1462.8952i | 35.5645   | 71.1332   | 128.6269  | 144.2916  | 184.8793  |
| 204.0420   | 236.8757  | 287.9662  | 316.0273  | 326.1453  | 360.9731  |
| 418.7914   | 533.8563  | 620.3196  | 673.4461  | 758.9973  | 801.7032  |
| 864.0934   | 869.9000  | 924.7765  | 984.9080  | 1044.2472 | 1079.6713 |
| 1087.4919  | 1092.0257 | 1147.1109 | 1149.1922 | 1178.8901 | 1218.3339 |
| 1245.5329  | 1259.8204 | 1280.2174 | 1324.3220 | 1325.5362 | 1337.4575 |
| 1358.5650  | 1382.2777 | 1431.5605 | 1437.2255 | 1440.9798 | 1443.3108 |

|           |           |           |           |           |           |
|-----------|-----------|-----------|-----------|-----------|-----------|
| 1451.2462 | 1455.9197 | 1456.0599 | 1776.1720 | 2956.6525 | 2962.9208 |
| 2968.3112 | 2984.6585 | 3000.8147 | 3019.8108 | 3041.4299 | 3043.9960 |
| 3068.3346 | 3068.5131 | 3099.7822 |           |           |           |

=====  
 Structure 19  
 =====

|            |           |           |           |           |           |
|------------|-----------|-----------|-----------|-----------|-----------|
| 1465.3567i | 37.4595   | 51.6495   | 100.3867  | 132.9000  | 154.2339  |
| 181.4588   | 200.0162  | 271.6933  | 300.6366  | 335.6343  | 356.4656  |
| 413.7617   | 540.6008  | 616.5902  | 686.8773  | 748.7415  | 822.3751  |
| 835.3197   | 877.9612  | 916.6806  | 980.5902  | 1039.5348 | 1064.8713 |
| 1083.3813  | 1103.5970 | 1138.9987 | 1147.1357 | 1177.9325 | 1208.2327 |
| 1232.6388  | 1255.5731 | 1278.8466 | 1319.1941 | 1332.3688 | 1346.3903 |
| 1376.6289  | 1386.2395 | 1427.2445 | 1437.2061 | 1441.2764 | 1447.4620 |
| 1454.0335  | 1455.7894 | 1459.4337 | 1779.1570 | 2955.9595 | 2959.1391 |
| 2973.5818  | 2984.7842 | 3004.1061 | 3016.5191 | 3037.4516 | 3044.2710 |
| 3068.5122  | 3068.6698 | 3100.1955 |           |           |           |

=====  
 Structure 20  
 =====

|            |           |           |           |           |           |
|------------|-----------|-----------|-----------|-----------|-----------|
| 1450.5238i | 61.9028   | 76.9765   | 103.9796  | 135.3880  | 204.4356  |
| 209.7639   | 231.7508  | 241.0793  | 271.5769  | 297.1333  | 355.9915  |
| 418.3009   | 551.7184  | 579.7331  | 653.3912  | 715.5172  | 786.2381  |
| 847.6469   | 881.2039  | 924.8495  | 1022.9056 | 1051.1655 | 1069.5261 |
| 1081.7093  | 1114.9352 | 1140.1419 | 1149.6898 | 1169.8001 | 1213.7885 |
| 1226.3292  | 1247.1316 | 1268.6476 | 1289.9921 | 1339.8049 | 1370.6654 |
| 1373.7171  | 1383.1815 | 1431.8549 | 1447.1808 | 1447.7857 | 1453.3274 |
| 1457.7436  | 1459.1016 | 1463.0044 | 1793.7613 | 2953.5611 | 2957.2810 |
| 2963.3407  | 2967.1536 | 3008.7626 | 3025.4523 | 3037.2950 | 3041.9655 |
| 3043.2040  | 3043.8954 | 3087.0205 |           |           |           |

=====  
 Structure 21  
 =====

|            |           |           |           |           |           |
|------------|-----------|-----------|-----------|-----------|-----------|
| 1453.2242i | 62.5424   | 78.3453   | 108.2505  | 127.6096  | 138.3615  |
| 207.6614   | 236.4062  | 245.7075  | 289.7436  | 300.5444  | 337.9156  |
| 394.4313   | 535.6180  | 588.5119  | 653.9809  | 709.7800  | 804.8078  |
| 848.0856   | 892.6540  | 915.0632  | 1030.8576 | 1054.7635 | 1074.4786 |
| 1083.1708  | 1115.0832 | 1139.7552 | 1148.1341 | 1173.1642 | 1206.3179 |
| 1222.4683  | 1230.4765 | 1264.1401 | 1278.3997 | 1344.4537 | 1364.4639 |
| 1377.4866  | 1392.7621 | 1428.6937 | 1446.5417 | 1447.7394 | 1453.6812 |
| 1457.4475  | 1461.0232 | 1462.8222 | 1796.7718 | 2947.1828 | 2953.7583 |
| 2959.4212  | 2963.0814 | 2986.3910 | 3015.4431 | 3036.0645 | 3038.2364 |
| 3043.0947  | 3043.3187 | 3086.7312 |           |           |           |

=====  
 Structure 22  
 =====

|            |           |           |           |           |           |
|------------|-----------|-----------|-----------|-----------|-----------|
| 1451.4357i | 53.0108   | 62.3595   | 120.0451  | 139.5374  | 202.0032  |
| 210.6187   | 224.5687  | 258.0898  | 292.2985  | 323.8256  | 343.8662  |
| 447.5799   | 531.1011  | 579.1034  | 655.1829  | 725.8154  | 790.9393  |
| 832.5775   | 878.9084  | 936.3253  | 982.2929  | 1058.7116 | 1064.2684 |
| 1081.6191  | 1116.9393 | 1139.9095 | 1149.4343 | 1151.9518 | 1209.5880 |
| 1230.4893  | 1242.3777 | 1265.9582 | 1315.2958 | 1329.9242 | 1364.8136 |
| 1375.5111  | 1386.4087 | 1430.3924 | 1447.2673 | 1448.2607 | 1455.4134 |
| 1457.6732  | 1459.6474 | 1462.9517 | 1793.3468 | 2954.5988 | 2962.7760 |
| 2966.5299  | 2972.9782 | 3013.4701 | 3029.3858 | 3036.4534 | 3039.9093 |
| 3043.1006  | 3052.7191 | 3086.7878 |           |           |           |

=====  
 Structure 23  
 =====

|            |           |           |           |           |           |
|------------|-----------|-----------|-----------|-----------|-----------|
| 1456.6991i | 66.0655   | 68.2506   | 114.2107  | 132.9340  | 202.1337  |
| 221.9844   | 226.1471  | 239.5286  | 269.0395  | 303.1317  | 369.3163  |
| 425.0915   | 555.7821  | 601.7682  | 646.8418  | 707.9618  | 785.1278  |
| 842.9339   | 873.0677  | 923.1959  | 1022.8615 | 1056.0645 | 1060.6395 |
| 1082.7819  | 1112.7927 | 1139.7131 | 1150.0859 | 1162.4182 | 1213.6668 |
| 1222.8636  | 1237.5920 | 1273.7905 | 1288.0739 | 1355.5822 | 1367.0938 |
| 1375.4522  | 1390.6036 | 1420.7272 | 1447.3972 | 1449.0397 | 1454.2396 |
| 1457.5883  | 1459.4940 | 1463.0338 | 1794.2983 | 2948.6555 | 2955.5186 |
| 2963.4446  | 2964.6489 | 2999.2171 | 3021.4260 | 3041.5902 | 3042.1095 |
| 3044.2414  | 3046.7034 | 3087.4467 |           |           |           |

=====  
 Structure 24  
 =====

|            |           |           |           |           |           |
|------------|-----------|-----------|-----------|-----------|-----------|
| 1454.1393i | 34.9631   | 87.9006   | 115.7462  | 131.9664  | 144.7889  |
| 208.6769   | 241.7309  | 267.8724  | 291.3549  | 305.8070  | 346.9412  |
| 431.6443   | 510.6527  | 590.6994  | 652.8166  | 730.4198  | 799.4748  |
| 850.3366   | 874.3381  | 924.6839  | 987.7427  | 1057.8354 | 1073.4787 |
| 1090.6879  | 1110.4575 | 1139.7789 | 1147.7837 | 1163.1901 | 1208.9706 |
| 1221.9582  | 1228.6916 | 1262.0355 | 1310.4279 | 1333.1447 | 1362.9151 |
| 1378.1903  | 1391.1797 | 1429.2278 | 1444.1624 | 1447.2745 | 1455.0194 |
| 1457.6183  | 1461.7883 | 1462.9132 | 1796.4936 | 2947.7454 | 2957.2541 |
| 2961.3518  | 2962.7349 | 3003.0883 | 3025.5805 | 3033.1321 | 3040.3530 |
| 3043.1410  | 3053.1549 | 3086.5160 |           |           |           |

=====  
 Structure 25  
 =====

```

=====
1445.1513i    54.5986    91.3536    115.8062    137.2191    209.1111
 214.8277    231.3630    281.3643    291.5418    312.9226    343.3624
 451.0234    528.2859    573.1596    649.5975    748.5105    774.8647
 846.6490    882.9727    920.9252    985.4368    1062.5036    1071.4379
1082.7570    1110.0025    1139.9052    1147.6480    1167.2773    1206.5807
1235.0939    1244.6043    1257.9151    1311.6249    1335.1110    1353.2755
1382.0625    1385.1190    1431.5121    1441.7905    1447.4495    1452.5670
1457.4212    1458.0076    1463.2551    1795.1830    2949.2346    2961.8392
2962.7110    2971.5947    2995.4688    3027.9194    3034.8314    3039.6837
3043.1185    3051.9730    3086.4460

```

```

=====
Structure 26
=====

```

```

1457.1374i    52.8327    97.5156    111.9854    130.4453    174.3914
 207.5918    244.0570    257.8284    306.4785    326.1756    359.9240
 430.6247    508.0654    591.4135    655.0409    734.4405    801.9952
 857.2785    874.8995    922.4228    985.7042    1060.8637    1078.8983
1086.4967    1108.7979    1139.7895    1146.4737    1161.2969    1208.3589
1214.7265    1225.5449    1258.2135    1309.9045    1335.9331    1374.1436
1378.9543    1389.0652    1426.3665    1444.0722    1447.0638    1454.0619
1457.7615    1460.6045    1462.6730    1798.0451    2953.2337    2958.4131
2963.2024    2966.5691    2998.8344    3009.1187    3032.0965    3035.6634
3041.0338    3043.7454    3086.8445

```

```

=====
Structure 27
=====

```

```

1462.2514i    67.1189    98.5719    132.5036    165.6207    203.6763
 219.6471    252.5893    295.6027    305.5236    323.7306    392.3334
 458.9641    547.7511    572.0377    641.6603    751.4961    775.0677
 837.0341    882.7916    928.6994    985.6575    1068.3780    1076.0087
1080.7074    1104.6821    1139.4302    1148.2783    1158.0028    1215.4962
1223.5973    1236.9847    1264.4252    1324.6653    1332.3676    1361.8454
1377.0491    1385.1575    1428.1428    1441.7405    1447.2257    1452.1487
1457.6545    1457.7627    1463.0752    1795.6951    2952.9456    2964.1396
2965.0611    2969.1676    3000.1567    3022.9678    3038.5999    3045.8559
3047.3601    3054.6665    3086.8920

```

### S.3.4 $(TS_\beta)^\ddagger$

Structure 1

```

=====
1269.2464i   31.7575   69.1952   82.3303   136.0357   164.7554
 172.2349   223.8808   238.3545   276.7639   302.6056   343.6161
 358.6349   510.3167   570.3361   671.7425   735.7837   826.4567
 837.7258   901.7789   921.9218   1004.0827  1029.0712  1056.8795
1089.6168   1098.5697  1144.6622  1170.2516  1173.4621  1179.8442
1196.3157   1223.0276  1247.9412  1278.4696  1341.1965  1369.5091
1382.5351   1404.7632  1430.1820  1433.7299  1439.7132  1450.5575
1452.9318   1454.6717  1577.8691  1792.0666  2932.3449  2954.5087
2965.9528   2971.4913  2979.1188  3009.7463  3029.3232  3032.1342
3038.7335   3062.7044  3095.4280

```

Structure 2

```

=====
1299.8156i   33.3845   62.8891   96.2159   112.0544   135.9666
 173.5871   224.2910   245.7023   285.8526   309.0656   325.3670
 350.7900   476.4314   573.3942   690.4728   737.6066   813.4152
 880.6014   910.1294   915.6372  1011.5085  1038.5920  1063.9839
1079.9711   1108.2651  1145.0473  1156.1585  1169.2675  1180.2994
1197.5241   1211.0944  1245.8065  1263.7948  1340.2012  1373.2261
1392.1815   1401.2773  1431.0397  1436.9248  1439.4687  1450.0593
1453.0761   1455.2897  1543.2157  1799.5797  2916.2763  2932.2449
2956.0804   2965.8875  2978.8767  3001.6593  3033.1831  3039.4789
3040.5669   3062.5375  3095.0734

```

Structure 3

```

=====
1267.8997i   30.6630   43.0796   116.6907   137.1352   159.3068
 169.7191   226.2503   268.0335   283.9919   288.1064   351.9456
 436.6322   485.2825   573.7832   672.6342   737.8179   816.4516
 838.8909   901.8431   928.9933   965.5394  1028.4965  1057.1578
1072.5881   1109.1922  1144.5544  1159.4333  1170.5680  1184.0808
1197.5096   1218.6184  1247.0961  1322.0951  1329.7393  1364.2665
1377.8677   1408.3236  1431.2091  1433.4753  1439.5170  1451.4483
1452.8913   1458.8327  1573.1272  1791.5354  2944.2066  2953.3299
2971.9166   2979.0034  2987.9364  3017.6604  3029.3554  3037.0205
3038.6726   3062.5057  3095.3572

```

Structure 4



|            |           |           |           |           |           |
|------------|-----------|-----------|-----------|-----------|-----------|
| 1299.1167i | 36.2211   | 51.9029   | 98.4331   | 134.8066  | 142.1034  |
| 173.3032   | 230.4952  | 238.1979  | 277.3355  | 312.8183  | 322.7502  |
| 418.0112   | 477.6328  | 571.4334  | 692.2829  | 744.6917  | 815.2809  |
| 867.9906   | 904.9561  | 921.8955  | 968.5627  | 1036.4280 | 1061.3830 |
| 1075.6003  | 1113.5716 | 1144.9233 | 1147.8497 | 1170.5105 | 1187.6055 |
| 1201.5989  | 1209.7948 | 1242.3255 | 1300.0981 | 1324.7893 | 1372.9595 |
| 1389.6865  | 1401.7150 | 1429.1186 | 1436.5275 | 1439.4011 | 1451.7255 |
| 1453.1071  | 1457.4689 | 1543.1416 | 1799.2894 | 2916.8079 | 2927.5920 |
| 2955.2827  | 2978.8486 | 2986.7336 | 3007.3414 | 3032.2293 | 3038.5200 |
| 3049.3405  | 3062.5026 | 3095.0749 |           |           |           |

=====  
Structure 5  
=====

|            |           |           |           |           |           |
|------------|-----------|-----------|-----------|-----------|-----------|
| 1298.2190i | 33.6985   | 45.9640   | 98.4803   | 128.4350  | 137.2558  |
| 172.9186   | 216.9853  | 232.1099  | 279.0724  | 312.8499  | 340.9141  |
| 419.2491   | 431.9146  | 574.1869  | 694.0908  | 747.7578  | 809.9278  |
| 873.1522   | 904.7599  | 932.2293  | 966.4672  | 1034.0145 | 1049.9080 |
| 1089.0919  | 1111.8608 | 1145.0004 | 1152.9095 | 1170.1690 | 1183.0626 |
| 1197.9869  | 1213.1961 | 1250.7780 | 1296.4696 | 1325.2285 | 1365.7394 |
| 1389.9453  | 1401.8927 | 1435.9531 | 1438.3107 | 1439.4251 | 1450.6068 |
| 1453.0733  | 1455.5448 | 1547.7973 | 1799.1201 | 2936.9292 | 2951.2985 |
| 2953.6881  | 2978.8749 | 2994.5751 | 3002.3773 | 3032.4136 | 3034.1060 |
| 3041.4418  | 3062.5374 | 3095.0739 |           |           |           |

=====  
Structure 6  
=====

|            |           |           |           |           |           |
|------------|-----------|-----------|-----------|-----------|-----------|
| 1283.4046i | 22.4985   | 59.8848   | 74.1592   | 136.8240  | 162.3736  |
| 176.3670   | 223.2033  | 243.0475  | 281.0220  | 303.9738  | 350.9374  |
| 373.3081   | 501.2957  | 593.5286  | 674.5822  | 736.0547  | 826.9428  |
| 841.1481   | 871.6633  | 924.4645  | 1003.8388 | 1039.0719 | 1060.0941 |
| 1091.0908  | 1097.6936 | 1144.9799 | 1171.4809 | 1174.0096 | 1182.7134 |
| 1196.8105  | 1247.6553 | 1256.5162 | 1295.8036 | 1298.6036 | 1367.9084 |
| 1377.9540  | 1412.0999 | 1427.2590 | 1431.9154 | 1439.0737 | 1450.4074 |
| 1452.7719  | 1454.7895 | 1563.2694 | 1796.5947 | 2918.0919 | 2955.2101 |
| 2968.4670  | 2971.2454 | 2979.0462 | 3026.8890 | 3032.1022 | 3039.6985 |
| 3040.9928  | 3062.7829 | 3094.9152 |           |           |           |

=====  
Structure 7  
=====

|            |          |          |          |          |          |
|------------|----------|----------|----------|----------|----------|
| 1296.3563i | 24.1917  | 79.6776  | 115.4590 | 138.9092 | 142.5808 |
| 200.2431   | 232.4130 | 254.4030 | 285.5185 | 300.4639 | 375.8555 |
| 416.1500   | 482.1773 | 619.4828 | 736.3417 | 750.8829 | 815.7873 |

|           |           |           |           |           |           |
|-----------|-----------|-----------|-----------|-----------|-----------|
| 835.5224  | 894.3201  | 932.3138  | 963.5337  | 1031.6777 | 1059.1462 |
| 1086.2208 | 1097.1629 | 1144.6280 | 1150.9036 | 1172.3894 | 1180.6113 |
| 1201.6188 | 1245.6869 | 1250.8626 | 1314.1061 | 1327.8354 | 1342.4377 |
| 1374.4824 | 1421.9129 | 1427.7361 | 1436.8637 | 1439.1638 | 1448.4376 |
| 1452.4179 | 1466.7981 | 1523.3441 | 1787.2286 | 2933.2956 | 2955.5362 |
| 2978.9821 | 2984.3158 | 2996.1479 | 3022.0321 | 3032.8576 | 3047.0552 |
| 3058.2628 | 3062.5409 | 3095.5271 |           |           |           |

=====  
Structure 8  
=====

|            |           |           |           |           |           |
|------------|-----------|-----------|-----------|-----------|-----------|
| 1271.2510i | 26.6269   | 74.4201   | 92.4402   | 136.4512  | 160.7970  |
| 181.7561   | 228.7784  | 242.2189  | 284.6866  | 302.8574  | 356.9956  |
| 404.2235   | 477.9181  | 569.6633  | 678.2676  | 753.2814  | 816.3274  |
| 856.1003   | 907.9190  | 914.0425  | 968.3684  | 1031.6577 | 1048.5976 |
| 1087.2175  | 1107.9585 | 1144.7737 | 1169.8154 | 1173.7272 | 1181.9787 |
| 1192.7811  | 1220.2696 | 1255.1828 | 1297.9977 | 1327.5906 | 1366.1091 |
| 1380.4536  | 1405.0169 | 1433.8160 | 1436.5751 | 1439.7089 | 1446.3504 |
| 1452.7765  | 1453.2879 | 1579.1269 | 1793.3353 | 2947.7105 | 2952.8423 |
| 2953.6452  | 2979.1976 | 2995.1740 | 3014.5678 | 3028.9269 | 3038.3696 |
| 3044.4080  | 3063.0075 | 3095.5201 |           |           |           |

=====  
Structure 9  
=====

|            |           |           |           |           |           |
|------------|-----------|-----------|-----------|-----------|-----------|
| 1289.7675i | 22.4172   | 58.4703   | 69.9429   | 132.4529  | 147.4598  |
| 194.2082   | 225.7237  | 241.6648  | 280.2374  | 302.5576  | 346.2382  |
| 406.8935   | 432.5481  | 621.4261  | 734.2342  | 750.1369  | 823.8630  |
| 851.2730   | 881.5086  | 928.5519  | 994.5280  | 1036.7355 | 1058.4335 |
| 1086.3612  | 1092.8341 | 1144.5250 | 1164.3224 | 1171.1486 | 1179.0082 |
| 1195.1403  | 1245.5442 | 1256.6537 | 1278.0603 | 1322.2651 | 1365.3264 |
| 1374.7304  | 1421.5592 | 1427.7123 | 1435.6587 | 1438.9951 | 1450.4565 |
| 1452.5326  | 1455.1106 | 1541.4464 | 1791.6717 | 2927.0148 | 2955.4945 |
| 2973.5742  | 2979.0140 | 2987.9851 | 3020.6141 | 3032.5383 | 3040.1905 |
| 3051.5650  | 3062.4643 | 3095.5934 |           |           |           |

=====  
Structure 10  
=====

|            |           |           |           |           |           |
|------------|-----------|-----------|-----------|-----------|-----------|
| 1301.2653i | 31.2495   | 60.5359   | 98.6693   | 103.2595  | 137.7623  |
| 180.6610   | 222.9722  | 239.0879  | 285.7425  | 315.8708  | 326.6269  |
| 356.0396   | 469.3871  | 599.5222  | 681.1229  | 738.3064  | 804.9224  |
| 864.4107   | 892.1287  | 915.5006  | 1020.2187 | 1049.9917 | 1064.9954 |
| 1079.6104  | 1106.8064 | 1145.1648 | 1160.4283 | 1174.6591 | 1185.4814 |
| 1202.9917  | 1222.8731 | 1247.0458 | 1295.3810 | 1320.7777 | 1370.6740 |

|           |           |           |           |           |           |
|-----------|-----------|-----------|-----------|-----------|-----------|
| 1377.2685 | 1404.2435 | 1431.2279 | 1433.0767 | 1438.9190 | 1450.2840 |
| 1452.2961 | 1454.9720 | 1541.1469 | 1798.3099 | 2916.7020 | 2930.7913 |
| 2955.6192 | 2969.2842 | 2979.6989 | 3023.1567 | 3032.2430 | 3039.6731 |
| 3040.8213 | 3064.0029 | 3095.2538 |           |           |           |

=====  
Structure 11  
=====

|            |           |           |           |           |           |
|------------|-----------|-----------|-----------|-----------|-----------|
| 1294.7914i | 32.0227   | 73.9540   | 112.2053  | 137.2138  | 147.3462  |
| 204.8488   | 233.5144  | 249.1265  | 285.6405  | 297.1366  | 369.4775  |
| 419.9201   | 480.4332  | 618.2895  | 734.5880  | 750.8727  | 815.9752  |
| 850.5414   | 868.9713  | 940.4553  | 959.8011  | 1031.9909 | 1057.4942 |
| 1084.4538  | 1101.7767 | 1144.3979 | 1152.2508 | 1170.1331 | 1179.5415 |
| 1199.1022  | 1243.7903 | 1257.7787 | 1307.1663 | 1327.0220 | 1343.3351 |
| 1373.9924  | 1422.1158 | 1429.0591 | 1434.7283 | 1438.6929 | 1449.4563 |
| 1452.9606  | 1464.8095 | 1530.4634 | 1793.6604 | 2929.0536 | 2956.8375 |
| 2978.9213  | 2984.1967 | 2995.3696 | 3026.9792 | 3033.7119 | 3044.4968 |
| 3058.4032  | 3062.4873 | 3095.0527 |           |           |           |

=====  
Structure 12  
=====

|            |           |           |           |           |           |
|------------|-----------|-----------|-----------|-----------|-----------|
| 1314.8236i | 29.7533   | 66.4791   | 113.9821  | 138.8545  | 165.8076  |
| 180.3332   | 219.9988  | 234.3899  | 280.5305  | 291.3692  | 347.5874  |
| 365.2058   | 524.9438  | 566.0851  | 674.7677  | 734.9903  | 819.5398  |
| 835.8091   | 902.4151  | 918.7460  | 999.3383  | 1034.5676 | 1044.3580 |
| 1063.5052  | 1114.5521 | 1144.7517 | 1150.1609 | 1171.3219 | 1174.2460 |
| 1203.3767  | 1226.4760 | 1247.9162 | 1270.2434 | 1362.5029 | 1367.0279 |
| 1376.1934  | 1396.9404 | 1433.8364 | 1434.6689 | 1439.4668 | 1450.3371 |
| 1453.3543  | 1454.8457 | 1592.3700 | 1801.0461 | 2907.8458 | 2942.5492 |
| 2952.7182  | 2978.4959 | 2999.0076 | 3006.7159 | 3017.0583 | 3033.2282 |
| 3039.2445  | 3061.8264 | 3094.5750 |           |           |           |

=====  
Structure 13  
=====

|            |           |           |           |           |           |
|------------|-----------|-----------|-----------|-----------|-----------|
| 1288.7132i | 41.3203   | 50.1967   | 79.1761   | 136.2574  | 153.9612  |
| 188.9155   | 236.4989  | 247.4226  | 281.5500  | 301.6411  | 366.3484  |
| 402.7168   | 484.0496  | 591.4220  | 683.9085  | 754.9081  | 814.0250  |
| 849.1264   | 883.6725  | 917.0097  | 974.0112  | 1037.0479 | 1050.7224 |
| 1094.8488  | 1104.8226 | 1144.3440 | 1173.9908 | 1175.4981 | 1187.1388 |
| 1197.7866  | 1249.1280 | 1272.4620 | 1298.4818 | 1304.7438 | 1363.5195 |
| 1369.9139  | 1410.6054 | 1431.3895 | 1437.3169 | 1438.9339 | 1446.7898 |
| 1452.1094  | 1461.4517 | 1546.8815 | 1793.6614 | 2951.7920 | 2953.4726 |
| 2961.3433  | 2978.0426 | 2994.5464 | 3028.0757 | 3033.3625 | 3036.6999 |

3042.7434      3061.5800      3094.3860

=====  
Structure 14  
=====

|            |           |           |           |           |           |
|------------|-----------|-----------|-----------|-----------|-----------|
| 1300.2471i | 30.6394   | 50.8692   | 91.8669   | 126.6292  | 139.1122  |
| 188.3470   | 208.2486  | 233.6196  | 275.0217  | 310.8756  | 342.8552  |
| 411.3803   | 456.7955  | 594.2075  | 687.5507  | 748.8120  | 802.9617  |
| 862.2661   | 881.1809  | 930.1723  | 969.7773  | 1048.7818 | 1050.5530 |
| 1093.8797  | 1110.2593 | 1145.1293 | 1158.2390 | 1174.7200 | 1188.5226 |
| 1203.0383  | 1225.8236 | 1272.8032 | 1304.1109 | 1308.5822 | 1365.1770 |
| 1369.6881  | 1406.2834 | 1432.9083 | 1437.7101 | 1438.9250 | 1450.6295 |
| 1452.3305  | 1456.1736 | 1547.6862 | 1798.2710 | 2935.2772 | 2952.5275 |
| 2953.3726  | 2979.5908 | 2995.6074 | 3022.8772 | 3032.7834 | 3034.5528 |
| 3041.1787  | 3063.8869 | 3095.1123 |           |           |           |

=====  
Structure 15  
=====

|            |           |           |           |           |           |
|------------|-----------|-----------|-----------|-----------|-----------|
| 1309.7275i | 26.3788   | 48.2326   | 122.6608  | 142.5799  | 166.4344  |
| 176.1035   | 228.8889  | 237.2544  | 277.1527  | 292.3750  | 356.0670  |
| 426.8868   | 485.5816  | 565.3177  | 675.2726  | 745.0278  | 814.5463  |
| 838.0936   | 899.4344  | 926.8306  | 959.8304  | 1033.1230 | 1039.1751 |
| 1066.3600  | 1113.6433 | 1144.3480 | 1147.5023 | 1171.0365 | 1172.5789 |
| 1198.5651  | 1222.6394 | 1251.6766 | 1297.5101 | 1356.8733 | 1362.0245 |
| 1367.9562  | 1399.3885 | 1434.6459 | 1439.4979 | 1443.5671 | 1451.7291 |
| 1453.3022  | 1456.8797 | 1603.4804 | 1800.3721 | 2948.9235 | 2952.2170 |
| 2969.0926  | 2978.4596 | 2996.6371 | 3008.5998 | 3018.3568 | 3031.4487 |
| 3037.9576  | 3061.7411 | 3094.5774 |           |           |           |

=====  
Structure 16  
=====

|            |           |           |           |           |           |
|------------|-----------|-----------|-----------|-----------|-----------|
| 1301.1569i | 24.5661   | 51.2745   | 102.2132  | 126.1845  | 138.9887  |
| 185.9822   | 223.5596  | 233.5457  | 277.9356  | 305.9446  | 324.6508  |
| 436.0726   | 468.4390  | 590.2364  | 689.3065  | 742.6969  | 805.3144  |
| 862.1228   | 879.2656  | 919.6425  | 975.8299  | 1046.1354 | 1060.3982 |
| 1083.5970  | 1111.8404 | 1145.1236 | 1150.0480 | 1174.6468 | 1192.4982 |
| 1205.5249  | 1231.6271 | 1253.5504 | 1302.4786 | 1328.2552 | 1365.6966 |
| 1375.9092  | 1405.7263 | 1428.7224 | 1433.1116 | 1438.7662 | 1451.4657 |
| 1452.4114  | 1458.3182 | 1543.4890 | 1797.8501 | 2917.2453 | 2923.8076 |
| 2957.3502  | 2979.6280 | 2985.3550 | 3031.9222 | 3037.5904 | 3040.3435 |
| 3050.9257  | 3063.9434 | 3095.1116 |           |           |           |

Structure 17

```

=====
1315.6860i    30.3401    68.9272    88.0445    137.2920    166.8936
 182.2963    221.2575    242.9457    285.3930    305.2944    365.2634
 371.7219    511.2171    592.4719    701.0698    736.0039    821.0887
 839.5312    873.2954    923.4222    992.8209    1019.7263    1059.9525
1078.1914    1110.2874    1144.9696    1152.5640    1173.8125    1181.2800
1195.7081    1243.5419    1258.2193    1283.4782    1331.7270    1365.9807
1375.4885    1407.2927    1427.9784    1434.1983    1439.5062    1450.1974
1452.5142    1454.8778    1595.7599    1795.5390    2918.2540    2955.0129
2960.4372    2977.6258    2978.4672    3009.1186    3013.6677    3031.7363
3040.5450    3060.6966    3095.4184

```

Structure 18

```

=====
1312.5822i    23.1024    70.2419    108.5046    137.5625    142.2227
 185.8087    236.8747    253.3316    275.9491    291.0424    385.8688
 428.4128    462.0032    605.6865    730.8006    745.9165    818.2815
 837.1917    883.1380    930.7180    952.4988    1021.0740    1064.2250
1072.6921    1107.8656    1143.7925    1144.6886    1173.0268    1178.7223
1190.3227    1233.8755    1273.3299    1297.7811    1319.3033    1357.6716
1369.1472    1414.4357    1435.1458    1439.1178    1441.8623    1451.2271
1452.4394    1460.3580    1594.8857    1793.6066    2949.8278    2953.1691
2970.3962    2977.9084    2995.0006    3018.8014    3021.7336    3031.5445
3041.3849    3060.5493    3095.8423

```

Structure 19

```

=====
1329.2605i    31.1855    74.2314    118.2016    137.9124    141.8363
 201.1141    231.8564    245.3251    277.5505    294.3454    407.1878
 422.0607    433.0483    609.1752    741.2743    753.9704    816.8336
 844.9581    873.0311    932.0928    961.2161    1031.0994    1044.4045
1080.9602    1106.2704    1137.9359    1144.7115    1171.6787    1182.0663
1192.3502    1234.3413    1267.7624    1297.0008    1321.6023    1357.4794
1364.0486    1418.0970    1435.3017    1438.7056    1440.5564    1449.8106
1453.0351    1460.9102    1586.4191    1802.2407    2953.2008    2955.0838
2966.4390    2978.5063    2995.5583    3018.2345    3030.4015    3035.3699
3042.2445    3061.7848    3094.8241

```

Structure 20

|            |           |           |           |           |           |
|------------|-----------|-----------|-----------|-----------|-----------|
| 1317.3379i | 47.3373   | 61.2660   | 93.4980   | 142.4496  | 167.6008  |
| 200.2260   | 236.1310  | 259.9694  | 297.7776  | 316.1286  | 346.4173  |
| 405.1989   | 539.7551  | 585.6948  | 698.6076  | 750.9170  | 802.0117  |
| 844.0454   | 873.7691  | 919.2518  | 968.0761  | 1019.1556 | 1068.1705 |
| 1076.5153  | 1096.7588 | 1144.4468 | 1148.2133 | 1173.9628 | 1180.3480 |
| 1192.8956  | 1249.1148 | 1280.4874 | 1306.1744 | 1331.2534 | 1353.9851 |
| 1376.2805  | 1406.0724 | 1427.7670 | 1433.8336 | 1439.5607 | 1447.6626 |
| 1451.7190  | 1466.1531 | 1612.9423 | 1791.2464 | 2918.5982 | 2958.6402 |
| 2959.2071  | 2975.2160 | 2983.7544 | 3008.8165 | 3021.6196 | 3037.4430 |
| 3042.4520  | 3057.7162 | 3094.6781 |           |           |           |

=====  
Structure 21  
=====

|            |           |           |           |           |           |
|------------|-----------|-----------|-----------|-----------|-----------|
| 1331.2754i | 20.5055   | 80.6408   | 104.3802  | 139.5454  | 171.3678  |
| 200.7745   | 228.4190  | 262.4651  | 308.9986  | 312.7979  | 348.5027  |
| 394.7110   | 533.6037  | 572.2562  | 688.9809  | 744.8792  | 807.4834  |
| 841.2190   | 904.9297  | 915.9020  | 963.6300  | 1034.8987 | 1045.0827 |
| 1070.6944  | 1095.1512 | 1143.0859 | 1145.2727 | 1168.5192 | 1173.2638 |
| 1190.3671  | 1230.8267 | 1251.4412 | 1327.4640 | 1334.3718 | 1354.8222 |
| 1377.8402  | 1402.2770 | 1428.0452 | 1433.1639 | 1439.1023 | 1448.5248 |
| 1452.9114  | 1461.2035 | 1631.1880 | 1803.7347 | 2913.2042 | 2949.1288 |
| 2954.0115  | 2978.2601 | 2980.8213 | 2997.8455 | 3026.5578 | 3027.7634 |
| 3047.9728  | 3061.6242 | 3094.3070 |           |           |           |

=====  
Structure 22  
=====

|            |           |           |           |           |           |
|------------|-----------|-----------|-----------|-----------|-----------|
| 1349.8119i | 39.2838   | 56.2874   | 101.6637  | 136.4674  | 146.0483  |
| 222.3260   | 249.8402  | 254.4582  | 288.1092  | 325.0303  | 354.5032  |
| 406.9828   | 486.6925  | 615.8084  | 726.6544  | 761.3328  | 796.7827  |
| 863.9769   | 880.2471  | 930.7429  | 960.6720  | 1031.2389 | 1062.3115 |
| 1085.0994  | 1096.2048 | 1144.1548 | 1162.0299 | 1176.7248 | 1179.1429 |
| 1210.8071  | 1242.9848 | 1268.6724 | 1309.2625 | 1325.0006 | 1326.6116 |
| 1378.3512  | 1422.1709 | 1427.1452 | 1433.5315 | 1439.1844 | 1448.6976 |
| 1451.1551  | 1454.2360 | 1506.9724 | 1799.2894 | 2917.1879 | 2960.3828 |
| 2977.7889  | 2978.5134 | 2986.5905 | 3032.5559 | 3040.8901 | 3041.1477 |
| 3054.3175  | 3061.7574 | 3094.0009 |           |           |           |

=====  
Structure 23  
=====

|            |          |          |          |          |          |
|------------|----------|----------|----------|----------|----------|
| 1271.1957i | 39.0488  | 70.2620  | 94.4089  | 114.1142 | 181.9538 |
| 191.5074   | 226.0450 | 245.3446 | 256.9936 | 302.1845 | 355.8774 |
| 407.2977   | 523.5752 | 548.7571 | 593.3103 | 735.2443 | 797.5500 |

|           |           |           |           |           |           |
|-----------|-----------|-----------|-----------|-----------|-----------|
| 833.2856  | 870.9428  | 923.2253  | 1011.0963 | 1056.1233 | 1076.8906 |
| 1087.2065 | 1102.1721 | 1135.5388 | 1144.1984 | 1176.1111 | 1182.7843 |
| 1199.6658 | 1221.6961 | 1248.6082 | 1280.4285 | 1337.8598 | 1369.3927 |
| 1380.4778 | 1399.5215 | 1429.8002 | 1442.7965 | 1450.7096 | 1453.1974 |
| 1454.5139 | 1458.7907 | 1574.9560 | 1812.9536 | 2934.1313 | 2951.3959 |
| 2955.0385 | 2959.9684 | 2973.2966 | 2997.3103 | 3031.6211 | 3034.8149 |
| 3037.4990 | 3039.8762 | 3081.5474 |           |           |           |

=====  
Structure 24  
=====

|            |           |           |           |           |           |
|------------|-----------|-----------|-----------|-----------|-----------|
| 1305.8917i | 50.6285   | 70.9993   | 105.0242  | 118.1032  | 123.5451  |
| 195.7822   | 225.0484  | 243.3813  | 276.6142  | 313.8268  | 336.8200  |
| 399.1991   | 519.9837  | 538.7661  | 587.0525  | 737.6326  | 815.8055  |
| 839.8795   | 896.0937  | 916.7953  | 1023.9198 | 1060.5802 | 1076.6980 |
| 1085.2648  | 1106.4208 | 1135.7906 | 1143.7225 | 1156.3391 | 1174.4793 |
| 1200.5161  | 1213.1652 | 1246.6397 | 1259.6164 | 1338.2434 | 1373.6485 |
| 1387.7118  | 1397.3950 | 1430.9317 | 1442.9813 | 1450.1063 | 1453.1604 |
| 1455.2305  | 1458.6010 | 1551.0150 | 1821.2855 | 2914.6681 | 2922.0962 |
| 2956.9670  | 2957.2909 | 2962.7094 | 2982.4924 | 3034.6035 | 3034.8549 |
| 3040.6632  | 3048.7904 | 3080.2141 |           |           |           |

=====  
Structure 25  
=====

|            |           |           |           |           |           |
|------------|-----------|-----------|-----------|-----------|-----------|
| 1271.8106i | 38.2688   | 44.6548   | 111.1925  | 135.7118  | 178.6523  |
| 193.8188   | 224.4630  | 257.1706  | 281.6478  | 299.2461  | 366.0251  |
| 467.6103   | 517.0727  | 540.5578  | 587.9826  | 736.9030  | 799.7145  |
| 822.2056   | 872.6484  | 928.7897  | 972.1358  | 1052.9016 | 1068.1798 |
| 1084.7938  | 1111.8975 | 1135.5058 | 1143.5863 | 1162.7374 | 1187.4545 |
| 1203.0898  | 1218.2983 | 1248.3176 | 1320.6616 | 1330.6716 | 1361.5537 |
| 1376.5785  | 1402.5781 | 1431.6538 | 1442.6354 | 1450.4846 | 1453.2043 |
| 1458.1933  | 1459.9436 | 1566.1666 | 1812.1573 | 2949.3101 | 2952.4377 |
| 2956.5694  | 2961.1065 | 2990.8174 | 3005.4068 | 3026.8422 | 3036.9630 |
| 3037.8959  | 3041.4491 | 3081.1825 |           |           |           |

=====  
Structure 26  
=====

|            |           |           |           |           |           |
|------------|-----------|-----------|-----------|-----------|-----------|
| 1304.9295i | 44.0635   | 73.8171   | 102.8718  | 118.8347  | 150.1292  |
| 197.6176   | 237.8014  | 245.7951  | 271.1636  | 314.2289  | 332.9115  |
| 477.5775   | 502.3862  | 531.5822  | 592.1895  | 739.8432  | 816.0959  |
| 846.7420   | 879.1930  | 920.7399  | 977.4633  | 1057.5830 | 1069.8036 |
| 1089.5223  | 1111.2985 | 1135.8128 | 1144.6725 | 1146.3546 | 1183.4199 |
| 1207.4053  | 1211.4650 | 1241.7692 | 1294.5015 | 1324.9932 | 1372.4376 |

|           |           |           |           |           |           |
|-----------|-----------|-----------|-----------|-----------|-----------|
| 1385.9559 | 1396.8523 | 1429.3581 | 1442.8935 | 1451.4065 | 1453.5113 |
| 1457.3621 | 1458.8638 | 1549.7404 | 1821.2268 | 2916.6525 | 2917.9569 |
| 2953.8921 | 2957.3053 | 2986.9978 | 2989.3356 | 3029.3992 | 3034.7525 |
| 3038.8226 | 3058.8822 | 3080.1442 |           |           |           |

=====  
Structure 27  
=====

|            |           |           |           |           |           |
|------------|-----------|-----------|-----------|-----------|-----------|
| 1304.2073i | 38.7507   | 69.2677   | 105.8368  | 120.1171  | 139.6663  |
| 197.9261   | 222.9718  | 232.2668  | 276.3170  | 314.2229  | 359.7870  |
| 427.4402   | 501.9587  | 532.9287  | 589.9713  | 745.9612  | 814.8408  |
| 842.1895   | 881.7901  | 931.9624  | 974.7444  | 1048.3183 | 1076.7456 |
| 1093.3917  | 1108.6655 | 1135.9468 | 1142.7578 | 1154.0626 | 1177.2737 |
| 1202.6386  | 1215.2112 | 1249.2790 | 1295.1015 | 1322.7824 | 1365.9756 |
| 1386.3983  | 1397.0231 | 1437.5212 | 1442.9839 | 1450.8474 | 1453.4107 |
| 1455.1560  | 1458.9078 | 1555.8986 | 1821.0121 | 2927.0387 | 2949.7912 |
| 2953.4946  | 2957.2470 | 2982.9642 | 2994.5779 | 3030.9451 | 3034.6799 |
| 3035.5377  | 3050.0399 | 3080.1252 |           |           |           |

=====  
Structure 28  
=====

|            |           |           |           |           |           |
|------------|-----------|-----------|-----------|-----------|-----------|
| 1275.2593i | 41.6587   | 87.2521   | 100.8548  | 124.5475  | 188.4710  |
| 196.1024   | 222.5247  | 251.7802  | 287.6596  | 299.6228  | 379.6167  |
| 435.8348   | 518.0973  | 532.2288  | 582.5997  | 753.3463  | 794.9733  |
| 833.4248   | 885.8020  | 916.6521  | 977.1840  | 1049.6860 | 1078.6870 |
| 1090.9439  | 1109.2225 | 1135.7134 | 1144.5667 | 1175.9816 | 1186.4579 |
| 1199.2880  | 1217.0432 | 1258.1916 | 1296.6129 | 1326.3225 | 1368.7294 |
| 1377.6006  | 1398.8839 | 1435.8578 | 1442.7432 | 1447.4134 | 1452.0173 |
| 1453.5802  | 1459.2478 | 1564.0888 | 1814.5674 | 2940.2998 | 2944.1681 |
| 2956.1554  | 2958.9778 | 2994.5143 | 2995.3570 | 3030.1919 | 3037.0132 |
| 3044.7675  | 3050.2335 | 3081.0035 |           |           |           |

=====  
Structure 29  
=====

|            |           |           |           |           |           |
|------------|-----------|-----------|-----------|-----------|-----------|
| 1312.8098i | 49.6053   | 91.6508   | 119.6095  | 135.9191  | 166.2393  |
| 202.6540   | 229.8462  | 250.9115  | 282.4389  | 342.4273  | 368.5417  |
| 465.6240   | 488.6149  | 568.1969  | 702.8637  | 739.2474  | 786.1819  |
| 817.3059   | 880.0568  | 931.6652  | 963.1975  | 1048.9108 | 1060.4412 |
| 1095.7266  | 1104.3306 | 1136.0983 | 1142.2719 | 1166.0738 | 1179.1066 |
| 1205.7163  | 1244.0306 | 1249.6895 | 1301.0325 | 1327.2117 | 1341.7838 |
| 1374.5522  | 1425.5888 | 1435.8224 | 1442.0636 | 1447.4714 | 1456.3474 |
| 1459.0770  | 1469.7424 | 1512.3741 | 1806.6852 | 2935.6240 | 2956.1090 |
| 2960.1928  | 2986.7557 | 2999.7370 | 3011.2493 | 3033.6775 | 3039.9630 |



3049.8687      3056.4186      3080.1964

=====  
Structure 30  
=====

|            |           |           |           |           |           |
|------------|-----------|-----------|-----------|-----------|-----------|
| 1310.5882i | 49.0251   | 64.4376   | 89.0481   | 122.4354  | 171.6762  |
| 203.0229   | 222.6569  | 232.8975  | 298.6718  | 307.2818  | 362.7490  |
| 422.6999   | 469.5250  | 568.3773  | 716.3476  | 733.2298  | 783.5984  |
| 825.4791   | 877.8173  | 928.1549  | 1004.0875 | 1047.1202 | 1058.7138 |
| 1081.8810  | 1113.7478 | 1136.4604 | 1152.9123 | 1169.2758 | 1180.7613 |
| 1206.5461  | 1236.7428 | 1251.5628 | 1289.5621 | 1304.3361 | 1365.0677 |
| 1375.8740  | 1429.7343 | 1434.0018 | 1442.3430 | 1451.0285 | 1454.5828 |
| 1457.3528  | 1459.5265 | 1508.3531 | 1809.2511 | 2942.4293 | 2953.8321 |
| 2959.8224  | 2980.4869 | 2993.0220 | 3001.3737 | 3029.1471 | 3039.3529 |
| 3041.3006  | 3051.4306 | 3079.8208 |           |           |           |

=====  
Structure 31  
=====

|            |           |           |           |           |           |
|------------|-----------|-----------|-----------|-----------|-----------|
| 1323.0167i | 34.3792   | 66.4637   | 104.0153  | 128.4676  | 186.6514  |
| 207.9182   | 223.1649  | 240.3041  | 258.6286  | 293.0051  | 368.0880  |
| 405.4099   | 519.1105  | 546.0412  | 616.6867  | 732.6998  | 785.0113  |
| 825.3876   | 878.1150  | 920.4704  | 1007.9788 | 1043.1193 | 1061.4003 |
| 1079.7852  | 1113.6698 | 1135.2071 | 1145.2478 | 1150.2414 | 1169.3362 |
| 1209.6599  | 1224.6201 | 1247.3663 | 1270.9101 | 1356.7971 | 1367.5767 |
| 1376.4231  | 1391.8410 | 1433.9776 | 1442.7616 | 1450.4761 | 1453.0043 |
| 1454.7651  | 1458.6281 | 1605.4817 | 1822.5581 | 2904.2762 | 2928.0052 |
| 2952.7760  | 2957.2202 | 2987.2673 | 3003.7085 | 3014.5731 | 3031.9229 |
| 3034.4026  | 3040.2818 | 3079.2871 |           |           |           |

=====  
Structure 32  
=====

|            |           |           |           |           |           |
|------------|-----------|-----------|-----------|-----------|-----------|
| 1285.6589i | 45.8816   | 89.9465   | 114.2458  | 135.4128  | 180.7495  |
| 205.8382   | 216.4875  | 241.8349  | 314.6355  | 359.7485  | 410.7221  |
| 433.0094   | 466.8672  | 563.0295  | 702.0919  | 750.1711  | 782.6753  |
| 815.9964   | 889.3196  | 933.4923  | 951.5118  | 1035.0577 | 1068.6928 |
| 1091.1763  | 1109.3472 | 1134.5538 | 1139.2369 | 1166.9336 | 1189.6285 |
| 1202.3312  | 1238.4932 | 1260.9227 | 1296.3589 | 1320.6560 | 1357.6697 |
| 1366.5315  | 1428.5828 | 1439.3661 | 1444.6113 | 1447.7343 | 1456.1584 |
| 1460.7254  | 1464.4755 | 1558.9527 | 1806.4898 | 2953.3170 | 2960.6892 |
| 2965.5150  | 2971.2937 | 3004.8505 | 3018.1324 | 3031.9982 | 3036.7800 |
| 3045.4761  | 3049.9881 | 3081.3394 |           |           |           |

Structure 33

```

=====
1316.0553i   34.2113   44.0674   109.1712   146.6984   191.5774
 200.2261   223.6888   236.9898   275.0398   287.6403   389.7375
 430.4414   521.1969   528.8978   602.1889   743.7628   789.8092
 819.8997   877.4523   926.6314   965.4646  1037.0430  1066.4269
1080.8494   1111.8082  1135.0562  1144.8687  1147.9700  1167.0559
1204.2768   1222.4917  1251.8580  1297.4795  1352.8892  1360.9363
1368.0046   1393.5088  1442.5228  1443.4860  1451.1377  1453.4459
1456.2354   1458.2501  1615.3585  1821.6234  2935.8511  2948.7869
2957.0547   2970.7520  2985.7134  3007.7858  3017.3459  3031.7163
3034.0126   3041.8100  3079.1790

```

Structure 34

```

=====
1299.8929i   37.0789   58.1081   98.3551   121.3627   172.1152
 207.0948   212.9275   239.2843   304.4313   355.9906   382.1178
 428.1429   468.6784   562.2007   720.2940   733.3279   779.7300
 820.3841   885.4352   925.9332   997.3146  1028.6089  1059.5479
1092.3593   1112.9395  1137.5209  1142.5421  1167.9318  1192.7548
1202.2077   1240.6440  1255.8425  1260.4129  1328.4212  1366.7481
1377.8711   1427.9681  1431.1504  1443.6505  1450.8682  1454.7210
1456.4915   1461.6032  1537.6666  1809.2736  2929.3778  2953.4226
2960.6548   2969.0255  3000.6779  3013.6863  3030.6240  3041.3276
3041.7867   3044.8798  3080.9540

```

Structure 35

```

=====
1322.4085i   38.3059   87.7686   109.9101   118.9499   168.0337
 191.7192   216.5574   260.6694   286.0025   311.1445   377.3182
 434.0293   468.9369   567.9263   698.9995   755.7477   777.6412
 822.3684   894.2393   929.0075   972.5419  1048.2056  1058.8377
1089.4659   1114.8194  1136.4709  1153.1130  1171.6096  1187.2143
1213.9808   1246.8627  1264.4965  1294.9062  1307.3272  1360.0529
1370.4208   1431.0932  1432.6919  1441.7858  1448.2698  1456.0077
1457.2192   1459.0074  1477.4725  1808.4518  2954.3114  2955.6009
2962.5290   2990.9539  2997.6818  3009.0937  3031.4972  3043.3474
3049.1483   3051.8817  3081.1123

```

Structure 36

|            |           |           |           |           |           |
|------------|-----------|-----------|-----------|-----------|-----------|
| 1296.0474i | 30.8409   | 74.0153   | 101.6276  | 151.4894  | 173.9828  |
| 189.9356   | 208.4219  | 248.5653  | 282.3679  | 311.0310  | 386.7238  |
| 442.7627   | 455.3639  | 567.5655  | 696.0276  | 759.6980  | 794.2624  |
| 822.4695   | 892.0427  | 930.6673  | 964.4899  | 1051.2719 | 1060.7152 |
| 1093.1713  | 1113.9789 | 1137.5353 | 1149.1196 | 1173.8191 | 1181.7061 |
| 1217.1109  | 1226.7134 | 1266.4759 | 1296.3961 | 1301.9097 | 1354.6988 |
| 1373.4616  | 1430.7535 | 1438.7651 | 1444.5354 | 1450.1371 | 1455.5894 |
| 1458.0240  | 1460.4500 | 1498.1064 | 1814.6680 | 2952.8349 | 2956.6616 |
| 2961.0597  | 2968.3386 | 2993.0710 | 3007.0658 | 3035.0504 | 3040.8356 |
| 3043.9762  | 3046.6845 | 3080.7854 |           |           |           |

=====  
Structure 37  
=====

|            |           |           |           |           |           |
|------------|-----------|-----------|-----------|-----------|-----------|
| 1357.1249i | 44.0821   | 64.6693   | 105.4367  | 110.4938  | 161.8733  |
| 192.9559   | 220.7359  | 246.3382  | 307.0998  | 313.8458  | 348.8355  |
| 385.4311   | 462.2836  | 581.0238  | 701.7066  | 737.3639  | 793.6623  |
| 834.1763   | 894.4306  | 917.9224  | 1009.9020 | 1047.9030 | 1066.1750 |
| 1081.6069  | 1113.4703 | 1138.1069 | 1140.4415 | 1161.3137 | 1175.7364 |
| 1200.7657  | 1215.5189 | 1247.4471 | 1285.7424 | 1316.4839 | 1365.4226 |
| 1374.1796  | 1426.2668 | 1434.6553 | 1442.8927 | 1450.0592 | 1454.7606 |
| 1457.1242  | 1459.0490 | 1553.3502 | 1821.9239 | 2917.3821 | 2951.7258 |
| 2956.4701  | 2959.1546 | 2971.3731 | 3008.2511 | 3032.2530 | 3033.3973 |
| 3037.2718  | 3042.9200 | 3079.2006 |           |           |           |

=====  
Structure 38  
=====

|            |           |           |           |           |           |
|------------|-----------|-----------|-----------|-----------|-----------|
| 1349.7503i | 44.5088   | 67.9417   | 114.3952  | 135.0955  | 180.0692  |
| 198.4380   | 213.8479  | 239.2927  | 292.4331  | 316.9344  | 363.5449  |
| 427.1867   | 461.7244  | 576.5464  | 691.5663  | 748.7092  | 795.1880  |
| 840.1394   | 884.7455  | 933.1638  | 962.4783  | 1043.8952 | 1071.0409 |
| 1083.7614  | 1112.3145 | 1134.7688 | 1138.3606 | 1162.4385 | 1177.2754 |
| 1201.1565  | 1216.1812 | 1264.4899 | 1298.6890 | 1306.8670 | 1362.3542 |
| 1365.6607  | 1428.8400 | 1436.7566 | 1442.5894 | 1449.7553 | 1451.6469 |
| 1457.6687  | 1460.6400 | 1557.2344 | 1822.3777 | 2949.0057 | 2955.4805 |
| 2955.9855  | 2959.5829 | 2995.0608 | 3009.1812 | 3028.1488 | 3029.4397 |
| 3033.1986  | 3034.3972 | 3078.5213 |           |           |           |

=====  
Structure 39  
=====

|            |          |          |          |          |          |
|------------|----------|----------|----------|----------|----------|
| 1354.3344i | 35.3741  | 69.3177  | 112.6170 | 129.5232 | 175.2988 |
| 193.8129   | 218.6788 | 238.3284 | 288.6902 | 323.6370 | 335.1747 |
| 461.2434   | 474.0114 | 580.9690 | 691.1362 | 740.2080 | 798.0908 |

|           |           |           |           |           |           |
|-----------|-----------|-----------|-----------|-----------|-----------|
| 844.3492  | 879.6377  | 918.2492  | 963.8117  | 1045.3508 | 1070.1270 |
| 1086.3989 | 1106.6813 | 1131.6108 | 1138.3967 | 1162.6877 | 1177.4856 |
| 1203.8991 | 1225.6796 | 1247.6279 | 1295.9477 | 1326.4290 | 1351.1874 |
| 1375.7980 | 1427.7727 | 1429.9615 | 1442.7363 | 1451.3370 | 1456.8522 |
| 1457.4512 | 1458.7151 | 1551.7273 | 1821.6240 | 2916.0410 | 2946.9225 |
| 2957.6956 | 2958.8093 | 2986.4964 | 3017.2921 | 3033.3952 | 3036.9065 |
| 3038.9728 | 3041.9585 | 3079.1037 |           |           |           |

=====  
Structure 40  
=====

|            |           |           |           |           |           |
|------------|-----------|-----------|-----------|-----------|-----------|
| 1354.5947i | 37.3388   | 77.2210   | 86.3133   | 128.9920  | 161.9704  |
| 209.3281   | 221.6156  | 236.5272  | 298.1238  | 339.4674  | 358.8780  |
| 429.0435   | 467.7187  | 561.7227  | 703.3137  | 742.5283  | 786.2102  |
| 817.7768   | 882.9156  | 920.2400  | 989.8681  | 1044.7806 | 1052.2090 |
| 1091.5429  | 1108.0948 | 1136.6526 | 1137.6263 | 1160.7898 | 1180.5327 |
| 1195.6376  | 1242.1907 | 1256.5102 | 1267.2475 | 1325.6258 | 1363.5514 |
| 1374.0126  | 1427.5684 | 1433.1750 | 1442.5430 | 1449.8004 | 1454.9403 |
| 1457.8675  | 1460.8339 | 1588.8450 | 1817.6823 | 2905.6013 | 2957.1896 |
| 2959.5446  | 2968.8754 | 2973.0444 | 3017.1443 | 3029.1087 | 3034.3335 |
| 3041.9964  | 3044.9129 | 3077.9621 |           |           |           |

=====  
Structure 41  
=====

|            |           |           |           |           |           |
|------------|-----------|-----------|-----------|-----------|-----------|
| 1360.0487i | 57.1739   | 85.1879   | 115.0909  | 161.4381  | 185.6455  |
| 202.0647   | 222.5237  | 264.6222  | 306.3129  | 369.8309  | 384.5460  |
| 454.5619   | 489.3709  | 561.1872  | 699.1576  | 750.4046  | 791.0249  |
| 817.8868   | 886.9127  | 927.8930  | 961.3829  | 1041.6881 | 1068.4279 |
| 1087.9920  | 1109.3271 | 1137.1060 | 1145.1766 | 1178.2235 | 1183.5477 |
| 1222.7349  | 1242.2674 | 1258.1867 | 1296.7498 | 1325.0135 | 1330.2332 |
| 1383.2599  | 1425.8447 | 1431.2155 | 1443.4995 | 1451.2509 | 1453.5148 |
| 1455.5670  | 1459.7139 | 1490.0195 | 1814.8351 | 2919.6038 | 2960.5002 |
| 2961.3162  | 2981.9623 | 2985.6284 | 3018.9719 | 3038.6868 | 3038.8481 |
| 3042.4267  | 3049.3617 | 3081.2924 |           |           |           |

=====  
Structure 42  
=====

|            |           |           |           |           |           |
|------------|-----------|-----------|-----------|-----------|-----------|
| 1337.0020i | 40.5906   | 90.3512   | 99.7914   | 130.1408  | 200.0707  |
| 215.9418   | 223.9113  | 257.4719  | 299.2626  | 321.4213  | 359.0937  |
| 450.2818   | 515.5989  | 555.5238  | 602.0571  | 740.4287  | 778.7718  |
| 824.9732   | 875.6378  | 920.0328  | 974.0375  | 1041.1331 | 1069.8180 |
| 1080.9199  | 1099.9221 | 1135.1398 | 1141.2517 | 1147.8991 | 1169.5673 |
| 1203.1591  | 1224.3071 | 1250.7907 | 1327.0914 | 1335.1373 | 1352.2579 |

|           |           |           |           |           |           |
|-----------|-----------|-----------|-----------|-----------|-----------|
| 1379.8922 | 1394.2044 | 1427.3375 | 1441.9850 | 1447.3015 | 1453.1195 |
| 1453.3143 | 1459.3509 | 1646.0107 | 1827.4230 | 2905.4509 | 2927.3645 |
| 2956.4241 | 2958.6751 | 2981.3182 | 2987.0585 | 3024.7671 | 3029.9796 |
| 3033.5944 | 3055.9581 | 3077.5242 |           |           |           |

=====  
Structure 43  
=====

|            |           |           |           |           |           |
|------------|-----------|-----------|-----------|-----------|-----------|
| 1286.7159i | 22.4202   | 97.7300   | 123.6994  | 127.1159  | 165.6231  |
| 194.1640   | 226.2108  | 286.2236  | 296.5292  | 346.7272  | 362.3903  |
| 458.8974   | 490.9344  | 562.0543  | 697.3691  | 761.2393  | 773.4142  |
| 816.8835   | 891.1958  | 922.3878  | 961.4830  | 1041.6709 | 1070.2605 |
| 1085.9959  | 1106.6324 | 1137.9838 | 1140.7289 | 1164.4066 | 1179.0947 |
| 1222.3840  | 1246.0859 | 1270.2238 | 1294.5109 | 1321.1255 | 1354.6501 |
| 1376.6673  | 1427.7341 | 1429.7252 | 1445.1928 | 1452.4927 | 1455.7986 |
| 1458.5491  | 1460.5167 | 1553.4921 | 1806.8386 | 2943.3465 | 2961.4476 |
| 2963.6542  | 2972.7529 | 3000.0044 | 3022.1214 | 3024.2911 | 3039.5482 |
| 3046.6788  | 3054.2678 | 3081.7443 |           |           |           |

### S.3.5 $(TS_\gamma)^\ddagger$

=====  
Structure 1  
=====

|            |           |           |           |           |           |
|------------|-----------|-----------|-----------|-----------|-----------|
| 1260.5365i | 36.7298   | 64.9666   | 94.5462   | 137.0309  | 168.1441  |
| 189.4699   | 204.5872  | 238.1479  | 289.5526  | 316.0734  | 329.7603  |
| 357.0336   | 509.0859  | 572.5726  | 642.9353  | 779.4847  | 827.5406  |
| 837.4953   | 905.5735  | 931.6276  | 998.7730  | 1032.1613 | 1060.8198 |
| 1080.3320  | 1110.5785 | 1145.8316 | 1151.4564 | 1174.2813 | 1192.4629 |
| 1204.8761  | 1229.5017 | 1245.6261 | 1282.5478 | 1359.1443 | 1373.1140 |
| 1381.0038  | 1411.4644 | 1418.6393 | 1437.8428 | 1439.2373 | 1441.3054 |
| 1443.6366  | 1454.5685 | 1541.6290 | 1794.2997 | 2940.0970 | 2944.4885 |
| 2974.5722  | 2981.7562 | 2992.6517 | 3009.0808 | 3022.5639 | 3031.4067 |
| 3044.2487  | 3064.9893 | 3098.1514 |           |           |           |

=====  
Structure 2  
=====

|            |           |           |           |           |           |
|------------|-----------|-----------|-----------|-----------|-----------|
| 1287.2361i | 29.5595   | 61.2951   | 101.2013  | 107.2320  | 135.5803  |
| 171.6769   | 192.2240  | 241.9456  | 277.7155  | 322.6282  | 335.3721  |
| 343.3012   | 475.0873  | 568.5678  | 688.7986  | 740.0742  | 810.2386  |
| 880.1010   | 911.1283  | 921.7603  | 1012.1218 | 1035.8327 | 1069.8997 |
| 1085.9597  | 1107.3721 | 1146.0083 | 1150.8265 | 1172.7576 | 1196.5731 |

|           |           |           |           |           |           |
|-----------|-----------|-----------|-----------|-----------|-----------|
| 1203.3669 | 1211.8814 | 1263.3643 | 1268.8000 | 1342.9023 | 1372.6756 |
| 1391.3499 | 1414.0310 | 1429.2267 | 1438.5926 | 1439.9285 | 1441.0184 |
| 1444.1708 | 1454.9195 | 1528.1881 | 1797.7674 | 2940.8401 | 2944.7715 |
| 2971.0050 | 2981.3274 | 2991.5981 | 3004.8712 | 3013.4871 | 3018.7065 |
| 3043.0960 | 3064.4373 | 3097.3962 |           |           |           |

=====  
Structure 3  
=====

|            |           |           |           |           |           |
|------------|-----------|-----------|-----------|-----------|-----------|
| 1279.8611i | 32.5613   | 47.0055   | 102.9817  | 137.3243  | 165.7200  |
| 177.3080   | 210.8883  | 244.7615  | 285.8598  | 317.6139  | 361.1674  |
| 384.6066   | 493.9403  | 573.4339  | 646.6538  | 786.5326  | 821.7057  |
| 843.3950   | 903.0114  | 931.8983  | 976.8198  | 1030.4000 | 1039.0196 |
| 1079.9854  | 1114.0525 | 1145.9623 | 1161.8093 | 1172.8497 | 1183.4504 |
| 1197.4124  | 1227.1379 | 1245.1647 | 1307.6153 | 1348.4798 | 1370.6635 |
| 1374.4219  | 1412.1513 | 1426.5349 | 1437.5717 | 1438.7050 | 1441.1422 |
| 1447.2212  | 1454.6054 | 1545.1899 | 1796.4387 | 2938.4034 | 2963.0808 |
| 2973.9418  | 2981.8962 | 3004.7429 | 3015.7298 | 3028.4868 | 3033.5151 |
| 3046.8485  | 3065.3039 | 3098.2424 |           |           |           |

=====  
Structure 4  
=====

|            |           |           |           |           |           |
|------------|-----------|-----------|-----------|-----------|-----------|
| 1271.0586i | 33.8362   | 88.1778   | 105.7397  | 139.7601  | 170.6314  |
| 210.0004   | 240.5588  | 255.2985  | 296.0201  | 302.8648  | 342.2103  |
| 397.6251   | 514.1894  | 571.6008  | 657.2342  | 799.7735  | 807.6525  |
| 846.9923   | 913.6666  | 926.5923  | 966.1349  | 1031.5158 | 1053.6035 |
| 1081.5731  | 1107.8107 | 1146.0022 | 1150.7009 | 1173.8084 | 1193.5341 |
| 1210.3423  | 1216.5055 | 1246.2273 | 1330.3384 | 1335.3870 | 1371.8904 |
| 1376.2411  | 1413.4374 | 1420.9340 | 1437.3357 | 1440.2415 | 1441.6713 |
| 1448.2191  | 1454.4333 | 1522.5593 | 1794.1935 | 2945.1625 | 2952.2364 |
| 2972.2416  | 2981.7998 | 3005.5805 | 3012.3345 | 3023.6216 | 3025.6363 |
| 3040.3437  | 3065.2020 | 3098.2336 |           |           |           |

=====  
Structure 5  
=====

|            |           |           |           |           |           |
|------------|-----------|-----------|-----------|-----------|-----------|
| 1284.2526i | 27.6158   | 58.0130   | 97.4780   | 131.2487  | 134.8273  |
| 170.7106   | 201.7599  | 226.0600  | 293.6869  | 304.8432  | 328.6951  |
| 412.5810   | 474.5644  | 571.2808  | 695.4204  | 743.9537  | 807.7460  |
| 866.6562   | 908.1519  | 928.6577  | 968.4993  | 1036.1537 | 1061.1128 |
| 1099.9836  | 1102.6871 | 1142.9571 | 1146.3501 | 1172.8228 | 1190.3198 |
| 1204.1878  | 1212.5381 | 1267.8215 | 1304.4578 | 1327.5896 | 1372.8327 |
| 1384.6572  | 1414.6488 | 1428.7524 | 1439.0023 | 1440.8373 | 1442.0148 |
| 1446.4831  | 1454.8782 | 1536.8829 | 1797.6229 | 2937.8280 | 2941.2012 |

|           |           |           |           |           |           |
|-----------|-----------|-----------|-----------|-----------|-----------|
| 2973.6983 | 2981.3236 | 3005.2105 | 3011.4698 | 3023.1101 | 3025.5833 |
| 3045.3734 | 3064.4204 | 3097.3637 |           |           |           |

=====  
 Structure 6  
 =====

|            |           |           |           |           |           |
|------------|-----------|-----------|-----------|-----------|-----------|
| 1290.2355i | 25.5738   | 58.5670   | 90.3651   | 119.3997  | 135.8677  |
| 172.3919   | 193.8854  | 229.8097  | 278.0615  | 311.3760  | 355.5170  |
| 400.5419   | 449.0306  | 569.2741  | 690.0501  | 749.9533  | 812.1177  |
| 867.6262   | 905.2875  | 923.8644  | 985.9014  | 1027.3074 | 1068.7063 |
| 1091.1834  | 1094.0913 | 1146.0542 | 1171.0511 | 1174.7733 | 1184.4576 |
| 1203.8019  | 1207.9387 | 1269.2139 | 1285.6150 | 1338.4995 | 1369.6992 |
| 1381.3083  | 1412.3877 | 1433.5939 | 1437.8345 | 1441.0711 | 1442.0076 |
| 1446.0431  | 1454.8970 | 1547.4328 | 1799.2375 | 2940.0993 | 2968.8212 |
| 2976.2165  | 2981.6334 | 3001.8246 | 3007.5309 | 3013.6870 | 3030.2098 |
| 3040.1074  | 3064.9459 | 3097.6496 |           |           |           |

=====  
 Structure 7  
 =====

|            |           |           |           |           |           |
|------------|-----------|-----------|-----------|-----------|-----------|
| 1296.8820i | 34.1576   | 80.5108   | 92.5176   | 141.6413  | 174.4447  |
| 194.1326   | 204.3268  | 250.8395  | 291.7247  | 338.3873  | 369.5893  |
| 396.8929   | 473.3925  | 600.4951  | 677.6146  | 792.0546  | 825.4127  |
| 841.4109   | 882.5396  | 928.6862  | 995.1403  | 1034.0042 | 1050.3171 |
| 1085.1265  | 1102.6995 | 1145.6111 | 1168.4347 | 1176.9756 | 1192.4931 |
| 1200.0921  | 1210.0235 | 1262.8924 | 1297.6654 | 1336.3381 | 1361.2504 |
| 1378.4441  | 1421.9032 | 1425.8181 | 1436.6406 | 1439.9445 | 1440.6751 |
| 1443.6430  | 1451.8953 | 1536.6005 | 1800.9342 | 2931.0293 | 2941.2067 |
| 2979.9496  | 2983.7047 | 2994.6616 | 3008.5726 | 3017.2001 | 3043.7522 |
| 3050.2521  | 3064.1185 | 3096.3458 |           |           |           |

=====  
 Structure 8  
 =====

|            |           |           |           |           |           |
|------------|-----------|-----------|-----------|-----------|-----------|
| 1301.6843i | 17.6344   | 55.4529   | 91.0164   | 140.5437  | 174.8830  |
| 193.1040   | 212.7548  | 250.1785  | 294.8851  | 326.7307  | 356.0366  |
| 374.5740   | 485.5849  | 580.7094  | 672.6559  | 783.9470  | 822.1400  |
| 845.8173   | 910.5964  | 926.7190  | 1001.4860 | 1027.2343 | 1045.8272 |
| 1085.9886  | 1097.8242 | 1145.6638 | 1169.4479 | 1176.1351 | 1191.5889 |
| 1207.8324  | 1216.2964 | 1251.8553 | 1279.2679 | 1353.9259 | 1368.6535 |
| 1380.4398  | 1420.1610 | 1425.2777 | 1438.0455 | 1440.0715 | 1440.3093 |
| 1443.0188  | 1453.1096 | 1547.9607 | 1796.8852 | 2933.3882 | 2939.1774 |
| 2975.9172  | 2981.2539 | 2997.1366 | 3009.2184 | 3013.4664 | 3035.7626 |
| 3043.9834  | 3065.3756 | 3097.7006 |           |           |           |

=====  
 Structure 9  
 =====

|            |           |           |           |           |           |
|------------|-----------|-----------|-----------|-----------|-----------|
| 1287.1881i | 31.7079   | 63.8458   | 77.1216   | 138.0284  | 177.0266  |
| 186.1531   | 201.0413  | 243.9830  | 296.7384  | 316.7869  | 332.8403  |
| 373.1371   | 513.5998  | 585.4510  | 638.4456  | 783.0556  | 827.1664  |
| 840.0434   | 873.6006  | 931.0007  | 989.7393  | 1046.6092 | 1062.7607 |
| 1085.3256  | 1106.0540 | 1146.3693 | 1152.0251 | 1175.7173 | 1190.2128 |
| 1201.7217  | 1228.8019 | 1266.1432 | 1299.7599 | 1335.2431 | 1360.4752 |
| 1380.5262  | 1416.3695 | 1423.7992 | 1435.2327 | 1439.9167 | 1440.2192 |
| 1443.5512  | 1454.5369 | 1540.6837 | 1799.4026 | 2940.4308 | 2947.6493 |
| 2974.8825  | 2981.6853 | 2990.2866 | 3007.4358 | 3015.9974 | 3042.4431 |
| 3042.8103  | 3065.2546 | 3096.9050 |           |           |           |

=====  
 Structure 10  
 =====

|            |           |           |           |           |           |
|------------|-----------|-----------|-----------|-----------|-----------|
| 1289.3960i | 57.8831   | 80.4101   | 129.9693  | 147.1859  | 161.3674  |
| 191.2420   | 229.4763  | 293.0408  | 305.4366  | 316.1628  | 360.3790  |
| 417.4081   | 508.6389  | 602.9793  | 692.2634  | 789.7085  | 815.0645  |
| 843.7397   | 890.1586  | 929.6473  | 967.9237  | 1013.5955 | 1056.1526 |
| 1087.7661  | 1103.7926 | 1145.6173 | 1149.5656 | 1173.0684 | 1178.7511 |
| 1211.0411  | 1220.3095 | 1279.0794 | 1315.9754 | 1337.9467 | 1349.8005 |
| 1375.4881  | 1420.7495 | 1426.8788 | 1438.1849 | 1440.3002 | 1442.5954 |
| 1452.1193  | 1454.9635 | 1535.6814 | 1796.4153 | 2933.8490 | 2935.4479 |
| 2980.3206  | 2993.0624 | 3003.3761 | 3013.6267 | 3019.7127 | 3048.8963 |
| 3059.0271  | 3064.8129 | 3097.0457 |           |           |           |

=====  
 Structure 11  
 =====

|            |           |           |           |           |           |
|------------|-----------|-----------|-----------|-----------|-----------|
| 1289.8738i | 27.6511   | 62.8320   | 99.9372   | 138.7830  | 167.8266  |
| 209.8668   | 227.9312  | 240.5981  | 287.1014  | 305.8417  | 367.8274  |
| 379.5161   | 489.8108  | 570.2053  | 663.8471  | 797.1152  | 813.5651  |
| 845.8260   | 912.2130  | 918.1564  | 982.7162  | 1025.5756 | 1042.8445 |
| 1087.8490  | 1104.8176 | 1146.0688 | 1161.7507 | 1173.5225 | 1195.8725 |
| 1205.6369  | 1219.6114 | 1249.1596 | 1305.1657 | 1347.7564 | 1367.5015 |
| 1379.2765  | 1414.3268 | 1428.1085 | 1435.0303 | 1437.4322 | 1440.9129 |
| 1446.7407  | 1454.3432 | 1537.1626 | 1796.3868 | 2938.3006 | 2965.3273 |
| 2973.7894  | 2981.9598 | 2999.3774 | 3010.4589 | 3021.7671 | 3030.1194 |
| 3049.5843  | 3065.5056 | 3098.4402 |           |           |           |

=====  
 Structure 12  
 =====



|            |           |           |           |           |           |
|------------|-----------|-----------|-----------|-----------|-----------|
| 1293.7738i | 23.5226   | 65.9266   | 92.9909   | 108.2972  | 139.5875  |
| 182.0782   | 193.4524  | 241.5488  | 286.8483  | 320.9682  | 334.8161  |
| 361.4428   | 444.0812  | 625.7893  | 699.0800  | 742.3142  | 810.0422  |
| 865.8411   | 890.3437  | 927.6054  | 1017.8283 | 1043.8191 | 1063.5596 |
| 1088.0677  | 1108.7371 | 1146.3140 | 1152.1634 | 1176.0897 | 1196.9620 |
| 1209.8099  | 1226.7832 | 1259.1576 | 1300.5031 | 1323.8133 | 1365.0112 |
| 1378.9674  | 1422.2884 | 1433.8918 | 1435.6495 | 1440.1053 | 1440.6289 |
| 1443.9506  | 1454.4754 | 1531.7071 | 1799.1365 | 2925.5575 | 2940.9905 |
| 2972.5789  | 2981.6524 | 2999.0871 | 3008.4951 | 3015.4649 | 3043.2829 |
| 3046.0254  | 3065.1149 | 3097.2128 |           |           |           |

=====  
Structure 13  
=====

|            |           |           |           |           |           |
|------------|-----------|-----------|-----------|-----------|-----------|
| 1298.3368i | 19.9103   | 65.2955   | 92.6329   | 108.3265  | 139.0156  |
| 185.1830   | 191.4678  | 234.7416  | 292.3731  | 322.7843  | 332.2858  |
| 361.8766   | 442.3297  | 624.2790  | 692.8565  | 747.9004  | 807.9566  |
| 865.6593   | 892.6244  | 924.3429  | 1011.2383 | 1045.0362 | 1077.2167 |
| 1085.6014  | 1102.4538 | 1146.2522 | 1153.1567 | 1175.6113 | 1196.7248 |
| 1210.3343  | 1223.8807 | 1262.5802 | 1297.7713 | 1322.4678 | 1365.2065 |
| 1380.1543  | 1422.2031 | 1433.7441 | 1435.3364 | 1440.0996 | 1440.4372 |
| 1443.9437  | 1454.4899 | 1534.3957 | 1800.4218 | 2940.4563 | 2945.3854 |
| 2966.2542  | 2981.6257 | 2985.9800 | 3005.6363 | 3013.9054 | 3043.0170 |
| 3049.7588  | 3065.2158 | 3096.8830 |           |           |           |

=====  
Structure 14  
=====

|            |           |           |           |           |           |
|------------|-----------|-----------|-----------|-----------|-----------|
| 1281.3494i | 16.9635   | 53.5520   | 90.9758   | 136.2535  | 153.9539  |
| 173.3704   | 216.3416  | 264.4145  | 290.2366  | 305.2394  | 366.4609  |
| 410.7379   | 465.9310  | 604.4230  | 693.8954  | 790.4508  | 821.7389  |
| 843.6246   | 886.5363  | 928.5745  | 971.4025  | 1033.8422 | 1035.1673 |
| 1093.2835  | 1104.5884 | 1146.0633 | 1151.7287 | 1175.3816 | 1180.9356 |
| 1195.2205  | 1219.6931 | 1273.7248 | 1315.4165 | 1321.7357 | 1356.2150 |
| 1373.8734  | 1424.8361 | 1430.3740 | 1435.9041 | 1440.6698 | 1443.4203 |
| 1451.9323  | 1454.5881 | 1551.9389 | 1796.2912 | 2941.9888 | 2965.7029 |
| 2981.3973  | 2989.1851 | 3004.6719 | 3014.2435 | 3024.9718 | 3039.4788 |
| 3059.4479  | 3064.6160 | 3097.9291 |           |           |           |

=====  
Structure 15  
=====

|            |          |          |          |          |          |
|------------|----------|----------|----------|----------|----------|
| 1296.3412i | 49.8822  | 83.3921  | 132.1386 | 144.7927 | 159.2430 |
| 205.3606   | 230.5260 | 293.3563 | 299.9160 | 313.0455 | 360.7828 |

|           |           |           |           |           |           |
|-----------|-----------|-----------|-----------|-----------|-----------|
| 417.4299  | 497.5106  | 607.1031  | 711.4202  | 788.7719  | 815.6162  |
| 846.2282  | 891.3243  | 942.8588  | 960.9791  | 1024.7876 | 1038.9002 |
| 1090.5089 | 1099.5873 | 1145.4905 | 1150.4487 | 1168.5982 | 1179.2108 |
| 1210.9229 | 1215.7655 | 1260.4650 | 1327.4332 | 1335.1231 | 1353.3241 |
| 1372.7093 | 1422.5764 | 1426.5702 | 1439.5008 | 1439.7554 | 1442.8915 |
| 1451.4243 | 1457.5681 | 1541.9334 | 1798.7228 | 2932.8836 | 2936.4627 |
| 2981.0207 | 2997.9781 | 3006.1812 | 3015.0772 | 3020.7724 | 3049.0619 |
| 3058.1435 | 3065.9081 | 3097.5475 |           |           |           |

=====  
Structure 16  
=====

|            |           |           |           |           |           |
|------------|-----------|-----------|-----------|-----------|-----------|
| 1290.6800i | 52.3459   | 59.9855   | 80.7679   | 140.1108  | 169.8281  |
| 200.5695   | 236.6810  | 244.4469  | 291.4916  | 305.1822  | 373.5985  |
| 397.5109   | 479.1115  | 593.1043  | 671.3358  | 805.7269  | 809.5728  |
| 842.9171   | 883.3370  | 919.4653  | 984.3779  | 1025.0391 | 1041.7103 |
| 1098.5837  | 1103.7059 | 1145.7785 | 1165.7781 | 1176.0368 | 1200.0356 |
| 1207.5785  | 1221.1851 | 1275.1435 | 1306.1027 | 1339.0033 | 1354.3652 |
| 1376.4667  | 1420.2200 | 1429.5630 | 1431.7328 | 1440.1605 | 1441.3596 |
| 1450.7790  | 1455.4822 | 1519.9319 | 1796.1553 | 2941.8176 | 2966.9282 |
| 2975.2954  | 2978.6990 | 3003.5514 | 3013.0945 | 3021.9366 | 3039.3508 |
| 3048.0785  | 3061.5969 | 3096.8873 |           |           |           |

=====  
Structure 17  
=====

|            |           |           |           |           |           |
|------------|-----------|-----------|-----------|-----------|-----------|
| 1293.9282i | 22.8529   | 53.7342   | 93.1806   | 107.2113  | 138.2605  |
| 183.7056   | 203.0850  | 231.1791  | 282.5264  | 303.4010  | 360.5844  |
| 403.8936   | 431.8572  | 630.6065  | 716.3185  | 747.0859  | 811.2131  |
| 865.9398   | 877.1168  | 932.3561  | 983.1215  | 1040.0485 | 1049.9303 |
| 1092.4762  | 1103.2175 | 1146.1938 | 1174.3710 | 1175.5695 | 1185.2493 |
| 1204.1378  | 1234.3484 | 1271.0226 | 1302.9446 | 1328.5899 | 1349.9840 |
| 1375.2245  | 1423.3119 | 1434.1576 | 1437.8257 | 1440.5639 | 1444.8022 |
| 1447.6620  | 1454.5479 | 1539.7573 | 1798.9630 | 2941.5945 | 2964.4574 |
| 2981.0340  | 2981.8109 | 3004.3609 | 3011.4859 | 3021.1873 | 3041.2222 |
| 3052.3413  | 3065.2506 | 3097.6167 |           |           |           |

=====  
Structure 18  
=====

|            |           |           |           |           |           |
|------------|-----------|-----------|-----------|-----------|-----------|
| 1292.4605i | 21.9638   | 52.7908   | 90.0281   | 110.1753  | 138.9018  |
| 184.4033   | 204.2223  | 223.6951  | 285.6727  | 304.9695  | 367.3890  |
| 404.6716   | 421.1659  | 631.1282  | 709.8604  | 758.3045  | 813.3185  |
| 867.6824   | 875.4867  | 926.6782  | 983.1514  | 1035.9848 | 1055.1937 |
| 1092.8773  | 1103.3158 | 1146.2996 | 1172.1750 | 1176.8649 | 1184.8237 |

|           |           |           |           |           |           |
|-----------|-----------|-----------|-----------|-----------|-----------|
| 1204.2436 | 1238.2010 | 1265.0539 | 1308.4165 | 1324.2178 | 1352.1128 |
| 1376.3229 | 1423.6056 | 1434.5758 | 1437.5801 | 1440.6684 | 1444.4799 |
| 1447.7980 | 1454.6056 | 1539.7857 | 1799.1293 | 2942.8333 | 2959.1938 |
| 2977.3801 | 2981.7564 | 3004.3420 | 3012.7936 | 3022.6873 | 3041.3640 |
| 3058.5984 | 3065.1963 | 3097.7171 |           |           |           |

=====  
Structure 19  
=====

|            |           |           |           |           |           |
|------------|-----------|-----------|-----------|-----------|-----------|
| 1291.0840i | 23.2462   | 51.8891   | 97.5316   | 122.7147  | 139.1388  |
| 193.4848   | 203.7178  | 224.5897  | 290.5747  | 302.8686  | 329.5775  |
| 423.3715   | 459.4661  | 625.2681  | 701.6329  | 752.0996  | 809.5027  |
| 865.8261   | 875.2756  | 931.5090  | 971.7523  | 1037.8068 | 1070.5330 |
| 1097.4357  | 1101.6095 | 1144.8825 | 1146.3574 | 1176.1681 | 1189.9406 |
| 1204.7854  | 1247.4944 | 1265.6849 | 1305.6356 | 1332.5077 | 1357.8154 |
| 1374.3502  | 1422.8244 | 1434.0131 | 1437.3058 | 1440.3471 | 1442.1470 |
| 1446.7013  | 1454.5088 | 1539.5870 | 1798.5914 | 2923.9264 | 2939.3121 |
| 2972.5894  | 2981.5275 | 3011.8049 | 3015.7073 | 3024.2612 | 3046.2185 |
| 3058.9594  | 3064.9454 | 3097.1794 |           |           |           |

=====  
Structure 20  
=====

|            |           |           |           |           |           |
|------------|-----------|-----------|-----------|-----------|-----------|
| 1288.1424i | 47.2408   | 70.1997   | 90.5248   | 139.5765  | 175.9951  |
| 202.8226   | 232.5749  | 247.7247  | 294.7379  | 302.3029  | 341.6746  |
| 414.3597   | 519.9186  | 578.1310  | 650.9752  | 803.1451  | 804.8633  |
| 846.3215   | 879.2282  | 922.5034  | 967.2659  | 1030.2426 | 1068.4189 |
| 1081.4464  | 1107.6365 | 1145.9403 | 1151.4987 | 1175.9047 | 1194.7663 |
| 1209.2696  | 1219.5693 | 1279.1836 | 1330.8549 | 1335.9679 | 1344.6598 |
| 1375.2613  | 1415.0471 | 1423.9971 | 1434.4588 | 1440.0491 | 1443.2102 |
| 1451.9124  | 1454.5707 | 1529.2251 | 1795.6443 | 2941.0729 | 2953.4562 |
| 2972.2373  | 2980.9940 | 3001.1537 | 3012.8524 | 3020.7715 | 3039.6579 |
| 3043.2180  | 3064.5471 | 3096.4585 |           |           |           |

=====  
Structure 21  
=====

|            |           |           |           |           |           |
|------------|-----------|-----------|-----------|-----------|-----------|
| 1248.4047i | 46.2825   | 68.0400   | 106.6789  | 128.2285  | 191.3366  |
| 194.4915   | 226.5004  | 246.6357  | 275.4617  | 317.0660  | 331.4562  |
| 410.0350   | 529.2638  | 549.4076  | 584.3985  | 750.5412  | 806.9135  |
| 833.3842   | 883.5259  | 932.0848  | 1008.2300 | 1055.1597 | 1075.7482 |
| 1086.5832  | 1112.6707 | 1137.4708 | 1144.8560 | 1157.2583 | 1196.6954 |
| 1206.4853  | 1228.0972 | 1245.7363 | 1284.6099 | 1359.5325 | 1370.5469 |
| 1380.7883  | 1405.9906 | 1417.4587 | 1438.8921 | 1443.6441 | 1445.1333 |
| 1455.1891  | 1460.5317 | 1538.9689 | 1815.6887 | 2941.2077 | 2949.0705 |

|           |           |           |           |           |           |
|-----------|-----------|-----------|-----------|-----------|-----------|
| 2959.9801 | 2964.1511 | 2994.3454 | 3009.9178 | 3010.3286 | 3035.4404 |
| 3040.4679 | 3047.5407 | 3083.7692 |           |           |           |

=====  
 Structure 22  
 =====

|            |           |           |           |           |           |
|------------|-----------|-----------|-----------|-----------|-----------|
| 1281.2200i | 38.9107   | 75.8298   | 98.3786   | 107.5896  | 126.7267  |
| 191.4067   | 197.6699  | 244.9156  | 273.6576  | 324.0033  | 337.3055  |
| 396.9596   | 525.5674  | 534.5566  | 587.0872  | 744.9025  | 812.0382  |
| 839.0437   | 896.2639  | 921.8197  | 1023.4691 | 1063.3302 | 1082.6260 |
| 1087.2081  | 1107.1041 | 1136.5383 | 1143.1005 | 1154.6820 | 1198.3116 |
| 1206.4550  | 1213.3722 | 1261.6573 | 1273.1396 | 1341.4688 | 1372.7644 |
| 1389.1261  | 1408.6063 | 1428.4568 | 1439.3442 | 1443.6453 | 1444.8914 |
| 1455.2429  | 1459.2978 | 1526.5997 | 1819.1527 | 2942.2625 | 2950.7391 |
| 2956.5568  | 2962.6060 | 2992.6192 | 3001.1939 | 3012.2405 | 3015.6160 |
| 3039.1009  | 3044.1420 | 3083.6990 |           |           |           |

=====  
 Structure 23  
 =====

|            |           |           |           |           |           |
|------------|-----------|-----------|-----------|-----------|-----------|
| 1278.8902i | 34.1389   | 74.9868   | 93.5708   | 116.7567  | 136.8797  |
| 193.8825   | 206.0835  | 244.3339  | 296.3808  | 299.2449  | 331.1037  |
| 471.0177   | 505.5398  | 536.1748  | 593.3810  | 748.5361  | 808.5635  |
| 843.5031   | 879.5590  | 929.3824  | 977.1224  | 1055.9486 | 1084.1946 |
| 1101.6902  | 1103.2000 | 1136.5325 | 1140.6284 | 1147.8384 | 1191.3773 |
| 1203.6294  | 1214.8343 | 1274.2435 | 1300.2919 | 1327.7333 | 1372.7410 |
| 1381.8909  | 1409.1956 | 1427.9833 | 1441.6959 | 1444.2942 | 1446.2772 |
| 1455.4810  | 1459.6583 | 1536.5204 | 1818.9956 | 2938.7585 | 2949.0183 |
| 2959.1776  | 2964.1097 | 3000.2945 | 3010.5543 | 3020.6650 | 3027.5022 |
| 3038.7143  | 3045.0211 | 3083.5737 |           |           |           |

=====  
 Structure 24  
 =====

|            |           |           |           |           |           |
|------------|-----------|-----------|-----------|-----------|-----------|
| 1281.0800i | 42.2366   | 46.1120   | 110.5256  | 128.4452  | 188.2149  |
| 193.5745   | 223.6345  | 243.6087  | 278.0027  | 315.4369  | 371.2459  |
| 419.2943   | 525.5226  | 541.8905  | 585.6559  | 754.0338  | 814.0132  |
| 828.3490   | 883.3190  | 930.4086  | 986.5689  | 1035.1367 | 1071.3355 |
| 1087.7699  | 1114.9796 | 1136.9524 | 1147.5534 | 1164.2339 | 1187.3386 |
| 1196.2068  | 1224.8991 | 1246.9002 | 1309.0847 | 1349.0420 | 1368.2177 |
| 1374.5975  | 1405.8572 | 1425.7301 | 1437.6726 | 1444.5675 | 1447.3114 |
| 1455.1225  | 1459.9684 | 1544.3560 | 1817.7193 | 2936.0073 | 2956.4242 |
| 2961.2967  | 2966.4697 | 3001.8670 | 3006.0964 | 3026.9938 | 3035.2494 |
| 3038.5446  | 3055.0963 | 3083.5074 |           |           |           |

=====  
 Structure 25  
 =====

|            |           |           |           |           |           |
|------------|-----------|-----------|-----------|-----------|-----------|
| 1255.0108i | 46.6560   | 97.9962   | 109.7173  | 137.9193  | 198.9054  |
| 226.0072   | 246.1422  | 253.3345  | 295.4960  | 301.1125  | 343.7970  |
| 451.9709   | 528.2947  | 555.6001  | 576.0657  | 759.4342  | 805.9805  |
| 828.7938   | 894.5187  | 926.8566  | 975.6789  | 1049.3535 | 1072.5959 |
| 1092.4182  | 1110.8706 | 1137.0965 | 1143.3631 | 1158.2555 | 1200.0456 |
| 1211.1315  | 1217.0199 | 1244.6659 | 1331.5920 | 1336.4095 | 1369.7889 |
| 1377.1381  | 1406.3180 | 1419.6383 | 1437.0511 | 1443.7927 | 1445.0217 |
| 1455.2199  | 1461.0438 | 1515.6441 | 1815.8317 | 2951.0093 | 2958.4301 |
| 2960.3721  | 2963.5295 | 3007.0342 | 3010.7996 | 3016.9457 | 3027.2347 |
| 3040.5711  | 3042.0196 | 3083.5625 |           |           |           |

=====  
 Structure 26  
 =====

|            |           |           |           |           |           |
|------------|-----------|-----------|-----------|-----------|-----------|
| 1295.4979i | 31.3840   | 75.8476   | 91.0791   | 117.1985  | 126.9054  |
| 194.0247   | 203.4895  | 247.5277  | 265.7550  | 313.5913  | 369.9815  |
| 422.9391   | 510.0576  | 533.3474  | 588.6250  | 754.1239  | 812.5868  |
| 839.9519   | 877.8754  | 924.6370  | 993.5920  | 1054.2675 | 1082.9682 |
| 1092.0356  | 1096.3261 | 1136.8386 | 1144.8377 | 1173.9212 | 1184.5006 |
| 1203.4532  | 1210.8187 | 1272.0247 | 1284.3284 | 1337.5503 | 1368.2653 |
| 1379.6841  | 1406.4870 | 1433.9573 | 1440.7173 | 1444.5397 | 1446.0081 |
| 1455.4109  | 1460.0975 | 1545.3498 | 1820.7491 | 2938.3253 | 2955.3861 |
| 2961.8447  | 2980.0240 | 2998.3343 | 3001.9913 | 3010.6624 | 3032.9080 |
| 3037.6125  | 3040.9573 | 3083.4413 |           |           |           |

=====  
 Structure 27  
 =====

|            |           |           |           |           |           |
|------------|-----------|-----------|-----------|-----------|-----------|
| 1290.7747i | 39.8467   | 69.8132   | 103.5377  | 134.4122  | 202.5188  |
| 215.4385   | 229.2919  | 251.3625  | 277.4715  | 307.0669  | 368.8400  |
| 421.5120   | 527.4894  | 540.4936  | 576.5533  | 760.0302  | 809.8764  |
| 824.0359   | 889.7957  | 919.6575  | 999.3481  | 1031.0857 | 1075.9054 |
| 1093.6228  | 1107.1037 | 1137.3702 | 1146.8913 | 1166.8777 | 1200.9593 |
| 1209.3309  | 1218.1791 | 1247.4668 | 1307.2006 | 1348.8091 | 1368.3080 |
| 1381.7795  | 1405.2317 | 1426.5124 | 1433.2884 | 1442.5555 | 1444.6540 |
| 1455.4506  | 1461.3379 | 1531.6202 | 1819.1477 | 2943.0934 | 2953.7770 |
| 2961.1946  | 2974.0943 | 2993.5116 | 3005.1708 | 3013.1960 | 3030.3876 |
| 3038.9842  | 3053.7451 | 3083.0679 |           |           |           |

=====  
 Structure 28  
 =====

|            |           |           |           |           |           |
|------------|-----------|-----------|-----------|-----------|-----------|
| 1271.1032i | 45.3555   | 68.7206   | 113.2992  | 115.5126  | 166.7832  |
| 192.7196   | 206.8569  | 250.0209  | 316.3699  | 324.8221  | 342.4577  |
| 380.5983   | 469.7000  | 583.2044  | 707.2056  | 738.4071  | 804.7455  |
| 833.1525   | 893.2322  | 931.0505  | 1008.3617 | 1044.7296 | 1069.9612 |
| 1094.9403  | 1114.2187 | 1134.3379 | 1138.8701 | 1164.4042 | 1196.8418 |
| 1203.7922  | 1221.9468 | 1248.5505 | 1289.3008 | 1324.1048 | 1362.3416 |
| 1377.8130  | 1431.6049 | 1439.3434 | 1442.6201 | 1443.5057 | 1447.7720 |
| 1461.4695  | 1464.4850 | 1526.1649 | 1817.2049 | 2939.9546 | 2944.1657 |
| 2961.9082  | 2978.6773 | 2997.7562 | 3009.9386 | 3018.0307 | 3040.9661 |
| 3045.2083  | 3056.1795 | 3082.6107 |           |           |           |

=====  
Structure 29  
=====

|            |           |           |           |           |           |
|------------|-----------|-----------|-----------|-----------|-----------|
| 1321.0290i | 44.6528   | 46.9006   | 94.7905   | 132.4011  | 190.6258  |
| 204.7094   | 236.1978  | 251.5730  | 289.6454  | 316.7449  | 366.1250  |
| 411.2676   | 527.0787  | 547.8220  | 581.9860  | 750.8353  | 806.1370  |
| 830.1153   | 886.1099  | 930.7288  | 1021.6081 | 1027.0167 | 1080.7253 |
| 1087.4114  | 1101.0346 | 1137.5484 | 1147.2209 | 1175.9412 | 1201.5503 |
| 1215.5478  | 1217.2097 | 1240.7944 | 1282.5785 | 1351.5250 | 1368.8185 |
| 1383.3129  | 1408.1541 | 1424.2517 | 1440.0102 | 1442.7482 | 1444.1295 |
| 1455.5103  | 1461.6784 | 1554.2806 | 1820.9780 | 2934.3118 | 2938.1138 |
| 2959.0935  | 2962.9281 | 2992.7443 | 3009.6361 | 3011.7365 | 3024.8343 |
| 3038.0049  | 3045.0769 | 3081.8733 |           |           |           |

=====  
Structure 30  
=====

|            |           |           |           |           |           |
|------------|-----------|-----------|-----------|-----------|-----------|
| 1276.2340i | 51.4348   | 87.8860   | 121.6525  | 122.9660  | 168.0228  |
| 197.9409   | 214.8997  | 252.5006  | 297.1459  | 329.3784  | 365.5996  |
| 443.1641   | 477.8095  | 563.2004  | 709.5327  | 739.3098  | 810.4592  |
| 820.1433   | 889.3143  | 929.5839  | 969.7545  | 1034.9544 | 1056.9989 |
| 1100.3676  | 1108.5028 | 1137.1884 | 1139.6668 | 1167.7863 | 1186.1419 |
| 1196.9121  | 1217.1037 | 1266.4470 | 1308.6271 | 1321.8373 | 1357.7687 |
| 1374.3424  | 1430.3831 | 1435.2905 | 1444.5887 | 1445.4069 | 1452.7240 |
| 1460.6700  | 1463.4696 | 1552.3860 | 1810.9223 | 2944.5453 | 2958.3777 |
| 2964.0770  | 2997.9405 | 3006.9624 | 3015.9093 | 3030.7059 | 3041.5376 |
| 3043.9440  | 3057.5770 | 3083.5549 |           |           |           |

=====  
Structure 31  
=====

|            |          |          |          |          |          |
|------------|----------|----------|----------|----------|----------|
| 1293.9817i | 41.4259  | 54.3044  | 126.2387 | 150.8305 | 206.1335 |
| 214.3065   | 217.4761 | 268.9097 | 326.1178 | 357.7189 | 374.3237 |

|           |           |           |           |           |           |
|-----------|-----------|-----------|-----------|-----------|-----------|
| 431.0709  | 533.9684  | 548.8601  | 581.0990  | 750.5463  | 804.9427  |
| 823.0799  | 894.6956  | 944.0148  | 1001.1634 | 1034.2447 | 1072.3703 |
| 1088.1924 | 1107.6937 | 1137.5569 | 1148.7578 | 1184.9484 | 1190.7507 |
| 1218.3057 | 1234.1677 | 1251.7880 | 1295.4757 | 1345.7525 | 1367.0542 |
| 1371.7023 | 1406.9625 | 1428.8196 | 1437.5754 | 1444.1475 | 1446.3618 |
| 1455.6214 | 1461.4191 | 1502.3209 | 1813.7926 | 2938.0179 | 2958.5309 |
| 2961.0694 | 2967.8789 | 3005.3403 | 3013.8280 | 3015.5482 | 3027.4285 |
| 3038.8113 | 3053.0608 | 3082.9293 |           |           |           |

=====  
Structure 32  
=====

|            |           |           |           |           |           |
|------------|-----------|-----------|-----------|-----------|-----------|
| 1268.1107i | 50.6983   | 65.5699   | 118.0515  | 133.2417  | 172.8122  |
| 204.7462   | 217.8067  | 226.2569  | 300.2554  | 328.2148  | 338.9968  |
| 464.5266   | 473.1383  | 586.7801  | 698.0802  | 740.6572  | 809.1089  |
| 839.1826   | 877.9572  | 931.1835  | 961.1690  | 1043.6446 | 1076.1448 |
| 1103.6905  | 1104.4939 | 1126.6844 | 1138.3883 | 1164.7692 | 1190.5122 |
| 1204.6396  | 1232.8108 | 1257.1216 | 1302.4371 | 1330.6208 | 1350.1420 |
| 1374.7364  | 1429.6080 | 1440.1417 | 1441.9663 | 1447.2604 | 1448.4651 |
| 1461.8859  | 1464.9385 | 1528.5789 | 1816.8652 | 2941.0187 | 2944.9775 |
| 2961.9522  | 2988.4914 | 2994.8981 | 3013.9729 | 3025.8409 | 3041.2218 |
| 3048.0080  | 3060.8958 | 3082.7214 |           |           |           |

=====  
Structure 33  
=====

|            |           |           |           |           |           |
|------------|-----------|-----------|-----------|-----------|-----------|
| 1287.6383i | 53.0568   | 68.5928   | 99.1603   | 126.6677  | 183.7701  |
| 191.5066   | 201.9191  | 242.4257  | 306.9684  | 321.0776  | 331.4000  |
| 422.8733   | 471.7758  | 561.5854  | 711.1996  | 745.5643  | 808.9505  |
| 827.7107   | 886.1216  | 933.6242  | 993.5909  | 1042.9460 | 1071.3914 |
| 1092.9639  | 1109.5048 | 1133.7902 | 1140.4177 | 1163.8884 | 1187.3334 |
| 1195.7374  | 1218.5107 | 1258.8822 | 1291.8417 | 1325.2197 | 1361.6015 |
| 1382.1066  | 1427.6287 | 1439.6249 | 1443.2321 | 1443.4800 | 1444.5941 |
| 1459.8132  | 1462.0883 | 1532.8053 | 1813.4207 | 2922.7650 | 2939.6929 |
| 2961.9984  | 2979.3263 | 3003.5653 | 3007.5251 | 3037.4677 | 3041.0961 |
| 3048.8756  | 3057.5195 | 3081.8275 |           |           |           |

=====  
Structure 34  
=====

|            |           |           |           |           |           |
|------------|-----------|-----------|-----------|-----------|-----------|
| 1314.4098i | 45.8944   | 62.5459   | 105.5620  | 118.1309  | 151.1208  |
| 190.9078   | 206.2805  | 239.6273  | 316.0413  | 326.1916  | 331.7499  |
| 381.6253   | 469.2035  | 583.0649  | 704.8627  | 734.3945  | 805.7337  |
| 828.8044   | 897.9831  | 924.3728  | 1004.4282 | 1041.3189 | 1074.5643 |
| 1090.4708  | 1114.4559 | 1137.6860 | 1142.7984 | 1164.8939 | 1194.4107 |

|           |           |           |           |           |           |
|-----------|-----------|-----------|-----------|-----------|-----------|
| 1208.2499 | 1218.5703 | 1252.0446 | 1289.6769 | 1323.6398 | 1361.8373 |
| 1376.5329 | 1431.1431 | 1439.8431 | 1442.7114 | 1443.2704 | 1446.4343 |
| 1460.2703 | 1463.5207 | 1536.7445 | 1818.7398 | 2918.9072 | 2941.3697 |
| 2960.0484 | 2990.1963 | 2997.2612 | 3007.2264 | 3014.8630 | 3038.1386 |
| 3045.2399 | 3056.5420 | 3081.1047 |           |           |           |

=====  
Structure 35  
=====

|            |           |           |           |           |           |
|------------|-----------|-----------|-----------|-----------|-----------|
| 1304.6466i | 46.7379   | 66.7565   | 85.3813   | 130.2276  | 188.8128  |
| 206.9216   | 231.4462  | 244.5087  | 300.9507  | 357.7235  | 373.7432  |
| 442.8714   | 528.5504  | 546.6028  | 575.7982  | 762.1165  | 799.6096  |
| 835.6507   | 895.5628  | 936.0678  | 978.0771  | 1022.8353 | 1079.5486 |
| 1082.8945  | 1102.4867 | 1137.5684 | 1146.6484 | 1159.7937 | 1186.7542 |
| 1204.1007  | 1222.2317 | 1241.4716 | 1316.9632 | 1332.7117 | 1370.4196 |
| 1373.8421  | 1406.3207 | 1423.8878 | 1438.1502 | 1443.6226 | 1445.9547 |
| 1455.7961  | 1461.7591 | 1547.1641 | 1820.5023 | 2937.1846 | 2940.0497 |
| 2959.3978  | 2965.3640 | 3005.3271 | 3012.9152 | 3032.5848 | 3037.9226 |
| 3039.9587  | 3048.1651 | 3082.0017 |           |           |           |

=====  
Structure 36  
=====

|            |           |           |           |           |           |
|------------|-----------|-----------|-----------|-----------|-----------|
| 1307.2667i | 45.7880   | 55.1739   | 102.8854  | 127.6819  | 156.5428  |
| 194.0147   | 204.5735  | 222.9058  | 295.4201  | 325.0186  | 370.6287  |
| 408.6766   | 470.8038  | 582.3341  | 698.9018  | 740.5046  | 812.4142  |
| 833.1320   | 879.5604  | 925.4052  | 975.9120  | 1037.3909 | 1061.6694 |
| 1091.9034  | 1116.8008 | 1138.4587 | 1153.2574 | 1174.2384 | 1186.2365 |
| 1205.4393  | 1230.9383 | 1256.0260 | 1306.2525 | 1322.2668 | 1348.6030 |
| 1376.3780  | 1432.4337 | 1440.5171 | 1442.9586 | 1445.2957 | 1448.5090 |
| 1460.1572  | 1463.6914 | 1534.8282 | 1816.2827 | 2943.8436 | 2959.6661 |
| 2962.1842  | 2996.6856 | 3000.6689 | 3011.9578 | 3017.9896 | 3039.9108 |
| 3043.6084  | 3059.4907 | 3082.2371 |           |           |           |

=====  
Structure 37  
=====

|            |           |           |           |           |           |
|------------|-----------|-----------|-----------|-----------|-----------|
| 1308.8301i | 40.5344   | 54.5238   | 102.4284  | 129.0319  | 158.7917  |
| 196.1921   | 204.7482  | 226.5408  | 296.7556  | 319.7290  | 362.8803  |
| 414.2539   | 470.4214  | 582.6909  | 698.5449  | 743.7217  | 808.2785  |
| 829.0577   | 881.1120  | 930.4119  | 975.2907  | 1038.7876 | 1060.1520 |
| 1092.0760  | 1116.2429 | 1138.3220 | 1153.3907 | 1175.2276 | 1183.8994 |
| 1202.3196  | 1227.8616 | 1263.0620 | 1295.6858 | 1327.4835 | 1347.7400 |
| 1375.1013  | 1432.4853 | 1440.2452 | 1442.6371 | 1446.4779 | 1447.9661 |
| 1460.4237  | 1463.5210 | 1538.6342 | 1816.6211 | 2940.1460 | 2955.6737 |



|           |           |           |           |           |           |
|-----------|-----------|-----------|-----------|-----------|-----------|
| 2961.3140 | 2999.5981 | 3005.1219 | 3011.3537 | 3021.7883 | 3039.6630 |
| 3040.9665 | 3057.4987 | 3082.1840 |           |           |           |

=====  
 Structure 38  
 =====

|            |           |           |           |           |           |
|------------|-----------|-----------|-----------|-----------|-----------|
| 1313.5335i | 37.5242   | 55.0972   | 104.3620  | 133.4941  | 166.9840  |
| 203.7430   | 209.8564  | 218.1147  | 296.5298  | 317.7198  | 335.8386  |
| 462.9264   | 470.1542  | 586.5320  | 694.6404  | 735.9207  | 805.8580  |
| 828.3149   | 883.4982  | 934.0172  | 957.8687  | 1043.5003 | 1080.7295 |
| 1099.3429  | 1104.5382 | 1133.3569 | 1139.4282 | 1164.6630 | 1188.2658 |
| 1202.9065  | 1230.3171 | 1262.9274 | 1303.8690 | 1326.9348 | 1350.9238 |
| 1373.6177  | 1427.7489 | 1440.8870 | 1442.9313 | 1445.7830 | 1448.6484 |
| 1460.9465  | 1464.3598 | 1546.1644 | 1818.5512 | 2917.9831 | 2936.2617 |
| 2959.7829  | 3000.4224 | 3007.6433 | 3011.3188 | 3026.4277 | 3037.9136 |
| 3046.3880  | 3059.4674 | 3081.0718 |           |           |           |

=====  
 Structure 39  
 =====

|            |           |           |           |           |           |
|------------|-----------|-----------|-----------|-----------|-----------|
| 1321.0890i | 55.6038   | 78.9653   | 108.9129  | 121.2646  | 180.8549  |
| 189.3074   | 201.6057  | 248.3386  | 313.9029  | 319.6920  | 345.2368  |
| 427.9863   | 469.3850  | 561.6262  | 704.1012  | 744.3141  | 805.4420  |
| 825.4558   | 898.3247  | 929.1248  | 997.8754  | 1040.3029 | 1058.9618 |
| 1084.9831  | 1118.5949 | 1137.4531 | 1149.9102 | 1168.5823 | 1188.9322 |
| 1193.9904  | 1210.0755 | 1259.8934 | 1294.9189 | 1327.1482 | 1362.6803 |
| 1380.2689  | 1427.0514 | 1438.8810 | 1443.2839 | 1443.8594 | 1445.2493 |
| 1457.6984  | 1461.5183 | 1526.6459 | 1814.1910 | 2934.0135 | 2940.3296 |
| 2963.4255  | 2972.0819 | 2997.9735 | 3007.4119 | 3032.6513 | 3044.3931 |
| 3045.5908  | 3053.6316 | 3082.8823 |           |           |           |

=====  
 Structure 40  
 =====

|            |           |           |           |           |           |
|------------|-----------|-----------|-----------|-----------|-----------|
| 1285.8282i | 41.2085   | 66.1003   | 115.4391  | 122.6894  | 179.2986  |
| 193.0594   | 194.5345  | 256.8530  | 305.0149  | 321.0235  | 362.7767  |
| 429.6553   | 471.6454  | 561.6817  | 703.7540  | 744.7430  | 803.1268  |
| 818.2795   | 899.7361  | 927.9641  | 978.2036  | 1031.0083 | 1053.6880 |
| 1096.0449  | 1117.7059 | 1138.3865 | 1152.1292 | 1176.5384 | 1196.7001 |
| 1202.6692  | 1217.5036 | 1267.4742 | 1295.8456 | 1332.7501 | 1360.1185 |
| 1377.2012  | 1430.7061 | 1433.9748 | 1444.1456 | 1445.1310 | 1449.8123 |
| 1459.5016  | 1461.8367 | 1504.9746 | 1811.6806 | 2950.7993 | 2955.3727 |
| 2965.3583  | 2992.3101 | 3001.3870 | 3018.4381 | 3027.8233 | 3040.2417 |
| 3045.9902  | 3054.5527 | 3083.9554 |           |           |           |

=====  
 Structure 41  
 =====

|            |           |           |           |           |           |
|------------|-----------|-----------|-----------|-----------|-----------|
| 1286.5412i | 45.5205   | 91.4524   | 100.5382  | 150.0868  | 189.5531  |
| 197.8731   | 212.5787  | 226.3411  | 293.8269  | 322.1495  | 335.0516  |
| 456.5487   | 484.5609  | 562.3801  | 698.0965  | 756.4129  | 806.4077  |
| 815.2126   | 896.0994  | 931.8819  | 958.3122  | 1039.4603 | 1074.5292 |
| 1088.6801  | 1114.6169 | 1135.7354 | 1143.4936 | 1165.6046 | 1182.7451 |
| 1208.3313  | 1213.5597 | 1265.3344 | 1320.8993 | 1329.5519 | 1334.0513 |
| 1381.3535  | 1430.5337 | 1436.5793 | 1441.2562 | 1444.6033 | 1450.2528 |
| 1460.5632  | 1462.0582 | 1534.0142 | 1817.8982 | 2927.1817 | 2941.6747 |
| 2963.3874  | 2991.3126 | 3003.5285 | 3017.4308 | 3020.1478 | 3042.6089 |
| 3055.0410  | 3055.3725 | 3082.4164 |           |           |           |

**S.3.6** (TS<sub>δ</sub>)<sup>‡</sup>

=====  
 Structure 1  
 =====

|            |           |           |           |           |           |
|------------|-----------|-----------|-----------|-----------|-----------|
| 1277.4015i | 35.9350   | 60.6265   | 95.9263   | 136.3587  | 159.5515  |
| 174.8011   | 209.5077  | 236.2388  | 269.7712  | 331.7841  | 364.7038  |
| 507.2124   | 560.2996  | 572.7509  | 642.5433  | 731.8940  | 827.8466  |
| 848.1089   | 904.9976  | 922.0008  | 1001.4197 | 1030.2790 | 1046.0796 |
| 1084.5629  | 1099.7104 | 1148.3311 | 1157.7303 | 1167.7863 | 1175.6796 |
| 1189.4712  | 1208.1048 | 1243.7820 | 1282.2635 | 1289.3549 | 1369.0337 |
| 1380.8518  | 1414.0066 | 1416.7818 | 1431.4703 | 1440.1949 | 1441.5685 |
| 1444.0957  | 1457.7047 | 1674.1527 | 1798.8226 | 2942.5555 | 2974.2052 |
| 2979.7253  | 2981.8454 | 2987.8289 | 3017.7702 | 3020.2402 | 3030.1227 |
| 3071.1959  | 3103.9219 | 3104.2934 |           |           |           |

=====  
 Structure 2  
 =====

|            |           |           |           |           |           |
|------------|-----------|-----------|-----------|-----------|-----------|
| 1273.9513i | 35.0765   | 74.0970   | 87.5065   | 130.7109  | 141.6681  |
| 168.2041   | 200.7630  | 217.9829  | 288.8506  | 334.9681  | 355.9880  |
| 507.3219   | 552.2573  | 572.5550  | 643.1476  | 729.4501  | 831.9487  |
| 845.5826   | 905.3017  | 926.0439  | 1000.2077 | 1037.1985 | 1049.4804 |
| 1058.9782  | 1109.0885 | 1148.4569 | 1156.4491 | 1158.3614 | 1175.5655 |
| 1188.0096  | 1225.8792 | 1253.7452 | 1272.9967 | 1293.2826 | 1354.0206 |
| 1377.0558  | 1413.4907 | 1422.3633 | 1435.0513 | 1440.7893 | 1444.2901 |
| 1450.5438  | 1457.6999 | 1698.1510 | 1799.8668 | 2956.9958 | 2972.5485 |
| 2979.7628  | 2988.1504 | 3009.8176 | 3013.8557 | 3022.6706 | 3033.6127 |
| 3071.6926  | 3099.7681 | 3104.6421 |           |           |           |

Structure 3

```

=====
1281.8069i    45.9665    54.8653    120.0030    138.6978    166.3377
 182.2186    247.8041    265.3312    318.7944    331.2294    392.2030
 472.5942    568.8162    578.7098    651.9141    756.2012    820.0669
 848.3301    907.9030    939.0689    961.3822    1027.9326    1038.5491
1069.2207    1114.0651    1148.2500    1159.5252    1174.7443    1176.9167
1180.2361    1202.3489    1245.8120    1269.2661    1332.3987    1359.4096
1382.1592    1414.2205    1419.0204    1432.3979    1440.8945    1441.7560
1444.0726    1457.2204    1654.0805    1796.6537    2942.8174    2968.6136
2983.1686    2987.3161    3004.7617    3012.2998    3023.3718    3037.0331
3070.6365    3096.3118    3103.5451

```

Structure 4

```

=====
1265.8545i    29.7117    60.0338    96.2831    118.7970    132.9824
 140.7066    178.2947    214.8975    285.0425    311.4010    357.2808
 480.8241    551.3683    570.7602    690.3347    709.3747    783.1004
 896.7841    909.9975    918.1909    1016.3052    1032.7855    1054.6903
1081.5656    1095.0386    1148.4004    1154.0765    1156.0482    1174.4153
1200.2812    1202.1194    1260.4452    1273.0771    1286.4899    1333.7996
1386.2378    1415.9858    1424.0218    1439.6805    1443.4219    1443.9296
1455.3033    1458.0883    1704.7736    1802.1709    2952.5475    2972.5377
2983.3094    2987.5960    2992.9782    3010.9833    3015.9663    3034.7400
3070.8865    3101.7624    3103.8156

```

Structure 5

```

=====
1298.1839i    33.9904    61.2593    92.2786    136.8865    153.0895
 170.7414    205.6221    239.6387    279.0881    317.7449    363.7680
 507.1947    562.8865    572.2392    642.0331    736.1212    829.3745
 840.7156    904.7315    915.9528    1002.1730    1032.5429    1055.0620
1069.6688    1109.1619    1147.2484    1148.9930    1168.7946    1172.7393
1177.2179    1226.4202    1240.2779    1271.3776    1294.8055    1370.0782
1380.1727    1413.8193    1417.0745    1432.7789    1440.2741    1442.1010
1444.1382    1457.8087    1674.9081    1801.4360    2913.9146    2968.8403
2978.5565    2987.7794    3002.6327    3014.2049    3019.1885    3030.5189
3071.1378    3100.7318    3104.0317

```

Structure 6

|            |           |           |           |           |           |
|------------|-----------|-----------|-----------|-----------|-----------|
| 1294.2221i | 26.2679   | 62.3323   | 98.6435   | 104.6520  | 135.2155  |
| 153.2390   | 178.9537  | 239.3589  | 284.5190  | 309.1323  | 353.2279  |
| 475.6476   | 560.9528  | 571.4664  | 690.0534  | 709.3823  | 797.5024  |
| 880.7447   | 909.6355  | 911.9510  | 1017.5463 | 1040.7247 | 1063.2492 |
| 1074.1417  | 1108.1169 | 1142.8139 | 1148.6052 | 1167.3265 | 1174.6079 |
| 1178.5405  | 1208.2431 | 1250.1593 | 1272.6242 | 1284.7175 | 1349.7539 |
| 1392.4402  | 1416.6032 | 1417.8287 | 1433.8866 | 1439.8299 | 1443.8534 |
| 1453.3098  | 1458.1856 | 1671.7242 | 1802.8615 | 2920.5426 | 2970.3725 |
| 2972.8266  | 2982.0691 | 2987.4460 | 3009.5631 | 3017.8881 | 3032.6679 |
| 3070.6895  | 3103.5237 | 3104.0993 |           |           |           |

=====  
Structure 7  
=====

|            |           |           |           |           |           |
|------------|-----------|-----------|-----------|-----------|-----------|
| 1257.5833i | 52.7741   | 95.3557   | 120.0062  | 143.7200  | 171.4748  |
| 208.8391   | 223.0272  | 291.2707  | 302.9217  | 338.0577  | 390.6424  |
| 465.5897   | 563.7437  | 595.1259  | 654.5393  | 786.0476  | 804.8597  |
| 850.3895   | 914.4849  | 924.0401  | 966.8790  | 1029.0620 | 1046.6273 |
| 1077.9197  | 1106.6832 | 1147.8306 | 1159.5075 | 1164.1290 | 1177.2182 |
| 1194.1038  | 1223.9199 | 1237.8628 | 1260.3663 | 1336.9057 | 1354.8371 |
| 1382.5261  | 1408.2801 | 1415.3341 | 1429.0351 | 1439.8479 | 1441.5027 |
| 1444.0782  | 1456.3637 | 1659.9455 | 1797.4804 | 2931.6852 | 2968.0020 |
| 2974.3321  | 2983.0927 | 2986.6664 | 3021.8675 | 3022.6503 | 3029.5784 |
| 3070.2640  | 3103.3011 | 3113.8571 |           |           |           |

=====  
Structure 8  
=====

|            |           |           |           |           |           |
|------------|-----------|-----------|-----------|-----------|-----------|
| 1284.5466i | 26.0456   | 61.0103   | 101.4668  | 128.9527  | 136.5725  |
| 173.7360   | 203.9880  | 259.1995  | 304.7797  | 321.2426  | 407.0545  |
| 429.0723   | 572.2619  | 573.4486  | 686.9366  | 749.6293  | 796.7482  |
| 874.9972   | 909.2755  | 926.9567  | 959.6863  | 1029.4335 | 1061.0684 |
| 1090.0548  | 1093.2042 | 1148.4233 | 1164.2147 | 1166.2277 | 1174.6421 |
| 1189.8595  | 1210.6420 | 1232.2508 | 1278.2063 | 1316.7158 | 1343.0115 |
| 1390.7295  | 1413.7458 | 1416.7606 | 1430.0784 | 1439.7047 | 1443.8369 |
| 1449.8607  | 1458.0775 | 1668.9467 | 1799.7604 | 2937.9768 | 2969.1439 |
| 2977.1918  | 2985.5761 | 2987.1468 | 3012.2138 | 3016.4351 | 3035.7010 |
| 3069.9551  | 3098.1624 | 3103.1584 |           |           |           |

=====  
Structure 9  
=====

|            |          |          |          |          |          |
|------------|----------|----------|----------|----------|----------|
| 1284.4921i | 31.3954  | 45.0439  | 90.7715  | 135.8519 | 155.7609 |
| 173.7420   | 230.7989 | 254.0215 | 297.2580 | 344.8246 | 399.3330 |
| 474.1763   | 550.8155 | 572.5168 | 647.8712 | 746.5200 | 817.0547 |

|           |           |           |           |           |           |
|-----------|-----------|-----------|-----------|-----------|-----------|
| 849.5016  | 902.6173  | 937.9456  | 965.5803  | 1028.3751 | 1038.4102 |
| 1080.3055 | 1103.7715 | 1148.2233 | 1152.4106 | 1165.6741 | 1173.0933 |
| 1177.1072 | 1193.1569 | 1242.2645 | 1278.0308 | 1333.4855 | 1352.4072 |
| 1380.5047 | 1411.2591 | 1429.3781 | 1433.6500 | 1440.6483 | 1441.0133 |
| 1444.1950 | 1457.6899 | 1665.4133 | 1798.2504 | 2948.7661 | 2975.4569 |
| 2983.6490 | 2987.8868 | 3000.6558 | 3020.5306 | 3027.1009 | 3038.6400 |
| 3071.2523 | 3102.4929 | 3104.3227 |           |           |           |

=====  
Structure 10  
=====

|            |           |           |           |           |           |
|------------|-----------|-----------|-----------|-----------|-----------|
| 1291.1732i | 33.0436   | 54.3240   | 90.3930   | 130.1553  | 146.2078  |
| 176.5306   | 202.4061  | 256.7326  | 279.7205  | 340.8818  | 409.2477  |
| 474.4304   | 555.7354  | 575.2930  | 647.7384  | 743.7387  | 826.8214  |
| 845.1115   | 906.0319  | 933.9964  | 957.4260  | 1029.3961 | 1057.1913 |
| 1063.1267  | 1105.4567 | 1147.9132 | 1149.7979 | 1163.5071 | 1170.2960 |
| 1176.7355  | 1224.1972 | 1247.0310 | 1274.3099 | 1315.7717 | 1346.4378 |
| 1378.8375  | 1416.5757 | 1425.1634 | 1433.8556 | 1440.9251 | 1444.0161 |
| 1451.6833  | 1457.6595 | 1677.1032 | 1799.2996 | 2970.7377 | 2973.6927 |
| 2982.3764  | 2988.0147 | 3010.7773 | 3019.5804 | 3026.5861 | 3035.4789 |
| 3071.5176  | 3096.2372 | 3104.4932 |           |           |           |

=====  
Structure 11  
=====

|            |           |           |           |           |           |
|------------|-----------|-----------|-----------|-----------|-----------|
| 1282.5352i | 26.7013   | 56.7818   | 97.3110   | 104.3066  | 135.1107  |
| 165.5317   | 172.2590  | 244.9712  | 273.5654  | 303.7982  | 424.2973  |
| 447.4406   | 554.9763  | 573.0169  | 687.9501  | 739.6080  | 780.1301  |
| 887.8352   | 907.5471  | 922.0773  | 963.1567  | 1035.4365 | 1064.9035 |
| 1075.3029  | 1105.8816 | 1147.9841 | 1149.1441 | 1159.2029 | 1175.1467 |
| 1183.3548  | 1211.4667 | 1260.0216 | 1270.7683 | 1317.7547 | 1319.1219 |
| 1386.4976  | 1416.9164 | 1425.8691 | 1439.2502 | 1443.3953 | 1443.8609 |
| 1450.2721  | 1458.0754 | 1683.6215 | 1801.8153 | 2960.2298 | 2971.7881 |
| 2980.9236  | 2987.5264 | 3006.9785 | 3012.1098 | 3014.4186 | 3033.7688 |
| 3070.7875  | 3099.6006 | 3103.7525 |           |           |           |

=====  
Structure 12  
=====

|            |           |           |           |           |           |
|------------|-----------|-----------|-----------|-----------|-----------|
| 1289.6588i | 35.4278   | 63.3909   | 74.2543   | 137.8464  | 154.4783  |
| 181.0984   | 206.8719  | 236.6108  | 282.3552  | 330.0321  | 385.0751  |
| 499.9994   | 557.6133  | 593.9691  | 648.6091  | 737.6439  | 828.4618  |
| 846.1841   | 880.9191  | 923.4683  | 987.4389  | 1034.8545 | 1055.8079 |
| 1081.7557  | 1104.4980 | 1148.6655 | 1156.0308 | 1167.8549 | 1178.0816 |
| 1188.3976  | 1205.4854 | 1268.7068 | 1276.9672 | 1305.1131 | 1340.6303 |

|           |           |           |           |           |           |
|-----------|-----------|-----------|-----------|-----------|-----------|
| 1373.6111 | 1416.4982 | 1421.8667 | 1430.3426 | 1437.0826 | 1443.3525 |
| 1446.8951 | 1457.6907 | 1670.3801 | 1802.2045 | 2925.5620 | 2975.6763 |
| 2980.5700 | 2983.4845 | 2987.5286 | 3017.5237 | 3025.9612 | 3048.8697 |
| 3070.9458 | 3103.2567 | 3104.1067 |           |           |           |

=====  
Structure 13  
=====

|            |           |           |           |           |           |
|------------|-----------|-----------|-----------|-----------|-----------|
| 1294.9720i | 25.4745   | 55.1616   | 69.9620   | 120.6151  | 135.6243  |
| 170.3042   | 194.9101  | 237.9148  | 302.7506  | 312.3705  | 416.0923  |
| 438.6254   | 553.4712  | 572.1460  | 686.4767  | 738.3823  | 793.3608  |
| 871.2156   | 905.5603  | 924.3866  | 970.2046  | 1038.9792 | 1062.5253 |
| 1080.2950  | 1106.4989 | 1141.3090 | 1148.6876 | 1168.3731 | 1170.2233 |
| 1175.3591  | 1211.5112 | 1239.7509 | 1279.3004 | 1317.6775 | 1339.5843 |
| 1388.7945  | 1416.6658 | 1424.2252 | 1434.9705 | 1439.6395 | 1443.8290 |
| 1449.7574  | 1458.0942 | 1669.4302 | 1802.8166 | 2918.4295 | 2969.4523 |
| 2983.4425  | 2987.4484 | 2998.6588 | 3016.6071 | 3023.9796 | 3038.9147 |
| 3070.7441  | 3103.5233 | 3104.2081 |           |           |           |

=====  
Structure 14  
=====

|            |           |           |           |           |           |
|------------|-----------|-----------|-----------|-----------|-----------|
| 1290.7445i | 33.1528   | 58.8769   | 74.7731   | 137.0041  | 152.0634  |
| 177.7787   | 205.6206  | 243.3307  | 289.7341  | 316.1057  | 384.5785  |
| 499.0294   | 557.6262  | 594.8452  | 651.2493  | 741.1014  | 829.8072  |
| 842.7889   | 879.6082  | 919.7339  | 990.0252  | 1040.3712 | 1053.0880 |
| 1086.3275  | 1102.5495 | 1146.8647 | 1148.9585 | 1168.3935 | 1171.6785 |
| 1178.5223  | 1222.6382 | 1262.3105 | 1276.8278 | 1309.4008 | 1340.5006 |
| 1373.7742  | 1416.9725 | 1422.3886 | 1430.5800 | 1437.1076 | 1443.6193 |
| 1446.5905  | 1457.5441 | 1675.0534 | 1801.5625 | 2924.9352 | 2970.0429 |
| 2981.4900  | 2983.7388 | 2987.4944 | 3016.4355 | 3026.4128 | 3048.9930 |
| 3070.6739  | 3102.9328 | 3104.0892 |           |           |           |

=====  
Structure 15  
=====

|            |           |           |           |           |           |
|------------|-----------|-----------|-----------|-----------|-----------|
| 1270.0751i | 30.9238   | 80.2792   | 106.2868  | 132.8845  | 138.9131  |
| 167.5861   | 215.4999  | 253.0048  | 295.0606  | 324.0750  | 395.6401  |
| 478.7910   | 563.9064  | 574.2599  | 668.0993  | 759.2847  | 812.2406  |
| 866.1404   | 914.1987  | 920.3099  | 965.4794  | 1023.2838 | 1040.8122 |
| 1076.8821  | 1105.7631 | 1148.3828 | 1157.0145 | 1157.8133 | 1174.7978 |
| 1195.1428  | 1204.9178 | 1248.5379 | 1268.8507 | 1321.7760 | 1340.5875 |
| 1376.1134  | 1417.7461 | 1424.9383 | 1437.4099 | 1440.4764 | 1443.8310 |
| 1447.0361  | 1457.4176 | 1690.9002 | 1797.4194 | 2957.4081 | 2973.0837 |
| 2980.5468  | 2987.9726 | 3003.3114 | 3014.7194 | 3026.1252 | 3035.2129 |

3071.5760 3103.3581 3104.6614

=====  
Structure 16  
=====

|            |           |           |           |           |           |
|------------|-----------|-----------|-----------|-----------|-----------|
| 1279.0032i | 35.6188   | 66.1501   | 83.6840   | 127.5827  | 137.5762  |
| 173.4234   | 199.3180  | 221.3888  | 296.0101  | 335.3624  | 374.7872  |
| 499.5347   | 551.1521  | 592.0041  | 647.4918  | 732.9148  | 835.9900  |
| 846.8467   | 873.1218  | 926.9459  | 994.0200  | 1036.8624 | 1048.8241 |
| 1070.5825  | 1109.8130 | 1148.7218 | 1156.1888 | 1158.7066 | 1177.9241 |
| 1186.5306  | 1231.0949 | 1263.1477 | 1286.8452 | 1298.6582 | 1340.0530 |
| 1356.8090  | 1419.6459 | 1424.2132 | 1433.7930 | 1442.5067 | 1443.4255 |
| 1448.6231  | 1457.6112 | 1697.2675 | 1802.7443 | 2957.2135 | 2974.1848 |
| 2982.6500  | 2987.8724 | 3000.0038 | 3014.2266 | 3028.0084 | 3049.0995 |
| 3071.5815  | 3099.8817 | 3103.6363 |           |           |           |

=====  
Structure 17  
=====

|            |           |           |           |           |           |
|------------|-----------|-----------|-----------|-----------|-----------|
| 1295.1251i | 24.1805   | 64.1036   | 90.1466   | 106.3293  | 138.6225  |
| 154.3037   | 189.6146  | 247.7211  | 281.8392  | 308.0263  | 376.0043  |
| 440.5703   | 556.6621  | 633.4409  | 702.4677  | 721.1774  | 794.6288  |
| 868.2238   | 890.2589  | 915.0381  | 1024.1000 | 1043.1646 | 1058.6369 |
| 1075.2599  | 1108.8861 | 1143.2837 | 1148.6728 | 1168.2426 | 1177.1177 |
| 1179.5659  | 1232.3806 | 1245.1417 | 1285.5105 | 1304.3986 | 1329.8780 |
| 1374.1058  | 1417.3642 | 1426.8003 | 1435.0379 | 1437.7764 | 1443.4736 |
| 1456.2555  | 1457.6258 | 1671.1104 | 1803.3672 | 2922.0840 | 2968.0629 |
| 2976.9085  | 2979.4967 | 2987.7286 | 3017.5527 | 3022.9393 | 3053.1895 |
| 3071.2970  | 3103.3185 | 3104.2575 |           |           |           |

=====  
Structure 18  
=====

|            |           |           |           |           |           |
|------------|-----------|-----------|-----------|-----------|-----------|
| 1293.6238i | 21.5811   | 64.5016   | 88.2352   | 106.2289  | 138.9539  |
| 157.4849   | 184.3333  | 250.5615  | 282.1542  | 305.6786  | 379.4171  |
| 434.5434   | 556.8492  | 636.7911  | 705.6712  | 724.9139  | 791.2860  |
| 870.3442   | 890.3043  | 917.0368  | 1016.7440 | 1042.9303 | 1059.1824 |
| 1085.2806  | 1101.2826 | 1144.0318 | 1148.6846 | 1167.7441 | 1177.8369 |
| 1178.4772  | 1225.7733 | 1255.2984 | 1281.3237 | 1304.4645 | 1330.4816 |
| 1373.7603  | 1417.5184 | 1427.5003 | 1434.9664 | 1438.2199 | 1443.6293 |
| 1456.3651  | 1457.6408 | 1673.2414 | 1802.6014 | 2925.0149 | 2963.3820 |
| 2976.9873  | 2980.6496 | 2987.5909 | 3017.6657 | 3024.5628 | 3053.7455 |
| 3070.9043  | 3103.7347 | 3104.0182 |           |           |           |

Structure 19

```

=====
1274.0875i    23.1651    62.6682    87.6598    115.8029    138.0262
 139.9738    176.2739    228.3455    287.4782    316.9088    372.7215
  437.3168    552.3608    636.2047    708.2113    725.1844    780.6483
  867.3312    912.2515    918.7818    1016.4513    1040.8993    1054.4119
1061.5989    1106.7043    1148.6373    1154.7535    1156.7371    1177.9857
1200.6171    1218.2280    1264.6992    1288.5267    1297.0382    1323.7388
1359.2911    1424.1145    1427.9562    1438.0056    1443.5497    1444.7833
1457.6919    1458.1134    1698.4139    1803.1965    2955.4447    2968.7767
2981.0030    2987.6969    2997.7174    3015.5591    3025.7351    3056.4231
3071.1698    3101.4373    3103.5326

```

Structure 20

```

=====
1273.9198i    22.9549    58.4146    72.3515    123.9333    140.1580
 180.9929    215.6603    274.3933    298.4025    351.1701    415.5333
  472.3892    554.9787    604.4343    691.6500    750.5717    820.5992
  845.2123    891.4591    937.6983    959.3349    1017.7451    1061.6529
1086.5211    1095.7979    1146.8572    1148.4318    1160.5569    1168.1804
1178.0941    1193.0004    1262.3305    1286.1497    1320.0395    1344.1831
1355.2252    1419.8872    1433.5452    1437.3361    1440.7073    1443.7976
1450.3357    1457.7036    1682.5995    1799.6369    2918.1845    2979.6990
2987.1927    2997.1619    3002.4016    3025.7529    3030.9311    3064.9955
3070.3092    3103.6131    3109.9346

```

Structure 21

```

=====
1283.3791i    20.4465    49.3393    105.7217    121.6354    139.2961
 168.8674    196.8703    257.6677    293.0579    340.6762    415.2897
  469.3052    564.2668    604.8472    689.0197    746.6774    834.9595
  840.4823    887.8052    936.8085    953.9527    1030.0514    1053.2345
1080.7434    1099.7966    1144.1786    1148.3730    1159.7919    1164.1260
1178.7781    1222.8817    1262.0446    1285.8499    1311.8163    1338.4983
1351.4169    1423.2906    1430.2222    1434.5813    1443.4789    1445.5570
1450.1316    1457.6402    1689.3940    1800.0217    2959.9648    2973.3778
2987.4862    2996.3902    3005.6883    3013.5383    3025.2995    3063.6139
3070.8864    3102.8260    3103.9401

```

Structure 22



|            |           |           |           |           |           |
|------------|-----------|-----------|-----------|-----------|-----------|
| 1293.1809i | 23.3373   | 55.0247   | 107.6231  | 110.9472  | 141.2427  |
| 186.1022   | 217.9799  | 257.0159  | 294.2052  | 318.6267  | 399.2523  |
| 434.6864   | 571.7779  | 627.3458  | 721.3774  | 742.8340  | 791.4539  |
| 868.9381   | 886.4806  | 936.0926  | 955.8526  | 1038.8751 | 1056.1980 |
| 1081.4086  | 1102.9743 | 1148.6171 | 1163.4480 | 1166.0618 | 1178.1497 |
| 1191.9013  | 1212.8094 | 1261.9890 | 1277.5562 | 1317.3705 | 1340.6836 |
| 1365.7145  | 1414.7528 | 1426.4999 | 1431.2106 | 1437.8696 | 1443.5333 |
| 1453.4559  | 1457.8643 | 1667.8174 | 1803.1520 | 2938.3427 | 2969.6306 |
| 2979.2339  | 2987.2101 | 2990.3536 | 3012.9884 | 3019.6142 | 3056.9669 |
| 3070.5122  | 3099.3054 | 3102.5456 |           |           |           |

=====  
Structure 23  
=====

|            |           |           |           |           |           |
|------------|-----------|-----------|-----------|-----------|-----------|
| 1290.4561i | 21.7302   | 54.5574   | 97.7625   | 123.1126  | 140.2621  |
| 183.0789   | 227.1680  | 253.2538  | 294.1749  | 319.6075  | 409.5040  |
| 421.3178   | 571.7250  | 629.0108  | 713.7849  | 758.1366  | 799.3662  |
| 872.4536   | 885.1807  | 926.5656  | 958.7086  | 1038.9984 | 1051.3836 |
| 1081.0367  | 1105.5784 | 1148.7175 | 1161.6341 | 1164.8047 | 1178.0259 |
| 1190.2226  | 1212.6788 | 1254.3627 | 1286.1456 | 1317.9642 | 1339.7871 |
| 1365.9334  | 1415.0113 | 1427.2540 | 1430.9836 | 1438.5068 | 1443.4690 |
| 1454.2681  | 1457.9725 | 1669.4342 | 1803.1051 | 2938.1812 | 2961.4706 |
| 2979.1963  | 2985.5354 | 2987.1282 | 3014.2224 | 3024.5932 | 3069.2777 |
| 3070.2584  | 3100.4464 | 3102.6407 |           |           |           |

=====  
Structure 24  
=====

|            |           |           |           |           |           |
|------------|-----------|-----------|-----------|-----------|-----------|
| 1282.6722i | 51.6977   | 62.7420   | 97.0360   | 132.8846  | 141.8830  |
| 171.5824   | 210.7931  | 258.2361  | 301.6754  | 321.0682  | 407.0999  |
| 480.4484   | 573.2533  | 588.6055  | 666.3257  | 763.9065  | 811.1704  |
| 855.7796   | 892.3766  | 922.8217  | 974.5178  | 1007.8978 | 1055.1356 |
| 1082.3744  | 1107.7578 | 1147.7047 | 1159.9642 | 1162.0441 | 1178.2620 |
| 1199.2621  | 1206.4749 | 1265.8573 | 1285.6562 | 1320.7890 | 1342.7017 |
| 1352.1106  | 1420.4820 | 1427.5442 | 1434.3982 | 1442.8338 | 1443.4881 |
| 1446.4408  | 1456.8302 | 1675.1094 | 1798.3577 | 2958.8436 | 2973.1945 |
| 2981.4198  | 2985.8599 | 3003.8543 | 3016.9202 | 3026.0033 | 3048.0622 |
| 3069.0682  | 3102.8339 | 3104.8162 |           |           |           |

=====  
Structure 25  
=====

|            |          |          |          |          |          |
|------------|----------|----------|----------|----------|----------|
| 1284.7926i | 24.0246  | 52.2893  | 94.4018  | 108.5911 | 137.6277 |
| 146.0357   | 212.3897 | 246.3409 | 272.1542 | 294.9722 | 410.8471 |
| 456.9845   | 556.6625 | 623.9460 | 719.9565 | 732.5941 | 776.7429 |

|           |           |           |           |           |           |
|-----------|-----------|-----------|-----------|-----------|-----------|
| 866.2467  | 897.4873  | 929.4255  | 964.1287  | 1042.9253 | 1063.3499 |
| 1071.5708 | 1108.8977 | 1148.2420 | 1148.6344 | 1158.9821 | 1178.1566 |
| 1183.3683 | 1234.7072 | 1261.3390 | 1280.9287 | 1318.1858 | 1321.1257 |
| 1358.3481 | 1424.6374 | 1428.9490 | 1437.8229 | 1443.5505 | 1444.3703 |
| 1452.4376 | 1457.7696 | 1682.6800 | 1802.8874 | 2961.2179 | 2969.9727 |
| 2982.4285 | 2987.8036 | 3006.1642 | 3014.7993 | 3023.1728 | 3052.4543 |
| 3071.2705 | 3101.1083 | 3103.4728 |           |           |           |

=====  
Structure 26  
=====

|            |           |           |           |           |           |
|------------|-----------|-----------|-----------|-----------|-----------|
| 1267.3944i | 33.6840   | 62.0707   | 86.9350   | 132.3474  | 169.4630  |
| 191.7781   | 229.0545  | 253.3829  | 307.3262  | 326.1557  | 403.6170  |
| 478.2968   | 558.7967  | 589.9191  | 669.6151  | 768.0011  | 804.3369  |
| 849.0431   | 887.8714  | 920.0678  | 970.7616  | 1023.4760 | 1068.5638 |
| 1077.9131  | 1095.0333 | 1147.6774 | 1149.1654 | 1153.5633 | 1169.7970 |
| 1178.9988  | 1216.4430 | 1255.7830 | 1286.2683 | 1339.0727 | 1345.7870 |
| 1354.2467  | 1418.2063 | 1428.6586 | 1435.3045 | 1441.0541 | 1443.5484 |
| 1446.4618  | 1454.2223 | 1693.3945 | 1796.2555 | 2920.7393 | 2975.5265 |
| 2982.5283  | 2985.6482 | 2996.8597 | 3025.1955 | 3028.7531 | 3047.1896 |
| 3068.8388  | 3104.9051 | 3106.2931 |           |           |           |

=====  
Structure 27  
=====

|            |           |           |           |           |           |
|------------|-----------|-----------|-----------|-----------|-----------|
| 1281.7348i | 22.5514   | 50.8687   | 95.1551   | 101.1198  | 138.8103  |
| 148.2690   | 216.1315  | 241.7116  | 272.7375  | 296.5471  | 420.0373  |
| 444.2947   | 555.8738  | 624.6735  | 705.7564  | 750.8886  | 782.8510  |
| 868.7751   | 896.6326  | 923.4847  | 960.6169  | 1038.9887 | 1071.2418 |
| 1078.2536  | 1100.9027 | 1148.1980 | 1148.9248 | 1158.1880 | 1177.6486 |
| 1182.6275  | 1233.1080 | 1260.7147 | 1285.2697 | 1314.7774 | 1325.2848 |
| 1358.5302  | 1424.9481 | 1429.5295 | 1438.3036 | 1443.4181 | 1443.6351 |
| 1453.0732  | 1457.7396 | 1687.6264 | 1803.0648 | 2960.6610 | 2965.3307 |
| 2977.9163  | 2987.6800 | 3007.3638 | 3015.9564 | 3024.4173 | 3062.1182 |
| 3071.1759  | 3102.4518 | 3103.4698 |           |           |           |

=====  
Structure 28  
=====

|            |           |           |           |           |           |
|------------|-----------|-----------|-----------|-----------|-----------|
| 1313.6085i | 30.2133   | 59.5139   | 96.0729   | 139.3370  | 163.8383  |
| 181.1629   | 232.6623  | 269.8358  | 307.8485  | 340.4409  | 398.9452  |
| 493.3917   | 568.7852  | 581.8986  | 632.2543  | 761.2217  | 819.5734  |
| 848.7472   | 879.2994  | 931.9042  | 964.2258  | 1022.6380 | 1046.3455 |
| 1081.0120  | 1113.9182 | 1148.9560 | 1159.9189 | 1175.9571 | 1178.7873 |
| 1179.1737  | 1204.2162 | 1265.3554 | 1280.6839 | 1328.4444 | 1351.3945 |

|           |           |           |           |           |           |
|-----------|-----------|-----------|-----------|-----------|-----------|
| 1360.9197 | 1414.3654 | 1420.2121 | 1433.3698 | 1435.6186 | 1443.0113 |
| 1444.4781 | 1457.8174 | 1651.6484 | 1802.3628 | 2940.7845 | 2966.6400 |
| 2980.2759 | 2987.5359 | 2989.0050 | 3011.7161 | 3026.5721 | 3050.7332 |
| 3071.3550 | 3097.0638 | 3102.4690 |           |           |           |

=====  
Structure 29  
=====

|            |           |           |           |           |           |
|------------|-----------|-----------|-----------|-----------|-----------|
| 1296.1812i | 19.4844   | 46.8108   | 72.2685   | 112.2531  | 139.8283  |
| 176.2781   | 214.0467  | 237.2456  | 290.2282  | 310.7518  | 409.0791  |
| 439.8734   | 553.2475  | 624.7652  | 718.1120  | 733.4368  | 783.4330  |
| 868.8888   | 880.9829  | 932.3445  | 967.2801  | 1040.5754 | 1070.7103 |
| 1087.8474  | 1093.4889 | 1142.2590 | 1148.6580 | 1168.0064 | 1169.8655 |
| 1178.3384  | 1223.1037 | 1267.9073 | 1274.9080 | 1318.0258 | 1340.7193 |
| 1362.1023  | 1422.6045 | 1428.6379 | 1434.9480 | 1438.0290 | 1443.6602 |
| 1452.1728  | 1457.6085 | 1670.5845 | 1802.0155 | 2924.0911 | 2972.4026 |
| 2986.1129  | 2987.5474 | 2995.9982 | 3023.9164 | 3025.7424 | 3053.5065 |
| 3070.8898  | 3103.6331 | 3105.8065 |           |           |           |

=====  
Structure 30  
=====

|            |           |           |           |           |           |
|------------|-----------|-----------|-----------|-----------|-----------|
| 1297.1351i | 22.6316   | 48.1816   | 78.4077   | 110.7861  | 140.6285  |
| 176.3790   | 213.4957  | 236.4693  | 292.6869  | 314.0388  | 420.4706  |
| 425.6962   | 553.8965  | 621.0256  | 700.6225  | 745.6264  | 794.6402  |
| 868.7678   | 880.4823  | 924.3473  | 971.4323  | 1040.7752 | 1071.2720 |
| 1080.7626  | 1102.1756 | 1140.3289 | 1148.7141 | 1168.9316 | 1169.4083 |
| 1178.8648  | 1227.4305 | 1251.5864 | 1292.0171 | 1314.5301 | 1341.5947 |
| 1363.9514  | 1423.0821 | 1427.4226 | 1434.5359 | 1437.8987 | 1443.5441 |
| 1452.6325  | 1457.6733 | 1667.6735 | 1803.1039 | 2921.5391 | 2967.6813 |
| 2977.3937  | 2987.7052 | 2995.2014 | 3024.8121 | 3030.8103 | 3064.3112 |
| 3071.2906  | 3103.3103 | 3107.6405 |           |           |           |

=====  
Structure 31  
=====

|            |           |           |           |           |           |
|------------|-----------|-----------|-----------|-----------|-----------|
| 1299.8249i | 16.9693   | 66.4115   | 103.2227  | 137.6446  | 162.6248  |
| 187.0470   | 229.7070  | 249.9173  | 310.2139  | 324.6049  | 390.9620  |
| 476.5372   | 553.7971  | 570.7656  | 673.9567  | 763.3053  | 806.5251  |
| 856.4736   | 910.2782  | 918.0577  | 970.5359  | 1033.4501 | 1052.5431 |
| 1082.4621  | 1085.7538 | 1144.5531 | 1148.7171 | 1152.6672 | 1168.8540 |
| 1177.0606  | 1213.3979 | 1233.9687 | 1267.3123 | 1340.1458 | 1342.9111 |
| 1376.1148  | 1416.7940 | 1426.4806 | 1436.6615 | 1439.7475 | 1443.3277 |
| 1443.8598  | 1457.7009 | 1695.4503 | 1803.1271 | 2916.7249 | 2973.5359 |
| 2980.7206  | 2987.6963 | 2994.3796 | 3019.5623 | 3026.9414 | 3033.9597 |

3071.2967      3100.0837      3103.9145

=====  
Structure 32  
=====

|            |           |           |           |           |           |
|------------|-----------|-----------|-----------|-----------|-----------|
| 1280.8749i | 54.1154   | 56.9197   | 107.8850  | 143.0737  | 186.2681  |
| 196.1019   | 215.5043  | 295.5571  | 301.9566  | 327.3899  | 391.6196  |
| 494.1183   | 561.6727  | 588.1999  | 626.7062  | 784.0673  | 800.3738  |
| 854.2035   | 871.5303  | 918.4278  | 975.6164  | 1024.9216 | 1054.1020 |
| 1088.2342  | 1105.3959 | 1148.6934 | 1163.0764 | 1169.2444 | 1179.3875 |
| 1195.2495  | 1234.8811 | 1246.3584 | 1283.3660 | 1339.6274 | 1345.3151 |
| 1365.8376  | 1405.4984 | 1413.3907 | 1429.1388 | 1435.4214 | 1442.4994 |
| 1445.9083  | 1456.7821 | 1659.1697 | 1798.2459 | 2930.7682 | 2970.2695 |
| 2974.7044  | 2983.2938 | 2986.7216 | 3021.7276 | 3022.4946 | 3031.3603 |
| 3071.4264  | 3101.2374 | 3109.4169 |           |           |           |

=====  
Structure 33  
=====

|            |           |           |           |           |           |
|------------|-----------|-----------|-----------|-----------|-----------|
| 1260.2385i | 64.2033   | 68.6875   | 123.2873  | 154.6461  | 209.1511  |
| 211.8320   | 253.9134  | 263.1481  | 330.6113  | 339.0618  | 418.7767  |
| 524.0206   | 538.4821  | 574.0727  | 594.5955  | 738.7744  | 802.5910  |
| 823.7547   | 889.4749  | 937.9837  | 966.6609  | 1029.9151 | 1065.2632 |
| 1085.6838  | 1113.1780 | 1140.1399 | 1150.0283 | 1161.6474 | 1177.2117 |
| 1180.1994  | 1205.5055 | 1244.2753 | 1269.9877 | 1330.9162 | 1359.5805 |
| 1380.4571  | 1413.6392 | 1415.4586 | 1431.6483 | 1439.7240 | 1446.2802 |
| 1458.9175  | 1464.8148 | 1661.6931 | 1815.8784 | 2943.2433 | 2963.7212 |
| 2965.6446  | 2974.6307 | 3005.8674 | 3015.7600 | 3024.6659 | 3038.8861 |
| 3044.2739  | 3088.2528 | 3096.7282 |           |           |           |

=====  
Structure 34  
=====

|            |           |           |           |           |           |
|------------|-----------|-----------|-----------|-----------|-----------|
| 1275.6573i | 47.5262   | 60.1331   | 101.4501  | 124.8876  | 165.1730  |
| 195.3940   | 229.9027  | 245.4120  | 258.4997  | 326.7643  | 414.6739  |
| 529.4324   | 540.4340  | 563.1601  | 587.6807  | 712.7909  | 795.8541  |
| 833.5630   | 888.0603  | 923.6506  | 1010.2610 | 1040.6262 | 1076.8603 |
| 1085.3344  | 1103.4766 | 1139.5714 | 1145.6079 | 1161.4305 | 1168.7883 |
| 1191.1989  | 1212.3773 | 1240.6441 | 1282.4317 | 1291.2624 | 1369.1961 |
| 1378.0950  | 1407.6111 | 1416.9796 | 1431.1070 | 1440.1361 | 1447.9605 |
| 1458.3002  | 1463.5353 | 1674.2399 | 1820.4288 | 2942.1755 | 2962.7941 |
| 2968.5461  | 2977.0511 | 2983.1017 | 3008.0543 | 3018.8865 | 3031.5827 |
| 3045.5514  | 3089.6998 | 3105.1203 |           |           |           |

Structure 35

```

=====
1235.4298i    70.3040    121.5069    136.7658    153.2496    215.5197
 224.6222    236.9811    294.1476    304.6887    361.3348    424.1222
 523.8655    530.4729    582.3400    598.9355    763.0225    795.9600
 829.3955    893.9202    928.1629    972.0538    1038.3109    1075.5930
1087.4650    1106.2564    1140.1246    1151.7195    1156.8477    1165.3674
1188.5933    1224.4273    1242.9318    1256.4314    1335.6631    1352.5500
1380.4307    1407.9789    1415.1605    1428.7552    1441.5902    1445.5934
1458.8218    1464.8040    1668.1795    1815.8973    2933.0437    2962.7426
2965.1684    2967.8639    2986.5782    3018.3479    3025.3440    3037.6811
3043.9227    3088.5454    3117.7331

```

Structure 36

```

=====
1268.2998i    32.0816    77.1540    93.9437    117.3155    139.2187
 196.1081    217.7169    265.4159    305.4350    328.1348    420.5294
 503.7008    538.5348    572.9988    593.8380    746.0760    797.5449
 847.7489    887.7927    926.2493    964.6462    1048.6500    1083.6226
1092.7509    1096.3100    1138.4646    1146.3588    1164.9641    1166.3779
1191.2446    1213.1568    1231.8053    1284.2006    1312.2545    1342.4717
1388.6335    1409.1994    1416.1092    1429.3647    1446.2374    1448.8226
1457.9081    1462.4227    1672.3355    1821.6527    2938.7963    2963.3689
2969.2672    2972.2223    2990.3314    3007.1342    3012.7397    3038.8561
3046.3185    3089.9141    3099.1529

```

Structure 37

```

=====
1274.2277i    46.5283    76.6080    95.8807    121.3860    150.8987
 193.4750    208.1392    238.8257    275.0145    335.0786    406.6398
 531.0688    547.7289    552.6199    584.6431    713.5945    785.7910
 848.9401    881.4114    926.9935    1012.8653    1048.5130    1057.7227
1080.7764    1110.3440    1139.8244    1149.7560    1155.9814    1158.5575
1191.8865    1224.7585    1253.5836    1275.8505    1293.7749    1354.9341
1374.3311    1407.1477    1422.1192    1434.4533    1448.0651    1450.7584
1458.4039    1463.8417    1699.8285    1821.1322    2954.8102    2961.9630
2968.0883    2976.5076    3007.7242    3013.0465    3020.9093    3037.3620
3045.3948    3089.7133    3100.5938

```

Structure 38

|            |           |           |           |           |           |
|------------|-----------|-----------|-----------|-----------|-----------|
| 1265.2358i | 36.8203   | 71.6912   | 100.4624  | 101.5691  | 131.9964  |
| 146.4532   | 197.5021  | 222.4474  | 260.1955  | 341.0440  | 396.0481  |
| 531.5899   | 533.6178  | 551.5795  | 588.1564  | 710.4642  | 788.5602  |
| 842.0788   | 912.0094  | 915.7357  | 1029.6305 | 1047.0192 | 1071.1371 |
| 1088.5511  | 1096.0033 | 1138.6562 | 1146.4002 | 1153.3022 | 1156.3522 |
| 1203.2542  | 1203.5706 | 1256.4717 | 1277.2840 | 1287.1866 | 1331.3547 |
| 1383.0265  | 1410.0234 | 1424.2427 | 1441.8760 | 1447.0712 | 1453.9920 |
| 1458.1602  | 1461.7170 | 1706.0122 | 1823.6545 | 2950.2917 | 2958.4755 |
| 2967.7622  | 2988.8220 | 2991.1753 | 2999.7110 | 3017.4318 | 3038.8179 |
| 3044.5029  | 3089.8843 | 3103.4770 |           |           |           |

=====  
Structure 39  
=====

|            |           |           |           |           |           |
|------------|-----------|-----------|-----------|-----------|-----------|
| 1297.6227i | 35.0228   | 76.2788   | 93.9238   | 107.4237  | 124.8862  |
| 159.3082   | 199.1822  | 233.2389  | 292.8122  | 307.6220  | 403.6702  |
| 522.4327   | 534.0635  | 565.1257  | 587.8607  | 710.4336  | 803.8191  |
| 840.2196   | 894.1657  | 912.4682  | 1031.7530 | 1065.1240 | 1065.9966 |
| 1084.8957  | 1107.8029 | 1138.9272 | 1140.6346 | 1149.7763 | 1167.2352 |
| 1178.7343  | 1211.5303 | 1251.9093 | 1270.4263 | 1286.5177 | 1347.5714 |
| 1389.6955  | 1411.4281 | 1417.9061 | 1433.5518 | 1446.9920 | 1451.3851 |
| 1458.4209  | 1462.3700 | 1671.3745 | 1824.6739 | 2918.7733 | 2956.8974 |
| 2967.2523  | 2970.4729 | 2987.3450 | 2997.9841 | 3018.9328 | 3036.5365 |
| 3043.9124  | 3089.3324 | 3105.3336 |           |           |           |

=====  
Structure 40  
=====

|            |           |           |           |           |           |
|------------|-----------|-----------|-----------|-----------|-----------|
| 1301.8698i | 44.7799   | 61.9159   | 104.3343  | 123.4342  | 156.5029  |
| 194.9315   | 223.3195  | 251.6875  | 266.7370  | 315.4541  | 413.9173  |
| 527.7814   | 543.1583  | 560.3772  | 590.8864  | 717.2769  | 792.2703  |
| 835.5507   | 883.6104  | 917.7379  | 1011.0178 | 1052.9348 | 1063.5605 |
| 1082.1394  | 1112.2068 | 1139.4233 | 1143.8244 | 1155.2958 | 1169.6150 |
| 1175.0308  | 1227.4288 | 1240.9045 | 1271.9616 | 1295.9804 | 1370.7985 |
| 1377.2604  | 1407.2552 | 1417.1551 | 1432.6367 | 1441.8664 | 1447.7465 |
| 1458.2601  | 1463.4682 | 1674.2565 | 1822.6105 | 2909.8961 | 2960.8421 |
| 2967.3846  | 2971.9139 | 3005.4930 | 3010.6240 | 3017.0225 | 3033.1851 |
| 3044.5982  | 3089.1778 | 3101.2266 |           |           |           |

=====  
Structure 41  
=====

|            |          |          |          |          |          |
|------------|----------|----------|----------|----------|----------|
| 1284.8670i | 34.6686  | 47.8362  | 96.6029  | 122.1775 | 180.7533 |
| 198.3249   | 240.5989 | 250.7111 | 290.9043 | 356.2231 | 421.1913 |
| 524.2128   | 533.3488 | 548.4715 | 582.7509 | 728.8067 | 798.2801 |

|           |           |           |           |           |           |
|-----------|-----------|-----------|-----------|-----------|-----------|
| 823.1629  | 887.2743  | 935.7474  | 973.7892  | 1029.1048 | 1076.2873 |
| 1084.2208 | 1108.6443 | 1139.1369 | 1142.2729 | 1160.9403 | 1167.6496 |
| 1176.6381 | 1196.8435 | 1239.0518 | 1280.9422 | 1332.7575 | 1353.9641 |
| 1378.1446 | 1406.1687 | 1427.8781 | 1433.3768 | 1439.8468 | 1447.8649 |
| 1458.5286 | 1463.5528 | 1665.0692 | 1819.9144 | 2956.4976 | 2965.6146 |
| 2969.8075 | 2979.4316 | 3004.3280 | 3013.9229 | 3021.6142 | 3037.9193 |
| 3045.0732 | 3089.5589 | 3100.3529 |           |           |           |

=====  
Structure 42  
=====

|            |           |           |           |           |           |
|------------|-----------|-----------|-----------|-----------|-----------|
| 1288.0128i | 32.7136   | 72.4967   | 94.1361   | 104.0594  | 117.6257  |
| 174.7019   | 198.0949  | 250.3542  | 269.1534  | 316.4937  | 451.0862  |
| 504.4783   | 534.0781  | 558.0346  | 591.4827  | 734.3001  | 783.7312  |
| 848.8670   | 895.9542  | 922.2455  | 967.9623  | 1059.3985 | 1074.0213 |
| 1087.8864  | 1105.8944 | 1138.9080 | 1144.6639 | 1151.3623 | 1159.5331 |
| 1184.0978  | 1213.8429 | 1258.1502 | 1277.2877 | 1314.2874 | 1318.3710 |
| 1383.2926  | 1411.2598 | 1425.3941 | 1442.4939 | 1446.2922 | 1448.9656 |
| 1458.2766  | 1462.0266 | 1679.8411 | 1823.4838 | 2958.6741 | 2959.9723 |
| 2967.4916  | 2986.2378 | 3001.5539 | 3008.0827 | 3013.1056 | 3037.5977 |
| 3044.0321  | 3089.7167 | 3098.1930 |           |           |           |

=====  
Structure 43  
=====

|            |           |           |           |           |           |
|------------|-----------|-----------|-----------|-----------|-----------|
| 1300.1062i | 45.4192   | 54.2132   | 91.6137   | 120.0222  | 169.7861  |
| 197.2067   | 213.3028  | 255.5419  | 276.8001  | 351.2279  | 431.9662  |
| 523.9355   | 534.9647  | 557.4231  | 582.2326  | 729.8546  | 789.5410  |
| 838.8664   | 886.0101  | 933.2469  | 959.3911  | 1053.8843 | 1060.6047 |
| 1081.6206  | 1110.0724 | 1139.4765 | 1146.1415 | 1154.0722 | 1165.2093 |
| 1174.2506  | 1223.0252 | 1247.1208 | 1277.2243 | 1314.8510 | 1348.0457 |
| 1376.4004  | 1408.9998 | 1424.4583 | 1432.8830 | 1447.7836 | 1452.1755 |
| 1458.2571  | 1463.3899 | 1670.5181 | 1820.9416 | 2964.0580 | 2968.0034 |
| 2973.5355  | 2977.9448 | 3008.1091 | 3012.9893 | 3028.7302 | 3036.3715 |
| 3044.7069  | 3089.5111 | 3093.4555 |           |           |           |

=====  
Structure 44  
=====

|            |           |           |           |           |           |
|------------|-----------|-----------|-----------|-----------|-----------|
| 1301.7045i | 28.9302   | 66.6907   | 75.5471   | 112.8179  | 124.7148  |
| 190.4401   | 206.6100  | 245.0558  | 294.2938  | 323.5601  | 438.7598  |
| 502.9382   | 534.6734  | 552.7797  | 590.7900  | 732.2545  | 797.1291  |
| 843.7001   | 881.0448  | 923.2897  | 978.3059  | 1058.4406 | 1074.8817 |
| 1091.9124  | 1106.3292 | 1138.8145 | 1139.5716 | 1148.7148 | 1168.7243 |
| 1170.8371  | 1214.1310 | 1240.2085 | 1284.5124 | 1312.7012 | 1339.5892 |

|           |           |           |           |           |           |
|-----------|-----------|-----------|-----------|-----------|-----------|
| 1385.8100 | 1411.1676 | 1423.8701 | 1435.4237 | 1445.6867 | 1448.2951 |
| 1458.2997 | 1462.3999 | 1667.5057 | 1824.5423 | 2917.1099 | 2957.0281 |
| 2966.8158 | 2988.8408 | 3001.2990 | 3005.4363 | 3022.0445 | 3042.1339 |
| 3043.9594 | 3089.1286 | 3102.6099 |           |           |           |

=====  
Structure 45  
=====

|            |           |           |           |           |           |
|------------|-----------|-----------|-----------|-----------|-----------|
| 1260.9198i | 44.1990   | 92.7366   | 113.8047  | 133.9315  | 136.9822  |
| 202.5117   | 213.5755  | 254.1678  | 298.6210  | 326.4997  | 433.6576  |
| 527.9861   | 530.9072  | 566.6892  | 579.0125  | 749.3368  | 777.8053  |
| 845.3445   | 898.6593  | 923.6988  | 974.6201  | 1030.9804 | 1079.1423 |
| 1084.1809  | 1105.8213 | 1139.7098 | 1147.7600 | 1158.3892 | 1160.6449 |
| 1203.3095  | 1206.7774 | 1243.5043 | 1269.9987 | 1323.2744 | 1339.9329 |
| 1375.6957  | 1408.3402 | 1424.4509 | 1435.9058 | 1446.2933 | 1447.9271 |
| 1458.5281  | 1464.1166 | 1698.9541 | 1820.6086 | 2953.1350 | 2961.6076 |
| 2967.4581  | 2980.5840 | 3001.7066 | 3009.4637 | 3020.3169 | 3038.7674 |
| 3045.2790  | 3089.2349 | 3109.7316 |           |           |           |

=====  
Structure 46  
=====

|            |           |           |           |           |           |
|------------|-----------|-----------|-----------|-----------|-----------|
| 1259.7316i | 49.9467   | 63.3141   | 99.8362   | 124.8695  | 173.6471  |
| 197.0422   | 202.9357  | 285.5801  | 324.2159  | 350.3561  | 455.4139  |
| 480.7262   | 551.6711  | 566.0954  | 711.1046  | 715.6598  | 788.7816  |
| 819.6799   | 895.0865  | 938.2778  | 959.6032  | 1031.3299 | 1067.1429 |
| 1091.7730  | 1104.8998 | 1138.6354 | 1142.9375 | 1160.5136 | 1166.5199 |
| 1174.5400  | 1191.4298 | 1258.6073 | 1285.5039 | 1315.0064 | 1341.6927 |
| 1357.1177  | 1419.6982 | 1437.8169 | 1441.4443 | 1448.2893 | 1452.9252 |
| 1464.1299  | 1467.3421 | 1686.5567 | 1813.3432 | 2941.2888 | 2969.0062 |
| 2971.4405  | 3004.1542 | 3008.3654 | 3021.7886 | 3030.2863 | 3050.3678 |
| 3063.4056  | 3089.2737 | 3115.7767 |           |           |           |

=====  
Structure 47  
=====

|            |           |           |           |           |           |
|------------|-----------|-----------|-----------|-----------|-----------|
| 1289.4707i | 47.7109   | 61.5951   | 107.1585  | 115.2627  | 156.2913  |
| 161.6869   | 203.0508  | 256.2754  | 279.5131  | 333.6466  | 394.5694  |
| 468.6762   | 556.0111  | 585.2156  | 707.7657  | 711.2717  | 788.7944  |
| 831.7337   | 894.5199  | 916.7389  | 1014.8924 | 1043.7528 | 1059.4913 |
| 1087.3404  | 1114.1681 | 1135.7404 | 1141.9080 | 1162.5013 | 1168.2791 |
| 1179.1598  | 1218.8747 | 1250.3658 | 1273.7529 | 1299.9809 | 1330.2733 |
| 1369.4798  | 1417.7788 | 1433.8230 | 1442.9372 | 1446.2570 | 1454.8092 |
| 1463.2927  | 1468.2755 | 1671.5792 | 1820.3055 | 2929.0507 | 2966.2729 |
| 2968.9017  | 2976.3589 | 2998.7501 | 3016.3206 | 3020.6270 | 3047.6400 |



3057.0851      3088.6738      3107.3008

=====  
Structure 48  
=====

|            |           |           |           |           |           |
|------------|-----------|-----------|-----------|-----------|-----------|
| 1282.5037i | 49.9334   | 56.8676   | 101.9836  | 126.6716  | 157.7309  |
| 192.7431   | 199.4748  | 231.5101  | 308.6695  | 329.2444  | 429.4737  |
| 471.8229   | 553.7277  | 565.4144  | 697.4512  | 728.8003  | 781.7761  |
| 826.6755   | 887.7104  | 926.9430  | 995.4297  | 1035.2730 | 1055.7241 |
| 1077.7220  | 1118.6486 | 1140.5671 | 1150.5394 | 1160.7356 | 1170.2103 |
| 1185.6617  | 1194.6373 | 1261.4865 | 1278.8112 | 1301.1524 | 1331.3945 |
| 1374.8181  | 1418.3045 | 1432.6157 | 1442.5808 | 1448.0518 | 1449.1864 |
| 1462.7786  | 1465.3803 | 1672.4178 | 1816.7135 | 2950.4067 | 2960.8218 |
| 2969.7000  | 2990.0132 | 3003.5088 | 3016.1446 | 3018.7318 | 3049.4502 |
| 3059.9601  | 3088.7907 | 3104.1632 |           |           |           |

=====  
Structure 49  
=====

|            |           |           |           |           |           |
|------------|-----------|-----------|-----------|-----------|-----------|
| 1287.0938i | 50.6174   | 57.8241   | 104.1139  | 122.5041  | 158.5302  |
| 194.8381   | 196.4488  | 239.2974  | 296.6135  | 332.6076  | 433.0808  |
| 471.4624   | 557.8595  | 564.0907  | 694.6966  | 733.3185  | 779.6852  |
| 826.7658   | 885.1556  | 923.5506  | 995.9484  | 1039.9508 | 1052.5437 |
| 1095.0139  | 1109.4838 | 1135.6997 | 1142.2766 | 1162.2452 | 1169.7866 |
| 1176.8589  | 1209.8157 | 1261.0265 | 1270.4946 | 1309.2887 | 1331.3019 |
| 1376.4844  | 1418.8379 | 1431.9365 | 1442.0270 | 1448.3529 | 1449.7208 |
| 1462.3888  | 1465.2908 | 1668.5819 | 1816.7566 | 2934.2483 | 2964.2211 |
| 2970.5059  | 2997.5239 | 3005.7954 | 3014.8172 | 3021.0588 | 3050.9461 |
| 3058.8840  | 3089.5261 | 3104.2507 |           |           |           |

=====  
Structure 50  
=====

|            |           |           |           |           |           |
|------------|-----------|-----------|-----------|-----------|-----------|
| 1268.7368i | 37.8997   | 72.0089   | 104.1161  | 129.6170  | 171.4396  |
| 193.5701   | 207.6496  | 250.0514  | 308.0818  | 339.0793  | 449.5202  |
| 472.2529   | 552.2288  | 583.9605  | 696.9219  | 726.2038  | 791.9376  |
| 832.1211   | 884.0174  | 932.0517  | 963.4831  | 1047.7293 | 1072.8034 |
| 1084.0192  | 1109.0326 | 1133.7702 | 1140.6983 | 1161.1381 | 1166.6576 |
| 1174.7505  | 1220.7502 | 1259.5115 | 1265.0425 | 1320.4584 | 1334.3331 |
| 1356.2566  | 1421.1092 | 1437.0472 | 1443.6740 | 1446.9718 | 1454.0034 |
| 1465.2766  | 1468.1778 | 1674.3812 | 1819.2555 | 2929.6010 | 2968.2134 |
| 2971.7163  | 3001.4604 | 3008.6447 | 3023.6609 | 3025.8086 | 3049.2581 |
| 3058.3260  | 3088.9104 | 3108.4127 |           |           |           |

Structure 51

```

=====
1279.2660i    48.3815    68.5556    105.7211    115.9056    133.5083
 160.2766    205.1613    220.5846    298.7753    343.9080    385.9001
 469.1010    552.4417    583.6334    708.6764    712.4558    775.2572
 831.8648    913.0866    918.0617    1011.0294    1046.2254    1054.3982
1061.6528    1120.1436    1141.0655    1151.5720    1156.5166    1162.7165
1197.5385    1214.4525    1256.7607    1283.8570    1293.0801    1324.7025
1354.3711    1424.4799    1442.3506    1443.1389    1447.5949    1455.5486
1463.5002    1468.2370    1696.9623    1820.5213    2955.5390    2965.4906
2967.9965    2997.2404    3001.2627    3016.9945    3021.6557    3045.9828
3059.4001    3088.2700    3103.1906

```

Structure 52

```

=====
1284.8519i    52.1703    85.4196    114.7468    122.9152    168.5954
 179.1892    199.2171    259.0065    313.4858    341.5558    452.2715
 478.2096    564.7829    567.0340    709.1214    716.2268    782.3668
 833.5841    888.2638    938.0205    953.3280    1047.5155    1055.2507
1093.8891    1100.2248    1135.5160    1141.7569    1157.9016    1158.2979
1176.0608    1218.6753    1260.3159    1282.3950    1314.8892    1332.6840
1353.7468    1420.6993    1436.8896    1447.0595    1448.2180    1449.6884
1463.3159    1465.0887    1688.3660    1813.8697    2961.1326    2969.6338
2970.7715    3002.7529    3010.5800    3012.4592    3023.2784    3049.8367
3062.2571    3089.3344    3107.2902

```

Structure 53

```

=====
1304.6696i    49.7626    58.5263    105.3428    119.2313    146.3547
 166.5598    203.6984    254.6713    282.4520    332.2565    393.6009
 469.0644    555.2973    585.2806    706.2799    713.2387    787.6070
 831.8974    894.2477    914.0836    1015.2744    1046.4901    1058.9675
1079.2698    1118.3546    1136.5768    1141.5020    1163.3864    1168.6284
1177.6223    1227.9563    1237.2765    1279.6477    1297.7261    1329.7047
1369.2617    1417.8814    1434.2022    1443.0273    1446.3461    1454.8046
1463.3782    1468.5228    1671.3820    1822.0549    2921.8764    2961.0470
2967.5073    2983.1573    2997.9916    3017.8769    3019.8591    3045.9725
3057.8225    3087.8013    3105.1269

```

Structure 54

|            |           |           |           |           |           |
|------------|-----------|-----------|-----------|-----------|-----------|
| 1289.3940i | 40.0940   | 54.6676   | 103.6484  | 131.4130  | 161.9117  |
| 203.6652   | 211.2284  | 258.2880  | 318.7867  | 326.7888  | 414.2138  |
| 472.9110   | 568.6192  | 585.5255  | 696.1252  | 739.0551  | 787.7856  |
| 833.7555   | 890.3410  | 934.8760  | 951.9044  | 1039.7784 | 1065.3178 |
| 1078.2138  | 1117.5861 | 1141.0842 | 1151.6198 | 1165.8761 | 1171.2684 |
| 1190.4036  | 1208.5283 | 1253.7911 | 1270.4596 | 1318.4277 | 1339.4717 |
| 1362.1855  | 1414.6626 | 1428.6151 | 1442.7834 | 1445.8321 | 1452.9895 |
| 1463.2357  | 1467.1924 | 1673.0296 | 1820.1502 | 2940.3195 | 2957.0223 |
| 2966.6910  | 2984.4150 | 3009.3255 | 3011.2829 | 3020.5206 | 3044.8941 |
| 3065.7747  | 3087.3539 | 3098.0691 |           |           |           |

=====  
Structure 55  
=====

|            |           |           |           |           |           |
|------------|-----------|-----------|-----------|-----------|-----------|
| 1286.3218i | 49.5232   | 58.1385   | 117.0816  | 130.2483  | 163.2660  |
| 202.9830   | 210.8999  | 259.4141  | 319.2531  | 331.6956  | 411.1425  |
| 474.4351   | 568.6669  | 585.0179  | 697.8659  | 735.7898  | 797.6071  |
| 838.9732   | 890.2002  | 926.0792  | 954.5409  | 1041.8111 | 1059.6960 |
| 1078.1748  | 1119.7336 | 1141.1827 | 1151.1291 | 1162.6760 | 1169.2850 |
| 1187.9525  | 1211.8989 | 1244.6584 | 1279.5952 | 1315.9573 | 1339.0684 |
| 1361.3728  | 1415.7998 | 1429.4895 | 1442.2158 | 1445.1825 | 1453.3503 |
| 1462.8650  | 1467.5690 | 1671.2761 | 1820.1760 | 2938.5769 | 2965.2411 |
| 2967.4920  | 2976.5838 | 3003.0278 | 3015.1879 | 3017.0133 | 3045.3161 |
| 3067.8254  | 3087.4167 | 3103.2076 |           |           |           |

=====  
Structure 56  
=====

|            |           |           |           |           |           |
|------------|-----------|-----------|-----------|-----------|-----------|
| 1299.5036i | 42.5181   | 81.9433   | 103.7765  | 129.6273  | 174.8131  |
| 202.2830   | 218.8498  | 266.2106  | 303.6280  | 332.4348  | 424.4608  |
| 521.7972   | 528.0698  | 553.5373  | 577.7924  | 754.5503  | 782.7287  |
| 832.0135   | 891.0375  | 921.5520  | 980.8862  | 1049.7823 | 1073.9757 |
| 1086.1371  | 1095.1121 | 1137.5380 | 1140.0094 | 1148.1199 | 1151.2203 |
| 1172.1976  | 1221.2435 | 1233.0959 | 1266.2914 | 1339.6638 | 1346.8755 |
| 1376.1056  | 1406.3520 | 1425.6379 | 1435.3735 | 1440.0707 | 1447.4688 |
| 1458.6601  | 1464.1030 | 1693.0180 | 1825.0581 | 2911.4344 | 2960.5325 |
| 2967.1900  | 2979.7922 | 2991.3582 | 3006.7736 | 3027.3387 | 3036.7826 |
| 3044.3394  | 3088.5522 | 3111.5352 |           |           |           |

=====  
Structure 57  
=====

|            |          |          |          |          |          |
|------------|----------|----------|----------|----------|----------|
| 1286.8856i | 49.6382  | 66.6291  | 95.7438  | 121.4088 | 133.0825 |
| 186.8040   | 200.4043 | 213.4618 | 315.0633 | 340.7568 | 418.4575 |
| 471.1377   | 551.4967 | 563.8158 | 697.0880 | 728.7573 | 771.7195 |

|           |           |           |           |           |           |
|-----------|-----------|-----------|-----------|-----------|-----------|
| 841.5416  | 878.6911  | 927.3755  | 996.1709  | 1034.8870 | 1049.5423 |
| 1079.4322 | 1117.8056 | 1140.8510 | 1146.1746 | 1156.6413 | 1160.9317 |
| 1181.6870 | 1221.9266 | 1258.6661 | 1283.2860 | 1300.8879 | 1327.4581 |
| 1360.3399 | 1424.8657 | 1438.6241 | 1445.4120 | 1448.1334 | 1451.8403 |
| 1463.1452 | 1465.2601 | 1697.1705 | 1818.4977 | 2960.8291 | 2969.1779 |
| 2973.3947 | 2998.8737 | 3009.0151 | 3012.2030 | 3029.2291 | 3048.6801 |
| 3059.7687 | 3088.6390 | 3097.6572 |           |           |           |

=====  
Structure 58  
=====

|            |           |           |           |           |           |
|------------|-----------|-----------|-----------|-----------|-----------|
| 1295.6786i | 38.5597   | 60.9137   | 96.7247   | 114.3637  | 152.0882  |
| 179.4390   | 206.1836  | 248.9155  | 268.8743  | 328.9235  | 443.5766  |
| 472.8414   | 557.9614  | 582.2054  | 698.0464  | 729.5505  | 775.8297  |
| 832.9654   | 897.5153  | 927.5387  | 958.7970  | 1049.5216 | 1068.8472 |
| 1069.1417  | 1117.9234 | 1140.3337 | 1142.6573 | 1157.5833 | 1163.5847 |
| 1182.7046  | 1229.2724 | 1253.7156 | 1275.7003 | 1316.7892 | 1321.4871 |
| 1352.2575  | 1424.9255 | 1440.3479 | 1445.0893 | 1446.2471 | 1452.3474 |
| 1463.3732  | 1467.4681 | 1678.0209 | 1820.6224 | 2962.2116 | 2965.1828 |
| 2967.2744  | 3002.9765 | 3011.1431 | 3012.9622 | 3018.5494 | 3045.6906 |
| 3059.2613  | 3088.0961 | 3099.4905 |           |           |           |

=====  
Structure 59  
=====

|            |           |           |           |           |           |
|------------|-----------|-----------|-----------|-----------|-----------|
| 1285.3935i | 43.8244   | 61.2053   | 97.0950   | 126.3815  | 131.6325  |
| 183.0914   | 206.9617  | 249.0083  | 272.3395  | 330.9996  | 441.3538  |
| 472.8297   | 556.3648  | 581.6865  | 698.5668  | 727.8040  | 778.0682  |
| 842.2036   | 895.8818  | 922.6055  | 956.2197  | 1046.5086 | 1068.6346 |
| 1077.6151  | 1116.3608 | 1139.0293 | 1143.1806 | 1156.3563 | 1161.5323 |
| 1184.9875  | 1225.5533 | 1253.9570 | 1279.7740 | 1311.9152 | 1325.6186 |
| 1351.8617  | 1425.6953 | 1441.3938 | 1443.9531 | 1446.6301 | 1452.7837 |
| 1463.4734  | 1467.6663 | 1687.4359 | 1820.5155 | 2958.5094 | 2965.2637 |
| 2967.7885  | 2998.2440 | 3004.4249 | 3018.0155 | 3019.0980 | 3045.6782 |
| 3062.2952  | 3088.0123 | 3104.5498 |           |           |           |

=====  
Structure 60  
=====

|            |           |           |           |           |           |
|------------|-----------|-----------|-----------|-----------|-----------|
| 1307.6294i | 33.8097   | 56.6201   | 88.9977   | 133.9135  | 150.3582  |
| 194.3693   | 206.0015  | 243.1381  | 305.7823  | 332.2069  | 423.8892  |
| 469.5854   | 553.1012  | 581.7880  | 696.1534  | 728.5283  | 788.3726  |
| 837.4903   | 884.3855  | 923.0558  | 962.4330  | 1047.0747 | 1072.3748 |
| 1082.7255  | 1108.3122 | 1132.0457 | 1141.6224 | 1162.5406 | 1167.5328 |
| 1173.0265  | 1225.1211 | 1237.7869 | 1285.4458 | 1312.1644 | 1341.1224 |

|           |           |           |           |           |           |
|-----------|-----------|-----------|-----------|-----------|-----------|
| 1355.9857 | 1423.1819 | 1434.4882 | 1442.1350 | 1445.9174 | 1452.9959 |
| 1463.3994 | 1468.0834 | 1668.3149 | 1822.1644 | 2920.0601 | 2966.5713 |
| 2970.2681 | 2995.0128 | 2998.0853 | 3020.6641 | 3026.5652 | 3045.7096 |
| 3066.1707 | 3087.6360 | 3108.7903 |           |           |           |

=====  
Structure 61  
=====

|            |           |           |           |           |           |
|------------|-----------|-----------|-----------|-----------|-----------|
| 1308.3016i | 52.9072   | 70.1657   | 103.0758  | 126.6126  | 174.7461  |
| 199.8946   | 208.5824  | 316.2017  | 322.4826  | 342.2169  | 410.6037  |
| 478.6100   | 561.2063  | 574.7709  | 706.3708  | 731.0211  | 789.7916  |
| 821.9341   | 889.4818  | 930.1126  | 951.3287  | 1032.4807 | 1050.1069 |
| 1094.0668  | 1107.6516 | 1136.5347 | 1141.5613 | 1159.6347 | 1171.9692 |
| 1177.8273  | 1208.1805 | 1249.0835 | 1275.9996 | 1326.3303 | 1337.0534 |
| 1366.1897  | 1414.6470 | 1429.8499 | 1443.0331 | 1447.0450 | 1449.8219 |
| 1463.6872  | 1466.1098 | 1691.5755 | 1818.1590 | 2934.2085 | 2962.9250 |
| 2967.2007  | 2998.6916 | 3007.1958 | 3012.4168 | 3017.2005 | 3045.8011 |
| 3067.9291  | 3087.0269 | 3097.8016 |           |           |           |

=====  
Structure 62  
=====

|            |           |           |           |           |           |
|------------|-----------|-----------|-----------|-----------|-----------|
| 1261.4432i | 49.8956   | 76.8702   | 109.5498  | 119.8854  | 149.7394  |
| 184.9531   | 201.8004  | 270.0620  | 310.4991  | 343.2663  | 410.4712  |
| 472.2041   | 549.4243  | 563.2280  | 697.8659  | 739.7668  | 784.4822  |
| 826.6922   | 898.6805  | 927.4386  | 971.2977  | 1041.4651 | 1062.4149 |
| 1079.1291  | 1110.3305 | 1135.1187 | 1141.5970 | 1163.8808 | 1169.4278 |
| 1177.2095  | 1210.4242 | 1242.9596 | 1282.9382 | 1322.5090 | 1336.5454 |
| 1360.0576  | 1424.0163 | 1434.9700 | 1439.1723 | 1448.0858 | 1452.0356 |
| 1461.6409  | 1464.9204 | 1678.6419 | 1814.9669 | 2941.8126 | 2971.4016 |
| 2974.7174  | 2999.4839 | 2999.8987 | 3021.3318 | 3029.3177 | 3054.9495 |
| 3059.2967  | 3091.3949 | 3113.8995 |           |           |           |

=====  
Structure 63  
=====

|            |           |           |           |           |           |
|------------|-----------|-----------|-----------|-----------|-----------|
| 1296.3479i | 39.3049   | 64.5952   | 104.2047  | 118.3181  | 147.6173  |
| 186.2201   | 193.8875  | 260.6300  | 302.8334  | 336.1233  | 430.6670  |
| 472.3974   | 558.0780  | 564.1046  | 695.1944  | 736.1834  | 769.6511  |
| 835.7405   | 902.6442  | 931.5238  | 973.9184  | 1025.1261 | 1063.5813 |
| 1078.2884  | 1115.8101 | 1140.0351 | 1149.9926 | 1161.6963 | 1167.5889 |
| 1194.4102  | 1202.0935 | 1264.6031 | 1286.7300 | 1313.8110 | 1330.6712 |
| 1354.6621  | 1422.5410 | 1435.8959 | 1439.7836 | 1448.0934 | 1449.6636 |
| 1461.8490  | 1464.8684 | 1661.7899 | 1813.8376 | 2962.6282 | 2967.1559 |
| 2972.5141  | 2997.5321 | 3011.4790 | 3014.0391 | 3021.5381 | 3053.1784 |

3058.0532      3090.2276      3122.0268

=====  
Structure 64  
=====

|            |           |           |           |           |           |
|------------|-----------|-----------|-----------|-----------|-----------|
| 1287.6733i | 31.9957   | 75.6198   | 92.5181   | 135.4597  | 177.9738  |
| 187.1984   | 216.2425  | 235.2771  | 299.4130  | 348.8200  | 439.0844  |
| 454.2016   | 562.2027  | 564.9834  | 693.8243  | 757.6687  | 787.3606  |
| 818.2885   | 896.1034  | 936.7593  | 965.7394  | 1040.7871 | 1069.1060 |
| 1079.3293  | 1115.3026 | 1138.5473 | 1145.5617 | 1158.6064 | 1167.2079 |
| 1180.8582  | 1190.5975 | 1259.4041 | 1270.6626 | 1328.5312 | 1338.1274 |
| 1346.3782  | 1425.6423 | 1436.5701 | 1443.2321 | 1445.4135 | 1453.3809 |
| 1462.4519  | 1464.5738 | 1666.9421 | 1818.3514 | 2923.0811 | 2967.1788 |
| 2970.2835  | 2991.8850 | 2995.7387 | 3019.3296 | 3027.5177 | 3050.9340 |
| 3053.4915  | 3089.8122 | 3116.3811 |           |           |           |

## S.4. Recrossing and Semiclassical Transmission Coefficients

### S.4.1 ( $R_{\alpha'}$ )

| T (K)   | Gamma<br>CVT | Kappa<br>CVT/SCT |
|---------|--------------|------------------|
| 200.00  | 7.1064E-01   | 3.8099E+02       |
| 298.15  | 7.4204E-01   | 1.2720E+01       |
| 300.00  | 7.4248E-01   | 1.2304E+01       |
| 500.00  | 7.7424E-01   | 2.3632E+00       |
| 750.00  | 7.9031E-01   | 1.4544E+00       |
| 1000.00 | 7.9605E-01   | 1.2325E+00       |
| 1100.00 | 7.9705E-01   | 1.1882E+00       |
| 1150.00 | 7.9738E-01   | 1.1708E+00       |
| 1200.00 | 7.9763E-01   | 1.1557E+00       |
| 1250.00 | 7.9781E-01   | 1.1426E+00       |
| 1300.00 | 7.9793E-01   | 1.1311E+00       |
| 1350.00 | 7.9799E-01   | 1.1209E+00       |
| 1400.00 | 7.9801E-01   | 1.1120E+00       |
| 1450.00 | 7.9800E-01   | 1.1040E+00       |
| 1500.00 | 7.9796E-01   | 1.0968E+00       |
| 1550.00 | 7.9789E-01   | 1.0904E+00       |
| 1600.00 | 7.9780E-01   | 1.0846E+00       |
| 1650.00 | 7.9769E-01   | 1.0793E+00       |
| 1700.00 | 7.9756E-01   | 1.0745E+00       |
| 1800.00 | 7.9728E-01   | 1.0662E+00       |
| 1900.00 | 7.9696E-01   | 1.0592E+00       |
| 2000.00 | 7.9663E-01   | 1.0532E+00       |
| 2500.00 | 7.9483E-01   | 1.0338E+00       |

### S.4.2 ( $R_{\alpha}$ )

| T (K)   | Gamma<br>CVT | Kappa<br>CVT/SCT |
|---------|--------------|------------------|
| 200.00  | 9.9930E-01   | 7.7712E+01       |
| 298.15  | 9.9945E-01   | 7.4009E+00       |
| 300.00  | 9.9946E-01   | 7.2276E+00       |
| 500.00  | 9.9959E-01   | 2.0953E+00       |
| 750.00  | 9.9967E-01   | 1.3987E+00       |
| 1000.00 | 9.9971E-01   | 1.2097E+00       |
| 1100.00 | 9.9972E-01   | 1.1707E+00       |
| 1150.00 | 9.9972E-01   | 1.1553E+00       |
| 1200.00 | 9.9972E-01   | 1.1419E+00       |

|         |            |            |
|---------|------------|------------|
| 1250.00 | 9.9973E-01 | 1.1302E+00 |
| 1300.00 | 9.9973E-01 | 1.1198E+00 |
| 1350.00 | 9.9973E-01 | 1.1107E+00 |
| 1400.00 | 9.9973E-01 | 1.1026E+00 |
| 1450.00 | 9.9974E-01 | 1.0954E+00 |
| 1500.00 | 9.9974E-01 | 1.0889E+00 |
| 1550.00 | 9.9974E-01 | 1.0831E+00 |
| 1600.00 | 9.9974E-01 | 1.0778E+00 |
| 1650.00 | 9.9974E-01 | 1.0730E+00 |
| 1700.00 | 9.9974E-01 | 1.0686E+00 |
| 1800.00 | 9.9975E-01 | 1.0610E+00 |
| 1900.00 | 9.9975E-01 | 1.0546E+00 |
| 2000.00 | 9.9975E-01 | 1.0492E+00 |
| 2500.00 | 9.9975E-01 | 1.0313E+00 |

### S.4.3 ( $R_\beta$ )

| T (K)   | Gamma<br>CVT | Kappa<br>CVT/SCT |
|---------|--------------|------------------|
| 200.00  | 9.7491E-01   | 7.4258E+01       |
| 298.15  | 9.8883E-01   | 6.6740E+00       |
| 300.00  | 9.8898E-01   | 6.5155E+00       |
| 500.00  | 9.9685E-01   | 1.9195E+00       |
| 750.00  | 9.9898E-01   | 1.3219E+00       |
| 1000.00 | 9.9954E-01   | 1.1634E+00       |
| 1100.00 | 9.9964E-01   | 1.1311E+00       |
| 1150.00 | 9.9968E-01   | 1.1185E+00       |
| 1200.00 | 9.9971E-01   | 1.1074E+00       |
| 1250.00 | 9.9974E-01   | 1.0978E+00       |
| 1300.00 | 9.9977E-01   | 1.0894E+00       |
| 1350.00 | 9.9979E-01   | 1.0820E+00       |
| 1400.00 | 9.9980E-01   | 1.0755E+00       |
| 1450.00 | 9.9982E-01   | 1.0696E+00       |
| 1500.00 | 9.9983E-01   | 1.0645E+00       |
| 1550.00 | 9.9984E-01   | 1.0598E+00       |
| 1600.00 | 9.9985E-01   | 1.0555E+00       |
| 1650.00 | 9.9986E-01   | 1.0518E+00       |
| 1700.00 | 9.9987E-01   | 1.0483E+00       |
| 1800.00 | 9.9988E-01   | 1.0422E+00       |
| 1900.00 | 9.9990E-01   | 1.0373E+00       |
| 2000.00 | 9.9990E-01   | 1.0330E+00       |
| 2500.00 | 9.9993E-01   | 1.0194E+00       |



#### S.4.4 ( $R_\gamma$ )

| T (K)   | Gamma<br>CVT | Kappa<br>CVT/SCT |
|---------|--------------|------------------|
| 200.00  | 5.6022E-01   | 4.7494E+01       |
| 298.15  | 6.3616E-01   | 5.5974E+00       |
| 300.00  | 6.3716E-01   | 5.4799E+00       |
| 500.00  | 7.0199E-01   | 1.8449E+00       |
| 750.00  | 7.3046E-01   | 1.3121E+00       |
| 1000.00 | 7.4084E-01   | 1.1646E+00       |
| 1100.00 | 7.4295E-01   | 1.1340E+00       |
| 1150.00 | 7.4375E-01   | 1.1220E+00       |
| 1200.00 | 7.4441E-01   | 1.1114E+00       |
| 1250.00 | 7.4497E-01   | 1.1022E+00       |
| 1300.00 | 7.4543E-01   | 1.0941E+00       |
| 1350.00 | 7.4582E-01   | 1.0869E+00       |
| 1400.00 | 7.4614E-01   | 1.0805E+00       |
| 1450.00 | 7.4640E-01   | 1.0748E+00       |
| 1500.00 | 7.4661E-01   | 1.0697E+00       |
| 1550.00 | 7.4678E-01   | 1.0651E+00       |
| 1600.00 | 7.4692E-01   | 1.0610E+00       |
| 1650.00 | 7.4702E-01   | 1.0572E+00       |
| 1700.00 | 7.4710E-01   | 1.0538E+00       |
| 1800.00 | 7.4719E-01   | 1.0478E+00       |
| 1900.00 | 7.4722E-01   | 1.0427E+00       |
| 2000.00 | 7.4720E-01   | 1.0385E+00       |
| 2500.00 | 7.4668E-01   | 1.0244E+00       |

#### S.4.5 ( $R_\delta$ )

| T (K)   | Gamma<br>CVT | Kappa<br>CVT/SCT |
|---------|--------------|------------------|
| 200.00  | 9.8554E-01   | 1.4591E+02       |
| 298.15  | 9.9403E-01   | 7.4415E+00       |
| 300.00  | 9.9412E-01   | 7.2361E+00       |
| 500.00  | 9.9854E-01   | 1.8953E+00       |
| 750.00  | 9.9965E-01   | 1.3046E+00       |
| 1000.00 | 9.9990E-01   | 1.1528E+00       |
| 1100.00 | 9.9994E-01   | 1.1222E+00       |
| 1150.00 | 9.9995E-01   | 1.1102E+00       |
| 1200.00 | 9.9996E-01   | 1.0998E+00       |
| 1250.00 | 9.9997E-01   | 1.0907E+00       |
| 1300.00 | 9.9998E-01   | 1.0828E+00       |

|         |  |            |  |            |  |
|---------|--|------------|--|------------|--|
| 1350.00 |  | 9.9998E-01 |  | 1.0759E+00 |  |
| 1400.00 |  | 9.9999E-01 |  | 1.0697E+00 |  |
| 1450.00 |  | 9.9999E-01 |  | 1.0641E+00 |  |
| 1500.00 |  | 9.9999E-01 |  | 1.0593E+00 |  |
| 1550.00 |  | 9.9999E-01 |  | 1.0549E+00 |  |
| 1600.00 |  | 1.0000E+00 |  | 1.0509E+00 |  |
| 1650.00 |  | 1.0000E+00 |  | 1.0473E+00 |  |
| 1700.00 |  | 1.0000E+00 |  | 1.0441E+00 |  |
| 1800.00 |  | 1.0000E+00 |  | 1.0385E+00 |  |
| 1900.00 |  | 1.0000E+00 |  | 1.0338E+00 |  |
| 2000.00 |  | 1.0000E+00 |  | 1.0299E+00 |  |
| 2500.00 |  | 1.0000E+00 |  | 1.0171E+00 |  |

Table S.1.: All conformers of MP, the torsional angles, and the difference in energy between them (in kcal/mol).

| Structures | $(\phi_1, \phi_2, \phi_3, \phi_4)$ | $U_{jx}$ |
|------------|------------------------------------|----------|
| TG+T-T-    | (180,070,194,182)                  | 0.000    |
| TTTT       | (180,180,180,180)                  | 0.146    |
| G-G-T+T+   | (296,293,164,178)                  | 0.687    |
| G-T-T-T    | (297,185,182,180)                  | 0.728    |
| T-G-G-T-   | (181,299,318,182)                  | 0.822    |
| TTG-T      | (180,180,303,180)                  | 0.995    |
| G-g+T-T-   | (301,084,207,183)                  | 1.102    |
| G-G-G-T+   | (303,306,300,179)                  | 1.216    |
| G-T-G-T    | (297,184,303,180)                  | 1.556    |
| G-T-G+T    | (297,183,060,180)                  | 1.593    |
| G-G+G+T+   | (296,074,043,179)                  | 1.798    |
| TG-T+C-    | (180,289,172,358)                  | 8.065    |
| TTTC       | (180,180,180,000)                  | 8.144    |
| G-T-TC     | (297,184,180,000)                  | 8.726    |
| G-G-T+C-   | (296,290,172,358)                  | 8.776    |
| G-g+T-C+   | (301,089,191,002)                  | 9.485    |
| T+T-g-C-   | (179,183,270,354)                  | 9.744    |
| G-G-g-C-   | (302,304,273,352)                  | 9.924    |
| T-G-g-C-   | (182,297,275,351)                  | 9.990    |
| G-T-g-C-   | (296,185,270,354)                  | 10.264   |
| G-T-g+C+   | (298,182,089,007)                  | 10.323   |
| g+G-g-C-   | (090,308,276,350)                  | 11.690   |
| G-a+G+C+   | (297,097,074,013)                  | 11.960   |

Table S.2.: All conformers of  $(\text{TS}_{\alpha'})^{\ddagger}$ , the torsional angles, and the difference in energy between them (in kcal/mol).

| Structures | $(\phi_1, \phi_2, \phi_3, \phi_4, \phi_5)$ | $U_{j_x}$ |
|------------|--------------------------------------------|-----------|
| TG-T+T+g-  | (180,290,167,177,280)                      | 0.000     |
| TG-T+T+g+  | (180,290,167,179,080)                      | 0.000     |
| TTT+T+g-   | (180,180,179,179,279)                      | 0.111     |
| G-G-T+T+g+ | (296,293,165,179,080)                      | 0.671     |
| G-G-T+T+g- | (296,292,165,177,280)                      | 0.680     |
| G-T-T-T-g+ | (297,185,182,181,080)                      | 0.688     |
| G-T-TT+g-  | (297,184,180,179,279)                      | 0.690     |
| T-G-G-T+g- | (181,300,313,179,279)                      | 0.741     |
| T-G-G-T-g+ | (181,299,316,182,080)                      | 0.832     |
| TTG+T-g+   | (180,180,064,182,081)                      | 0.960     |
| TTG-T-g+   | (180,180,301,181,080)                      | 0.979     |
| G-g+T-T-g- | (301,083,209,181,281)                      | 1.016     |
| G-G-G-T+g- | (302,306,298,177,280)                      | 1.057     |
| G+g-T+T+g- | (059,275,155,176,280)                      | 1.125     |
| G-G-G-Tg+  | (302,306,301,180,080)                      | 1.210     |
| G-T-G-T+g- | (297,184,296,178,279)                      | 1.512     |
| G-T-G-T-g+ | (297,184,301,181,081)                      | 1.532     |
| G-T-G+T-g+ | (297,183,067,182,081)                      | 1.539     |
| G-G+G+Tg+  | (295,073,044,180,079)                      | 1.598     |
| G-G+G+T+g- | (296,074,043,178,280)                      | 1.829     |
| TG-T+CG-   | (180,289,170,000,288)                      | 6.868     |
| TT-T-C+G+  | (180,181,185,001,072)                      | 6.987     |
| TG-T+C+G+  | (180,287,179,001,070)                      | 7.074     |
| G-G-T+CG-  | (298,291,168,000,288)                      | 7.420     |
| G-T-T-C+G+ | (297,184,185,001,072)                      | 7.538     |
| G-T-T+C-G- | (296,183,174,359,288)                      | 7.554     |
| G-G-T+C+G+ | (295,288,179,001,070)                      | 7.801     |
| G+g-T+C-G- | (058,272,166,359,288)                      | 8.173     |
| T-T+g+C+G+ | (181,177,090,002,071)                      | 8.513     |
| G+a-T+C+G+ | (060,269,177,001,069)                      | 8.579     |
| G+G+g+C+G+ | (058,056,088,005,070)                      | 8.718     |
| T-G-g-C-G- | (182,297,274,354,290)                      | 8.737     |
| T+T-A-C-G+ | (179,183,254,350,065)                      | 8.842     |
| G+T+a+C+G+ | (065,175,091,003,071)                      | 9.010     |
| G+T+g-C-G- | (062,178,270,357,289)                      | 9.091     |
| G-G-g-C+g+ | (301,311,284,005,087)                      | 9.215     |
| T+G+G+C-g- | (177,044,071,357,273)                      | 9.227     |
| T-T+g+C-g- | (181,176,080,354,271)                      | 9.266     |
| G+G+a+C+G- | (057,058,093,018,291)                      | 9.339     |
| T+G+a+C+G- | (178,066,091,020,291)                      | 9.396     |
| G-T-g+C-g- | (298,181,080,354,271)                      | 9.879     |
| g-G+g+C+G+ | (270,051,085,006,070)                      | 10.499    |
| G+a-G-C-G- | (063,263,285,350,291)                      | 10.693    |
| g+G-g-C+g+ | (087,305,283,002,090)                      | 10.749    |
| a+G-g-C-G+ | (093,306,273,337,071)                      | 11.361    |
| G+a-G-C-G+ | (064,266,285,333,070)                      | 11.626    |

Table S.3.: All conformers of  $(\text{TS}_\alpha)^\ddagger$ , the torsional angles, and the difference in energy between them (in kcal/mol).

| Structures | $(\phi_1, \phi_2, \phi_3, \phi_4)$ | $U_{jx}$ |
|------------|------------------------------------|----------|
| T+G+T-T-   | (179,072,195,183)                  | 0.000    |
| T-T-T-T-   | (181,188,195,182)                  | 0.308    |
| G+G+T-T-   | (063,070,195,183)                  | 0.623    |
| G-g+T-T-   | (300,088,199,183)                  | 0.795    |
| G-T-T-T-   | (299,194,195,183)                  | 0.846    |
| T+G+C+T+   | (179,068,028,178)                  | 0.880    |
| T+G-T-T-   | (179,290,186,181)                  | 0.913    |
| T-T-C+T+   | (181,183,028,178)                  | 1.071    |
| G+T+T-T-   | (062,171,192,182)                  | 1.176    |
| G+G+C+T+   | (062,065,030,178)                  | 1.408    |
| G-g+G+T+   | (297,080,033,178)                  | 1.552    |
| G-T-C+T+   | (296,186,028,178)                  | 1.690    |
| G+T+C+T+   | (061,169,027,178)                  | 1.886    |
| G+a-T-T-   | (061,266,185,181)                  | 2.101    |
| G-G-T-T-   | (308,309,192,182)                  | 2.209    |
| T+g-C+T+   | (178,283,015,179)                  | 2.256    |
| G-G-G+T+   | (305,305,042,178)                  | 3.506    |
| G+a-C+T+   | (064,259,016,178)                  | 3.587    |
| g-g-C+T+   | (277,281,018,178)                  | 3.824    |
| TG+T-C+    | (180,074,187,002)                  | 8.039    |
| T-T-T-C+   | (181,185,186,002)                  | 8.374    |
| G+G+T-C+   | (063,072,187,001)                  | 8.703    |
| T+G-T-C+   | (178,290,182,004)                  | 8.859    |
| G-T-T-C+   | (297,189,186,002)                  | 8.956    |
| G-g+T-C+   | (299,090,189,002)                  | 9.099    |
| G+T+T-C+   | (062,170,186,003)                  | 9.208    |
| G+a-T-C+   | (060,266,183,005)                  | 10.127   |

Table S.4.: All conformers of  $(\text{TS}_\beta)^\ddagger$ , the torsional angles, and the difference in energy between them (in kcal/mol).

| Structures | $(\phi_1, \phi_2, \phi_3, \phi_4)$ | $U_{jx}$ |
|------------|------------------------------------|----------|
| T+G+T-T-   | (177,073,186,181)                  | 0.000    |
| T+T+T+T+   | (177,176,165,178)                  | 0.199    |
| G+G+T-T-   | (051,069,188,181)                  | 0.644    |
| G+T+T+T+   | (053,171,166,178)                  | 0.732    |
| G-T+T+T+   | (289,177,164,178)                  | 0.741    |
| T+G+G+T+   | (177,067,038,178)                  | 0.768    |
| G+G+a+T-   | (050,063,093,183)                  | 0.825    |
| G-g+T-T-   | (297,089,199,183)                  | 0.891    |
| T+G+a-T+   | (177,072,260,178)                  | 0.945    |
| T+T-G-T-   | (178,187,328,181)                  | 1.014    |
| G+G+g-T+   | (051,068,271,178)                  | 1.041    |
| T+G-T+T+   | (179,299,175,179)                  | 1.050    |
| G-g+G+T+   | (291,077,044,179)                  | 1.278    |
| G-T-G-T-   | (291,189,326,181)                  | 1.492    |
| G-G-T+T+   | (293,301,172,178)                  | 1.629    |
| G+T-G-T-   | (053,182,326,181)                  | 1.679    |
| TG-G-T-    | (180,311,313,182)                  | 1.733    |
| G-G-G-T+   | (298,316,295,179)                  | 1.905    |
| G-G-a+T-   | (295,308,095,182)                  | 2.343    |
| G+G-G-T+   | (061,299,308,179)                  | 3.024    |
| G+G-T+T+   | (052,285,152,177)                  | 3.037    |
| G+A-G+T-   | (060,242,073,184)                  | 3.988    |
| T+G+T-C+   | (177,075,184,001)                  | 8.033    |
| T+T+T+C-   | (177,176,173,357)                  | 8.510    |
| G+G+T-C+   | (050,070,184,001)                  | 8.672    |
| G+T+T+C-   | (052,171,173,357)                  | 9.052    |
| G-T+T+C-   | (288,176,172,357)                  | 9.063    |
| G-a+T-C+   | (296,093,187,002)                  | 9.089    |
| G+G+g+C+   | (051,061,089,007)                  | 9.346    |
| T+G+g+C+   | (178,069,089,007)                  | 9.346    |
| TG-T+C     | (180,297,177,000)                  | 9.498    |
| G-G-a-C-   | (298,309,262,356)                  | 10.008   |
| G-G-T+C    | (293,299,176,000)                  | 10.061   |
| T-G-a-C-   | (181,302,262,355)                  | 10.120   |
| a-G+g+C+   | (267,055,085,008)                  | 10.511   |
| G-a+g+C+   | (292,104,077,012)                  | 10.782   |
| T+Tg-C-    | (177,180,279,349)                  | 10.887   |
| G-T+g-C-   | (285,169,281,348)                  | 11.287   |
| G+T+g-C-   | (052,174,280,349)                  | 11.392   |
| T+G-a+C+   | (174,305,105,003)                  | 11.590   |
| G+a-g-C-   | (057,262,282,353)                  | 11.703   |
| G+g-T+C-   | (054,278,173,358)                  | 11.818   |
| g+G-a-C-   | (081,328,265,359)                  | 11.921   |

Table S.5.: All conformers of  $(\text{TS}_\gamma)^\ddagger$ , the torsional angles, and the difference in energy between them (in kcal/mol).

| Structures | $(\phi_1, \phi_2, \phi_3, \phi_4)$ | $U_{jx}$ |
|------------|------------------------------------|----------|
| T+G+T-T-   | (177,070,189,181)                  | 0.000    |
| T+T+T+T    | (176,179,179,180)                  | 0.293    |
| G-G-T+T+   | (294,293,167,178)                  | 0.805    |
| G+g-T+T+   | (051,278,160,177)                  | 0.924    |
| G+T+TT     | (055,175,180,180)                  | 0.951    |
| G-T-TT     | (291,181,180,180)                  | 1.021    |
| T-G-G-T+   | (183,297,304,178)                  | 1.196    |
| T+g-A+T+   | (171,281,144,179)                  | 1.228    |
| T+G+G+T+   | (178,064,034,178)                  | 1.271    |
| G+G+G+T-   | (046,058,064,183)                  | 1.317    |
| G-g+T-T-   | (293,080,206,183)                  | 1.335    |
| T+T+G+T+   | (176,179,046,179)                  | 1.335    |
| T+T+G-T-   | (176,179,315,181)                  | 1.456    |
| G-G-G-T+   | (300,305,297,179)                  | 1.461    |
| G+G+A-T+   | (050,064,253,177)                  | 1.571    |
| G-G+G+T-   | (286,067,049,181)                  | 1.728    |
| G-T-G-T    | (292,181,303,180)                  | 1.796    |
| G-T-G+T    | (291,181,058,180)                  | 1.807    |
| G+T+G-T-   | (055,177,309,181)                  | 1.991    |
| G+G-G-T-   | (052,285,323,182)                  | 2.041    |
| T+G+T-C+   | (176,071,187,002)                  | 7.834    |
| T+T+T+C-   | (175,179,177,358)                  | 8.178    |
| G+T+T-C+   | (057,177,183,001)                  | 8.867    |
| G-G-T+C-   | (295,292,174,359)                  | 8.934    |
| G+g-T+C-   | (052,275,170,358)                  | 8.961    |
| G-T-TC     | (291,181,180,000)                  | 9.084    |
| G-g+T-C+   | (291,084,191,001)                  | 9.723    |
| T+T-g+C+   | (179,185,087,008)                  | 9.760    |
| T+g-T+C-   | (164,275,168,357)                  | 9.972    |
| G-G-g-C-   | (299,304,272,353)                  | 10.126   |
| A+G-T+C-   | (125,290,170,355)                  | 10.165   |
| G+T+g-C-   | (052,171,274,352)                  | 10.267   |
| TG+g+C+    | (180,067,087,008)                  | 10.364   |
| T+T-g-C-   | (175,181,270,354)                  | 10.487   |
| g+g+T-C+   | (078,084,191,004)                  | 10.497   |
| G-T+g+C+   | (292,178,090,006)                  | 10.713   |
| G-T-g-C-   | (291,183,270,353)                  | 10.746   |
| G+T+a+C+   | (057,175,091,006)                  | 11.138   |
| T-G-g-C-   | (192,309,274,354)                  | 11.165   |
| a-G+g+C+   | (268,056,085,010)                  | 11.267   |
| G+a-G-C-   | (055,266,285,347)                  | 12.221   |

Table S.6.: All conformers of  $(\text{TS}_\delta)^\ddagger$ , the torsional angles, and the difference in energy between them (in kcal/mol).

| Structures | $(\phi_1, \phi_2, \phi_3, \phi_4, \phi_5)$ | $U_{jx}$ |
|------------|--------------------------------------------|----------|
| TG-T+T+G+  | (180,290,168,178,062)                      | 0.000    |
| TG-T+T+T+  | (180,290,167,178,179)                      | 0.320    |
| G-G-T+T+g+ | (303,296,169,179,077)                      | 0.332    |
| TTTTT      | (180,180,180,180,180)                      | 0.452    |
| T-G-T+T+G- | (184,291,168,178,299)                      | 0.453    |
| T+T+T+T+G- | (179,178,176,179,296)                      | 0.478    |
| G+g-T+TG-  | (063,274,168,180,287)                      | 0.491    |
| G-T-TTg+   | (298,185,180,180,076)                      | 0.656    |
| G-G-T+T+G- | (296,293,167,178,300)                      | 0.683    |
| G-G-T+T+T- | (297,292,165,178,186)                      | 0.910    |
| G-T-T-TT-  | (297,184,181,180,187)                      | 0.928    |
| TG-G-T-G+  | (180,298,319,182,062)                      | 1.008    |
| G-T-T-T-G- | (297,187,185,181,301)                      | 1.076    |
| T-G-G-T-G- | (182,299,318,181,297)                      | 1.109    |
| G+g-T+T+T+ | (059,279,152,177,173)                      | 1.150    |
| T-G-G-T-T  | (181,298,320,182,180)                      | 1.265    |
| TTG-T-G-   | (180,180,309,181,297)                      | 1.333    |
| T+T-G-TG+  | (179,181,306,180,063)                      | 1.336    |
| TTG-TT     | (180,180,304,180,180)                      | 1.363    |
| G-G-G-T+G- | (305,307,299,179,307)                      | 1.417    |
| G+G+G+T-T+ | (057,054,061,181,174)                      | 1.532    |
| G-T-G-Tg+  | (298,184,304,180,077)                      | 1.656    |
| G-T-G+Tg+  | (300,184,063,180,077)                      | 1.710    |
| G-G+G+T+T- | (295,071,046,179,189)                      | 1.765    |
| G-T-G-TT-  | (297,183,306,180,188)                      | 1.806    |
| G-G+G+T-G- | (297,075,047,182,304)                      | 1.869    |
| G-T-G+TT-  | (297,183,057,180,187)                      | 1.876    |
| G-G-C-T-g+ | (298,297,331,182,077)                      | 1.894    |
| G-T-G-TG-  | (296,184,306,180,300)                      | 1.973    |
| G-T-G+T+G- | (295,183,053,179,299)                      | 1.992    |
| G+g-A+T+G+ | (060,274,150,177,061)                      | 2.148    |
| G+g-C-T-G- | (069,277,344,181,288)                      | 2.599    |
| G-G-T+C-G+ | (302,295,168,356,075)                      | 7.839    |
| TG-T+C-G+  | (180,289,173,358,062)                      | 8.044    |
| G+g-T+C-G- | (060,273,168,354,287)                      | 8.150    |
| G-T-T+C-g+ | (299,185,179,359,076)                      | 8.266    |
| TG-T+C-T+  | (180,289,172,358,178)                      | 8.430    |
| TTTCT      | (180,180,180,000,180)                      | 8.483    |
| T-T-T-C+G+ | (181,182,182,001,065)                      | 8.571    |
| T-G-T+C-G- | (184,290,173,358,299)                      | 8.613    |
| G-G-T+C-G- | (296,291,173,359,301)                      | 8.785    |
| G-T-TCT-   | (297,184,180,000,187)                      | 8.981    |
| G-G-T+C-T- | (297,290,173,359,188)                      | 9.067    |
| G-T-T-C+G- | (297,186,182,001,302)                      | 9.209    |
| G-g+T-C+T- | (300,086,192,001,186)                      | 9.603    |
| G+G+g+C+G+ | (055,056,088,008,048)                      | 9.993    |
| T-T-g-C-G+ | (181,183,271,354,064)                      | 10.004   |
| T-G-g-C-G+ | (181,297,274,351,062)                      | 10.085   |
| T+G+g+C+G+ | (177,061,086,008,062)                      | 10.093   |
| G-T-g-C-G- | (304,186,271,353,314)                      | 10.169   |

|            |                       |        |
|------------|-----------------------|--------|
| T-T+g+C+T  | (181,177,090,006,180) | 10.226 |
| G-G-g-C-T- | (303,304,272,352,189) | 10.242 |
| TT+g+C+G+  | (180,178,089,006,063) | 10.352 |
| G+T+a+C+g- | (063,173,092,005,284) | 10.374 |
| G-T-g+C+g+ | (301,182,090,006,077) | 10.378 |
| G-g+T-C+G- | (295,090,189,002,297) | 10.560 |
| T+G+g+C+T- | (179,063,086,009,181) | 10.610 |
| G+T+g+C+T+ | (064,175,090,006,174) | 10.678 |
| G-Tg+C+T-  | (298,180,090,006,187) | 10.716 |
| G-T-g+C+G- | (296,182,088,007,298) | 11.031 |
| G+G+g+C+G- | (069,065,089,007,287) | 11.207 |
| g-G+g+C+G- | (272,051,083,010,298) | 11.443 |
| g+G-g-C-T+ | (085,307,277,351,170) | 11.785 |
| G-a+G+C+G- | (296,096,075,011,299) | 12.154 |

---



Table S.7.: Forward classical barriers ( $V^\ddagger$ ) for ( $R_{\alpha'}$ )-( $R_\delta$ ), obtained at the theory level DLPNO-CCSD(T)-F12. All values in kcal/mol.

| Reactions         | cc-pVDZ-F12 | cc-pVTZ-F12 | cc-pVQZ-F12 | CBS <sub>D-Q</sub> |
|-------------------|-------------|-------------|-------------|--------------------|
| ( $R_{\alpha'}$ ) | 11.90       | 12.11       | 12.04       | 11.99              |
| ( $R_\alpha$ )    | 8.70        | 8.85        | 8.80        | 8.76               |
| ( $R_\beta$ )     | 9.75        | 9.90        | 9.80        | 9.73               |
| ( $R_\gamma$ )    | 9.09        | 9.16        | 9.02        | 8.92               |
| ( $R_\delta$ )    | 11.52       | 11.58       | 11.52       | 11.48              |

Table S.8.: MS-CVT/SCT rate constants for ( $R_{\alpha'}$ )-( $R_\delta$ ), including all conformations of methyl pentanoate and transition states.

| T(K) | ( $R_{\alpha'}$ ) | ( $R_\alpha$ ) | ( $R_\beta$ ) | ( $R_\gamma$ ) | ( $R_\delta$ ) |
|------|-------------------|----------------|---------------|----------------|----------------|
| 200  | 1.28E-19          | 5.42E-17       | 1.31E-17      | 2.44E-17       | 1.09E-19       |
| 298  | 1.51E-17          | 1.32E-15       | 6.61E-16      | 1.01E-15       | 2.04E-17       |
| 300  | 1.62E-17          | 1.38E-15       | 6.99E-16      | 1.06E-15       | 2.21E-17       |
| 500  | 3.11E-15          | 4.74E-14       | 4.47E-14      | 5.41E-14       | 5.60E-15       |
| 750  | 8.34E-14          | 4.70E-13       | 5.90E-13      | 6.04E-13       | 1.55E-13       |
| 1000 | 5.66E-13          | 1.90E-12       | 2.68E-12      | 2.47E-12       | 1.03E-12       |
| 1100 | 9.99E-13          | 2.92E-12       | 4.20E-12      | 3.77E-12       | 1.79E-12       |
| 1150 | 1.29E-12          | 3.54E-12       | 5.15E-12      | 4.56E-12       | 2.30E-12       |
| 1200 | 1.63E-12          | 4.24E-12       | 6.23E-12      | 5.44E-12       | 2.89E-12       |
| 1250 | 2.04E-12          | 5.03E-12       | 7.44E-12      | 6.43E-12       | 3.60E-12       |
| 1300 | 2.52E-12          | 5.91E-12       | 8.80E-12      | 7.52E-12       | 4.41E-12       |
| 1350 | 3.06E-12          | 6.88E-12       | 1.03E-11      | 8.73E-12       | 5.34E-12       |
| 1400 | 3.69E-12          | 7.96E-12       | 1.20E-11      | 1.00E-11       | 6.39E-12       |
| 1450 | 4.39E-12          | 9.13E-12       | 1.38E-11      | 1.15E-11       | 7.57E-12       |
| 1500 | 5.19E-12          | 1.04E-11       | 1.58E-11      | 1.30E-11       | 8.90E-12       |
| 1550 | 6.08E-12          | 1.18E-11       | 1.79E-11      | 1.47E-11       | 1.04E-11       |
| 1600 | 7.06E-12          | 1.33E-11       | 2.03E-11      | 1.64E-11       | 1.20E-11       |
| 1650 | 8.15E-12          | 1.49E-11       | 2.28E-11      | 1.83E-11       | 1.38E-11       |
| 1700 | 9.33E-12          | 1.66E-11       | 2.54E-11      | 2.04E-11       | 1.57E-11       |
| 1800 | 1.20E-11          | 2.04E-11       | 3.13E-11      | 2.48E-11       | 2.01E-11       |
| 1900 | 1.52E-11          | 2.46E-11       | 3.80E-11      | 2.97E-11       | 2.52E-11       |
| 2000 | 1.89E-11          | 2.93E-11       | 4.54E-11      | 3.51E-11       | 3.10E-11       |
| 2500 | 4.50E-11          | 6.03E-11       | 9.35E-11      | 6.99E-11       | 7.19E-11       |

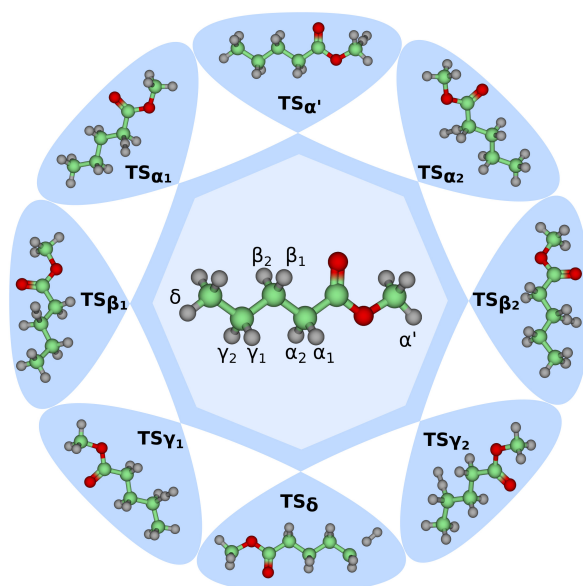

Fig. S.1.: Three-dimensional representation of methyl pentanoate (MP) and transition states generated by the reactions  $(R_{\alpha'})$ – $(R_{\delta})$ .

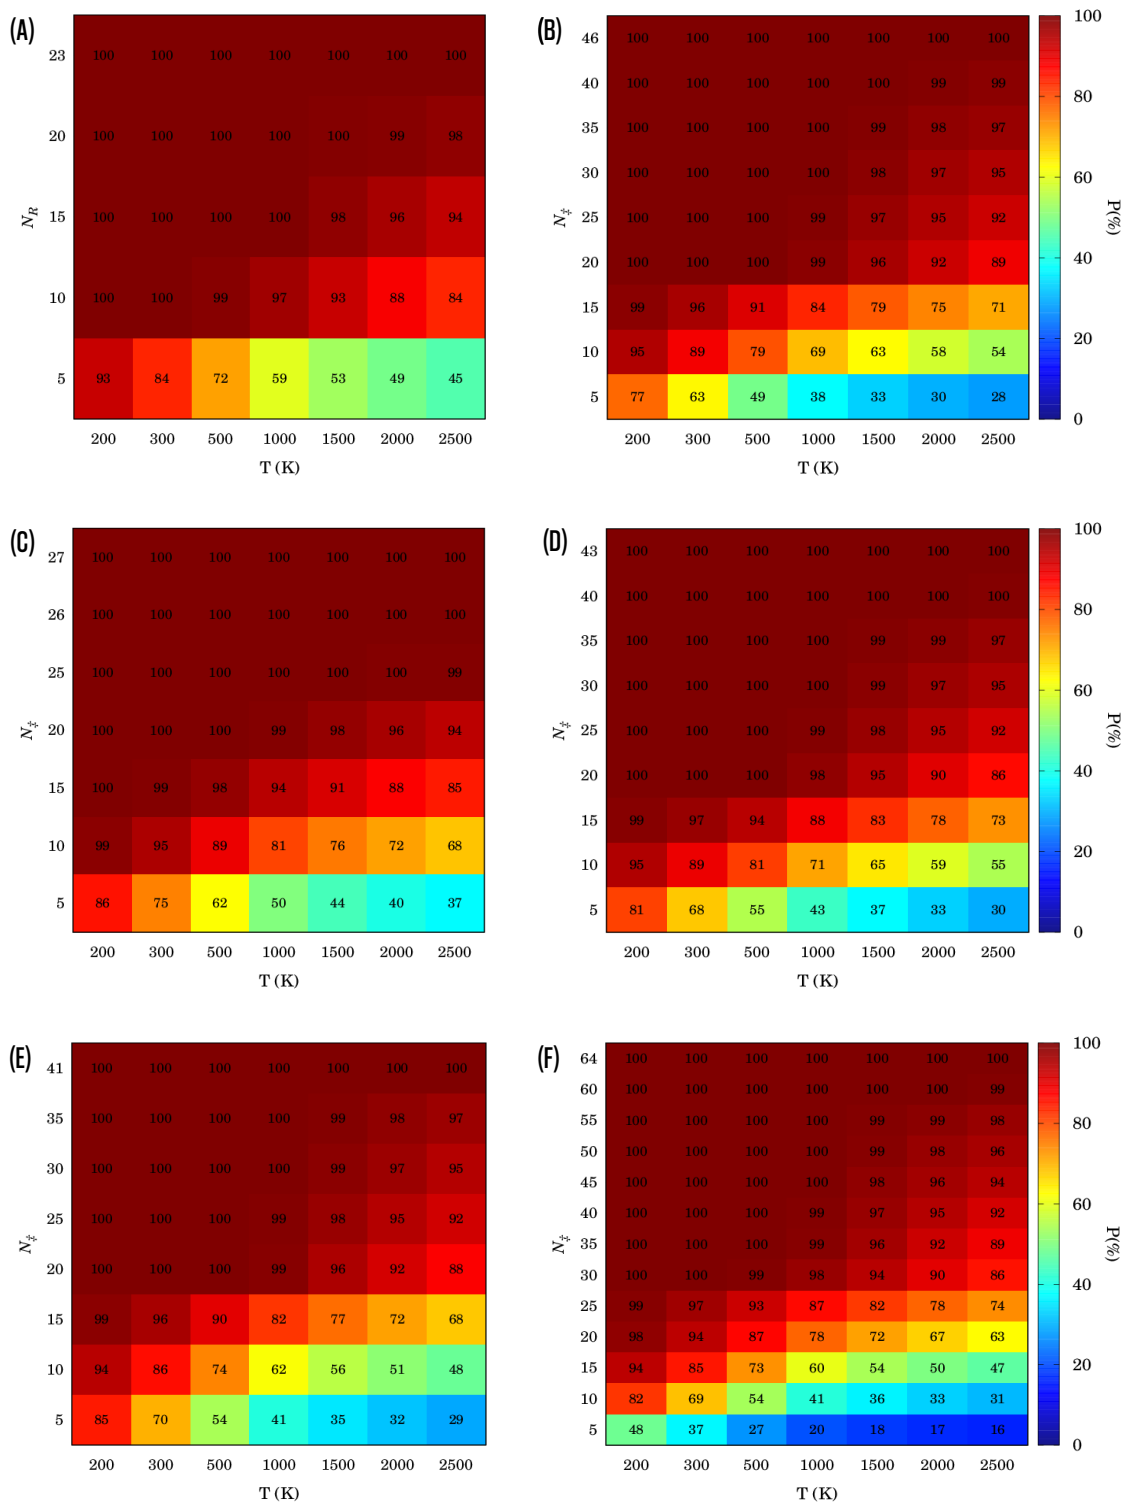

Fig. S.2.: Heatmaps plots show the truncation efficiency on the rovibrational partition function, as a function of the temperature, for MP (A),  $(TS_{\alpha'})^\ddagger$  (B),  $(TS_{\alpha})^\ddagger$  (C),  $(TS_{\beta})^\ddagger$  (D),  $(TS_{\gamma})^\ddagger$  (E), and  $(TS_{\delta})^\ddagger$  (F).

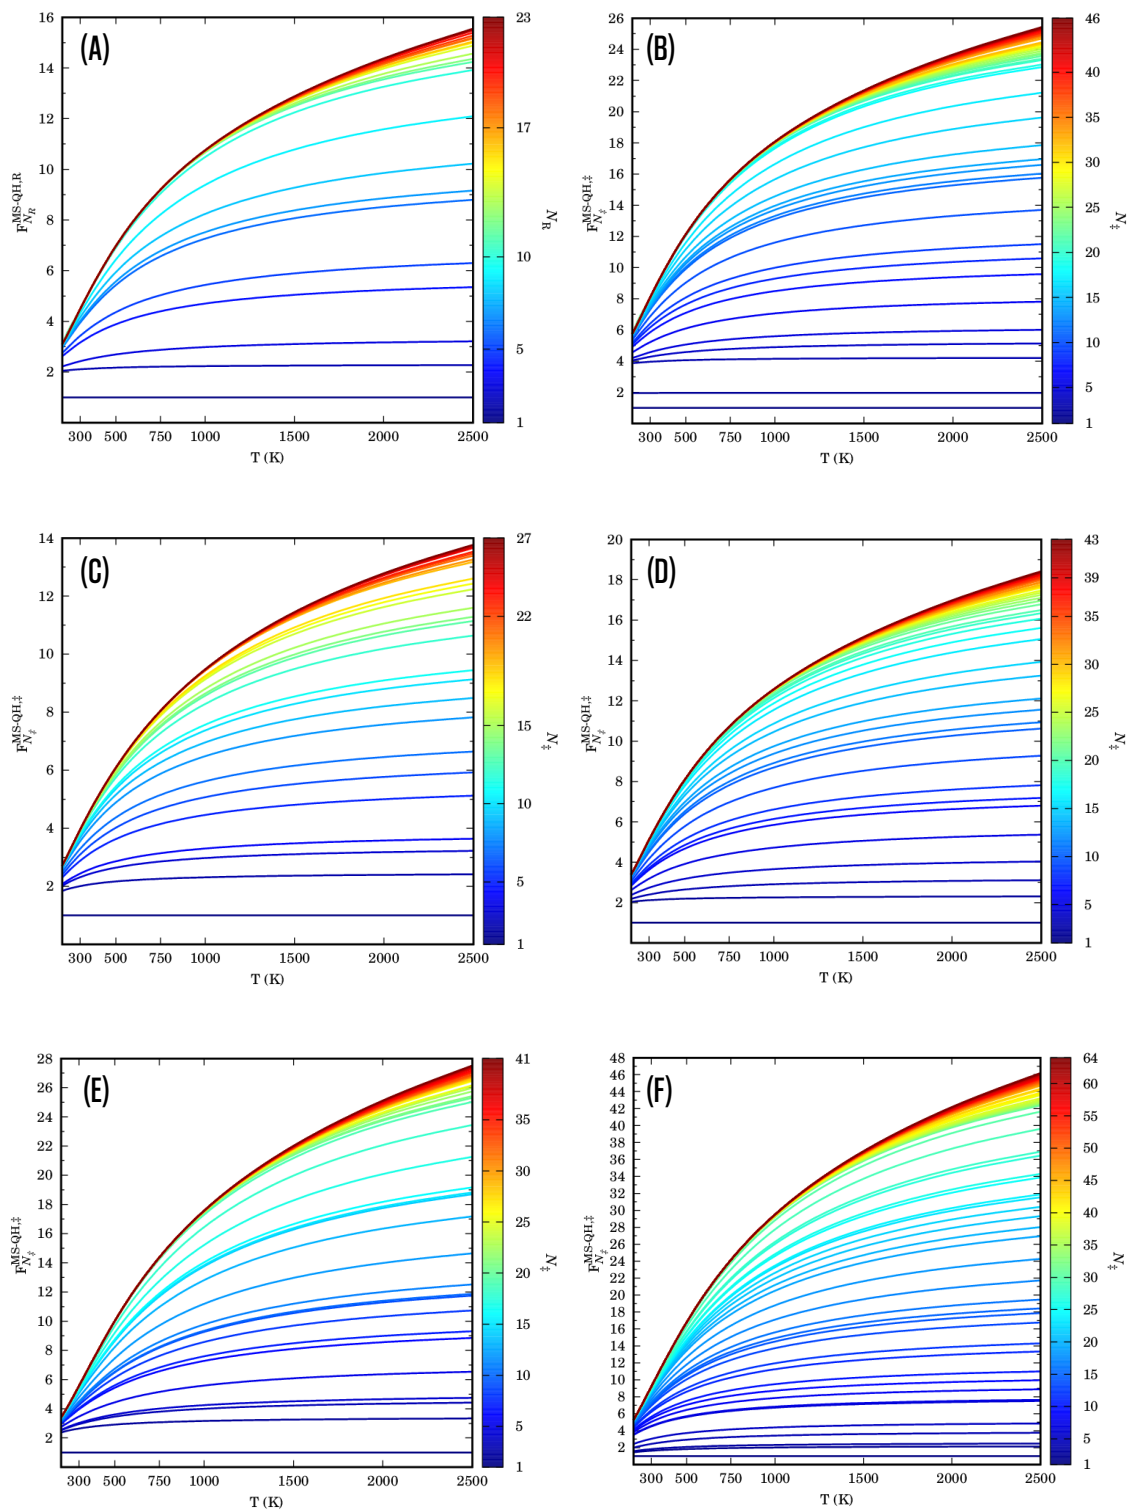

Fig. S.3.: Multistructural factors ( $F_{N_X}^{\text{MS-QH},X}$ ) as a function of temperature and different sets of conformers, for MP (A),  $(\text{TS}_{\alpha'})^{\ddagger}$  (B),  $(\text{TS}_{\alpha})^{\ddagger}$  (C),  $(\text{TS}_{\beta})^{\ddagger}$  (D),  $(\text{TS}_{\gamma})^{\ddagger}$  (E), and  $(\text{TS}_{\delta})^{\ddagger}$  (F).

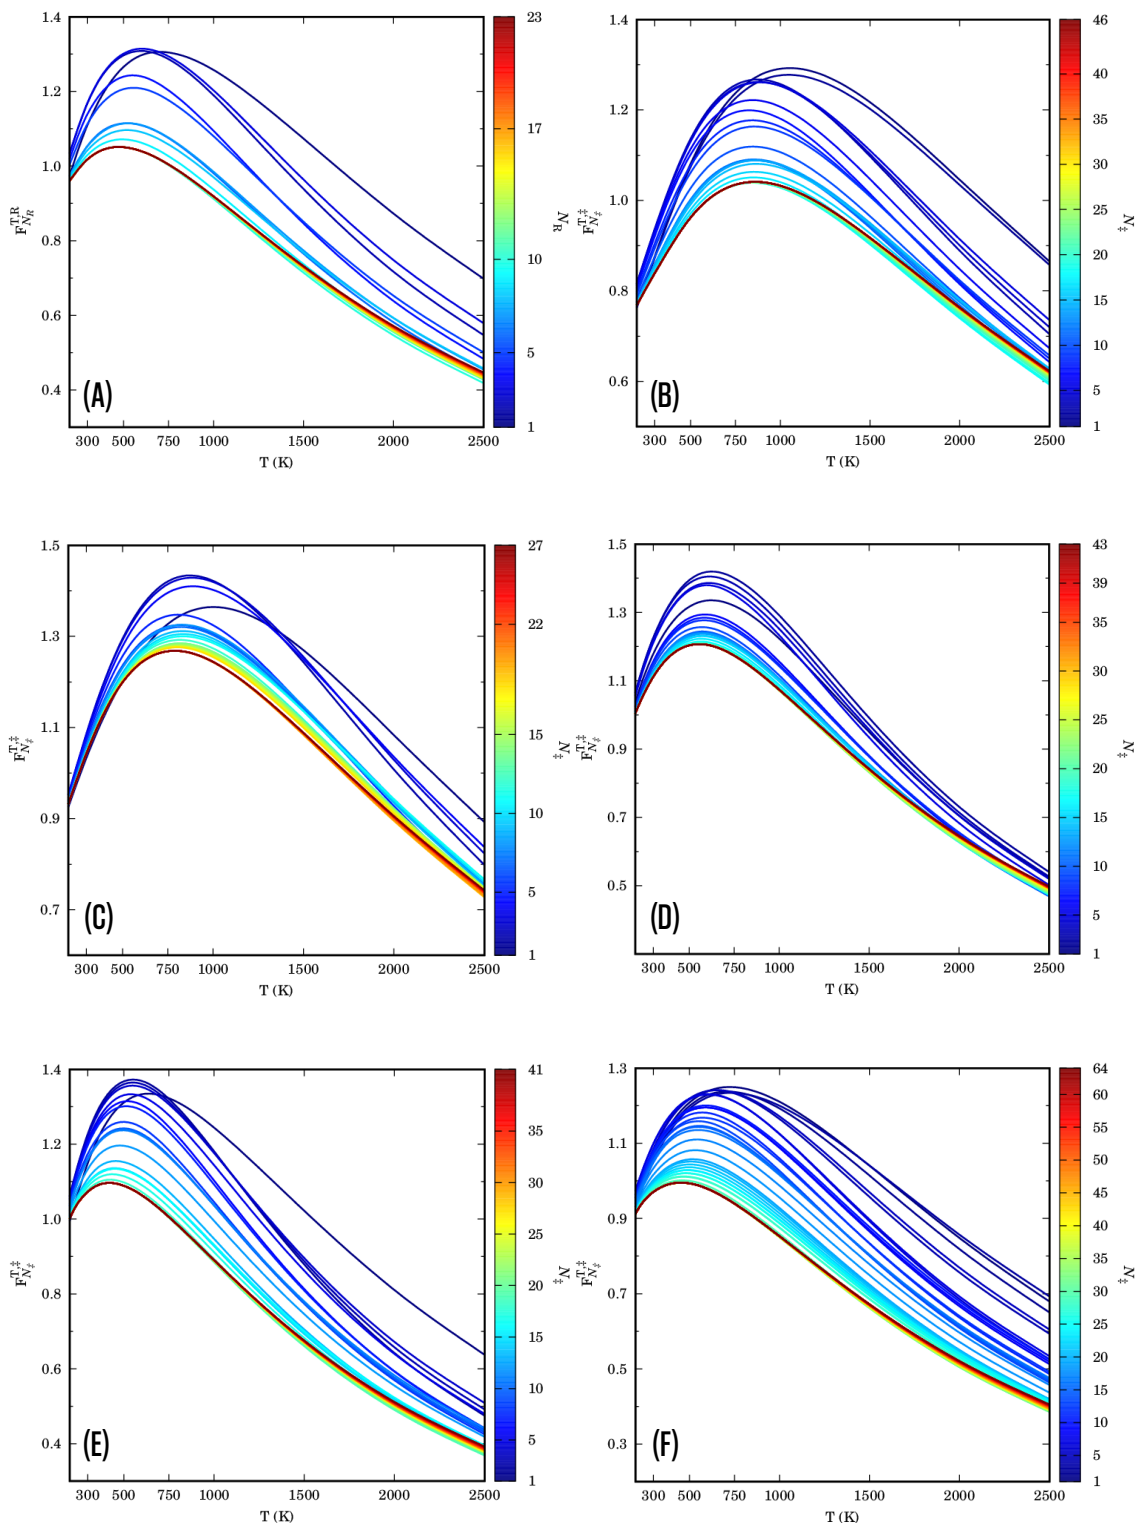

Fig. S.4.: Torsional anharmonic factors ( $F_{N_X}^{T,X}$ ) as a function of temperature and different sets of conformers, for MP (A),  $(TS_{\alpha'})^{\ddagger}$  (B),  $(TS_{\alpha})^{\ddagger}$  (C),  $(TS_{\beta})^{\ddagger}$  (D),  $(TS_{\gamma})^{\ddagger}$  (E), and  $(TS_{\delta})^{\ddagger}$  (F).

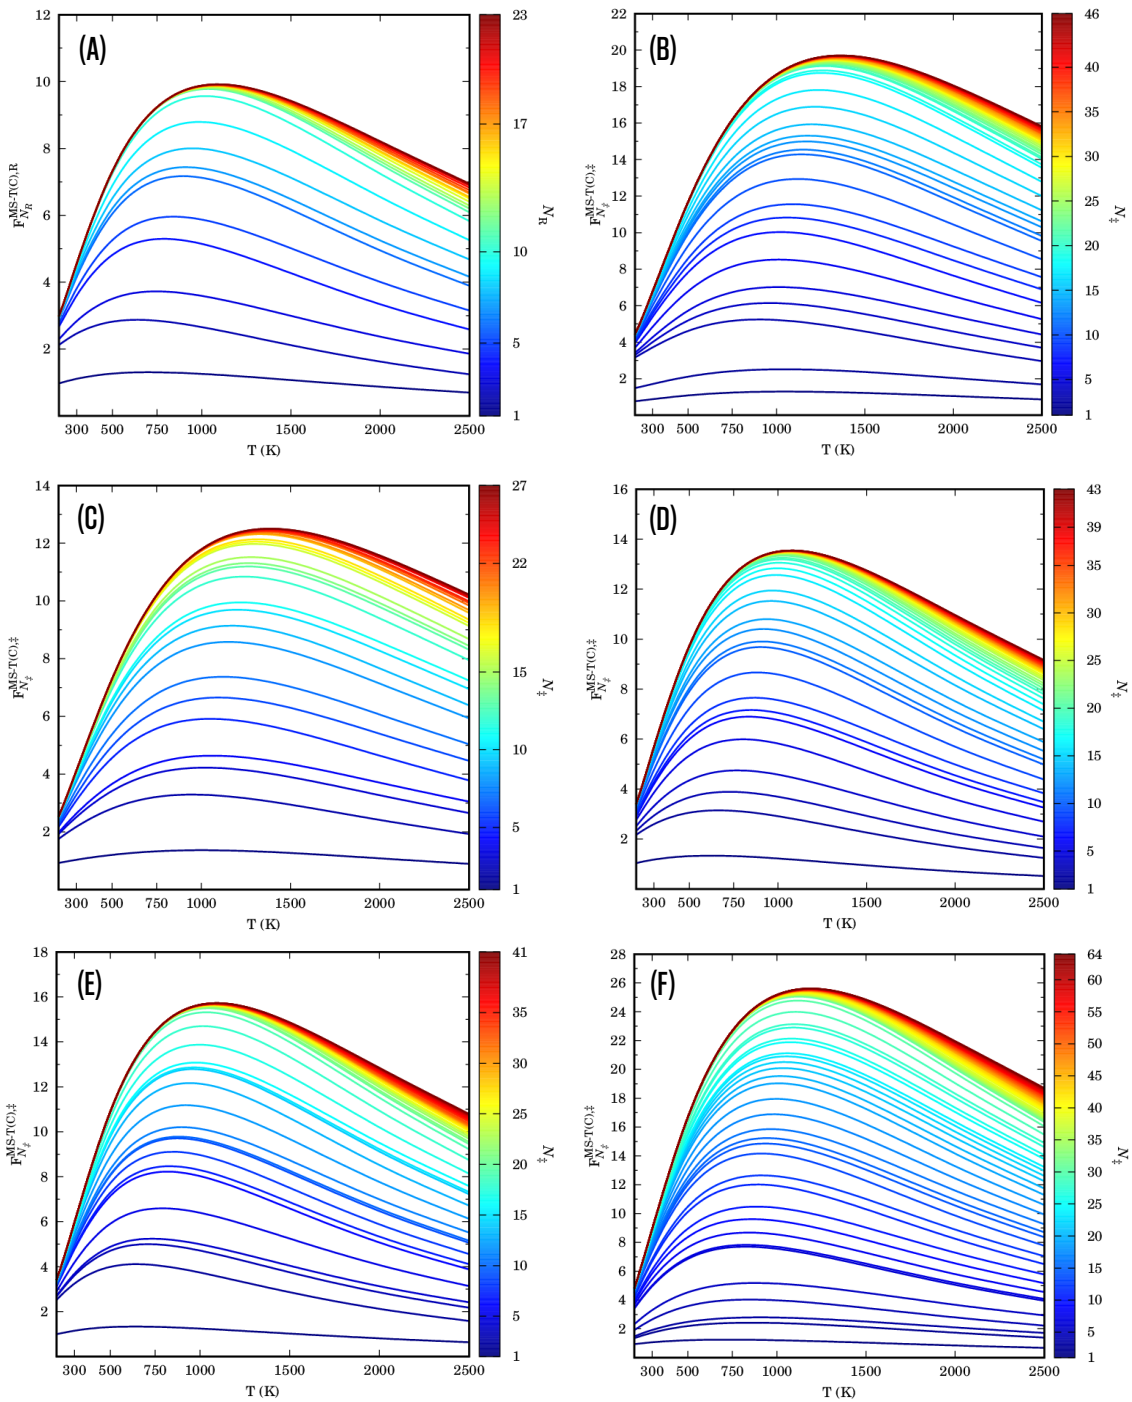

Fig. S.5.: Individual multistructural torsional anharmonic factors ( $F_{N_i}^{\text{MS-T},X}$ ) as a function of temperature and different sets of conformers, for MP (A),  $(\text{TS}_{\alpha'})^\ddagger$  (B),  $(\text{TS}_{\alpha})^\ddagger$  (C),  $(\text{TS}_{\beta})^\ddagger$  (D),  $(\text{TS}_{\gamma})^\ddagger$  (E), and  $(\text{TS}_{\delta})^\ddagger$  (F).

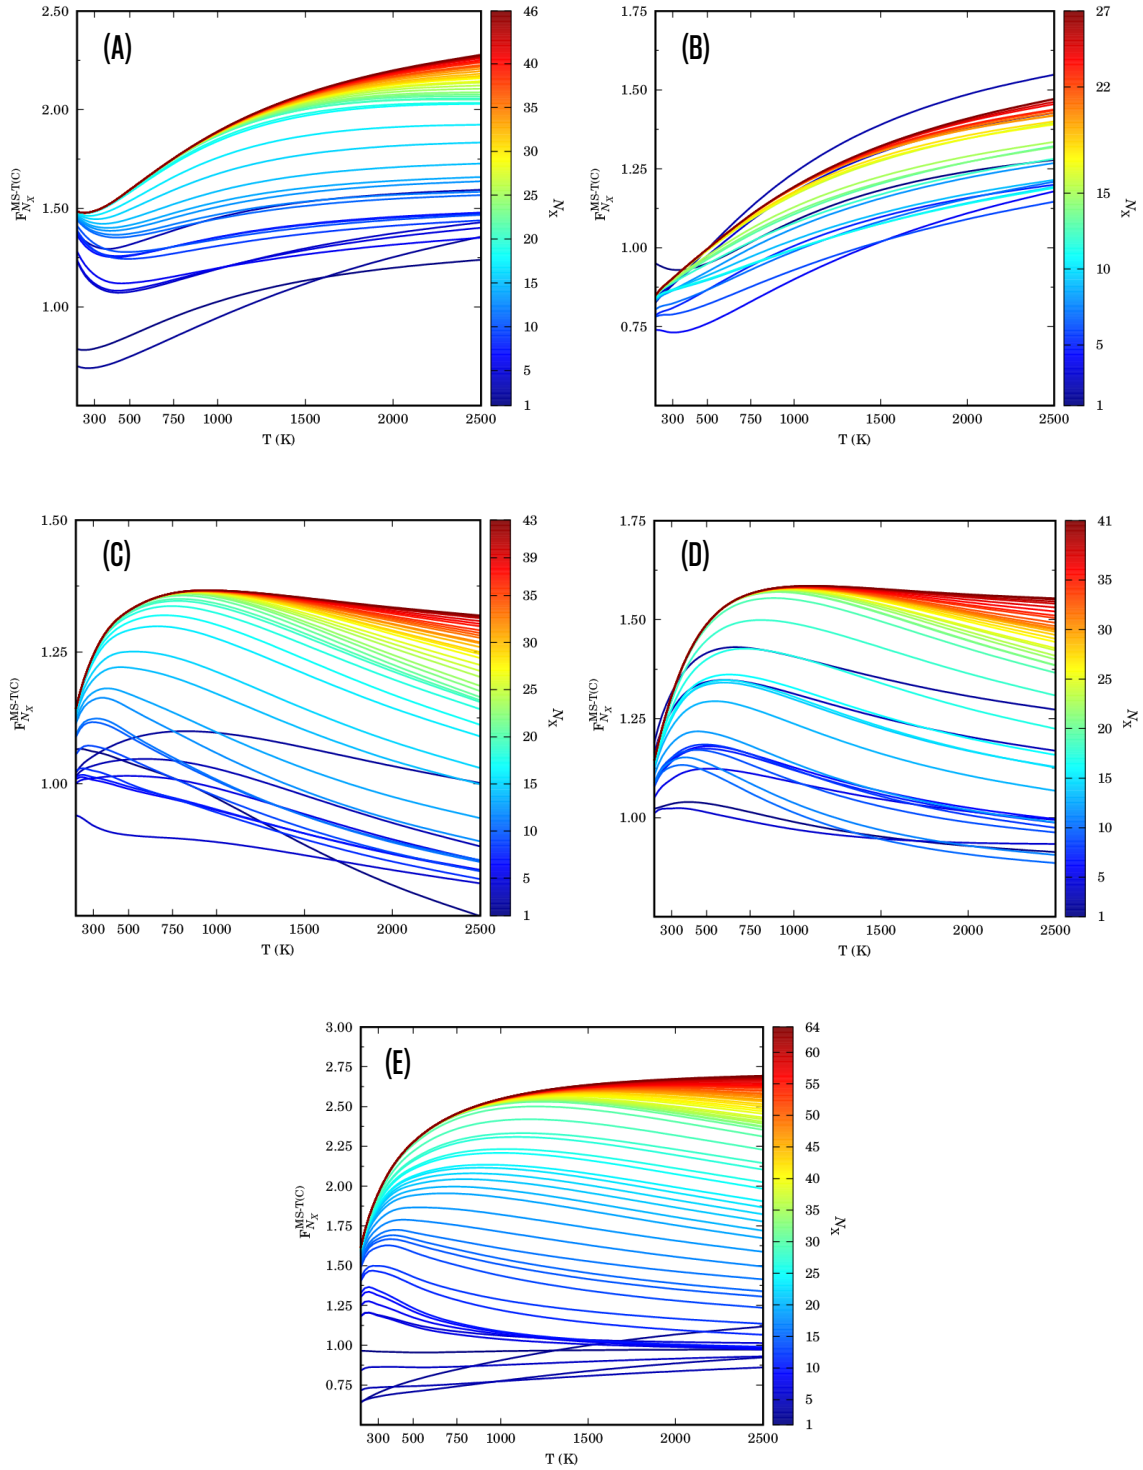

Fig. S.6.: Multistructural torsional anharmonic factor ( $F_{N_X}^{MS-T}$ ), as a function of temperature and different sets of conformers. ( $R_{\alpha'}$ ) (A), ( $R_{\alpha}$ ) (B), ( $R_{\beta}$ ) (C), ( $R_{\gamma}$ ) (D), and ( $R_{\delta}$ ) (E).

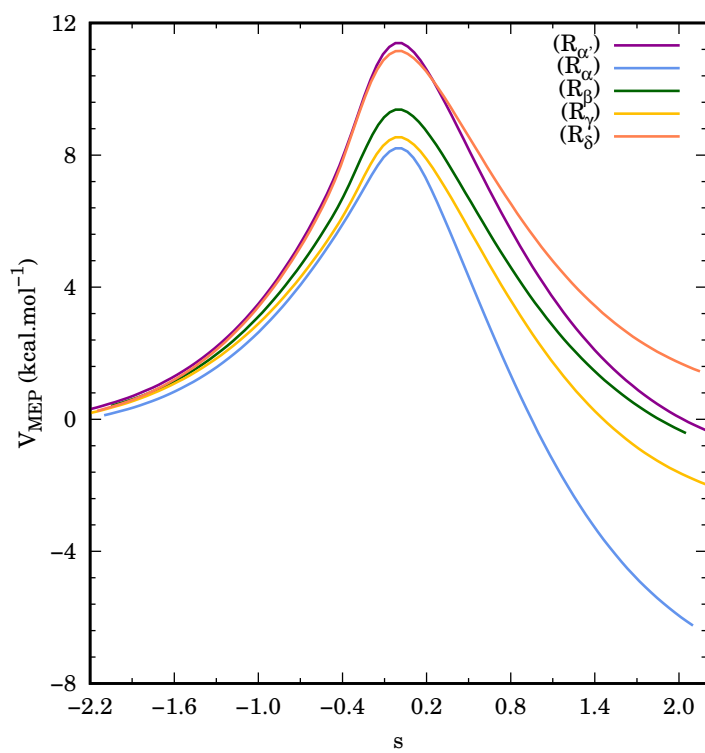

Fig. S.7.: Minimum energy path ( $V_{\text{MEP}}$ ), in kcal/mol, obtained at MPWB1K/6-31+G(d,p) theory level.



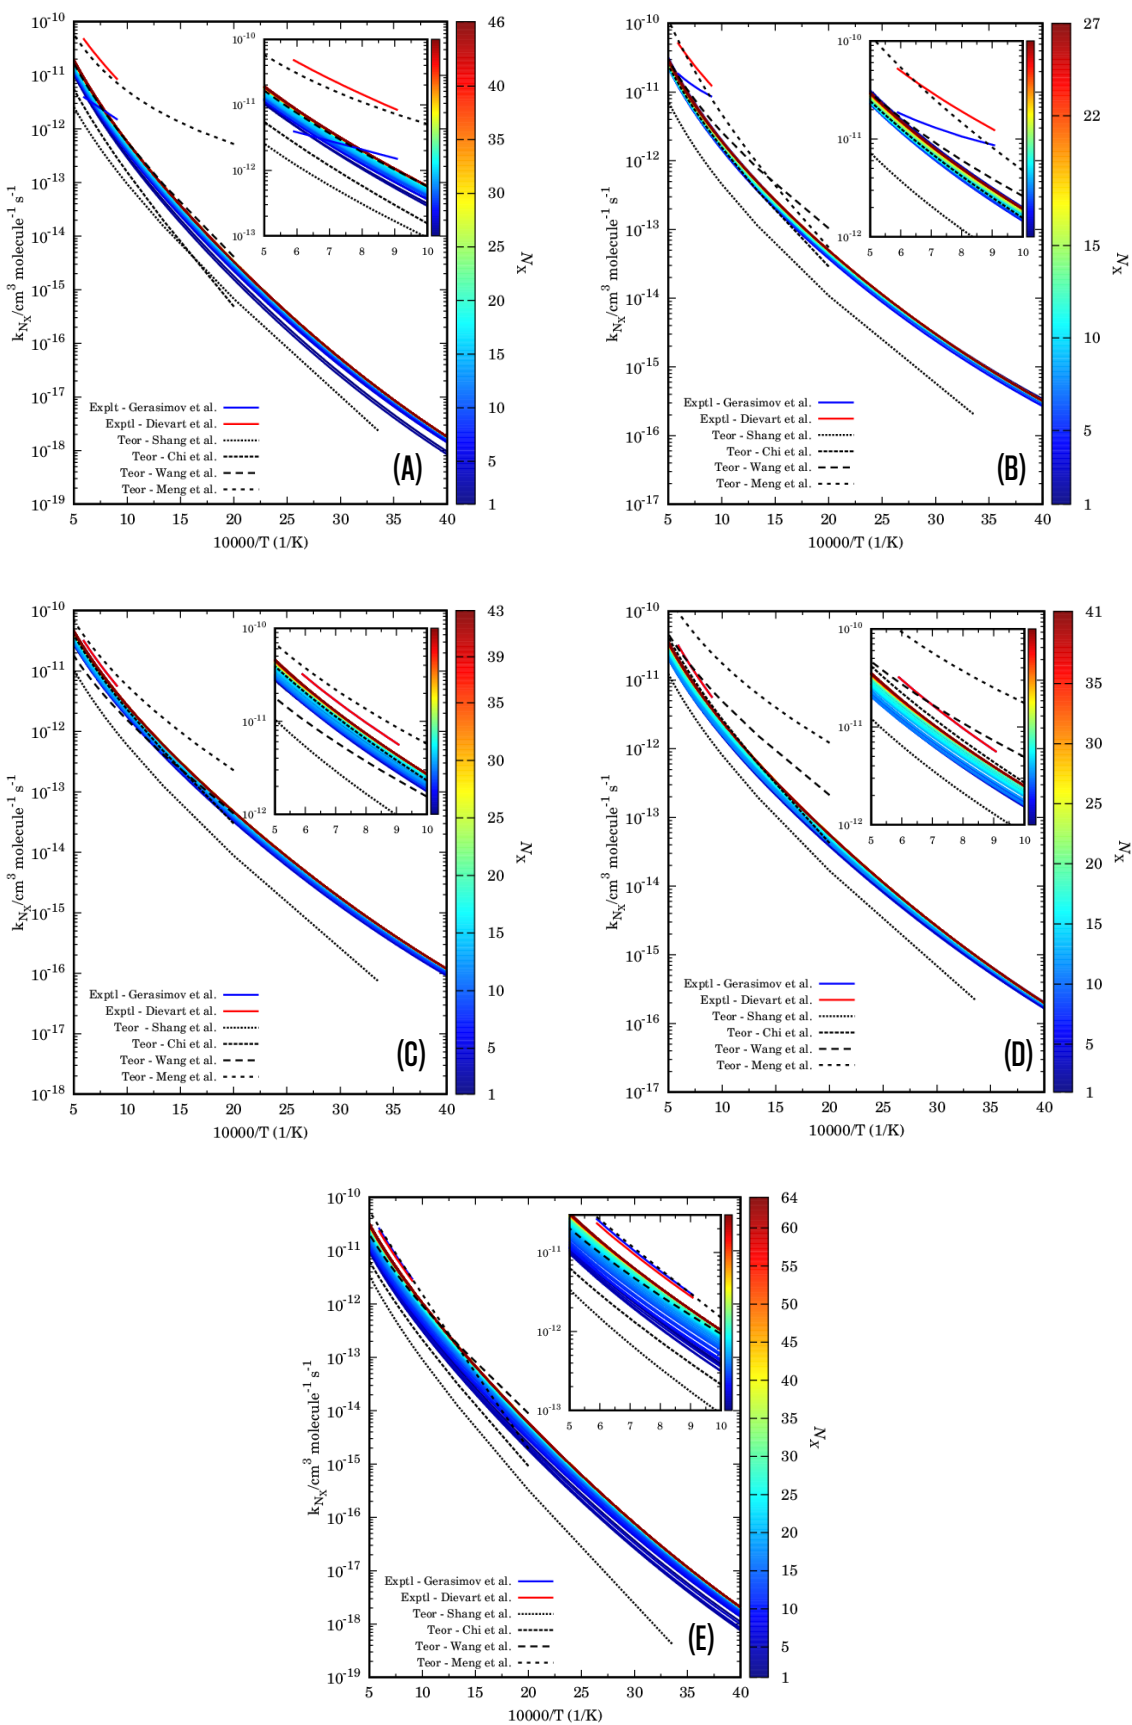

Fig. S.8.: Arrhenius plots showing MS-CVT/SCT rate constants, as a function of conformational set. Theoretical and experimental values are also showed.  $(R_{\alpha'})$  (A),  $(R_{\alpha})$  (B),  $(R_{\beta})$  (C),  $(R_{\gamma})$  (D), and  $(R_{\delta})$  (E).

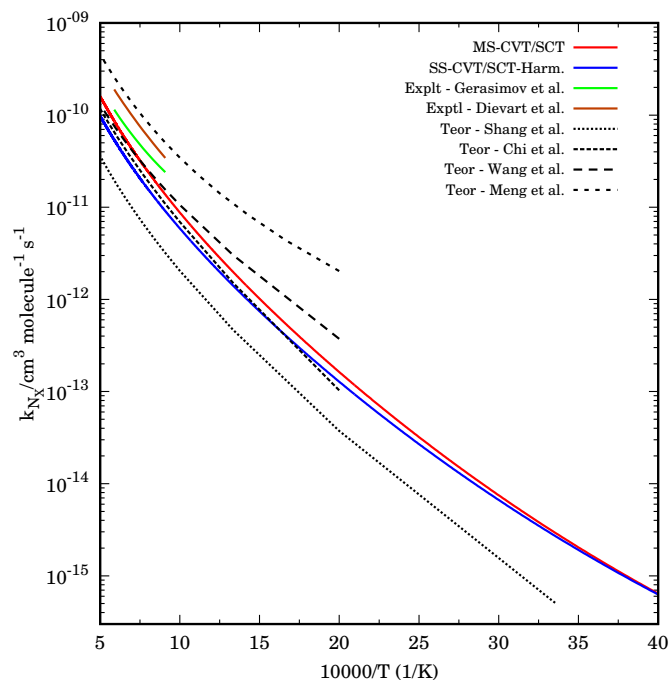

Fig. S.9.: Arrhenius plots showing overall MS-CVT/SCT and SS-CVT/SCT rate constants, as a function of temperature. Theoretical and experimental values are also showed.

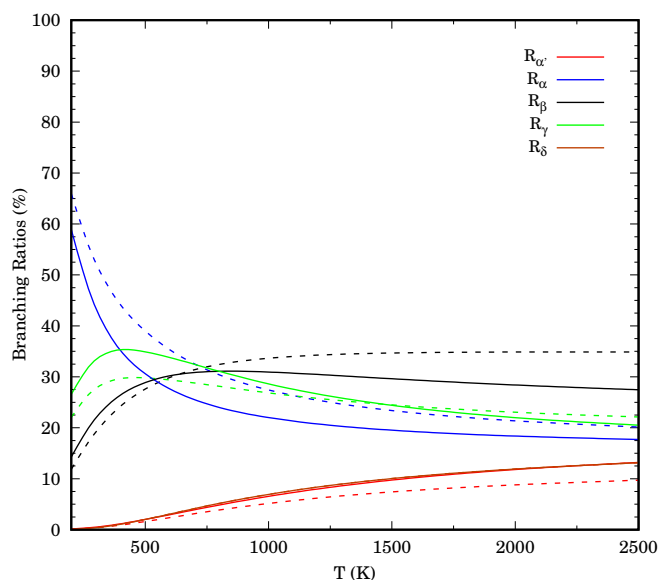

Fig. S.10.: Branching ratios for ( $R_{\alpha'}$ )-( $R_{\delta}$ ), calculated by ratio between the individual and the total rate constants. Solid line: obtained from MS-CVT/SCT rate constants. Dashed line: obtained from SS-CVT/SCT rate constants.

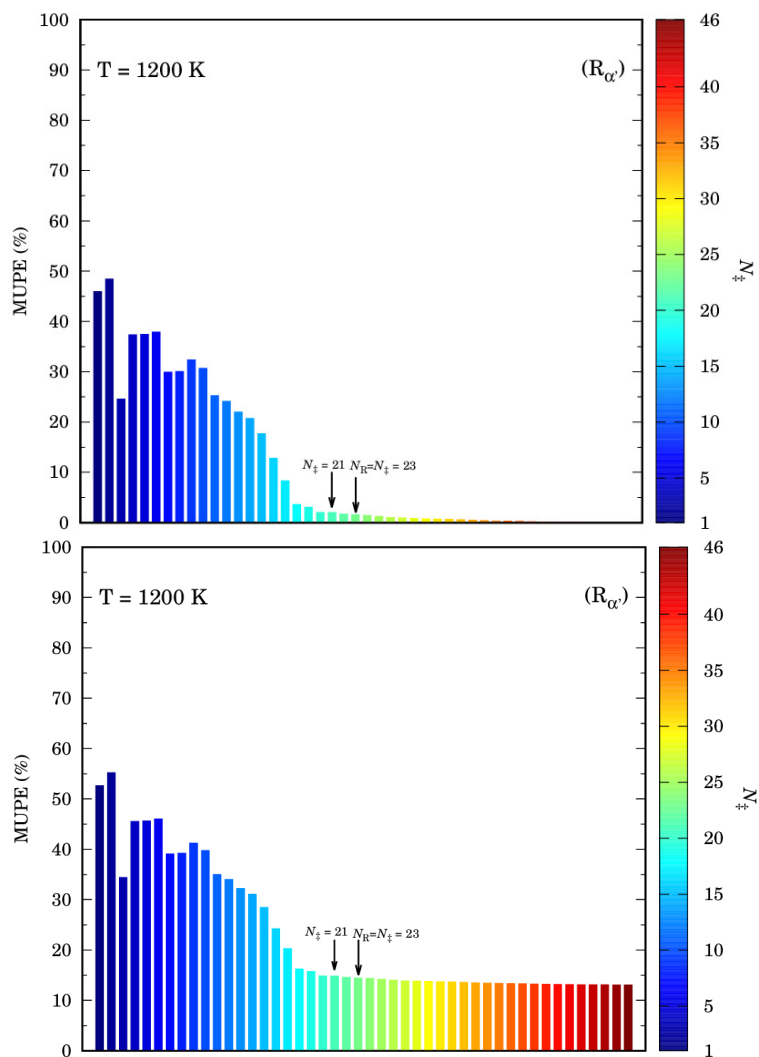

Fig. S.11.: Mean Unsigned Percentage Error (MUPE) of truncated thermal rate constants estimative, at 1200 K, compared to the full MS-CVT/SCT results (top) and Gerasimov et al. findings (bottom) for  $(R_{\alpha'})$ .

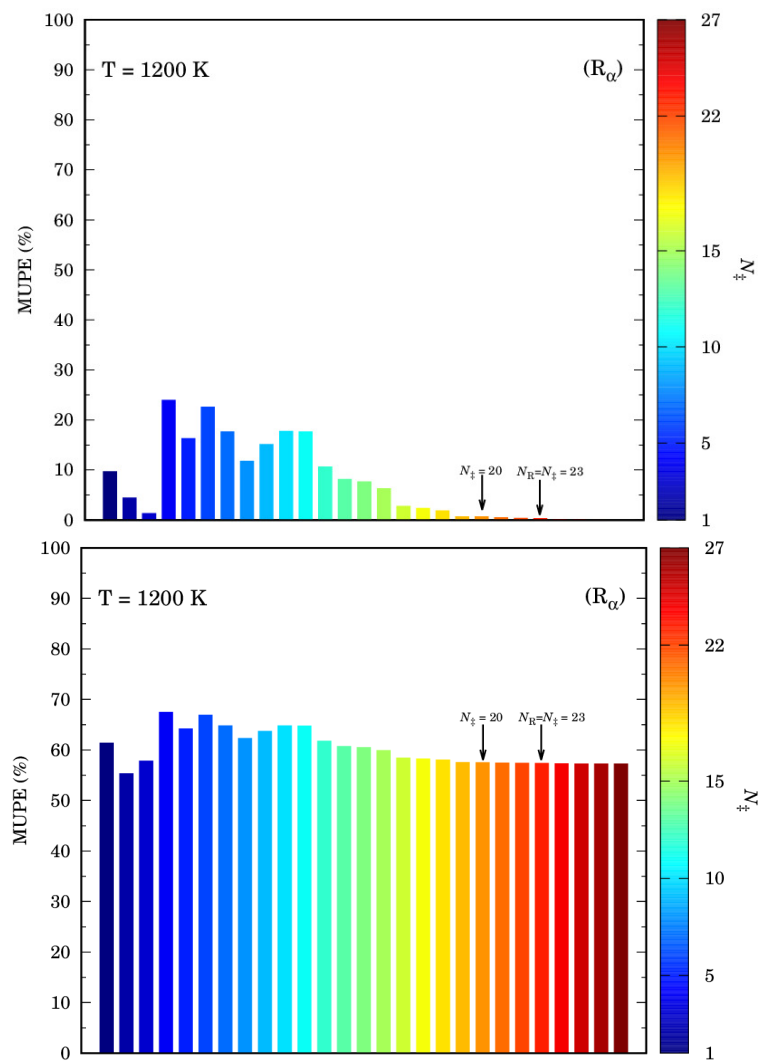

Fig. S.12.: Mean Unsigned Percentage Error (MUPE) of truncated thermal rate constants estimative, at 1200 K, compared to the full MS-CVT/SCT results (top) and Gerasimov et al. findings (bottom) for  $(R_\alpha)$ .

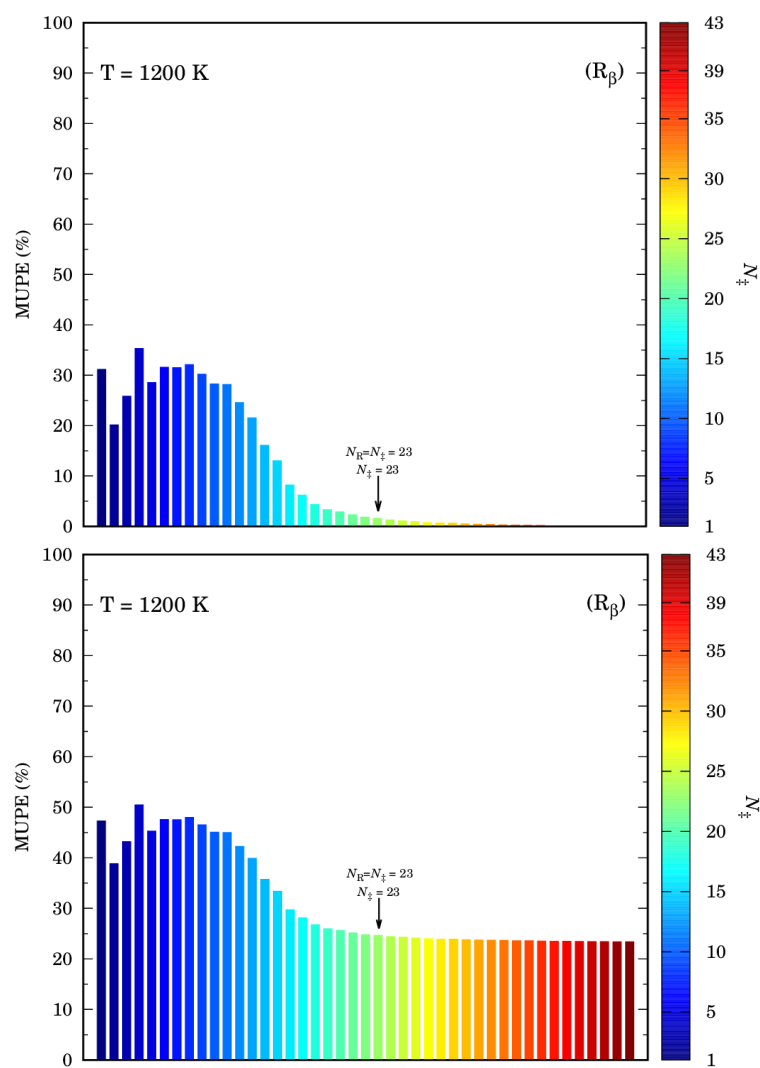

Fig. S.13.: Mean Unsigned Percentage Error (MUPE) of truncated thermal rate constants estimative, at 1200 K, compared to the full MS-CVT/SCT results (top) and Gerasimov et al. findings (bottom) for  $(R_\beta)$ .

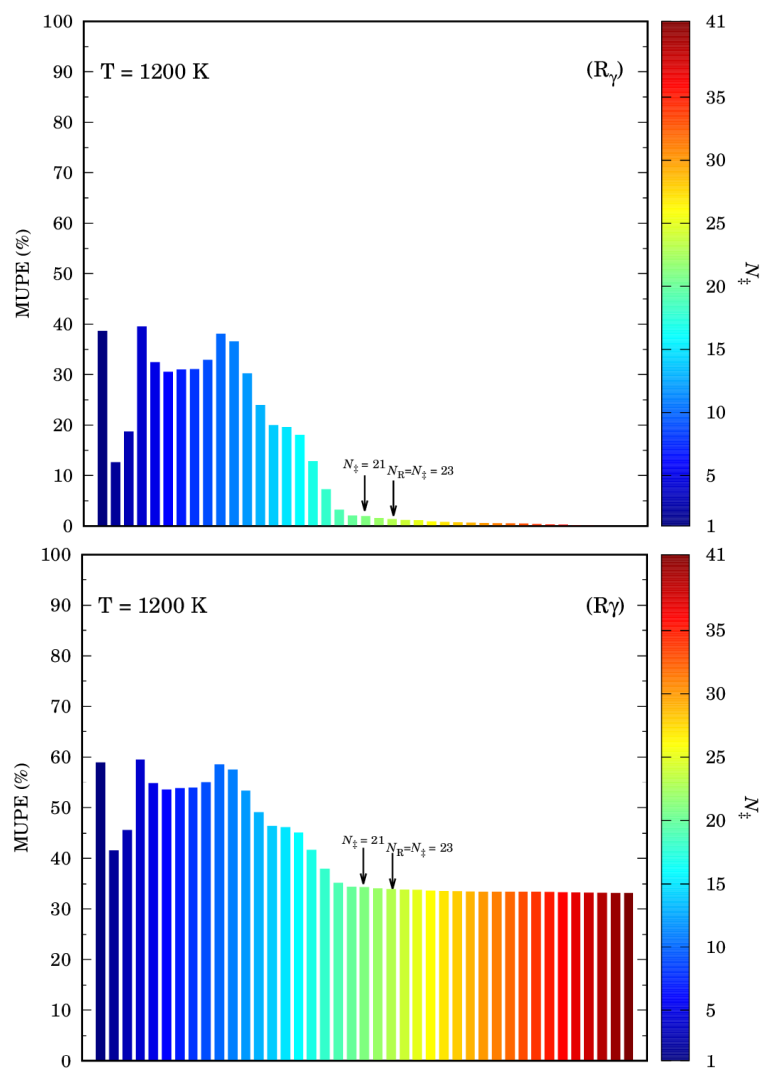

Fig. S.14.: Mean Unsigned Percentage Error (MUPE) of truncated thermal rate constants estimative, at 1200 K, compared to the full MS-CVT/SCT results (top) and Gerasimov et al. findings (bottom) for  $(R_\gamma)$ .

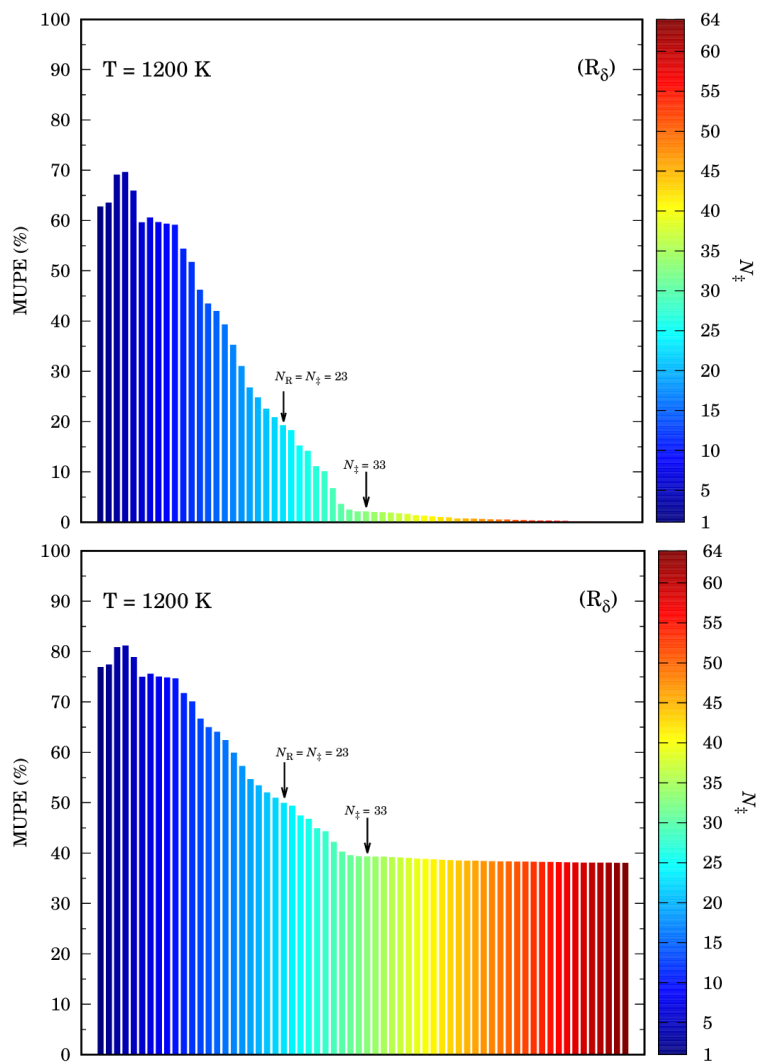

Fig. S.15.: Mean Unsigned Percentage Error (MUPE) of truncated thermal rate constants estimative, at 1200 K, compared to the full MS-CVT/SCT results (top) and Gerasimov et al. findings (bottom) for  $(R_\delta)$ .
